# Supplementary material for: DNA Methylation Signature of a Lifestyle-based Resilience Index for Cognitive Health
Source: Research Square preprint supplement (doi:10.21203/rs.3.rs-5423573/v1), 2024-11-27
Supplement: Supplementary file 1 [file ac0e6ad15135001ff76e4b3d.xlsx]

## Sheet: S1
	Supplementary Table 1 A total of 56 CpGs were significantly associated with the Resilience Index (RI) in the analysis of blood samples from the HBI cohort at P < 10-5. Among them, 19 CpGs also reached 5% FDR. The robust linear model included methylation M value as the outcome, Resilience Index (RI) in z-scores as the main independent variable, and covariate variables age, sex, diagnosis (MCI, CN)…
	CpG	Estimate	StdErr	pValue	fdr	chr	position	GREAT_annotation	geneNames	RelationToGene	distToTSS	Relation_to_Island
	cg22125370	-0.174514	0.0287198	1.22871e-09	0.000558188	chr12	93572709	CRADD (-105008);SOCS2 (+1028)	SOCS2;SOCS2;SOCS2;SOCS2;SOCS2;SOCS2;SOCS2;SOCS2;SOCS2;SOCS2;SOCS2-AS1;SOCS2-AS1;SOCS2-AS1	Body;Body;Body;Body;Body;Body;Body;Body;1stExon;Body;TSS1500;TSS1500;TSS1500	2895;1729;574;1385;1005;1348;2310;809;34;1028;-940;-940;-1310	Island
	cg01684389	-0.213824	0.0352109	1.25805e-09	0.000558188	chr15	31065241	MTMR10 (-73637);TRPM1 (+96032)	MIR211;TRPM1;TRPM1;TRPM1;TRPM1;TRPM1;TRPM1;TRPM1;TRPM1	TSS200;5'UTR;5'UTR;5'UTR;5'UTR;5'UTR;5'UTR;5'UTR;5'UTR	-99;36466;2852;36485;36467;96033;95714;2852;95714	OpenSea
	cg03215315	-0.184314	0.0336607	4.35938e-08	0.0120789	chr4	105708826	GSTCD (+8);INTS12 (+282)	GSTCD;GSTCD;GSTCD;GSTCD;GSTCD;GSTCD;INTS12;INTS12;INTS12;INTS12;INTS12;INTS12;INTS12;INTS12;INTS12	1stExon;1stExon;1stExon;1stExon;1stExon;1stExon;TSS200;TSS1500;TSS200;TSS200;TSS200;5'UTR;TSS200;5'UTR;TSS200	42;42;39;48;42;39;-136;-744;-186;-166;-142;283;-160;187161;-169	Island
	cg23351331	0.23472	0.0435867	7.23928e-08	0.0120789	chr18	24160113	CABYR (+21018);OSBPL1A (+237746)	CABYR;CABYR;CABYR;CABYR;CABYR;CABYR;CABYR;CABYR;CABYR;CABYR;ENSG00000265750	1stExon;Body;Body;Body;Body;Body;Body;Body;Body;Body;5'UTR	297;21081;21096;21051;20629;21045;21055;21051;4009;21018;2099	OpenSea
	cg24419436	-0.25725	0.0478929	7.81441e-08	0.0120789	chr19	4446034	UBXN6 (+11788);CHAF1A (+43372)	ENSG00000267030;MIR4746;UBXN6;UBXN6;UBXN6;UBXN6;UBXN6;UBXN6;UBXN6	TSS1500;1stExon;5'UTR;5'UTR;5'UTR;5'UTR;5'UTR;5'UTR;1stExon	-1270;56;587;11761;9265;8060;2083;665;3571	Island
	cg02959866	0.213953	0.0398913	8.16708e-08	0.0120789	chr2	26142102	GAREM2 (-30989);RAB10 (+107992)	EMP2P1	TSS1500	-837	OpenSea
	cg05170851	0.154257	0.0290741	1.1227e-07	0.0142324	chr3	193897344	HES1 (-238801);OPA1 (+304200)				OpenSea
	cg13582261	0.117832	0.0223372	1.3265e-07	0.0147139	chr9	34180004	UBAP1 (+999)	UBAP1;UBAP1;UBAP1;UBAP1	Body;Body;Body;Body	961;966;999;959	Shore
	cg16559708	0.300159	0.0575696	1.84964e-07	0.0168602	chr1	7070435	VAMP3 (-700834);CAMTA1 (+285111)	CAMTA1;CAMTA1;CAMTA1;CAMTA1;CAMTA1;CAMTA1	Body;Body;Body;Body;Body;Body	284961;284938;284981;284917;284938;284904	OpenSea
	cg00459767	-0.172722	0.0331592	1.89999e-07	0.0168602	chrX	20139847	MAP7D2 (-22930);EIF1AX (+1997)	EIF1AX;EIF1AX;EIF1AX-AS1	5'UTR;5'UTR;TSS200	1980;1992;-121	Shore
	cg00604193	0.204362	0.0395331	2.34852e-07	0.0189458	chr22	19048380	PRODH (-111827);DGCR2 (+74074)	DGCR11;DGCR2;DGCR2;DGCR2;DGCR2;DGCR2;DGCR2	TSS200;5'UTR;1stExon;5'UTR;5'UTR;5'UTR;5'UTR	-4;74028;14898;74033;74075;74075;8674	OpenSea
	cg22094207	0.231852	0.0452904	3.06781e-07	0.022686	chr19	57870709	ZNF814 (+18328);ZNF587 (+20852)	ZNF814;ZNF814;ZNF814;ZNF814;ZNF814;ZNF814;ZNF814;ZNF814;ZNF814;ZNF814;ZNF814	5'UTR;5'UTR;5'UTR;1stExon;5'UTR;5'UTR;5'UTR;5'UTR;5'UTR;5'UTR;1stExon	18099;18329;18366;18329;18072;18113;18212;18250;18311;18109;951	OpenSea
	cg20071972	-0.42213	0.0845712	5.99384e-07	0.0391229	chr14	31258345	HECTD1 (-50862);ENSG00000203546 (+199062)	ENSG00000257831	Body	9717	OpenSea
	cg25245899	-0.16556	0.0332067	6.1723e-07	0.0391229	chr20	38833454	FAM83D (-92972);PPP1R16B (+27749)	PPP1R16B;PPP1R16B	Body;Body	27757;27730	Shelf
	cg04935888	-0.217077	0.0437241	6.88079e-07	0.040706	chr5	127664120	SLC12A2 (-419646);CTXN3 (+15076)	ENSG00000248799	TSS200	-90	OpenSea
	cg25394179	0.159612	0.0322463	7.4295e-07	0.0412051	chr12	8058214	C3AR1 (+8257);FOXJ2 (+25511)	C3AR1	1stExon	8146	OpenSea
	cg06719359	-0.11963	0.0243006	8.52692e-07	0.0429101	chr2	109476062	SEPT10 (+138081);SH3RF3 (+346714)	SH3RF3	Body	346857	OpenSea
	cg19995038	-0.1611	0.0327514	8.70403e-07	0.0429101	chr2	64835206	SERTAD2 (-181293);SLC1A4 (-154195)	Y_RNA	TSS1500	-1048	OpenSea
	cg05752118	0.127775	0.0261808	1.05827e-06	0.0494257	chr11	2899334	SLC22A18 (-3086)	SLC22A18;SLC22A18AS;SLC22A18AS;SLC22A18AS	TSS1500;5'UTR;5'UTR;5'UTR	-387;4480;4242;4480	Shelf
	cg10875423	-0.200583	0.041293	1.18837e-06	0.0527271	chr4	78020965	FRAS1 (-36605);MRPL1 (+158445)				OpenSea
	cg06926607	-0.214795	0.0444132	1.32283e-06	0.0558979	chr4	107283576	DKK2 (-247279);PAPSS1 (+436876)	DKK2;DKK2;ENSG00000251081	5'UTR;5'UTR;Body	231;114;24876	OpenSea
	cg26108120	0.114142	0.0238241	1.65938e-06	0.066932	chr3	72391642	PROK2 (-606581);RYBP (+54979)	RYBP	5'UTR	54980	OpenSea
	cg14158777	-0.238008	0.0500802	2.00881e-06	0.0775036	chr21	44850779	SUMO3 (-32650);PTTG1IP (+23058)	PTTG1IP;PTTG1IP;PTTG1IP	1stExon;1stExon;1stExon	22912;22931;23125	Shore
	cg13576024	-0.257125	0.0548194	2.72654e-06	0.0988526	chr15	81341478	STARD5 (-17353);TMC3 (+32735)	TMC3;TMC3;TMC3;TMC3-AS1;TMC3-AS1;TMC3-AS1;TMC3-AS1;TMC3-AS1;TMC3-AS1;TMC3-AS1;TMC3-AS1;TMC3-AS1;TMC3-AS1;TMC3-AS1;TMC3-AS1;TMC3-AS1;TMC3-AS1;TMC3-AS1	5'UTR;5'UTR;5'UTR;Body;Body;Body;Body;Body;Body;Body;Body;Body;Body;Body;Body;Body;Body;Body	32736;32736;32679;17110;17101;9567;17040;17034;9131;17136;17135;16968;17140;17136;16969;16964;16910;16990	OpenSea
	cg00151565	-0.167908	0.0358833	2.87879e-06	0.0988526	chr1	173992766	SERPINC1 (-75388);RC3H1 (+29531)	RC3H1;RC3H1;RC3H1	5'UTR;5'UTR;5'UTR	299;307;29592	OpenSea
	cg21245629	0.137406	0.0293725	2.89634e-06	0.0988526	chr10	19945363	PLXDC2 (+129124);NEBL (+952239)	PLXDC2;PLXDC2	Body;Body	129124;128931	OpenSea
	cg05737522	-0.244507	0.0528013	3.64422e-06	0.110592	chr8	96867707	CPQ (+222480);TSPYL5 (+410257)	CPQ	Body	222465	OpenSea
	cg08720250	-0.0738053	0.0159452	3.67998e-06	0.110592	chr12	107243448	CRY1 (-149619);BTBD11 (-74965)				OpenSea
	cg12504957	0.191567	0.0414003	3.70666e-06	0.110592	chr12	68808280	MDM2 (+104)	MDM2;MDM2;MDM2;MDM2;MDM2;MDM2;MDM2;MDM2;MDM2;MDM2;MDM2;MDM2;MDM2;MDM2;MDM2;MDM2;MDM2;MDM2;MDM2;MDM2;MDM2;MDM2;MDM2;MDM2;MDM2;MDM2;MDM2;MDM2;MDM2;MDM2;MDM2	1stExon;TSS200;TSS1500;TSS1500;TSS1500;TSS1500;TSS1500;TSS1500;TSS1500;TSS1500;TSS1500;TSS1500;TSS200;1stExon;TSS1500;TSS1500;TSS1500;TSS1500;TSS1500;1stExon;TSS1500;TSS1500;TSS1500;TSS1500;TSS1500;TSS1500;TSS1500;TSS1500;TSS1500;TSS1500;TSS200	7;-103;-931;-932;-932;-932;-932;-932;-932;-932;-932;-932;-184;103;-932;-946;-932;-932;-932;89;-932;-737;-744;-946;-932;-737;-722;-737;-932;-932;-2	Island
	cg14456683	0.122914	0.0265917	3.79557e-06	0.110592	chr3	147409223	ZIC4 (-4939);ZIC1 (-161)	ZIC1;ZIC1;ZIC1	Body;TSS200;Body	15801;-142;15328	Island
	cg05697908	0.232701	0.0503834	3.86345e-06	0.110592	chr18	29160332	CDH2 (-982886)				OpenSea
	cg14571130	-0.181117	0.0393258	4.11384e-06	0.11408	chr20	58461509	APCDD1L (+53429);VAPB (+72387)	APCDD1L;APCDD1L	1stExon;1stExon	472;53891	Island
	cg20968200	0.0955775	0.0207979	4.31638e-06	0.116069	chr11	67302693	SSH3 (-755)	SSH3;SSH3;SSH3;SSH3;SSH3;SSH3;SSH3	TSS1500;TSS1500;TSS1500;TSS1500;TSS1500;TSS1500;TSS1500	-837;-933;-1016;-837;-787;-785;-1430	Shore
	cg06150841	0.130271	0.0284953	4.8384e-06	0.123774	chr1	61141021	NFIA (+59159);TM2D1 (+584120)	NFIA;NFIA;NFIA;NFIA;NFIA;NFIA;NFIA;NFIA;NFIA;NFIA;NFIA;NFIA;NFIA;NFIA;NFIA;NFIA;NFIA;NFIA;NFIA;NFIA;NFIA;NFIA	Body;Body;Body;Body;Body;Body;Body;Body;Body;Body;Body;Body;Body;Body;Body;Body;Body;Body;Body;Body;Body;Body	58598;275689;58623;58598;59254;58267;58273;58400;59159;275762;58460;63747;87191;58329;58298;58623;63635;58623;58560;58898;58600;58331	OpenSea
	cg12268385	0.113464	0.0248705	5.06272e-06	0.123774	chr3	142285291	GK5 (-59684);XRN1 (+162771)				OpenSea
	cg06329106	-0.259973	0.0570014	5.09527e-06	0.123774	chr8	20952870	LZTS1 (-648907);GFRA2 (+835940)	ENSG00000254092;ENSG00000254092;ENSG00000254092;ENSG00000254092;ENSG00000254092;ENSG00000254092;ENSG00000254092;ENSG00000254092;ENSG00000254092;ENSG00000254092;LINC03023;LINC03023;LINC03023	1stExon;1stExon;1stExon;1stExon;1stExon;1stExon;1stExon;5'UTR;5'UTR;1stExon;TSS1500;TSS1500;TSS1500	21008;20986;159859;344986;345299;176219;176266;20986;176223;176228;-1142;-772;-257	OpenSea
	cg10512472	-0.201922	0.0442992	5.16083e-06	0.123774	chr6	160047272	SLC22A1 (-74517);IGF2R (+78173)	IGF2R;IGF2R;IGF2R	Body;Body;Body	78190;78190;78190	OpenSea
	cg05340882	-0.334359	0.0741122	6.43638e-06	0.150304	chr19	2543752	GADD45B (+67625);GNG7 (+158957)	GNG7;GNG7	5'UTR;5'UTR	139940;158943	Island
	cg03134395	0.17565	0.0391277	7.15143e-06	0.151471	chr8	11718785	NEIL2 (-50954);GATA4 (+10552)	GATA4;GATA4;GATA4;GATA4;GATA4	Body;Body;Body;Body;Body	14581;14634;41826;14583;14563	OpenSea
	cg06640991	-0.23725	0.0528506	7.15343e-06	0.151471	chr11	104705791	PDGFD (-541684);CASP4 (+263645)				OpenSea
	cg15262886	0.107373	0.0239219	7.17252e-06	0.151471	chr11	1762602	IFITM10 (-12011);ENSG00000250644 (+1330)	CTSD;CTSD;CTSD;CTSD;CTSD;CTSD;CTSD;CTSD;CTSD;CTSD;CTSD;CTSD;ENSG00000250644;ENSG00000250644	5'UTR;5'UTR;5'UTR;TSS200;5'UTR;5'UTR;5'UTR;5'UTR;5'UTR;5'UTR;5'UTR;5'UTR;5'UTR;5'UTR	1329;1326;1326;-198;1972;1326;1326;1347;1340;1305;1295;1363;1331;1353	Shore
	cg06112560	-0.141075	0.0314309	7.17596e-06	0.151471	chr16	23680506	PLK1 (+1684);ERN2 (+32994)	PLK1;PLK1;PLK1;PLK1;PLK1;PLK1	Body;Body;Body;Body;Body;Body	1637;1535;1617;923;774;2850	Shore
	cg03909509	-0.194919	0.0435249	7.52266e-06	0.151471	chr2	100820725	NPAS2 (+573)	NPAS2;NPAS2	Body;TSS1500	586;-300	Island
	cg25371672	-0.196173	0.0438316	7.61956e-06	0.151471	chr10	128623930	MGMT (-843254);MKI67 (-497545)				OpenSea
	cg01655777	0.171984	0.0384417	7.68124e-06	0.151471	chr14	105419708	MTA1 (-114)	MTA1;MTA1;MTA1;MTA1;MTA1;MTA1;MTA1-DT;MTA1-DT;MTA1-DT;MTA1-DT;TEX22	TSS1500;TSS1500;TSS200;TSS1500;TSS200;TSS200;5'UTR;5'UTR;TSS1500;TSS1500;Body	-308;-311;-119;-230;-184;-112;32;32;-636;-627;21129	Island
	cg13462576	-0.121562	0.0272536	8.18095e-06	0.155493	chr15	74434179	SEMA7A (+288)	SEMA7A;SEMA7A;SEMA7A	TSS1500;TSS1500;TSS1500	-220;-474;-223	Shore
	cg06761220	0.210036	0.0472651	8.83879e-06	0.155493	chr2	238169449	ERFE (+10441);ILKAP (+34280)				OpenSea
	cg14760714	-0.154492	0.0347689	8.85535e-06	0.155493	chr15	40569230	CCDC32 (-4250);RPUSD2 (-70)	RPUSD2;RPUSD2;RPUSD2	TSS200;TSS200;TSS1500	-69;-102;-207	Island
	cg14537507	0.244441	0.0550574	9.00613e-06	0.155493	chr5	131635036	RAPGEF6 (+75)	ENSG00000273217;RAPGEF6;RAPGEF6;RAPGEF6;RAPGEF6;RAPGEF6;RAPGEF6;RAPGEF6	5'UTR;5'UTR;5'UTR;TSS200;5'UTR;5'UTR;5'UTR;5'UTR	161948;178;76;-5;177;194;196;124	Island
	cg21534666	-0.0895152	0.0201721	9.09811e-06	0.155493	chr11	17514033	ABCC8 (-37188);USH1C (+30274)	USH1C;USH1C;USH1C;USH1C;USH1C;USH1C	5'UTR;5'UTR;5'UTR;5'UTR;5'UTR;5'UTR	30370;2590;30384;30384;30368;19478	OpenSea
	cg19424261	0.240914	0.0542953	9.11751e-06	0.155493	chr10	129958463	EBF3 (+5378);MGMT (+491279)	EBF3;EBF3;EBF3;EBF3;EBF3	5'UTR;5'UTR;5'UTR;5'UTR;5'UTR	1322;5256;5812;14591;5812	Island
	cg16687842	0.183292	0.0413549	9.32899e-06	0.155493	chr12	122395409	VPS33A (-128888);CLIP1 (+27160)	CLIP1;CLIP1;CLIP1;CLIP1;CLIP1;CLIP1;CLIP1;CLIP1;CLIP1-AS1;CLIP1-AS1	5'UTR;5'UTR;5'UTR;5'UTR;5'UTR;5'UTR;5'UTR;5'UTR;TSS200;TSS200	27161;27180;4606;27224;27204;19;27261;589;-197;-133	OpenSea
	cg15144828	0.235295	0.0531443	9.53407e-06	0.155493	chr10	65891321	un-named				OpenSea
	cg15601071	0.177198	0.0400282	9.5636e-06	0.155493	chr6	30110303	RNF39 (-34416);TRIM31 (+2803)	TRIM31;TRIM31;TRIM31;TRIM31-AS1	5'UTR;5'UTR;5'UTR;Body	1884;2788;1404;5063	OpenSea
	cg10471512	-0.155734	0.0351941	9.64426e-06	0.155493	chr6	169427435	THBS2 (-173391);WDR27 (+274218)	ENSG00000272848;ENSG00000285733;ENSG00000285733	1stExon;5'UTR;5'UTR	25041;274224;274613	OpenSea
	cg08291553	0.293874	0.0664997	9.9079e-06	0.155493	chr5	96651151	PCSK1 (-217871);CAST (-11086)	CAST	Body	121330	OpenSea

## Sheet: S2
	Supplementary Table 2 Differentially methylated regions (DMRs) associated with Resilience Index. The P-values from individual CpGs analysis were used as input for the comb-p software. A total of 24 DMRs had consistent direction of changes in all the CpGs within the DMR, P-value < 10-5, and Sidak multiple comparison adjusted P-value less than 0.05. Annotations was based on the GREAT software, wher…
	DMR	width	n_probes	P-value	Sidak-P	direction	cpgs_in_region	GREAT_annotation	Relation_to_Island
	chr2:240623007-240623931	925	6	2.707e-12	2.6e-09	++++++	cg14927745,cg20428033,cg21093020,cg11002208,cg26250154,cg01484134	GPR35 (+4526);AQP12B (+59431)	Island;Shore
	chr19:2543604-2544103	500	5	6.94e-12	1.234e-08	-----	cg01617139,cg08481112,cg00925020,cg23854103,cg05340882	GADD45B (+67726);GNG7 (+158856)	Island;Shore
	chr5:179559290-179559830	541	12	1.101e-09	1.809e-06	------------	cg05457628,cg02136620,cg09060608,cg06118287,cg00080972,cg14820908,cg21226059,cg22764044,cg08058472,cg20199595,cg01955137,cg25658438	RUFY1 (+9002);HNRNPH1 (+65109)	Island;Shore
	chr19:44945836-44946045	210	6	8.867e-09	3.765e-05	++++++	cg13119609,cg10872931,cg22294278,cg01958934,cg09555818,cg05134567	APOC2 (-1263)	OpenSea
	chr15:72685411-72685700	290	5	1.351e-08	4.149e-05	+++++	cg12188424,cg20727290,cg00398637,cg11658652,cg25924688	BBS4 (-632);HIGD2B (+594)	Shore
	chr12:109131254-109131376	123	5	4.157e-08	0.0003023	+++++	cg16797699,cg26872224,cg20025086,cg00095930,cg26010350	ACACB (+14720);FOXN4 (+177905)	OpenSea
	chr7:726222-726483	262	4	6.57e-08	0.0002233	----	cg11064039,cg05729249,cg06242242,cg10273382	DNAAF5 (-349)	Island;Shore
	chr8:57143317-57143617	301	4	9.41e-08	0.0002783	----	cg08677398,cg11062466,cg21724239,cg08219700	FAM110B (-851087);IMPAD1 (-149623)	Island
	chr12:96906632-96906726	95	4	1.702e-07	0.001606	----	cg11021222,cg15621458,cg21721825,cg21233257	NEDD1 (-787)	Shore
	chr5:191432-191692	261	5	2.3e-07	0.0007846	-----	cg19858576,cg12711961,cg15730313,cg13787932,cg26866348	SDHA (-26679);PLEKHG4B (+51304)	Island;Shore
	chr16:1772123-1772346	224	4	2.873e-07	0.001142	----	cg09540102,cg19030554,cg16445708,cg16466831	EME2 (-973);NME3 (-504);MRPS34 (+916)	Island
	chrX:150983099-150983351	253	11	2.997e-07	0.001055	+++++++++++	cg06136002,cg05935584,cg01807728,cg12284142,cg22191603,cg05905814,cg05379196,cg25714218,cg25685741,cg00963467,cg20662859	HMGB3 (-61)	Island
	chr8:144270483-144270716	234	6	3.735e-07	0.001422	------	cg13304396,cg13304403,cg13304399,cg13304398,cg13304395,cg13304388	SCX (+4039);BOP1 (+20771)	Island
	chr7:2249081-2249215	135	4	4.231e-07	0.002798	++++	cg13550401,cg10738933,cg12480772,cg20076627	NUDT1 (+6887);SNX8 (+65316)	OpenSea
	chr3:52778345-52778505	161	5	1.094e-06	0.006049	+++++	cg00748195,cg25938530,cg19784816,cg05283597,cg03062429	ITIH1 (+833)	OpenSea
	chr1:164576462-164576630	169	5	1.196e-06	0.006299	+++++	cg18181229,cg26326527,cg20682146,cg00222472,cg06674791	PBX1 (+16911);LMX1A (+780169)	Island
	chr16:88956981-88957226	246	3	2.159e-06	0.00779	+++	cg02431972,cg08732950,cg05953373	PABPN1L (-90485);CBFA2T3 (+20101)	OpenSea
	chr15:23039667-23039919	253	9	2.202e-06	0.007724	---------	cg17121412,cg06756169,cg16639637,cg17809365,cg16707215,cg24525828,cg07959104,cg20113284,cg18106434	TUBGCP5 (-120)	Island;Shore
	chr1:203765128-203765378	251	6	3.524e-06	0.01243	------	cg01842185,cg12022621,cg10117369,cg06958535,cg17711527,cg16948489	LAX1 (+77)	OpenSea
	chr1:3352688-3352915	228	3	4.211e-06	0.01633	+++	cg01101873,cg06060874,cg27187555	ARHGEF16 (-101625);PRDM16 (+283590)	OpenSea
	chr17:40560954-40561042	89	4	5.001e-06	0.04918	----	cg07248223,cg16047279,cg22525159,cg26960939	TNS4 (-59401);CCR7 (+4474)	OpenSea
	chr6:33080514-33080984	471	8	6.648e-06	0.01247	+++++++++++	cg06437840,cg25511667,cg19990651,cg10850215,cg15829535,cg25045942,cg03229061,cg14801692,cg26645432,cg13581859,cg17588455	HLA-DPA1 (-39)	Island;Shore
	chr6:70283625-70283862	238	3	8.356e-06	0.0308	---	cg04487479,cg00335424,cg25142479	COL9A1 (+19340);COL19A1 (+417172)	Shore
	chr3:16536035-16536281	247	4	9.296e-06	0.03298	++++	cg11492723,cg06213060,cg14320320,cg25146434	RFTN1 (-22452);DAZL (+68632)	OpenSea

## Sheet: S3
	Supplmentary Table 3 Genes associated with significant pathways identified by methylGSA (PMID: 30346483). At 5% FDR, a total of 11 KEGG pathways and 10 Reactome pathways were significantly enriched with Resilience Index-associated CpGs.
	Pathway	Size	pValue	FDR	Core enrichment genes
	KEGG pathways
	HYPERTROPHIC_CARDIOMYOPATHY_HCM	78	5.01182e-06	0.000907139	TNNI3/CACNA1F/MYH6/PRKAA1/CACNG8/TNNC1/CACNB2/SGCA/ITGA9/TGFB1/ITGA2B/PRKAG2/ACTB/CACNA1C/ACTC1/ITGB6
	DILATED_CARDIOMYOPATHY	85	1.0351e-05	0.000936766	TNNI3/CACNA1F/ADCY7/MYH6/CACNG8/TNNC1/CACNB2/SGCA/ADCY1/ITGA9/TGFB1/ITGA2B/ACTB/ADRB1/CACNA1C/ACTC1/ITGB6
	UBIQUITIN_MEDIATED_PROTEOLYSIS	128	5.80958e-05	0.00350512	HUWE1/UBOX5/MDM2/UBE4B/UBE2F/KLHL9/UBE3B/ERCC8/UBA3/MGRN1/SKP2/DET1/UBE2G2/SKP1P2/UBE2N/UBE2U/UBA7/UBE2I/CBL/UBE2D2/STUB1/RCHY1/BTRC/FBXO2/UBE2E1/TRAF6/UBE2Z/RBX1/WWP1/CDC20/UBE2A/CDC23
	AMINOACYL_TRNA_BIOSYNTHESIS	38	0.000166645	0.00754066	EPRS1/MARS1/RARS1/RARS2/CARS2/FARSA/YARS1
	GLYCEROPHOSPHOLIPID_METABOLISM	74	0.000211989	0.00767401	MBOAT1/PLA2G2E/PLPP3/CDS2/GNPAT/CDS1/GPD1/PLA2G12A/PLPP2/DGKE/LPCAT4/MBOAT2/PLA2G2A/PTDSS1/PLA2G10/LPCAT1/PCYT2/CHKA
	GLIOMA	63	0.000307594	0.0084248	MDM2/CAMK2G/CALML6/E2F1/ARAF/CALM2/PIK3R3/RB1/SHC1/PIK3CB/MTOR/PIK3R1
	AXON_GUIDANCE	127	0.000325821	0.0084248	LIMK2/EFNB1/FES/SEMA7A/RAC2/PAK3/UNC5B/NFATC2/EPHB4/NFAT5/SEMA3D/RASA1/EPHA6/MET/ABLIM1/EFNA5/EPHA1/SEMA3A/LIMK1/NCK1/L1CAM/GNAI3/UNC5A/CXCR4/SEMA5B/PLXNA3/SRGAP2/PLXNB2/EPHA5/EFNA2
	CIRCADIAN_RHYTHM_MAMMAL	13	0.00146345	0.0327635	CSNK1E/CRY2/NPAS2/BHLHE40
	ALZHEIMERS_DISEASE	145	0.00162912	0.0327635	COX6B1/GNAQ/IL1B/ERN1/CACNA1F/UQCRC1/NDUFS6/CALML6/UQCRH/UQCRC2/PLCB2/ATP5F1B/NDUFS4/ATP5PF/NDUFS8/ITPR2/PLCB4/NDUFS7/CALM2/NDUFA1/BID/CASP8/PLCB3/BACE2/CACNA1C/COX6C/NDUFV1/NDUFA2/COX4I1/NDUFA5/ITPR1/ITPR3/ADAM17/NDUFS2/ADAM10/SNCA
	ETHER_LIPID_METABOLISM	32	0.00234939	0.042524	PLA2G2E/PLPP3/PLA2G12A/PLPP2/LPCAT4/PLA2G2A/PAFAH1B1/PLA2G10/LPCAT1
	HUNTINGTONS_DISEASE	161	0.00294136	0.0483987	COX6B1/GNAQ/TBPL2/UQCRC1/NDUFS6/UQCRH/UQCRC2/DCTN2/CREB1/PLCB2/NRF1/SIN3A/ATP5F1B/NDUFS4/TBP/SP1/ATP5PF/CREB5/NDUFS8/PLCB4/SLC25A31/NDUFS7/CREB3L3/NDUFA1/CASP8/PLCB3/DCTN1/CREB3L2/DNAL1/SOD2/VDAC1/COX6C/NDUFV1/NDUFA2/COX4I1/NDUFA5/ITPR1/NDUFS2
	Reactome pathways
	RECRUITMENT_OF_MITOTIC_CENTROSOME_PROTEINS_AND_COMPLEXES	78	1.10377e-06	0.00168325	NEDD1/CSNK1E/PLK1/CDK11A/PCM1/TUBGCP5/NINL/CEP41/CEP76/MZT2A/DCTN2/CEP43/HAUS2/HAUS5/PAFAH1B1/TUBG2/TUBA1A/NDE1/CEP131/DCTN1/YWHAG/CETN2
	NR1H2_AND_NR1H3_MEDIATED_SIGNALING	44	0.000119033	0.0302541	APOC2/NRIP1/NCOR2/TNRC6B/NR1H3/TBL1XR1/ABCG8/APOC1/KDM3A/CETP/KDM1A/HDAC3
	AURKA_ACTIVATION_BY_TPX2	70	6.3736e-05	0.0302541	NEDD1/CSNK1E/PLK1/PCM1/NINL/CEP41/CEP76/DCTN2/CEP43/HAUS2/HAUS5/PAFAH1B1/TUBA1A/NDE1/CEP131/DCTN1/YWHAG/CETN2
	ANCHORING_OF_THE_BASAL_BODY_TO_THE_PLASMA_MEMBRANE	95	0.000119033	0.0302541	NEDD1/CSNK1E/PLK1/CEP162/NPHP4/PCM1/NINL/CEP41/CEP83/CEP76/DCTN2/CEP43/HAUS2/HAUS5/PAFAH1B1/TUBA1A/NDE1/CEP131/DCTN1/YWHAG/CETN2
	CARDIAC_CONDUCTION	119	7.16323e-05	0.0302541	TNNI3/CAMK2G/SCN11A/KCNK1/CASQ2/FXYD2/KCNIP4/GATA4/HIPK2/CACNG8/CACNB2/KCNIP2/RYR1/ITPR2/NPR2/SCN3B/NKX2-5/HIPK1/FXYD7/CACNA1C/ATP1B1/KCNE5/KCNJ12/KCNK18/STIM1/ITPR1/ITPR3/KCNIP3
	PLASMA_LIPOPROTEIN_CLEARANCE	33	0.000307594	0.0429008	NR1H3/CES3/PCSK9/APOC1/APOBR
	PLASMA_LIPOPROTEIN_ASSEMBLY_REMODELING_AND_CLEARANCE	71	0.000239241	0.0429008	APOC2/NR1H3/MBTPS2/CES3/PCSK9/APOC1/APOA5/CREB3L3/GPIHBP1/CIDEC/APOBR/CETP/APOF
	REGULATION_OF_INSULIN_SECRETION	73	0.000284809	0.0429008	GNG7/STX1A/GNAQ/INS/GNG2/FFAR1/PLCB2/CACNB2/ITPR2/RAPGEF3/ACSL3/RAP1A/PLCB3/CHRM3/GNG8/CACNA1C/GNB5/ITPR1/ITPR3
	CILIUM_ASSEMBLY	193	0.000289366	0.0429008	BBS4/NEDD1/CSNK1E/PLK1/TCP1/LZTFL1/IFT46/CEP162/RP2/CNGB1/NPHP4/CYS1/PCM1/NINL/CEP41/CEP83/CEP76/BBS7/DCTN2/CEP43/HAUS2/HAUS5/EXOC3/NPHP3/ARL3/PAFAH1B1/EXOC6/BBS1/IFT74/TUBA1A/RHO/NDE1/IFT22/KIF3A/CEP131/IFT172/DCTN1/ARL13B/YWHAG/UNC119B/CCT4/CETN2/KIF3B/TRAF3IP1/IFT20/TUBA1C/CC2D2A/HAUS6/IFT88/BBIP1/DYNLRB2/TUBB2B/CCT8/DYNLT5/IFT52/PKD1/B9D1/PPP2R1A/TUBA8/TCTN2/BBS2/PDE6D/TUBB8
	CREB1_PHOSPHORYLATION_THROUGH_NMDA_RECEPTOR_MEDIATED_ACTIVATION_OF_RAS_SIGNALING	28	0.000407845	0.0478433	CAMK2G/PDPK1/RPS6KA3/CREB1/LRRC7

## Sheet: S4
	Supplementary Table 4 A total of 29 Resilience Index-associated CpGs were significantly associated with gene expression levels of nearby gene in cis. The eQTm results (i.e., DNAm to RNA associations) were obtained from Yao et al. (2021) (PMID: 33752734). In GREAT annotation, the numbers in parentheses indicate the distance from the TSS.
		Annotations for CpGs				Target gene and transcript				CpG-to-Transcript association
	significant individual CpG
	CpG	chr	position	GREAT_annotation	Relation_to_Island	GeneSymbol	transcript-chr	transcript-start	transcript-end	T value	log10P
	cg08720250	chr12	107243448	CRY1 (-149619);BTBD11 (-74965)	OpenSea	BTBD11	12	107713695	108053413	5.97025	-8.58609
	CpGs located in DMRs
	CpG	chr	position	GREAT_annotation	Relation_to_Island	GeneSymbol	transcript-chr	transcript-start	transcript-end	T value	log10P
	cg17121412	chr15	23039667	TUBGCP5 (+6)	Island	TUBGCP5	15	22833438	22892272	-8.25753	-15.688
	cg06756169	chr15	23039732	TUBGCP5 (-59)	Island	TUBGCP5	15	22833438	22892272	-7.48827	-13.061
	cg16639637	chr15	23039759	TUBGCP5 (-86)	Island	TUBGCP5	15	22833438	22892272	-7.95988	-14.643
	cg24525828	chr15	23039779	TUBGCP5 (-106)	Island	TUBGCP5	15	22833438	22892272	-6.93936	-11.3339
	cg18106434	chr15	23039819	TUBGCP5 (-146)	Shore	TUBGCP5	15	22833438	22892272	-9.6023	-20.8545
	cg16707215	chr15	23039854	TUBGCP5 (-181)	Shore	TUBGCP5	15	22833438	22892272	-11.8038	-30.8605
	cg17809365	chr15	23039895	TUBGCP5 (-222)	Shore	TUBGCP5	15	22833438	22892272	-12.0983	-32.3421
	cg07959104	chr15	23039918	TUBGCP5 (-245)	Shore	TUBGCP5	15	22833438	22892272	-11.8768	-31.2247
	cg25045942	chr6	33080514	HLA-DPA1 (+196)	Shore	HLA-DPB1	6	33043716	33059415	13.8814	-42.0144
	cg25045942	chr6	33080514	HLA-DPA1 (+196)	Shore	HLA-DPA1	6	33032346	33048555	10.6347	-25.3103
	cg10850215	chr6	33080692	HLA-DPA1 (+18)	Island	HLA-DPB1	6	33043716	33059415	12.4661	-34.2391
	cg10850215	chr6	33080692	HLA-DPA1 (+18)	Island	HLA-DPA1	6	33032346	33048555	9.80045	-21.677
	cg03229061	chr6	33080706	HLA-DPA1 (+4)	Island	HLA-DPB1	6	33043716	33059415	15.5792	-52.3154
	cg03229061	chr6	33080706	HLA-DPA1 (+4)	Island	HLA-DPA1	6	33032346	33048555	11.3615	-28.6984
	cg17588455	chr6	33080708	HLA-DPA1 (+2)	Island	HLA-DPB1	6	33043716	33059415	14.2773	-44.3226
	cg17588455	chr6	33080708	HLA-DPA1 (+2)	Island	HLA-DPA1	6	33032346	33048555	10.6913	-25.5667
	cg26645432	chr6	33080725	HLA-DPA1 (-15)	Island	HLA-DRB1|HLA-DRB6|LOC100507714|LOC100507709	6	32520500	32557601	-5.88521	-8.36336
	cg06437840	chr6	33080752	HLA-DPA1 (-42)	Island	HLA-DPB1	6	33043716	33059415	14.6047	-46.2752
	cg06437840	chr6	33080752	HLA-DPA1 (-42)	Island	HLA-DPA1	6	33032346	33048555	10.2344	-23.5324
	cg19990651	chr6	33080778	HLA-DPA1 (-68)	Island	HLA-DPB1	6	33043716	33059415	13.1753	-38.0413
	cg19990651	chr6	33080778	HLA-DPA1 (-68)	Island	HLA-DPA1	6	33032346	33048555	9.27836	-19.5436
	cg14801692	chr6	33080815	HLA-DPA1 (-105)	Island	HLA-DPB1	6	33043716	33059415	15.6484	-52.7572
	cg14801692	chr6	33080815	HLA-DPA1 (-105)	Island	HLA-DPA1	6	33032346	33048555	8.93676	-18.2067
	cg13581859	chr6	33080929	HLA-DPA1 (-219)	Island	HLA-DPB1	6	33043716	33059415	10.9982	-26.9792
	cg13581859	chr6	33080929	HLA-DPA1 (-219)	Island	HLA-DPA1	6	33032346	33048555	6.17585	-9.13683
	cg25511667	chr6	33080955	HLA-DPA1 (-245)	Island	HLA-DPB1	6	33043716	33059415	14.5053	-45.6778
	cg25511667	chr6	33080955	HLA-DPA1 (-245)	Island	HLA-DPA1	6	33032346	33048555	10.1132	-23.0068
	cg15829535	chr6	33080983	HLA-DPA1 (-273)	Island	HLA-DPB1	6	33043716	33059415	13.5293	-40.0101
	cg15829535	chr6	33080983	HLA-DPA1 (-273)	Island	HLA-DPA1	6	33032346	33048555	10.8678	-26.3745
	cg01958934	chr19	44945842	APOC2 (-1361)	OpenSea	CLPTM1	19	45457879	45496587	8.33248	-15.9568
	cg13119609	chr19	44946040	APOC2 (-1163)	OpenSea	CLPTM1	19	45457879	45496587	7.33993	-12.5821
	cg09555818	chr19	44946044	APOC2 (-1159)	OpenSea	CLPTM1	19	45457879	45496587	8.72123	-17.3873
	cg00080972	chr5	179559290	RUFY1 (+8732);HNRNPH1 (+65379)	Shore	RUFY1	5	178977571	179037001	-6.33752	-9.58209
	cg21226059	chr5	179559403	RUFY1 (+8845);HNRNPH1 (+65266)	Shore	RUFY1	5	178977571	179037001	-6.83211	-11.0109
	cg14820908	chr5	179559411	RUFY1 (+8853);HNRNPH1 (+65258)	Shore	RUFY1	5	178977571	179037001	-6.35718	-9.63696
	cg02136620	chr5	179559619	RUFY1 (+9061);HNRNPH1 (+65050)	Island	RUFY1	5	178977571	179037001	-6.03154	-8.74844
	cg09060608	chr5	179559725	RUFY1 (+9167);HNRNPH1 (+64944)	Island	RUFY1	5	178977571	179037001	-6.60865	-10.3529
	cg05457628	chr5	179559727	RUFY1 (+9169);HNRNPH1 (+64942)	Island	RUFY1	5	178977571	179037001	-6.63615	-10.4328

## Sheet: S5
	Supplementary Table 5 A total of 8 RI-associated CpGs were significantly associated with gene expression levels of genes in trans. The eQTm results (i.e., DNAm to RNA associations) were obtained from Yao et al. (2021) (PMID: 33752734). In GREAT annotation, the numbers in parentheses indicate the distance from the TSS.
		Annotations for CpG				Target gene and transcript				CpG-to-transcript association
	significant individual CpGs
	CpG	chr	position	GREAT_annotation	Relation_to_Island	GeneSymbol	transcript-chr	transcript-start	transcript-end	T value	log10P
	cg26108120	chr3	72391642	PROK2 (-606581);RYBP (+54979)	OpenSea	CR2	1	207627595	207663229	7.55634	-13.2837
	cg26108120	chr3	72391642	PROK2 (-606581);RYBP (+54979)	OpenSea	FCRL1	1	157764196	157789903	10.3623	-24.0938
	cg26108120	chr3	72391642	PROK2 (-606581);RYBP (+54979)	OpenSea	SCN3A	2	165911652	166060598	7.63675	-13.5493
	cg26108120	chr3	72391642	PROK2 (-606581);RYBP (+54979)	OpenSea	TAPT1|FLJ39653	4	16162922	16324612	7.99635	-14.7691
	cg26108120	chr3	72391642	PROK2 (-606581);RYBP (+54979)	OpenSea	LIX1	5	96427575	96478576	8.95947	-18.2942
	cg26108120	chr3	72391642	PROK2 (-606581);RYBP (+54979)	OpenSea	COL19A1	6	70576431	70922160	10.2284	-23.5067
	cg26108120	chr3	72391642	PROK2 (-606581);RYBP (+54979)	OpenSea	BACH2	6	90636254	91006461	8.03868	-14.9162
	cg26108120	chr3	72391642	PROK2 (-606581);RYBP (+54979)	OpenSea	PTPRK	6	128289859	128841831	9.58321	-20.7761
	cg26108120	chr3	72391642	PROK2 (-606581);RYBP (+54979)	OpenSea	TSPAN13	7	16793149	16824259	9.08869	-18.7955
	cg26108120	chr3	72391642	PROK2 (-606581);RYBP (+54979)	OpenSea	CDCA7L	7	21940531	22056557	7.22351	-12.2126
	cg26108120	chr3	72391642	PROK2 (-606581);RYBP (+54979)	OpenSea	CD72	9	35609970	35646790	7.45558	-12.9547
	cg26108120	chr3	72391642	PROK2 (-606581);RYBP (+54979)	OpenSea	TCL1A|LOC100133207	14	96087246	96259939	10.3256	-23.9321
	cg26108120	chr3	72391642	PROK2 (-606581);RYBP (+54979)	OpenSea	ABCA6	17	67073888	67138128	-8.70202	-17.3152
	cg26108120	chr3	72391642	PROK2 (-606581);RYBP (+54979)	OpenSea	CD22	19	35821091	35838261	7.43257	-12.8801
	cg26108120	chr3	72391642	PROK2 (-606581);RYBP (+54979)	OpenSea	CD79A	19	42381187	42385432	8.52978	-16.6752
	cg26108120	chr3	72391642	PROK2 (-606581);RYBP (+54979)	OpenSea	LARGE	22	33668857	34318672	8.68813	-17.2632
	cg14456683	chr3	147409223	ZIC4 (-4939);ZIC1 (-161)	Island	COL19A1	6	70576431	70922160	-7.25176	-12.3018
	cg06761220	chr2	238169449	ERFE (+10441);ILKAP (+34280)	OpenSea	LINC00299	2	8147901	8468539	-9.68198	-21.1834
	cg06761220	chr2	238169449	ERFE (+10441);ILKAP (+34280)	OpenSea	SH2D1B	1	162365056	162381923	-12.3713	-33.7454
	cg06761220	chr2	238169449	ERFE (+10441);ILKAP (+34280)	OpenSea	KLRF1	12	9980077	9997604	-10.0854	-22.8871
	cg06761220	chr2	238169449	ERFE (+10441);ILKAP (+34280)	OpenSea	ADAMTS1	21	28208079	28219697	-9.69662	-21.2441
	cg08720250	chr12	107243448	CRY1 (-149619);BTBD11 (-74965)	OpenSea	AIM2	1	159032287	159141142	-7.4204	-12.8408
	cg08720250	chr12	107243448	CRY1 (-149619);BTBD11 (-74965)	OpenSea	LIX1	5	96427575	96478576	8.56359	-16.7999
	cg08720250	chr12	107243448	CRY1 (-149619);BTBD11 (-74965)	OpenSea	COL19A1	6	70576431	70922160	7.42982	-12.8712
	cg08720250	chr12	107243448	CRY1 (-149619);BTBD11 (-74965)	OpenSea	ABCA6	17	67073888	67138128	-7.87009	-14.3348
	CpGs located in DMRs
	CpG	chr	position	GREAT_annotation	Relation_to_Island	GeneSymbol	transcript-chr	transcript-start	transcript-end	T value	log10P
	cg07248223	chr17	40561023	TNS4 (-59426);CCR7 (+4449)	OpenSea	TCL1A|LOC100133207	14	96087246	96259939	-7.57342	-13.3399
	cg16047279	chr17	40560990	TNS4 (-59393);CCR7 (+4482)	OpenSea	FCRL1	1	157764196	157789903	-8.2425	-15.6344
	cg16047279	chr17	40560990	TNS4 (-59393);CCR7 (+4482)	OpenSea	TCL1A|LOC100133207	14	96087246	96259939	-8.03592	-14.9066
	cg16047279	chr17	40560990	TNS4 (-59393);CCR7 (+4482)	OpenSea	CD22	19	35821091	35838261	-7.69426	-13.7409
	cg19784816	chr3	52778504	ITIH1 (+912)	OpenSea	SH2D1B	1	162365056	162381923	-11.678	-30.2382
	cg19784816	chr3	52778504	ITIH1 (+912)	OpenSea	CD247	1	167382050	167502777	-7.15778	-12.0064
	cg19784816	chr3	52778504	ITIH1 (+912)	OpenSea	LINC00299	2	8147901	8468539	-8.5474	-16.7401
	cg19784816	chr3	52778504	ITIH1 (+912)	OpenSea	NCAM1	11	112831988	113149148	-8.01641	-14.8387
	cg19784816	chr3	52778504	ITIH1 (+912)	OpenSea	KLRF1	12	9980077	9997604	-10.9287	-26.656
	cg19784816	chr3	52778504	ITIH1 (+912)	OpenSea	RNF165	18	43906783	44042348	-7.68088	-13.6962
	cg19784816	chr3	52778504	ITIH1 (+912)	OpenSea	IL2RB	22	37513228	37554917	-8.46988	-16.4554
	cg26960939	chr17	40560954	TNS4 (-59357);CCR7 (+4518)	OpenSea	FCRL1	1	157764196	157789903	-7.57266	-13.3374
	cg26960939	chr17	40560954	TNS4 (-59357);CCR7 (+4518)	OpenSea	COL19A1	6	70576431	70922160	-7.79943	-14.0946
	cg26960939	chr17	40560954	TNS4 (-59357);CCR7 (+4518)	OpenSea	TCL1A|LOC100133207	14	96087246	96259939	-9.37043	-19.9119

## Sheet: S6
	Supplementary 6 The blood mQTLs were obtained by overlapping Reslience Index-associated CpGs with the GoDMC database (PMID: 34493871). We searched for mQTLs for CpGs mapped to the 56 Resilience Index-associated CpGs (Supplementary Table 1), and 134 CpGs located in Resilience Index associated-DMRs in blood samples analysis (Supplementary Table 2). We identified a total of 102,690 significant mQTL …
	CpG-SNP	Annotations for CpGs							Annotations for SNPs			Blood mQTLs
		CpG	UCSC_RefGene_Group	UCSC_RefGene_Accession	UCSC_RefGene_Name	Relation_to_Island	chr	position	SNP	SNPid	cpg_SNP_distance	beta_a1	se	pval	samplesize	allele1	allele2	freq_a1	freq_se	cistrans	num_studies	direction	hetisq	hetchisq	hetpval	tausq	beta_are_a1	se_are	pval_are	se_mre	pval_mre	chunk	clumped	sig
	cg18181229-chr1:164695090:SNP	cg18181229				Island	chr1	164545699	chr1:164695090:SNP	rs1489330	149391	-0.11503	0.0096019	4.53e-33	26747	T	G	0.2827	0.0319	TRUE	34	--+-----+--+-+---+-----??------+---+	66.7	99.1963	1.52e-08	0.0063831	-0.112564	0.01759	1.56e-10	0.0288628	6.74e-05	657	FALSE	1
	cg18181229-chr1:164693216:SNP	cg18181229				Island	chr1	164545699	chr1:164693216:SNP	rs1489328	147517	-0.121883	0.0095213	1.62e-37	24994	G	A	0.3274	0.0283	TRUE	33	+++++++?-?+++++++-++++++?++++++-++++	68	100.055	6.235e-09	0.0064611	-0.120054	0.0177542	1.36e-11	0.0297707	4.24e-05	657	FALSE	1
	cg18181229-chr1:164587092:SNP	cg18181229				Island	chr1	164545699	chr1:164587092:SNP	rs2800783	41393	0.08131	0.0086498	5.44e-21	26457	T	C	0.4872	0.0157	TRUE	34	+-++-++?+++-+++++-++-+++?++++++++-++	56.6	76.0673	2.988e-05	0.0033646	0.0859161	0.0138334	5.27e-10	0.0199383	4.54e-05	657	FALSE	1
	cg18181229-chr1:164694347:SNP	cg18181229				Island	chr1	164545699	chr1:164694347:SNP	rs78063288	148648	-0.108453	0.010146	1.14e-26	26738	T	C	0.2422	0.0295	TRUE	34	--+----------+---+-----??------+---+	59.7	81.8531	4.946e-06	0.0052613	-0.105045	0.0169391	5.6e-10	0.0251661	1.64e-05	657	FALSE	1
	cg18181229-chr1:164602455:SNP	cg18181229				Island	chr1	164545699	chr1:164602455:SNP	rs1770551	56756	0.0778004	0.0089382	3.2e-18	24827	T	C	0.4909	0.0181	TRUE	31	+-++-++?+++-+++++-?+-++??++?+++++-++	56.2	68.5315	7.614e-05	0.0032292	0.0826358	0.0142748	7.08e-09	0.0204182	0.0001388	657	FALSE	1
	cg18181229-chr1:164568606:SNP	cg18181229				Island	chr1	164545699	chr1:164568606:SNP	rs2792253	22907	0.0851135	0.0085584	2.65e-23	27750	G	A	0.4335	0.0167	TRUE	36	-+--------------+---+---+-----------	37.7	56.1474	0.01313	0.0016123	0.0874881	0.0113375	1.19e-14	0.0137295	5.67e-10	657	FALSE	1
	cg18181229-chr1:164597402:SNP	cg18181229				Island	chr1	164545699	chr1:164597402:SNP	rs1780339	51703	-0.115116	0.0102322	2.31e-29	22925	A	T	0.2884	0.0224	TRUE	30	-+--+--?-?-+------?-+--??--------?+-	53.9	62.8644	0.0002684	0.0037312	-0.111709	0.0159595	2.57e-12	0.0221808	2.1e-07	657	FALSE	1
	cg18181229-chr1:164702044:SNP	cg18181229				Island	chr1	164545699	chr1:164702044:SNP	rs7518582	156345	-0.102217	0.009452	2.95e-27	27749	G	T	0.2812	0.0258	TRUE	36	+++++++++++++++++-+++++++++++++-+++-	61	89.7643	1.061e-06	0.0051005	-0.0983271	0.0159797	7.59e-10	0.0242415	2.48e-05	657	FALSE	1
	cg18181229-chr1:164699085:INDEL	cg18181229				Island	chr1	164545699	chr1:164699085:INDEL	chr1.164699085	153386	-0.118628	0.0107797	3.62e-28	23767	D	I	0.242	0.0328	TRUE	31	--+--+-?-?---+---+-----??------?---+	59.9	74.8195	1.067e-05	0.0054817	-0.113978	0.0181271	3.22e-10	0.0268844	1.02e-05	657	FALSE	1
	cg18181229-chr1:164586284:SNP	cg18181229				Island	chr1	164545699	chr1:164586284:SNP	rs2792258	40585	0.0811688	0.0086519	6.5e-21	26459	G	A	0.4877	0.0161	TRUE	34	-+--+--?---+-----+--+---?-----------	56.2	75.3589	3.705e-05	0.0033108	0.085939	0.0137717	4.37e-10	0.0197575	3.99e-05	657	FALSE	1
	cg18181229-chr1:164683116:SNP	cg18181229				Island	chr1	164545699	chr1:164683116:SNP	rs10494420	137417	-0.115446	0.0107425	6.14e-27	25025	A	G	0.2258	0.0278	TRUE	32	--+----?-----+----+?---??------+---+	60.2	77.813	6.711e-06	0.0056721	-0.115069	0.0180893	2e-10	0.0269646	1.86e-05	657	FALSE	1
	cg18181229-chr1:164688699:SNP	cg18181229				Island	chr1	164545699	chr1:164688699:SNP	rs6703521	143000	-0.0952342	0.0088506	5.3e-27	27244	A	T	0.3738	0.0205	TRUE	35	-----------------++-----?------+----	60.1	85.2057	2.78e-06	0.004183	-0.0955762	0.0147517	9.23e-11	0.0221799	1.76e-05	657	FALSE	1
	cg18181229-chr1:164589176:SNP	cg18181229				Island	chr1	164545699	chr1:164589176:SNP	rs2792257	43477	0.0816578	0.0089151	5.21e-20	24998	T	C	0.4875	0.0159	TRUE	33	+-++-++?+?+-+++++-++-+++?++++++++-++	57.6	75.5108	2.239e-05	0.0036174	0.0868653	0.014424	1.72e-09	0.0210371	0.0001038	657	FALSE	1
	cg18181229-chr1:164585534:INDEL	cg18181229				Island	chr1	164545699	chr1:164585534:INDEL	chr1.164585534	39835	0.0815329	0.0090445	1.98e-19	24276	D	I	0.4882	0.0159	TRUE	32	+-++-++?+?+-+++++-++-+++?++++++?++++	58.8	75.1996	1.539e-05	0.0037889	0.0866663	0.01486	5.47e-09	0.0219402	0.0002023	657	FALSE	1
	cg18181229-chr1:164697528:SNP	cg18181229				Island	chr1	164545699	chr1:164697528:SNP	rs6667485	151829	-0.0904845	0.0087312	3.64e-25	27244	C	T	0.3951	0.0217	TRUE	35	+++++++-+++++++++--+++++?++++++-++++	57.3	79.5352	1.636e-05	0.0036193	-0.0899578	0.0140562	1.56e-10	0.0204247	9.42e-06	657	FALSE	1
	cg18181229-chr1:164687117:SNP	cg18181229				Island	chr1	164545699	chr1:164687117:SNP	rs1489332	141418	-0.0948933	0.0088481	7.79e-27	27234	C	T	0.3742	0.0208	TRUE	35	+++++++-+++++++++--+++++?++++++-++++	60.1	85.1823	2.8e-06	0.0041788	-0.0951541	0.0147458	1.1e-10	0.0221676	1.86e-05	657	FALSE	1
	cg18181229-chr1:164591529:INDEL	cg18181229				Island	chr1	164545699	chr1:164591529:INDEL	chr1.164591529	45830	-0.101309	0.0106399	1.71e-21	24276	D	I	0.2378	0.0197	TRUE	32	-+--+--?-?-+--------+---?------?-++-	49.3	61.0911	0.001002	0.0035704	-0.0990933	0.015778	3.38e-10	0.0209678	1.35e-06	657	FALSE	1
	cg18181229-chr1:164699722:SNP	cg18181229				Island	chr1	164545699	chr1:164699722:SNP	rs1038679	154023	-0.103726	0.0095396	1.55e-27	27252	G	T	0.2815	0.0255	TRUE	35	++-+++++++++++++++++++++?++++++-+++-	62.2	89.9823	5.935e-07	0.005317	-0.100488	0.0163889	8.71e-10	0.0252468	3.98e-05	657	FALSE	1
	cg18181229-chr1:164546160:SNP	cg18181229				Island	chr1	164545699	chr1:164546160:SNP	rs13375650	461	0.194183	0.0107922	2.21e-72	16933	T	A	0.4512	0.0392	TRUE	25	------??-?--?-----?---?-?-??---?-?--	75.5	98.1144	6.288e-11	0.0091384	0.191993	0.0228933	5.01e-17	0.0441194	1.08e-05	657	FALSE	1
	cg18181229-chr1:164578817:SNP	cg18181229				Island	chr1	164545699	chr1:164578817:SNP	rs2800787	33118	0.0834214	0.0085266	1.32e-22	27257	G	A	0.4888	0.016	TRUE	35	-+--+------+-----+--+---?-----------	53.1	72.554	0.0001309	0.0029221	0.088497	0.0130991	1.42e-11	0.0181953	4.55e-06	657	FALSE	1
	cg18181229-chr1:164578242:SNP	cg18181229				Island	chr1	164545699	chr1:164578242:SNP	rs2800789	32543	0.0825929	0.0085309	3.61e-22	27242	C	A	0.4913	0.0163	TRUE	35	-+---------+-----+--+---?-----------	51.1	69.5376	0.0003089	0.0026961	0.0878464	0.012826	7.43e-12	0.0174475	2.2e-06	657	FALSE	1
	cg18181229-chr1:164685869:SNP	cg18181229				Island	chr1	164545699	chr1:164685869:SNP	rs12733532	140170	-0.0928693	0.0087792	3.75e-26	27699	A	T	0.3736	0.0202	TRUE	36	-----------------++-----+------+----	63.4	95.6327	1.553e-07	0.0048682	-0.092003	0.015261	1.65e-09	0.0239878	0.0001082	657	FALSE	1
	cg18181229-chr1:164533643:SNP	cg18181229				Island	chr1	164545699	chr1:164533643:SNP	rs3898199	12056	0.191047	0.0108165	8.15e-70	16935	T	G	0.4497	0.0399	TRUE	25	++++++??+?++?+++++?+++?+?+??+++?+?++	76.3	101.151	1.91e-11	0.0095575	0.192258	0.0232901	1.52e-16	0.0455878	2.78e-05	657	FALSE	1
	cg18181229-chr1:164569386:INDEL	cg18181229				Island	chr1	164545699	chr1:164569386:INDEL	chr1.164569386	23687	0.0873614	0.0091539	0	24276	D	I	0.4354	0.0163	TRUE	32	+-+++++?+?++++++-+++-+++?++++++?++++	43.6	54.932	0.00509	0.0021003	0.090666	0.0128203	1.53e-12	0.0162207	7.21e-08	657	TRUE	1
	cg18181229-chr1:164698065:SNP	cg18181229				Island	chr1	164545699	chr1:164698065:SNP	rs34067694	152366	-0.107916	0.0101671	2.56e-26	26740	G	A	0.2409	0.0318	TRUE	34	++-++-+++++++-+++-+++++??++++++-+++-	61.2	85.0892	1.752e-06	0.0056338	-0.104047	0.0173151	1.87e-09	0.0262154	3.85e-05	657	FALSE	1
	cg18181229-chr1:164589931:SNP	cg18181229				Island	chr1	164545699	chr1:164589931:SNP	rs1780356	44232	0.0804308	0.0089147	1.84e-19	24997	C	T	0.485	0.0174	TRUE	33	-+--+--?-?-+-----+--+---?--------+--	57.3	74.9565	2.657e-05	0.0035712	0.0862222	0.0143735	1.99e-09	0.0208817	0.0001173	657	FALSE	1
	cg18181229-chr1:164601072:SNP	cg18181229				Island	chr1	164545699	chr1:164601072:SNP	rs1620861	55373	0.0759317	0.008705	2.72e-18	26141	G	A	0.4876	0.019	TRUE	33	-+--+------+-----+?-+--?+--?-----+--	55.6	72.0276	6.475e-05	0.0031712	0.0798735	0.0137633	6.5e-09	0.0195938	0.0001065	657	FALSE	1
	cg18181229-chr1:164537574:INDEL	cg18181229				Island	chr1	164545699	chr1:164537574:INDEL	chr1.164537574	8125	0.206275	0.0133489	7.25e-54	10926	D	I	0.4653	0.0297	TRUE	16	?++??+????++?++?++?+???+?+???++???++	77.5	66.7802	1.662e-08	0.0100993	0.205673	0.0299034	6.07e-12	0.0594295	0.0005187	657	FALSE	1
	cg18181229-chr1:164689615:SNP	cg18181229				Island	chr1	164545699	chr1:164689615:SNP	rs2130166	143916	-0.112669	0.0089846	4.5e-36	27748	A	G	0.3352	0.0215	TRUE	36	--------+--------+------+------+----	66.7	105.192	6.016e-09	0.0059053	-0.110285	0.0163951	1.74e-11	0.0270033	3.01e-05	657	FALSE	1
	cg18181229-chr1:164578236:SNP	cg18181229				Island	chr1	164545699	chr1:164578236:SNP	rs2792259	32537	0.0825435	0.0085306	3.81e-22	27242	G	C	0.4914	0.0164	TRUE	35	-+---------+-----+--+---?-----------	51.2	69.701	0.000295	0.0027084	0.0877731	0.0128406	8.17e-12	0.0174881	2.36e-06	657	FALSE	1
	cg18181229-chr1:164690606:SNP	cg18181229				Island	chr1	164545699	chr1:164690606:SNP	rs6679481	144907	-0.116088	0.0090467	1.08e-37	27247	A	G	0.3385	0.0225	TRUE	35	-----------------+------?------+----	66.6	101.654	1.153e-08	0.0057776	-0.115167	0.0164791	2.78e-12	0.0270479	1.77e-05	657	FALSE	1
	cg18181229-chr1:164691787:SNP	cg18181229				Island	chr1	164545699	chr1:164691787:SNP	rs10753644	146088	-0.115199	0.0090967	9.38e-37	27243	G	A	0.3304	0.0256	TRUE	35	++++++++-++++++++-++++++?++++++-++++	66.8	102.297	9.225e-09	0.005898	-0.113948	0.0166265	7.21e-12	0.0273695	2.57e-05	657	FALSE	1
	cg18181229-chr1:164690183:SNP	cg18181229				Island	chr1	164545699	chr1:164690183:SNP	rs1489331	144484	-0.116178	0.0090452	9.27e-38	27249	G	A	0.3385	0.0226	TRUE	35	++++++++-++++++++-++++++?++++++-++++	67	102.975	7.283e-09	0.0058886	-0.115353	0.0165809	3.48e-12	0.0273951	2.23e-05	657	FALSE	1
	cg18181229-chr1:164577528:SNP	cg18181229				Island	chr1	164545699	chr1:164577528:SNP	rs2792260	31829	0.0832562	0.0085297	1.66e-22	27244	T	C	0.4889	0.016	TRUE	35	+-++-++++++-+++++-++-+++?+++++++++++	53.5	73.0433	0.0001136	0.0029613	0.0884111	0.0131476	1.76e-11	0.0183246	5.54e-06	657	FALSE	1
	cg18181229-chr1:164684187:SNP	cg18181229				Island	chr1	164545699	chr1:164684187:SNP	rs71628346	138488	-0.116606	0.0105624	2.46e-28	25044	G	A	0.2359	0.0235	TRUE	32	+++++++?+++++++++-+?+++??++++++-++--	60.8	79.1293	4.393e-06	0.005635	-0.115375	0.0179207	1.21e-10	0.0269613	1.53e-05	657	FALSE	1
	cg18181229-chr1:164541977:SNP	cg18181229				Island	chr1	164545699	chr1:164541977:SNP	rs2792251	3722	-0.116781	0.0108614	5.8e-27	19197	G	A	0.3237	0.0329	TRUE	27	++++++?+-+++?+++++?++-?+?+??+++?+?-+	43.5	46.0174	0.009081	0.002487	-0.114341	0.0151591	4.6e-14	0.0192236	1.24e-09	657	FALSE	1
	cg18181229-chr1:164684858:SNP	cg18181229				Island	chr1	164545699	chr1:164684858:SNP	rs12089454	139159	-0.0978059	0.0089685	1.08e-27	26471	C	T	0.3747	0.0208	TRUE	34	+++++++?+++++++++--+++++?++++++-++++	60.2	82.9968	3.436e-06	0.0042006	-0.098728	0.014998	4.62e-11	0.0225561	1.45e-05	657	FALSE	1
	cg18181229-chr1:164535555:SNP	cg18181229				Island	chr1	164545699	chr1:164535555:SNP	rs1340521	10144	0.197595	0.0102552	1e-82	19196	C	T	0.4222	0.04	TRUE	27	------?-----?-----?---?-?-??---?-?--	75.4	105.528	1.519e-11	0.0088098	0.196372	0.0216376	1.13e-19	0.0416237	2.06e-06	657	FALSE	1
	cg18181229-chr1:164689762:SNP	cg18181229				Island	chr1	164545699	chr1:164689762:SNP	rs1387389	144063	-0.112151	0.0089838	9.15e-36	27739	A	G	0.3351	0.0214	TRUE	36	--------+--------+------+------+----	67.1	106.538	3.766e-09	0.0060173	-0.109817	0.0164948	2.78e-11	0.0273461	4.11e-05	657	FALSE	1
	cg18181229-chr1:164689650:SNP	cg18181229				Island	chr1	164545699	chr1:164689650:SNP	rs6700017	143951	-0.112605	0.0089836	4.83e-36	27747	T	A	0.3352	0.0214	TRUE	36	++++++++-++++++++-++++++-++++++-++++	66.9	105.637	5.154e-09	0.0059413	-0.110303	0.0164269	1.88e-11	0.0271144	3.28e-05	657	FALSE	1
	cg18181229-chr1:164692909:SNP	cg18181229				Island	chr1	164545699	chr1:164692909:SNP	rs2066087	147210	-0.0970469	0.0088379	4.73e-28	27241	C	T	0.3769	0.0218	TRUE	35	+++++++-+++++++++--+++++?++++++-++++	61.6	88.5565	9.453e-07	0.0044442	-0.0975329	0.0150125	8.21e-11	0.0230191	2.49e-05	657	FALSE	1
	cg18181229-chr1:164568484:SNP	cg18181229				Island	chr1	164545699	chr1:164568484:SNP	rs34572390	22785	-0.0756699	0.0087191	4.01e-18	27235	A	T	0.4255	0.0209	TRUE	35	----------------+---+---?---+----+--	15	40.0174	0.2205	0.0004766	-0.0762276	0.009697	3.81e-15	0.0102622	1.66e-13	657	FALSE	1
	cg18181229-chr1:164563425:SNP	cg18181229				Island	chr1	164545699	chr1:164563425:SNP	rs2800791	17726	0.0872508	0.0087544	2.14e-23	26470	G	A	0.4349	0.0157	TRUE	34	-+-----?--------+---+---?-----------	40.3	55.2388	0.008963	0.0017789	0.0905274	0.0118814	2.55e-14	0.0146541	2.62e-09	657	FALSE	1
	cg18181229-chr1:164687297:SNP	cg18181229				Island	chr1	164545699	chr1:164687297:SNP	rs2347618	141598	-0.11511	0.00906	5.53e-37	27231	C	T	0.3357	0.0211	TRUE	35	++++++++-++++++++-++++++?++++++-++++	65.9	99.8017	2.187e-08	0.0056354	-0.113636	0.0163511	3.66e-12	0.0265942	1.5e-05	657	FALSE	1
	cg18181229-chr1:164690836:SNP	cg18181229				Island	chr1	164545699	chr1:164690836:SNP	rs12098137	145137	-0.123226	0.0096081	1.18e-37	26741	C	T	0.283	0.0257	TRUE	34	+++++++++++++++++-+++++??++++++-+++-	66.5	98.4098	1.997e-08	0.0063118	-0.123583	0.0175112	1.7e-12	0.0286523	1.7e-05	657	FALSE	1
	cg18181229-chr1:164602338:SNP	cg18181229				Island	chr1	164545699	chr1:164602338:SNP	rs11585712	56639	-0.103849	0.0106283	1.5e-22	24375	A	G	0.2373	0.0202	TRUE	31	-+--+--?---+------?-+--??--------?+-	46	55.5561	0.003069	0.00303	-0.101369	0.015284	3.3e-11	0.0196822	1.32e-07	657	FALSE	1
	cg18181229-chr1:164698721:SNP	cg18181229				Island	chr1	164545699	chr1:164698721:SNP	rs1552558	153022	-0.0992995	0.0094903	1.27e-25	27735	A	G	0.2775	0.0246	TRUE	36	--+----------------------------+---+	60.3	88.1793	1.763e-06	0.0049928	-0.0954055	0.0159047	1.99e-09	0.0239099	3.28e-05	657	FALSE	1
	cg18181229-chr1:164692040:INDEL	cg18181229				Island	chr1	164545699	chr1:164692040:INDEL	chr1.164692040	146341	-0.123955	0.0109601	1.18e-29	23767	I	D	0.2311	0.0287	TRUE	31	+++++++?+?+++-+++++++++??++++++?+++-	56.3	68.6317	7.385e-05	0.0048818	-0.122117	0.017633	4.34e-12	0.0250738	7.67e-07	657	FALSE	1
	cg18181229-chr1:164693215:SNP	cg18181229				Island	chr1	164545699	chr1:164693215:SNP	rs1489329	147516	-0.121131	0.0095223	4.54e-37	24995	T	C	0.3274	0.0287	TRUE	33	-------?+?-------+------?------+----	68.3	100.977	4.495e-09	0.0065501	-0.11917	0.0178365	2.37e-11	0.0300481	5.55e-05	657	FALSE	1
	cg18181229-chr1:164689328:SNP	cg18181229				Island	chr1	164545699	chr1:164689328:SNP	rs2171691	143629	-0.0924056	0.008776	6.33e-26	27748	T	C	0.3732	0.0205	TRUE	36	-----------------++-----+------+----	63	94.5839	2.199e-07	0.0047805	-0.0912693	0.0151738	1.8e-09	0.0237164	9.77e-05	657	FALSE	1
	cg18181229-chr1:164578652:SNP	cg18181229				Island	chr1	164545699	chr1:164578652:SNP	rs2800788	32953	0.0837194	0.0085278	9.49e-23	27255	C	G	0.4883	0.0162	TRUE	35	+-++-++++++-+++++-++-+++?+++++++++++	53.1	72.4504	0.0001348	0.0029151	0.088974	0.0130914	1.07e-11	0.0181718	4.08e-06	657	FALSE	1
	cg18181229-chr1:164555286:SNP	cg18181229				Island	chr1	164545699	chr1:164555286:SNP	rs1780365	9587	-0.146856	0.0095493	2.28e-53	23662	A	G	0.3605	0.0321	TRUE	31	------?-----?-----------?------?-?+-	45.6	55.1032	0.003456	0.0024089	-0.142409	0.0137312	3.35e-25	0.0175399	5.63e-17	657	FALSE	1
	cg18181229-chr1:164581615:SNP	cg18181229				Island	chr1	164545699	chr1:164581615:SNP	rs1780355	35916	0.0828047	0.0086526	1.07e-21	26470	G	A	0.4887	0.0157	TRUE	34	-+--+--?---+-----+--+---?-----------	55.3	73.8958	5.752e-05	0.0031971	0.087874	0.0136395	1.18e-10	0.0193755	1.92e-05	657	FALSE	1
	cg14927745-chr2:241437336:SNP	cg14927745				Island	chr2	241562485	chr2:241437336:SNP	rs78557056	125149	-0.149312	0.0120216	2.03e-35	25984	G	A	0.1593	0.0162	TRUE	33	++++++++++++++++++++++++?+??++++++++	3.8	33.249	0.4062	0.0001891	-0.148329	0.012367	3.82e-33	0.0124908	6.21e-33	547	FALSE	1
	cg14927745-chr2:241533030:SNP	cg14927745				Island	chr2	241562485	chr2:241533030:SNP	rs3792273	29455	0.141677	0.0112594	2.62e-36	27141	C	T	0.1758	0.0141	TRUE	35	-+---------------------++-?--------+	65	97.0914	5.525e-08	0.008356	0.145823	0.0201225	4.27e-13	0.0321526	1.05e-05	547	FALSE	1
	cg14927745-chr2:241600587:SNP	cg14927745				Island	chr2	241562485	chr2:241600587:SNP	rs112706690	38102	-0.22357	0.0107386	2.89e-96	24727	A	G	0.221	0.0114	TRUE	31	-------?----------?-----?-??--------	16.8	36.048	0.2065	0.0007317	-0.223236	0.012132	1.3e-75	0.0129035	2.98e-67	547	FALSE	1
	cg14927745-chr2:241447326:SNP	cg14927745				Island	chr2	241562485	chr2:241447326:SNP	rs112741932	115159	-0.100113	0.013678	2.49e-13	26470	C	T	0.1174	0.0143	TRUE	34	++++-++-++-++-++++++++++++??++++-++-	0	31.4303	0.5453	0	-0.100113	0.013678	2.49e-13	0.013678	2.49e-13	547	FALSE	1
	cg14927745-chr2:241623458:SNP	cg14927745				Island	chr2	241562485	chr2:241623458:SNP	rs116186405	60973	0.357333	0.0222884	7.61e-58	23223	C	A	0.046	0.0079	TRUE	28	---?-??---------+-?--?--?-??--------	15.2	31.8395	0.2381	0.0025484	0.36082	0.0251019	7.51e-47	0.0262835	4.27e-42	547	FALSE	1
	cg14927745-chr2:241564980:SNP	cg14927745				Island	chr2	241562485	chr2:241564980:SNP	rs13019955	2495	0.477349	0.00918	0	25176	C	A	0.3109	0.0366	TRUE	32	-------?----------------?-??--------	44.5	55.8666	0.004014	0.0021979	0.478619	0.0130246	0.000000000000000000000000000000000000000000000000000000000000000000000000000000000000000000000000000000000000000000000000000000000000000000000000000000000000000000000000000000000000000000000000000000000000000000000000000000000000000000000000000000000000000000000000000000000000000000000000000000129	0.0165437	4.54e-183	547	FALSE	1
	cg14927745-chr2:241536692:SNP	cg14927745				Island	chr2	241562485	chr2:241536692:SNP	rs3792275	25793	0.142358	0.0112751	1.52e-36	27141	A	G	0.1753	0.0135	TRUE	35	+-+++++++++++++++++++++--+?++++++++-	65.3	97.923	4.162e-08	0.0084903	0.146648	0.0202333	4.23e-13	0.0324733	1.17e-05	547	FALSE	1
	cg14927745-chr2:241606231:SNP	cg14927745				Island	chr2	241562485	chr2:241606231:SNP	rs62187778	43746	-0.224133	0.0107226	5.06e-97	24745	T	C	0.2213	0.0122	TRUE	31	-------?----------?-----?-??--------	12.2	34.1598	0.2745	0.0005017	-0.224046	0.0117119	1.43e-81	0.0122095	2.89e-75	547	FALSE	1
	cg14927745-chr2:241525545:SNP	cg14927745				Island	chr2	241562485	chr2:241525545:SNP	rs72999961	36940	0.764143	0.0468574	8.68e-60	12220	T	C	0.0167	0.002	TRUE	13	?++??????????++??+?+??++?????+++?++?	0	8.28088	0.7628	0	0.764143	0.0468574	8.68e-60	0.0468574	8.68e-60	547	FALSE	1
	cg14927745-chr2:241555633:SNP	cg14927745				Island	chr2	241562485	chr2:241555633:SNP	rs76317996	6852	0.352142	0.021056	0	21246	G	C	0.0556	0.0145	TRUE	27	------????----------??-+?-??--------	76.9	112.369	1.038e-12	0.0405489	0.333138	0.0462323	5.77e-13	0.0910018	0.000109	547	FALSE	1
	cg14927745-chr2:241651875:SNP	cg14927745				Island	chr2	241562485	chr2:241651875:SNP	rs67845365	89390	0.256783	0.0105904	7.15e-130	22337	G	C	0.2635	0.0189	TRUE	31	------?---------------?-?-??------+-	30.7	43.3206	0.05489	0.0015604	0.257972	0.0131818	2.77e-85	0.0152927	2.83e-63	547	FALSE	1
	cg14927745-chr2:241587093:SNP	cg14927745				Island	chr2	241562485	chr2:241587093:SNP	rs4676400	24608	0.229067	0.0088397	0	24997	G	T	0.4782	0.0232	TRUE	33	-------?-?--------------?-----------	36.4	50.2954	0.02087	0.0014962	0.229786	0.0116292	6.65e-87	0.0138937	4.54e-61	547	FALSE	1
	cg14927745-chr2:241478118:SNP	cg14927745				Island	chr2	241562485	chr2:241478118:SNP	rs113293453	84367	-0.301714	0.0197167	7.37e-53	20994	A	G	0.0678	0.0155	TRUE	28	------??-?----------??--?-?---?---+-	8.8	29.6132	0.3318	0.0010739	-0.301075	0.0210778	2.75e-46	0.021625	3.06e-44	547	FALSE	1
	cg14927745-chr2:241625646:SNP	cg14927745				Island	chr2	241562485	chr2:241625646:SNP	rs78626718	63161	0.349857	0.0226093	5.2e-54	22716	A	G	0.0455	0.0074	TRUE	27	+++?+??+++++++++-+?++?+??+??++++++++	18.3	31.8051	0.1996	0.0031524	0.352854	0.0260871	1.1e-41	0.0276573	1.12e-36	547	FALSE	1
	cg14927745-chr2:241437715:SNP	cg14927745				Island	chr2	241562485	chr2:241437715:SNP	rs115910060	124770	-0.240224	0.0214331	3.72e-29	25960	T	G	0.0452	0.0071	TRUE	33	---+----+---------+-----?-??---+----	18.2	39.13	0.1802	0.0034258	-0.234409	0.0244786	1.01e-21	0.0262086	4.92e-20	547	FALSE	1
	cg14927745-chr2:241541811:SNP	cg14927745				Island	chr2	241562485	chr2:241541811:SNP	rs114966520	20674	0.299363	0.0181167	0	26268	T	C	0.0633	0.0097	TRUE	34	++++++?+-+++++++++++++++++?+++++++++	55.2	73.7188	6.064e-05	0.0140386	0.316382	0.0290219	1.13e-27	0.040471	1.39e-13	547	FALSE	1
	cg14927745-chr2:241569442:SNP	cg14927745				Island	chr2	241562485	chr2:241569442:SNP	rs35146537	6957	-0.32176	0.0380249	2.63e-17	21705	A	G	0.0181	0.0045	TRUE	26	----?--?+--?-+----?--?-??-??--?-----	0	21.657	0.6555	0	-0.32176	0.0380249	2.63e-17	0.0380249	2.63e-17	547	FALSE	1
	cg14927745-chr2:241644934:SNP	cg14927745				Island	chr2	241562485	chr2:241644934:SNP	rs1583259	82449	-0.147697	0.0091944	4.57e-58	25451	G	T	0.3649	0.0246	TRUE	32	++++++?+++++++++++?++++??+++++++++++	0	29.6908	0.5333	0	-0.147697	0.0091944	4.57e-58	0.0091944	4.57e-58	547	FALSE	1
	cg14927745-chr2:241446082:INDEL	cg14927745				Island	chr2	241562485	chr2:241446082:INDEL	chr2.241446082	116403	-0.105999	0.0147307	0	22544	D	I	0.119	0.0148	TRUE	29	---?+--?-?+--+----------?-??---?+--+	0	26.4784	0.5468	0	-0.105999	0.0147307	6.21e-13	0.0147307	6.21e-13	547	FALSE	1
	cg14927745-chr2:241620433:SNP	cg14927745				Island	chr2	241562485	chr2:241620433:SNP	rs370887151	57948	0.385737	0.035634	2.62e-27	14531	T	C	0.0275	0.0044	TRUE	17	?++???????++?++??+++??++?+???++??+++	34.4	24.3732	0.08166	0.0118252	0.397837	0.0476133	6.51e-17	0.0542823	1.19e-12	547	FALSE	1
	cg14927745-chr2:241539071:SNP	cg14927745				Island	chr2	241562485	chr2:241539071:SNP	rs73001880	23414	0.298097	0.0180798	4.49e-61	26276	C	T	0.0635	0.0096	TRUE	34	------?-------------------?---------	54.3	72.2622	9.339e-05	0.0134798	0.314868	0.0286684	4.61e-28	0.0395906	5.09e-14	547	FALSE	1
	cg14927745-chr2:241647980:SNP	cg14927745				Island	chr2	241562485	chr2:241647980:SNP	rs4407245	85495	-0.130535	0.0115059	7.85e-30	17792	G	A	0.3103	0.0388	TRUE	23	+++?-+??+?++++++++?+??+??+??++?++?++	0	21.5255	0.4885	0	-0.130535	0.0115059	7.85e-30	0.0115059	7.85e-30	547	FALSE	1
	cg14927745-chr2:241564098:SNP	cg14927745				Island	chr2	241562485	chr2:241564098:SNP	rs55970834	1613	0.2694	0.0160351	2.41e-63	25945	T	C	0.0804	0.0107	TRUE	33	++-+++++++++++++++++++++?+??++++++++	74.1	123.746	1.006e-12	0.0247109	0.264165	0.0333418	2.32e-15	0.0620088	1.4e-05	547	FALSE	1
	cg14927745-chr2:241592778:SNP	cg14927745				Island	chr2	241562485	chr2:241592778:SNP	rs6744241	30293	-0.187752	0.0119674	1.81e-55	25978	G	A	0.161	0.0147	TRUE	33	+++++++++++++++++++++-++?+??++++++++	15.6	37.9196	0.2174	0.0008868	-0.187982	0.013408	1.18e-44	0.0141812	5.19e-40	547	FALSE	1
	cg14927745-chr2:241569849:SNP	cg14927745				Island	chr2	241562485	chr2:241569849:SNP	rs12468377	7364	0.264705	0.0159278	5.08e-62	25972	T	C	0.0817	0.0104	TRUE	33	++-+++++++++++++++++-+++?+??++++++++	75.3	129.735	1.009e-13	0.0259731	0.262127	0.0338938	1.04e-14	0.064575	4.15e-05	547	FALSE	1
	cg14927745-chr2:241630513:SNP	cg14927745				Island	chr2	241562485	chr2:241630513:SNP	rs1968423	68028	-0.230221	0.0128641	1.26e-71	12032	A	G	0.4463	0.0221	TRUE	17	?--??-????--?--?--?-???-?-???--??---	42.8	27.9825	0.03177	0.0021542	-0.224877	0.0179607	5.76e-36	0.0224981	1.41e-24	547	FALSE	1
	cg14927745-chr2:241562542:SNP	cg14927745				Island	chr2	241562485	chr2:241562542:SNP	rs11887524	57	0.71871	0.0139951	0	7812	C	A	0.4257	0.0327	TRUE	14	?--?-??---?-???--????????-??-??-??--	73.4	48.9522	4.505e-06	0.0078259	0.70657	0.02882	9.82e-133	0.0526992	2.38e-42	547	FALSE	1
	cg14927745-chr2:241601102:SNP	cg14927745				Island	chr2	241562485	chr2:241601102:SNP	rs79319858	38617	0.353049	0.0205471	3.59e-66	25952	C	A	0.0481	0.0079	TRUE	33	-----------+----+-------?-??--------	30	45.7212	0.05499	0.0060858	0.358082	0.0260047	3.87e-43	0.0293574	2.6e-33	547	FALSE	1
	cg14927745-chr2:241614719:SNP	cg14927745				Island	chr2	241562485	chr2:241614719:SNP	rs369482528	52234	-0.228831	0.0170412	4.14e-41	13040	A	G	0.1626	0.0219	TRUE	16	?--??-????--?-??--?-??-??-???--??---	53.7	32.3982	0.00568	0.0056094	-0.229465	0.0271097	2.58e-17	0.036807	5.07e-10	547	FALSE	1
	cg14927745-chr2:241566871:SNP	cg14927745				Island	chr2	241562485	chr2:241566871:SNP	rs12477906	4386	0.453529	0.0098094	0	26214	G	A	0.2424	0.0379	TRUE	33	------------------?-----?-?---------	66.6	95.9177	2.665e-08	0.0064431	0.453824	0.0179427	3.82e-141	0.029403	1.12e-53	547	FALSE	1
	cg14927745-chr2:241417278:INDEL	cg14927745				Island	chr2	241562485	chr2:241417278:INDEL	chr2.241417278	145207	0.080981	0.0101547	1.53e-15	23001	D	I	0.3009	0.0246	TRUE	30	+++-+++?-?+++++-++-+++++?+??+-+?++++	32.4	42.902	0.04649	0.0015073	0.0770935	0.0129485	2.62e-09	0.0150226	7.02e-08	547	FALSE	1
	cg14927745-chr2:241543594:SNP	cg14927745				Island	chr2	241562485	chr2:241543594:SNP	rs73003723	18891	0.299452	0.0181026	1.83e-61	26265	A	G	0.0629	0.0093	TRUE	34	++++++?+-+++++++++++++++++?+++++++++	55	73.2954	6.879e-05	0.0138677	0.315523	0.0289056	9.7e-28	0.0402072	9.5e-14	547	FALSE	1
	cg14927745-chr2:241652395:SNP	cg14927745				Island	chr2	241562485	chr2:241652395:SNP	rs755302	89910	0.256892	0.0105826	3.61e-130	22364	A	G	0.2637	0.0184	TRUE	31	++++++?+++++++++++++++?+?+??++++++-+	28.1	41.7295	0.07548	0.001372	0.257739	0.0129048	9.6e-89	0.0147202	3.35e-68	547	FALSE	1
	cg14927745-chr2:241629397:SNP	cg14927745				Island	chr2	241562485	chr2:241629397:SNP	rs1968426	66912	-0.231593	0.0102977	5.23e-112	18567	C	T	0.4775	0.0264	TRUE	26	++++++??+?+++++-++?++??+?+??+++?++++	53.9	54.184	0.0006289	0.0032646	-0.224768	0.0159454	4.02e-45	0.0223189	3.17e-25	547	FALSE	1
	cg14927745-chr2:241462551:SNP	cg14927745				Island	chr2	241562485	chr2:241462551:SNP	rs35244371	99934	0.181747	0.0124208	1.74e-48	24557	A	G	0.1592	0.0165	TRUE	32	++++++++++++++++++?+++++++??++?+++++	29.2	43.8063	0.06341	0.0020701	0.175435	0.0154481	6.89e-30	0.0175519	3.98e-25	547	FALSE	1
	cg14927745-chr2:241432193:SNP	cg14927745				Island	chr2	241562485	chr2:241432193:SNP	rs140490788	130292	-0.0968266	0.0139214	3.52e-12	25984	T	C	0.115	0.0149	TRUE	33	----+--+-----+----------?-??----+--+	0	27.5006	0.6938	0	-0.0968266	0.0139214	3.52e-12	0.0139214	3.52e-12	547	FALSE	1
	cg14927745-chr2:241608723:SNP	cg14927745				Island	chr2	241562485	chr2:241608723:SNP	rs148249055	46238	0.357974	0.0207596	1.25e-66	25957	T	C	0.0475	0.0084	TRUE	33	++++++++++++++++-+++++++?+??++++++++	27.8	44.2911	0.07274	0.0055683	0.364409	0.0258316	3.43e-45	0.0287334	1.26e-35	547	FALSE	1
	cg14927745-chr2:241563652:SNP	cg14927745				Island	chr2	241562485	chr2:241563652:SNP	rs2975780	1167	0.273443	0.0108484	3.46e-140	16768	T	A	0.4077	0.0262	TRUE	21	?--??--???--?--?----??--?-?-?--??---	48.7	38.9635	0.006737	0.0024114	0.267724	0.0161972	2.27e-61	0.0211346	2.74e-38	547	FALSE	1
	cg14927745-chr2:241528968:SNP	cg14927745				Island	chr2	241562485	chr2:241528968:SNP	rs55976923	33517	0.140962	0.0114601	9.04e-35	26271	C	G	0.1748	0.0134	TRUE	34	+-++++?++++++++++++++++--+?++++++++-	65.8	96.4107	3.983e-08	0.0087173	0.145294	0.0207445	2.49e-12	0.0334812	2.55e-05	547	FALSE	1
	cg14927745-chr2:241581451:SNP	cg14927745				Island	chr2	241562485	chr2:241581451:SNP	rs1864879	18966	0.387737	0.0099689	0	24998	C	G	0.2558	0.0378	TRUE	33	+++++++?+?++++++++++++++?+++++++++++	56.9	74.258	3.292e-05	0.0044022	0.388708	0.0160637	2.34e-129	0.0231335	4.72e-63	547	FALSE	1
	cg14927745-chr2:241461372:SNP	cg14927745				Island	chr2	241562485	chr2:241461372:SNP	rs13394744	101113	-0.189337	0.0114999	6.63e-61	26579	A	T	0.1757	0.038	TRUE	34	----------------+-------?--?--------	8.9	36.2366	0.32	0.0004472	-0.18888	0.0122741	1.96e-53	0.0126278	8.07e-51	547	FALSE	1
	cg14927745-chr2:241565156:SNP	cg14927745				Island	chr2	241562485	chr2:241565156:SNP	rs67950490	2671	0.473425	0.013164	0.00000000000000000000000000000000000000000000000000000000000000000000000000000000000000000000000000000000000000000000000000000000000000000000000000000000000000000000000000000000000000000000000000000000000000000000000000000000000000000000000000000000000000000000000000000000000000000031	15667	A	G	0.2141	0.0284	TRUE	19	?++??++???++?++?++?+??++?+???++??+++	77	78.105	1.835e-09	0.0114054	0.473116	0.0295466	1.05e-57	0.0571208	1.15e-16	547	FALSE	1
	cg14927745-chr2:241600184:SNP	cg14927745				Island	chr2	241562485	chr2:241600184:SNP	rs62187775	37699	-0.225626	0.0105653	3.47e-101	25484	A	G	0.2223	0.0116	TRUE	32	------------------?-----?-??--------	8.3	33.7897	0.3342	0.0003261	-0.2255	0.0112137	6.11e-90	0.011516	1.8e-85	547	FALSE	1
	cg14927745-chr2:241539003:SNP	cg14927745				Island	chr2	241562485	chr2:241539003:SNP	rs2953168	23482	0.141387	0.0112848	5.18e-36	27121	G	A	0.175	0.0136	TRUE	35	-+---------------------++-?--------+	65.6	98.713	3.177e-08	0.00861	0.146272	0.0203283	6.23e-13	0.0327634	1.59e-05	547	FALSE	1
	cg14927745-chr2:241584754:SNP	cg14927745				Island	chr2	241562485	chr2:241584754:SNP	rs10933625	22269	0.390626	0.0094582	0	27737	G	C	0.2547	0.0362	TRUE	36	------------------------------------	57.4	82.1499	1.163e-05	0.004399	0.39291	0.0152786	7.68e-146	0.0221998	2.65e-69	547	FALSE	1
	cg14927745-chr2:241541536:SNP	cg14927745				Island	chr2	241562485	chr2:241541536:SNP	rs2953163	20949	-0.384766	0.0172184	1.31e-110	25854	T	C	0.0721	0.0138	TRUE	33	-------?----------------?-?---------	0	21.3699	0.9232	0	-0.384766	0.0172184	1.31e-110	0.0172184	1.31e-110	547	FALSE	1
	cg14927745-chr2:241415950:SNP	cg14927745				Island	chr2	241562485	chr2:241415950:SNP	rs190327826	146535	-0.0938062	0.0146046	1.34e-10	24481	A	G	0.1108	0.0137	TRUE	31	----+--?+-+-------------?-??---?+--+	0	27.9424	0.5735	0	-0.0938062	0.0146046	1.34e-10	0.0146046	1.34e-10	547	FALSE	1
	cg14927745-chr2:241623493:SNP	cg14927745				Island	chr2	241562485	chr2:241623493:SNP	rs116592275	61008	0.352018	0.0222392	1.97e-56	23224	A	C	0.0461	0.0078	TRUE	28	+++?+??++++-++++-+?++?++?+??++++++++	21.5	34.3791	0.1553	0.0038679	0.355129	0.0262974	1.47e-41	0.0283172	1.77e-35	547	FALSE	1
	cg14927745-chr2:241528221:SNP	cg14927745				Island	chr2	241562485	chr2:241528221:SNP	rs77622920	34264	-0.381009	0.0173359	4.67e-107	25859	T	G	0.0715	0.0145	TRUE	33	-------?----------------?-?---------	0	22.3904	0.8966	0	-0.381009	0.0173359	4.67e-107	0.0173359	4.67e-107	547	FALSE	1
	cg14927745-chr2:241571466:INDEL	cg14927745				Island	chr2	241562485	chr2:241571466:INDEL	chr2.241571466	8981	0.23486	0.0107916	5.19e-105	16769	D	I	0.4473	0.0204	TRUE	21	?++??++???++?++?++++??++?+?+?++??+++	54.1	43.598	0.001703	0.0029682	0.229922	0.0170657	2.26e-41	0.0235247	1.8e-23	547	FALSE	1
	cg14927745-chr2:241575361:SNP	cg14927745				Island	chr2	241562485	chr2:241575361:SNP	rs12474275	12876	0.250818	0.0160989	9.99e-55	25941	T	C	0.08	0.0109	TRUE	33	++-++++++++++-++++++-+++?+??++++++++	75.3	129.408	1.145e-13	0.0264545	0.242822	0.0342587	1.36e-12	0.0651044	0.0001169	547	FALSE	1
	cg14927745-chr2:241562831:SNP	cg14927745				Island	chr2	241562485	chr2:241562831:SNP	rs62187257	346	0.603895	0.0185016	1.11e-233	10445	A	G	0.1525	0.0287	TRUE	14	?++??+????++?+??++?+??+??+???+????++	54.2	28.3747	0.008021	0.0061728	0.621794	0.0308006	1.26e-90	0.0403829	1.46e-50	547	FALSE	1
	cg14927745-chr2:241621416:SNP	cg14927745				Island	chr2	241562485	chr2:241621416:SNP	rs73117921	58931	0.220276	0.0178133	4e-35	6261	A	G	0.4699	0.0204	TRUE	11	+??????????+?+?+++???????+??+???+?-+	62.3	26.5056	0.003117	0.0062064	0.212947	0.0322567	4.07e-11	0.0472152	3.08e-06	547	FALSE	1
	cg14927745-chr2:241558134:SNP	cg14927745				Island	chr2	241562485	chr2:241558134:SNP	rs73005895	4351	0.295116	0.0192222	0	22973	G	A	0.0637	0.0093	TRUE	30	------????--------------?-?---------	47.9	55.6343	0.002088	0.0104154	0.31053	0.0286269	2.05e-27	0.0368763	1.22e-15	547	FALSE	1
	cg14927745-chr2:241431311:SNP	cg14927745				Island	chr2	241562485	chr2:241431311:SNP	rs78205760	131174	-0.241389	0.0215529	4.09e-29	25984	G	A	0.0447	0.007	TRUE	33	+++-++++-+++++++++-+++++?+??+++-++++	19.7	39.8266	0.161	0.0038038	-0.235264	0.024892	3.34e-21	0.0268243	2.28e-19	547	FALSE	1
	cg14927745-chr2:241608862:SNP	cg14927745				Island	chr2	241562485	chr2:241608862:SNP	rs192071402	46377	-0.35638	0.0217974	4.37e-60	14398	T	C	0.0838	0.0236	TRUE	17	---?--????-??-??--????-??-??---?-?--	6.3	17.0812	0.3804	0.0005644	-0.354519	0.0229025	4.77e-54	0.0232703	6.09e-53	547	FALSE	1
	cg14927745-chr2:241582981:INDEL	cg14927745				Island	chr2	241562485	chr2:241582981:INDEL	chr2.241582981	20496	-0.255901	0.0146979	6.84e-68	13256	I	D	0.2208	0.0134	TRUE	19	?++??++???++?++?++?+?+?+?+???++??+++	0	17.1756	0.5111	0	-0.255901	0.0146979	6.84e-68	0.0146979	6.84e-68	547	FALSE	1
	cg14927745-chr2:241570736:SNP	cg14927745				Island	chr2	241562485	chr2:241570736:SNP	rs2953156	8251	0.457368	0.0099549	0	25431	A	G	0.2431	0.0388	TRUE	32	+++++++?++++++++++?+++++?+?+++++++++	67.9	96.6772	1.133e-08	0.006834	0.457543	0.0186089	1.73e-133	0.0310455	4.01e-49	547	FALSE	1
	cg14927745-chr2:241500674:SNP	cg14927745				Island	chr2	241562485	chr2:241500674:SNP	rs4676426	61811	0.16502	0.0097477	2.74e-64	20946	C	G	0.4535	0.0164	TRUE	28	++++++??+?+-++++++?++-++?+??++?+++++	47	50.9669	0.003512	0.0024075	0.160052	0.0141892	1.65e-29	0.0184003	3.01e-19	547	FALSE	1
	cg14927745-chr2:241449998:SNP	cg14927745				Island	chr2	241562485	chr2:241449998:SNP	rs113831695	112487	-0.242567	0.0217486	0	25473	T	C	0.0451	0.0071	TRUE	32	---+--------------+----??-??---+----	23	40.2756	0.1229	0.0045961	-0.23588	0.0257622	5.38e-20	0.028256	9.12e-18	547	FALSE	1
	cg14927745-chr2:241553449:SNP	cg14927745				Island	chr2	241562485	chr2:241553449:SNP	rs56026499	9036	0.385116	0.0204825	7.25e-79	25762	G	A	0.0475	0.0084	TRUE	33	------?---------+-------?-?---------	50.3	64.4082	0.0005892	0.0142681	0.398201	0.0310191	1.01e-37	0.0412263	9.5e-21	547	FALSE	1
	cg14927745-chr2:241610062:SNP	cg14927745				Island	chr2	241562485	chr2:241610062:SNP	rs77294644	47577	-0.223973	0.0107516	2.24e-96	24725	T	C	0.2206	0.0125	TRUE	31	-------?----------?-----?-??--------	15.6	35.5482	0.2232	0.0006728	-0.22381	0.0120393	3.87e-77	0.01274	3.49e-69	547	FALSE	1
	cg14927745-chr2:241534188:SNP	cg14927745				Island	chr2	241562485	chr2:241534188:SNP	rs70961719	28297	-0.382789	0.0172277	2.23e-109	25860	T	A	0.0722	0.0141	TRUE	33	+++++++?++++++++++++++++?+?+++++++++	0	22.4155	0.8959	0	-0.382789	0.0172277	2.23e-109	0.0172277	2.23e-109	547	FALSE	1
	cg14927745-chr2:241622034:SNP	cg14927745				Island	chr2	241562485	chr2:241622034:SNP	rs184125501	59549	-0.350604	0.0206039	6.21e-65	15876	C	G	0.0872	0.027	TRUE	19	---?--????--?--?--????-??-??---?-?--	0	14.8335	0.6734	0	-0.350604	0.0206039	6.21e-65	0.0206039	6.21e-65	547	FALSE	1
	cg14927745-chr2:241581315:INDEL	cg14927745				Island	chr2	241562485	chr2:241581315:INDEL	chr2.241581315	18830	0.313975	0.0125251	1.12e-138	14010	I	D	0.3266	0.0284	TRUE	20	?--??--???--?--?----???-?-?-?--??---	18.7	23.3801	0.221	0.0007353	0.313662	0.014259	3.05e-107	0.0154125	3e-92	547	FALSE	1
	cg14927745-chr2:241576399:SNP	cg14927745				Island	chr2	241562485	chr2:241576399:SNP	rs1368222	13914	-0.170529	0.01021	1.26e-62	22073	C	T	0.3052	0.0168	TRUE	28	++++++??+?+-++++++?++?++?-??++++++-+	66.6	80.8808	2.775e-07	0.0059371	-0.163929	0.0187499	2.27e-18	0.030585	2.47e-08	547	FALSE	1
	cg14927745-chr2:241597150:SNP	cg14927745				Island	chr2	241562485	chr2:241597150:SNP	rs6437358	34665	0.336038	0.0094956	0.000000000000000000000000000000000000000000000000000000000000000000000000000000000000000000000000000000000000000000000000000000000000000000000000000000000000000000000000000000000000000000000000000000000000000000000000000000000000000000000000000000000000000000000000000000000255	24716	C	G	0.3128	0.0363	TRUE	31	+++++++?++++++++++?+++++?+??++++++++	39.8	49.8418	0.01288	0.0018803	0.335939	0.0129231	5.6e-149	0.015776	1.12e-100	547	FALSE	1
	cg14927745-chr2:241595909:SNP	cg14927745				Island	chr2	241562485	chr2:241595909:SNP	rs4676396	33424	-0.20477	0.0110177	4.21e-77	26604	T	C	0.1931	0.0205	TRUE	34	------------------------?-?---------	26.9	45.1398	0.07745	0.0015377	-0.205659	0.0134043	3.96e-53	0.0150709	4.77e-42	547	FALSE	1
	cg14927745-chr2:241542133:SNP	cg14927745				Island	chr2	241562485	chr2:241542133:SNP	rs144050925	20352	0.300136	0.0185051	3.7e-59	25543	A	G	0.0624	0.0098	TRUE	33	++++++?+-+++++++++++++++++?++++?++++	56.5	73.5299	4.111e-05	0.0149666	0.313906	0.030111	1.91e-25	0.0425213	1.68e-12	547	FALSE	1
	cg14927745-chr2:241593314:SNP	cg14927745				Island	chr2	241562485	chr2:241593314:SNP	rs58713933	30829	0.173439	0.0088288	6.42e-86	25484	T	C	0.45	0.0256	TRUE	34	+++++++?+?+++++++++++++++-++++++++-+	55	73.297	6.876e-05	0.0032853	0.174355	0.013891	3.89e-36	0.0196098	9.19e-19	547	FALSE	1
	cg14927745-chr2:241626057:SNP	cg14927745				Island	chr2	241562485	chr2:241626057:SNP	rs10804412	63572	-0.191435	0.0089003	1.28e-102	25179	A	G	0.4477	0.0244	TRUE	32	------?--------+--?-------??--------	23.7	40.6416	0.1152	0.0008011	-0.189315	0.0106175	4.1e-71	0.0116684	1.73e-60	547	FALSE	1
	cg14927745-chr2:241609901:SNP	cg14927745				Island	chr2	241562485	chr2:241609901:SNP	rs117072509	47416	0.341301	0.0224946	5.37e-52	21998	G	T	0.0473	0.0072	TRUE	28	--?---?-------?-+------??-??-?------	19.3	33.478	0.1818	0.0034866	0.347926	0.0263318	7.37e-40	0.0278916	1.98e-34	547	FALSE	1
	cg14927745-chr2:241531954:SNP	cg14927745				Island	chr2	241562485	chr2:241531954:SNP	rs56027088	30531	0.29796	0.0180827	5.31e-61	26278	A	G	0.0635	0.0096	TRUE	34	++++++?+++++++++++++++++++?+++++++++	54.3	72.2433	9.391e-05	0.0134767	0.314771	0.0286664	4.74e-28	0.0395864	5.2e-14	547	FALSE	1
	cg14927745-chr2:241574896:SNP	cg14927745				Island	chr2	241562485	chr2:241574896:SNP	rs12470991	12411	0.29171	0.019917	1.42e-48	16103	A	G	0.0829	0.0106	TRUE	20	?+-??++???++?-+?++++??++?+???++??+++	81.6	103.236	1.384e-13	0.0362467	0.290303	0.0495965	4.82e-09	0.108219	0.007027	547	FALSE	1
	cg14927745-chr2:241580450:SNP	cg14927745				Island	chr2	241562485	chr2:241580450:SNP	rs62186548	17965	0.36895	0.0133889	3.71e-167	13550	C	T	0.2689	0.0217	TRUE	19	?--??--???--?--?--?-???-?-?-?--??---	73.1	66.801	1.559e-07	0.0094011	0.370348	0.0271829	2.87e-42	0.0496885	1.13e-13	547	FALSE	1
	cg14927745-chr2:241588848:SNP	cg14927745				Island	chr2	241562485	chr2:241588848:SNP	rs6753218	26363	-0.185704	0.0119825	3.58e-54	25977	C	T	0.1611	0.0148	TRUE	33	+++++++++++++++++++++-++?+??++++++++	13	36.7945	0.2565	0.0007201	-0.185869	0.0131762	3.47e-45	0.0137778	2.09e-41	547	FALSE	1
	cg14927745-chr2:241427224:SNP	cg14927745				Island	chr2	241562485	chr2:241427224:SNP	rs113533936	135261	-0.244524	0.0217243	2.17e-29	25475	C	T	0.0448	0.0069	TRUE	32	+++-++++-+++++++++-++++??+??+++-++++	20.8	39.1247	0.15	0.0040164	-0.238222	0.0252883	4.5e-21	0.0274179	4.73e-19	547	FALSE	1
	cg14927745-chr2:241446782:SNP	cg14927745				Island	chr2	241562485	chr2:241446782:SNP	rs114552329	115703	-0.102093	0.0138721	1.84e-13	25239	A	G	0.1203	0.016	TRUE	32	----+--+-----+----------?-??---?---+	0	28.6897	0.5854	0	-0.102093	0.0138721	1.84e-13	0.0138721	1.84e-13	547	FALSE	1
	cg14927745-chr2:241528927:SNP	cg14927745				Island	chr2	241562485	chr2:241528927:SNP	rs55893551	33558	0.141062	0.0114599	0	26271	A	G	0.1749	0.0134	TRUE	34	+-++++?++++++++++++++++--+?++++++++-	65.8	96.575	3.764e-08	0.0087394	0.145484	0.0207608	2.42e-12	0.0335375	2.6e-05	547	FALSE	1
	cg14927745-chr2:241573742:SNP	cg14927745				Island	chr2	241562485	chr2:241573742:SNP	rs2975792	11257	0.712547	0.0557464	2.07e-37	5143	A	C	0.0344	0.0077	TRUE	9	?++????????+?????+???????+??+??+??-+	45.2	14.5861	0.06771	0.0243273	0.691161	0.0810842	1.54e-17	0.10164	2.38e-12	547	FALSE	1
	cg14927745-chr2:241481778:SNP	cg14927745				Island	chr2	241562485	chr2:241481778:SNP	rs13423333	80707	-0.168172	0.0115858	9.69e-48	27243	T	C	0.1645	0.0228	TRUE	35	-----------+----+-------?-----------	8.8	37.2948	0.32	0.0004614	-0.167606	0.0123527	6.17e-42	0.0127085	5.66e-40	547	FALSE	1
	cg14927745-chr2:241539264:SNP	cg14927745				Island	chr2	241562485	chr2:241539264:SNP	rs113940744	23221	-0.38352	0.0172051	4.51e-110	25855	T	C	0.0723	0.0138	TRUE	33	-------?----------------?-?---------	0	20.9742	0.9322	0	-0.38352	0.0172051	4.51e-110	0.0172051	4.51e-110	547	FALSE	1
	cg14927745-chr2:241608780:SNP	cg14927745				Island	chr2	241562485	chr2:241608780:SNP	rs185043116	46295	0.35953	0.0208907	2.23e-66	25097	C	T	0.0481	0.0076	TRUE	32	------?---------+-------?-??--------	28.7	43.4981	0.06738	0.0057412	0.366966	0.0261955	1.38e-44	0.029313	1.39e-34	547	FALSE	1
	cg14927745-chr2:241600363:SNP	cg14927745				Island	chr2	241562485	chr2:241600363:SNP	rs35777810	37878	0.380226	0.009933	0.0000000000000000000000000000000000000000000000000000000000000000000000000000000000000000000000000000000000000000000000000000000000000000000000000000000000000000000000000000000000000000000000000000000000000000000000000000000000000000000000000000000000000000000000000000000000000000000000000000000000000000000000000000000137004403591778	25405	A	G	0.2524	0.0349	TRUE	32	+++++++?++++++++++?+++++?+?+++++++++	56.5	71.2003	5.312e-05	0.0041616	0.382112	0.0159447	6.47e-127	0.022814	2.3e-62	547	FALSE	1
	cg14927745-chr2:241541892:SNP	cg14927745				Island	chr2	241562485	chr2:241541892:SNP	rs10933619	20593	0.119218	0.0100046	9.72e-33	22378	G	C	0.3322	0.0215	TRUE	30	------+?+?--?--++----+--?-?------?--	66.2	85.8384	1.569e-07	0.0059923	0.107793	0.0182175	3.28e-09	0.029613	5.68e-05	547	FALSE	1
	cg14927745-chr2:241554343:INDEL	cg14927745				Island	chr2	241562485	chr2:241554343:INDEL	chr2.241554343	8142	0.609595	0.0564279	3.33e-27	8327	D	I	0.0223	0.0099	TRUE	11	?????+????++?-??+?+???+??+????+???++	43	17.5417	0.0632	0.029109	0.600261	0.0855732	2.31e-12	0.0989842	7.34e-10	547	FALSE	1
	cg14927745-chr2:241501725:SNP	cg14927745				Island	chr2	241562485	chr2:241501725:SNP	rs4676425	60760	0.148126	0.013667	2.27e-27	17770	A	G	0.1837	0.0376	TRUE	24	+++++?+?+?++++?-++?+??++?+??++?++?++	31.4	33.5273	0.07231	0.0021169	0.147711	0.017587	4.51e-17	0.0199226	1.05e-13	547	FALSE	1
	cg14927745-chr2:241543986:SNP	cg14927745				Island	chr2	241562485	chr2:241543986:SNP	rs138308709	18499	0.891779	0.0606621	6.38e-49	9186	T	C	0.0173	0.0086	TRUE	13	+??+++?????????+?++????+?+????++??++	35.4	18.5629	0.09964	0.0266228	0.893478	0.0776357	1.19e-30	0.0938387	2.03e-21	547	FALSE	1
	cg14927745-chr2:241609579:SNP	cg14927745				Island	chr2	241562485	chr2:241609579:SNP	rs7587179	47094	-0.198242	0.0128545	1.17e-53	24777	C	T	0.1438	0.0149	TRUE	31	++++++?+++-++++++++++?++?+??++++++++	29.4	42.4785	0.06509	0.0021667	-0.197299	0.0160452	9.47e-35	0.0182014	1.26e-27	547	FALSE	1
	cg14927745-chr2:241535036:SNP	cg14927745				Island	chr2	241562485	chr2:241535036:SNP	rs73001804	27449	0.297666	0.0180809	6.77e-61	26278	T	C	0.0636	0.0096	TRUE	34	++++++?+++++++++++++++++++?+++++++++	54.8	73.0277	7.448e-05	0.0137436	0.314705	0.0288249	9.48e-28	0.0400124	1.01e-13	547	FALSE	1
	cg14927745-chr2:241643701:SNP	cg14927745				Island	chr2	241562485	chr2:241643701:SNP	rs11682064	81216	-0.135403	0.0101188	7.77e-41	21908	C	G	0.3384	0.0215	TRUE	28	------??-?--------?----??-??------+-	59.3	66.3812	3.625e-05	0.0042588	-0.138395	0.0168303	1.99e-16	0.0248777	5.25e-08	547	FALSE	1
	cg14927745-chr2:241558936:SNP	cg14927745				Island	chr2	241562485	chr2:241558936:SNP	rs10933621	3549	-0.22386	0.0101157	1.62e-108	23108	T	C	0.3027	0.0229	TRUE	30	------?-----?-----------?-??-----?--	10.2	32.2832	0.3076	0.0003537	-0.224598	0.0109154	4.48e-94	0.0112609	6.14e-88	547	FALSE	1
	cg14927745-chr2:241605038:SNP	cg14927745				Island	chr2	241562485	chr2:241605038:SNP	rs62187777	42553	-0.224213	0.0107217	4.17e-97	24748	G	A	0.2217	0.0118	TRUE	31	+++++++?++++++++++?+++++?+??++++++++	11.5	33.9027	0.2847	0.0004707	-0.224109	0.0116555	2.17e-82	0.0121165	1.89e-76	547	FALSE	1
	cg14927745-chr2:241544290:SNP	cg14927745				Island	chr2	241562485	chr2:241544290:SNP	rs114494848	18195	0.52714	0.0425792	3.35e-35	12458	G	C	0.0225	0.0053	TRUE	18	------?????-?-?+--???--??????-?--?--	46.9	32.0225	0.01495	0.030675	0.545111	0.0643297	2.38e-17	0.0802056	4.95e-11	547	FALSE	1
	cg14927745-chr2:241565066:INDEL	cg14927745				Island	chr2	241562485	chr2:241565066:INDEL	chr2.241565066	2581	0.357995	0.0152288	0	8893	D	I	0.3575	0.0336	TRUE	14	?++??+????++?++?++?+?????+???+????++	72.4	47.0235	9.574e-06	0.0087273	0.364665	0.0308208	2.67e-32	0.0550854	8.09e-11	547	FALSE	1
	cg14927745-chr2:241589981:SNP	cg14927745				Island	chr2	241562485	chr2:241589981:SNP	rs62187761	27496	-0.25018	0.0111122	3.02e-112	23290	T	C	0.2176	0.0123	TRUE	30	-------?-?--------?-----?-??--------	21.8	37.0768	0.1443	0.0010485	-0.248618	0.0130328	3.97e-81	0.014207	2.08e-69	547	FALSE	1
	cg14927745-chr2:241647809:INDEL	cg14927745				Island	chr2	241562485	chr2:241647809:INDEL	chr2.241647809	85324	-0.159956	0.0223626	8.5e-13	5356	D	I	0.2572	0.0159	TRUE	7	-???-???-???-??-????????????-???-???	23.3	7.82065	0.2515	0.0011325	-0.153667	0.0265334	6.98e-09	0.0291483	4.07e-08	547	FALSE	1
	cg14927745-chr2:241572695:SNP	cg14927745				Island	chr2	241562485	chr2:241572695:SNP	rs2975790	10210	0.455267	0.0098232	0	26172	C	T	0.2416	0.0382	TRUE	33	------------------?-----?-?---------	66.7	96.1796	2.433e-08	0.0064905	0.45538	0.0180032	3.68e-141	0.0295247	1.2e-53	547	FALSE	1
	cg14927745-chr2:241531117:SNP	cg14927745				Island	chr2	241562485	chr2:241531117:SNP	rs41266971	31368	-0.382922	0.0172361	2.39e-109	25860	C	A	0.0723	0.0144	TRUE	33	+++++++?++++++++++++++++?+?+++++++++	0	21.5459	0.919	0	-0.382922	0.0172361	2.39e-109	0.0172361	2.39e-109	547	FALSE	1
	cg14927745-chr2:241461061:SNP	cg14927745				Island	chr2	241562485	chr2:241461061:SNP	rs112154518	101424	-0.164563	0.0137032	3.19e-33	24386	G	A	0.1301	0.0261	TRUE	32	+++++++?+?+++++--++++-++?+?+++++++++	27.8	42.9469	0.07502	0.0023487	-0.16218	0.0167995	4.73e-22	0.0189842	4.38e-18	547	FALSE	1
	cg14927745-chr2:241632186:SNP	cg14927745				Island	chr2	241562485	chr2:241632186:SNP	rs140071095	69701	0.341825	0.024157	1.86e-45	21230	T	C	0.0423	0.0073	TRUE	25	+++?+???++++++++-+?++?+??+??+++?++++	26.6	32.7004	0.1106	0.0054385	0.346739	0.0299941	6.55e-31	0.0329143	2.89e-25	547	FALSE	1
	cg14927745-chr2:241572153:SNP	cg14927745				Island	chr2	241562485	chr2:241572153:SNP	rs2975789	9668	-0.33331	0.0105437	2.5e-219	23923	A	T	0.2385	0.0123	TRUE	29	------------------?-??-??-??--------	20.1	35.0346	0.1689	0.0008227	-0.332337	0.0121968	1.76e-163	0.0131926	7.77e-141	547	FALSE	1
	cg14927745-chr2:241453632:SNP	cg14927745				Island	chr2	241562485	chr2:241453632:SNP	rs57404878	108853	-0.10664	0.0144557	1.62e-13	23725	G	A	0.1174	0.0152	TRUE	31	++++-++?+?-++-++++++++++?+??++++-++-	3.4	31.0528	0.4128	0.0002314	-0.105812	0.0148369	9.92e-13	0.014963	1.03e-12	547	FALSE	1
	cg14927745-chr2:241547312:SNP	cg14927745				Island	chr2	241562485	chr2:241547312:SNP	rs2975770	15173	-0.358345	0.0147905	1.13e-129	24114	C	T	0.1087	0.0233	TRUE	30	+++++++?++++++++++++??++?+??++++++++	0	25.027	0.6768	0	-0.358345	0.0147905	1.13e-129	0.0147905	1.13e-129	547	FALSE	1
	cg14927745-chr2:241468875:SNP	cg14927745				Island	chr2	241562485	chr2:241468875:SNP	rs35278753	93610	-0.298588	0.0311421	8.99e-22	18232	T	C	0.0299	0.0061	TRUE	23	----+?-?------?---?-??-??-???-?--?-+	41.8	37.8221	0.01918	0.0164216	-0.282291	0.0434184	7.94e-11	0.0535391	2.45e-08	547	FALSE	1
	cg14927745-chr2:241427104:SNP	cg14927745				Island	chr2	241562485	chr2:241427104:SNP	rs79968777	135381	-0.13157	0.0092342	4.6e-46	26646	T	G	0.3225	0.0182	TRUE	34	------------------------?-?---------	2	33.6821	0.4343	6.08e-05	-0.131315	0.0093727	1.35e-44	0.009425	2.75e-44	547	FALSE	1
	cg14927745-chr2:241543110:SNP	cg14927745				Island	chr2	241562485	chr2:241543110:SNP	rs75825616	19375	-0.382755	0.0171816	6.17e-110	25847	T	C	0.0724	0.0136	TRUE	33	-------?----------------?-?---------	0	21.1183	0.929	0	-0.382755	0.0171816	6.17e-110	0.0171816	6.17e-110	547	FALSE	1
	cg14927745-chr2:241526053:SNP	cg14927745				Island	chr2	241562485	chr2:241526053:SNP	rs56352308	36432	0.140337	0.0114543	1.64e-34	26229	T	A	0.1753	0.0132	TRUE	34	-+----?----------+-----++-?--------+	65.8	96.6048	3.726e-08	0.0087343	0.144723	0.0207511	3.08e-12	0.0335316	2.85e-05	547	FALSE	1
	cg14927745-chr2:241643273:SNP	cg14927745				Island	chr2	241562485	chr2:241643273:SNP	rs4676380	80788	-0.15855	0.0088644	1.51e-71	26796	G	T	0.3808	0.0239	TRUE	34	+++++++++++++++-++?++++?++++++++++++	0	32.8117	0.4765	0	-0.15855	0.0088644	1.51e-71	0.0088644	1.51e-71	547	FALSE	1
	cg14927745-chr2:241447578:SNP	cg14927745				Island	chr2	241562485	chr2:241447578:SNP	rs12471846	114907	0.0943777	0.0096652	1.6e-22	27234	T	C	0.2711	0.0365	TRUE	35	+++++++++++-+++-++-+++++?++++++-++++	41.1	57.6775	0.006827	0.0023059	0.0886736	0.013201	1.85e-11	0.016396	8.61e-09	547	FALSE	1
	cg14927745-chr2:241527785:SNP	cg14927745				Island	chr2	241562485	chr2:241527785:SNP	rs111280407	34700	-0.38021	0.0173346	1.24e-106	25859	A	C	0.0715	0.0145	TRUE	33	-------?----------------?-?---------	0	22.8087	0.8842	0	-0.38021	0.0173346	1.24e-106	0.0173346	1.24e-106	547	FALSE	1
	cg14927745-chr2:241443878:SNP	cg14927745				Island	chr2	241562485	chr2:241443878:SNP	rs112875526	118607	-0.242166	0.0217246	7.4e-29	25474	C	T	0.045	0.0071	TRUE	32	+++-++++++++++++++-++++??+??+++-++++	22.8	40.1551	0.1256	0.0045258	-0.23561	0.0256828	4.57e-20	0.0281404	7.59e-18	547	FALSE	1
	cg14927745-chr2:241536053:SNP	cg14927745				Island	chr2	241562485	chr2:241536053:SNP	rs2953171	26432	0.141696	0.011397	1.74e-35	25860	T	C	0.1814	0.019	TRUE	33	+-+++++?+++++++++++++++-?+?++++++++-	63.7	88.0892	3.867e-07	0.007632	0.145495	0.020049	3.96e-13	0.0313736	6.29e-06	547	FALSE	1
	cg14927745-chr2:241582438:SNP	cg14927745				Island	chr2	241562485	chr2:241582438:SNP	rs138972392	19953	0.373584	0.0208236	5.71e-72	25960	T	C	0.0465	0.0072	TRUE	33	++++++++++++++++-+++++++?+??++++++++	33.1	47.8102	0.03581	0.007209	0.3824	0.0270793	2.8e-45	0.0311119	3.24e-33	547	FALSE	1
	cg14927745-chr2:241517847:INDEL	cg14927745				Island	chr2	241562485	chr2:241517847:INDEL	chr2.241517847	44638	0.284551	0.0193678	7.26e-49	22807	D	I	0.0637	0.0097	TRUE	30	++++++??+?++++++++++++++?+?++++?++++	51.4	59.6932	0.0006743	0.0121947	0.30271	0.029922	4.66e-24	0.0398665	9.5e-13	547	FALSE	1
	cg14927745-chr2:241581310:SNP	cg14927745				Island	chr2	241562485	chr2:241581310:SNP	rs62186552	18825	0.313141	0.0124553	1.76e-139	14008	C	T	0.3353	0.038	TRUE	20	?--??--???--?--?----???-?-?-?--??---	25.8	25.5998	0.1417	0.0010956	0.31307	0.0149468	2.06e-97	0.0167817	1.06e-77	547	FALSE	1
	cg14927745-chr2:241470058:SNP	cg14927745				Island	chr2	241562485	chr2:241470058:SNP	rs12613288	92427	0.182765	0.0123965	3.4e-49	24562	A	G	0.1597	0.0159	TRUE	32	++++++++++++++++++?+++++++??++?+++++	31.7	45.4039	0.04587	0.0023189	0.176312	0.0157235	3.51e-29	0.0181565	7.8e-24	547	FALSE	1
	cg14927745-chr2:241610897:SNP	cg14927745				Island	chr2	241562485	chr2:241610897:SNP	rs143558998	48412	0.359868	0.0214087	2.08e-63	25223	T	C	0.0461	0.0086	TRUE	32	++++++++++++++++-+++++++?+??+++?++++	27.8	42.9149	0.07548	0.0057593	0.366993	0.0267348	6.98e-43	0.0296372	6.29e-34	547	FALSE	1
	cg14927745-chr2:241525022:SNP	cg14927745				Island	chr2	241562485	chr2:241525022:SNP	rs72999959	37463	0.298465	0.0180849	3.46e-61	26270	A	G	0.0635	0.0095	TRUE	34	++++++?+++++++++++++++++++?+++++++++	54.6	72.7381	8.115e-05	0.0136472	0.315156	0.0287565	5.98e-28	0.0398625	7.03e-14	547	FALSE	1
	cg14927745-chr2:241610497:SNP	cg14927745				Island	chr2	241562485	chr2:241610497:SNP	rs1133726	48012	-0.224721	0.0107599	7.31e-97	24722	G	A	0.2204	0.0126	TRUE	31	+++++++?++++++++++?+++++?+??++++++++	13.9	34.8263	0.249	0.0005862	-0.224613	0.0118966	1.65e-79	0.0124909	2.3e-72	547	FALSE	1
	cg14927745-chr2:241577376:SNP	cg14927745				Island	chr2	241562485	chr2:241577376:SNP	rs35595549	14891	-0.136311	0.0107433	6.89e-37	23369	A	G	0.2448	0.0221	TRUE	30	-------?-?-----+-----?--?-??------+-	12.1	32.9934	0.278	0.0004852	-0.135614	0.0117581	8.93e-31	0.0122227	6.98e-29	547	FALSE	1
	cg14927745-chr2:241529967:SNP	cg14927745				Island	chr2	241562485	chr2:241529967:SNP	rs72999976	32518	0.330831	0.0281402	6.54e-32	18262	A	G	0.0374	0.0099	TRUE	22	++++-+????+??++-++?+??++?+??+++++?+?	55.6	47.3082	0.0008534	0.0225643	0.307044	0.0456073	1.67e-11	0.0633934	1.8e-07	547	FALSE	1
	cg14927745-chr2:241624694:SNP	cg14927745				Island	chr2	241562485	chr2:241624694:SNP	rs4247184	62209	0.244027	0.0193628	2.04e-36	5301	T	C	0.4291	0.0214	TRUE	9	?++???????++?+???+???????+????????++	0	7.56867	0.4767	0	0.244027	0.0193628	2.04e-36	0.0193628	2.04e-36	547	FALSE	1
	cg14927745-chr2:241581309:SNP	cg14927745				Island	chr2	241562485	chr2:241581309:SNP	rs62186551	18824	0.313161	0.0124549	1.66e-139	14008	A	G	0.3353	0.038	TRUE	20	?++??++???++?++?++++???+?+?+?++??+++	25.8	25.6107	0.1414	0.0010973	0.313086	0.01495	2.21e-97	0.0167883	1.18e-77	547	FALSE	1
	cg14927745-chr2:241541150:SNP	cg14927745				Island	chr2	241562485	chr2:241541150:SNP	rs73003707	21335	0.298168	0.0180931	5.14e-61	26271	C	G	0.0634	0.0097	TRUE	34	++++++?+-+++++++++++++++++?+++++++++	55.5	74.2169	5.225e-05	0.0141727	0.315407	0.02908	2.08e-27	0.0406913	2.34e-13	547	FALSE	1
	cg14927745-chr2:241571572:SNP	cg14927745				Island	chr2	241562485	chr2:241571572:SNP	rs2975787	9087	-0.308385	0.0083685	0.00000000000000000000000000000000000000000000000000000000000000000000000000000000000000000000000000000000000000000000000000000000000000000000000000000000000000000000000000000000000000000000000000000000000000000000000000000000000000000000000000000000000000000000000000000000000000000000000000000000286	27227	A	G	0.4687	0.0214	TRUE	35	------------------------?-----------	37	53.9368	0.01624	0.0014565	-0.307578	0.0110491	1.53e-170	0.0132756	2.3e-119	547	FALSE	1
	cg14927745-chr2:241627836:SNP	cg14927745				Island	chr2	241562485	chr2:241627836:SNP	rs1003972	65351	-0.221875	0.0165745	7.25e-41	20556	C	G	0.0999	0.0117	TRUE	26	---????--?----?---?-??-?------------	10.1	27.7961	0.3173	0.0008149	-0.221799	0.0178649	2.16e-35	0.0184282	2.19e-33	547	FALSE	1
	cg14927745-chr2:241610719:SNP	cg14927745				Island	chr2	241562485	chr2:241610719:SNP	rs10198255	48234	-0.158601	0.0087109	4.52e-74	25998	C	T	0.4929	0.0239	TRUE	33	+++++++++++++++-++?+++++++??++++++++	29.1	45.1172	0.06197	0.0010418	-0.15767	0.0108125	3.65e-48	0.0122816	3.77e-38	547	FALSE	1
	cg14927745-chr2:241538935:SNP	cg14927745				Island	chr2	241562485	chr2:241538935:SNP	rs2953169	23550	0.516478	0.0328349	9.49e-56	16175	A	G	0.0306	0.0119	TRUE	19	+++++?++++??+??+?+?+??++???????++?-+	0	14.6905	0.6831	0	0.516478	0.0328349	9.49e-56	0.0328349	9.49e-56	547	FALSE	1
	cg14927745-chr2:241531575:SNP	cg14927745				Island	chr2	241562485	chr2:241531575:SNP	rs3792270	30910	0.29796	0.0180827	5.31e-61	26278	G	A	0.0635	0.0096	TRUE	34	------?-------------------?---------	54.3	72.2433	9.391e-05	0.0134767	0.314771	0.0286664	4.74e-28	0.0395864	5.2e-14	547	FALSE	1
	cg14927745-chr2:241648209:SNP	cg14927745				Island	chr2	241562485	chr2:241648209:SNP	rs4234120	85724	-0.137565	0.0113281	6.2e-34	18246	G	A	0.3133	0.0359	TRUE	24	++++++??+?++++++++?+??+??+??++?++?++	0	20.6033	0.6053	0	-0.137565	0.0113281	6.2e-34	0.0113281	6.2e-34	547	FALSE	1
	cg14927745-chr2:241544852:SNP	cg14927745				Island	chr2	241562485	chr2:241544852:SNP	rs7565704	17633	-0.372436	0.0177254	5.16e-98	23515	C	A	0.0749	0.0128	TRUE	29	+++++++?++++++++++?+?++??+??++++++++	0	20.06	0.8623	0	-0.372436	0.0177254	5.16e-98	0.0177254	5.16e-98	547	FALSE	1
	cg14927745-chr2:241523664:SNP	cg14927745				Island	chr2	241562485	chr2:241523664:SNP	rs139537724	38821	0.298495	0.017778	2.88e-63	27131	A	G	0.0637	0.0095	TRUE	35	++++++++++++++++++++++++++?+++++++++	52.8	71.9629	0.0001552	0.0125727	0.314606	0.0276376	5.07e-30	0.0376282	2.14e-15	547	FALSE	1
	cg14927745-chr2:241576062:SNP	cg14927745				Island	chr2	241562485	chr2:241576062:SNP	rs1864870	13577	0.437155	0.0098816	0	26190	T	G	0.2399	0.0364	TRUE	33	++++++++++++++++++?+++++?+?+++++++++	65.8	93.5181	6.115e-08	0.0062942	0.437302	0.0178609	2.2e-132	0.0288783	9.12e-52	547	FALSE	1
	cg14927745-chr2:241425055:SNP	cg14927745				Island	chr2	241562485	chr2:241425055:SNP	rs111796057	137430	-0.243561	0.0217295	3.69e-29	25475	A	G	0.0446	0.0071	TRUE	32	---+----+---------+----??-??---+----	21.7	39.6028	0.1382	0.0042542	-0.236859	0.0254691	1.41e-20	0.0277596	1.73e-18	547	FALSE	1
	cg14927745-chr2:241437884:SNP	cg14927745				Island	chr2	241562485	chr2:241437884:SNP	rs74541792	124601	-0.0988462	0.0140674	2.12e-12	24462	G	A	0.1206	0.0151	TRUE	31	++++-++?-+-++-++++++++++?+??+++?-++-	0	29.5902	0.4868	0	-0.0988462	0.0140674	2.12e-12	0.0140674	2.12e-12	547	FALSE	1
	cg14927745-chr2:241672186:INDEL	cg14927745				Island	chr2	241562485	chr2:241672186:INDEL	chr2.241672186	109701	-0.14198	0.0112982	3.22e-36	19808	I	D	0.2741	0.048	TRUE	28	+++++++?+?+++++-++?+++?+?+??+++?++++	5.6	28.5889	0.3811	0.000213	-0.142019	0.0117325	9.96e-34	0.0119631	1.73e-32	547	FALSE	1
	cg14927745-chr2:241579108:SNP	cg14927745				Island	chr2	241562485	chr2:241579108:SNP	rs4676406	16623	0.131242	0.0090758	2.14e-47	24390	G	T	0.4541	0.0439	TRUE	32	-------?-?--------------?+?-------+-	55.4	69.5521	8.747e-05	0.0033278	0.132222	0.014333	2.84e-20	0.0203625	1.15e-10	547	FALSE	1
	cg14927745-chr2:241542183:SNP	cg14927745				Island	chr2	241562485	chr2:241542183:SNP	rs113909935	20302	-0.380836	0.0173098	2.8e-107	25110	T	C	0.0732	0.0139	TRUE	32	-------?----------------?-?----?----	0	21.875	0.8869	0	-0.380836	0.0173098	2.8e-107	0.0173098	2.8e-107	547	FALSE	1
	cg14927745-chr2:241597886:SNP	cg14927745				Island	chr2	241562485	chr2:241597886:SNP	rs12466084	35401	0.356603	0.0207882	5.86e-66	25964	T	C	0.0476	0.0085	TRUE	33	++++++++++++++++-+++++++?+??++++++++	32.8	47.6088	0.03736	0.0070937	0.362365	0.0270022	4.63e-41	0.0309283	9.31e-31	547	FALSE	1
	cg14927745-chr2:241525599:INDEL	cg14927745				Island	chr2	241562485	chr2:241525599:INDEL	chr2.241525599	36886	0.286016	0.0193135	1.28e-49	22807	D	I	0.064	0.0095	TRUE	30	++++++??+?++++++++++++++?+?++++?++++	50.3	58.4014	0.0009722	0.011616	0.301908	0.0295187	1.49e-24	0.0388943	1.93e-13	547	FALSE	1
	cg14927745-chr2:241525840:SNP	cg14927745				Island	chr2	241562485	chr2:241525840:SNP	rs56373697	36645	0.297885	0.01808	5.46e-61	26268	T	C	0.0635	0.0096	TRUE	34	++++++?+++++++++++++++++++?+++++++++	54.3	72.2666	9.326e-05	0.0134795	0.314612	0.0286606	4.92e-28	0.0395933	5.33e-14	547	FALSE	1
	cg14927745-chr2:241622002:SNP	cg14927745				Island	chr2	241562485	chr2:241622002:SNP	rs182755222	59517	0.34965	0.0233002	6.67e-51	22617	A	C	0.0439	0.0084	TRUE	27	+++?+?+?++++++++-+?++?++?+??+++?++++	15.5	30.7539	0.2376	0.0027506	0.352069	0.0264238	1.68e-40	0.0275604	7.01e-37	547	FALSE	1
	cg14927745-chr2:241582136:SNP	cg14927745				Island	chr2	241562485	chr2:241582136:SNP	rs12619051	19651	0.276508	0.0090298	6.31e-206	23716	G	T	0.4936	0.0249	TRUE	31	-------?-?--------------?-??--------	65.5	86.9321	1.902e-07	0.0048784	0.276289	0.0162578	9.05e-65	0.0261661	4.22e-26	547	FALSE	1
	cg14927745-chr2:241534876:SNP	cg14927745				Island	chr2	241562485	chr2:241534876:SNP	rs149641338	27609	-0.336556	0.0310027	1.87e-27	21470	A	G	0.0326	0.0205	TRUE	26	------?---------++?+??-??-???---+?--	28.4	34.9342	0.0894	0.0102272	-0.330105	0.0391167	3.2e-17	0.0433222	7.93e-15	547	FALSE	1
	cg14927745-chr2:241559339:SNP	cg14927745				Island	chr2	241562485	chr2:241559339:SNP	rs2953149	3146	-0.367997	0.015813	8.56e-120	20732	A	G	0.1113	0.0232	TRUE	26	----?-????----------??--?-??--------	0	22.3911	0.6131	0	-0.367997	0.015813	8.56e-120	0.015813	8.56e-120	547	FALSE	1
	cg14927745-chr2:241430103:SNP	cg14927745				Island	chr2	241562485	chr2:241430103:SNP	rs115538990	132382	-0.242456	0.0215563	2.38e-29	25984	A	G	0.0447	0.007	TRUE	33	---+----+---------+-----?-??---+----	20.6	40.3209	0.1484	0.0040454	-0.236033	0.0250799	4.9e-21	0.0271616	4.4e-19	547	FALSE	1
	cg14927745-chr2:241594645:SNP	cg14927745				Island	chr2	241562485	chr2:241594645:SNP	rs10933628	32160	0.173653	0.0084539	0	27722	G	C	0.4463	0.0229	TRUE	36	-------------------------+--------+-	55.4	78.4958	3.508e-05	0.0032405	0.174837	0.0133457	3.27e-39	0.0189599	5.24e-20	547	FALSE	1
	cg14927745-chr2:241644175:SNP	cg14927745				Island	chr2	241562485	chr2:241644175:SNP	rs1864869	81690	-0.141971	0.0105762	4.4e-41	21224	T	C	0.3076	0.0253	TRUE	27	------?-+---------?--?-??-??--?--?+-	59.3	63.9034	4.902e-05	0.0044884	-0.144888	0.0175818	1.71e-16	0.0259945	4.72e-08	547	FALSE	1
	cg14927745-chr2:241540849:SNP	cg14927745				Island	chr2	241562485	chr2:241540849:SNP	rs113443535	21636	-0.384031	0.0171881	0	25854	A	G	0.0723	0.0136	TRUE	33	-------?----------------?-?---------	0	21.2617	0.9258	0	-0.384031	0.0171881	1.42e-110	0.0171881	1.42e-110	547	FALSE	1
	cg14927745-chr2:241470735:SNP	cg14927745				Island	chr2	241562485	chr2:241470735:SNP	rs7607996	91750	0.113212	0.0086355	2.88e-39	26472	T	C	0.48	0.0153	TRUE	34	++++++++-++-+++--++++-++-+??+++-++++	30.8	47.6934	0.04714	0.001145	0.108577	0.0108519	1.44e-23	0.0124805	1.18e-19	547	FALSE	1
	cg14927745-chr2:241623560:SNP	cg14927745				Island	chr2	241562485	chr2:241623560:SNP	rs56075923	61075	-0.210028	0.0098969	6.03e-100	19862	T	C	0.4822	0.0187	TRUE	24	---??-??-?--------?-??-??-??--------	52.8	48.7757	0.00133	0.0026924	-0.21672	0.0153476	2.83e-45	0.0209881	1.42e-23	547	FALSE	1
	cg14927745-chr2:241437886:SNP	cg14927745				Island	chr2	241562485	chr2:241437886:SNP	rs79108857	124599	-0.098935	0.0144309	7.09e-12	23003	G	A	0.122	0.0156	TRUE	30	++++-++?+?-++-++++++++++?+??+++?-++-	12.4	33.1108	0.2733	0.000902	-0.0956322	0.0158398	1.57e-09	0.0164765	1.92e-09	547	FALSE	1
	cg14927745-chr2:241423730:SNP	cg14927745				Island	chr2	241562485	chr2:241423730:SNP	rs7340463	138755	-0.125981	0.0115448	1.01e-27	25978	G	T	0.1742	0.0153	TRUE	33	++++++++++++++++++++++++?+??++++++++	0	30.9736	0.5184	0	-0.125981	0.0115448	1.01e-27	0.0115448	1.01e-27	547	FALSE	1
	cg14927745-chr2:241625145:SNP	cg14927745				Island	chr2	241562485	chr2:241625145:SNP	rs142980344	62660	0.338512	0.0228192	8.76e-50	21961	G	A	0.0459	0.0069	TRUE	26	---?-???---+----+-?--?-??-??--------	28.9	35.1545	0.08544	0.0056274	0.338544	0.0286604	3.37e-32	0.032088	5.11e-26	547	FALSE	1
	cg14927745-chr2:241576626:SNP	cg14927745				Island	chr2	241562485	chr2:241576626:SNP	rs4335944	14141	0.431035	0.0098669	0	26211	T	G	0.2407	0.0362	TRUE	33	++++++++++++++++++?+++++?+?+++++++++	64.6	90.442	1.75e-07	0.0059621	0.431392	0.017551	2.1e-133	0.0278869	6.82e-54	547	FALSE	1
	cg14927745-chr2:241627928:SNP	cg14927745				Island	chr2	241562485	chr2:241627928:SNP	rs1560619	65443	-0.196286	0.0090145	4.05e-105	24685	A	G	0.4279	0.0191	TRUE	31	------?--------+--?-----?-??--------	30.8	43.3809	0.05421	0.0011424	-0.193963	0.0113744	3.35e-65	0.0130352	3.05e-51	547	FALSE	1
	cg14927745-chr2:241580614:SNP	cg14927745				Island	chr2	241562485	chr2:241580614:SNP	rs149083947	18129	0.38797	0.0217687	4.74e-71	25204	C	T	0.0431	0.007	TRUE	32	-------?--------+-------?-??--------	30.4	44.5187	0.05498	0.0067372	0.39158	0.027627	1.33e-45	0.0312618	2.3e-35	547	FALSE	1
	cg14927745-chr2:241562105:SNP	cg14927745				Island	chr2	241562485	chr2:241562105:SNP	rs11678793	380	-0.173625	0.018886	3.81e-20	6620	G	A	0.3155	0.032	TRUE	11	?++???????++???+?+???????+??+??+??++	0	8.40423	0.5894	0	-0.173625	0.018886	3.81e-20	0.018886	3.81e-20	547	FALSE	1
	cg14927745-chr2:241544149:SNP	cg14927745				Island	chr2	241562485	chr2:241544149:SNP	rs62187251	18336	-0.407895	0.0297176	7.12e-43	19881	G	C	0.0307	0.005	TRUE	24	+++?????++++?+++++?+??++?+?++++++?++	11.5	25.9969	0.301	0.0028249	-0.408839	0.0324438	2.07e-36	0.0335899	6.22e-34	547	FALSE	1
	cg14927745-chr2:241614268:SNP	cg14927745				Island	chr2	241562485	chr2:241614268:SNP	rs185175756	51783	-0.473287	0.0374867	1.53e-36	16313	T	G	0.0232	0.0033	TRUE	18	---???????-+?--?--?-??-??-???--?----	36.9	26.9377	0.05899	0.015207	-0.475241	0.0501025	2.42e-21	0.0594004	1.62e-15	547	FALSE	1
	cg14927745-chr2:241624163:SNP	cg14927745				Island	chr2	241562485	chr2:241624163:SNP	rs116071694	61678	0.355202	0.0226934	3.21e-55	22717	T	C	0.0452	0.0074	TRUE	27	+++?+??+++++++++-+?++?+??+??++++++++	17	31.3396	0.2159	0.0029211	0.358185	0.025931	2.13e-43	0.0273539	1.48e-38	547	FALSE	1
	cg14927745-chr2:241570092:SNP	cg14927745				Island	chr2	241562485	chr2:241570092:SNP	rs12468453	7607	0.264705	0.0159278	5.08e-62	25972	T	C	0.0817	0.0104	TRUE	33	++-+++++++++++++++++-+++?+??++++++++	75.3	129.735	1.009e-13	0.0259731	0.262127	0.0338938	1.04e-14	0.064575	4.15e-05	547	FALSE	1
	cg14927745-chr2:241601557:SNP	cg14927745				Island	chr2	241562485	chr2:241601557:SNP	rs144863287	39072	-0.321	0.0413594	8.41e-15	19513	T	A	0.017	0.0039	TRUE	22	+++??+???++?+-+?++?++?+??+??++?+-+++	6.4	22.4356	0.3748	0.0026201	-0.319816	0.0432602	1.44e-13	0.0441868	3.74e-13	547	FALSE	1
	cg14927745-chr2:241441625:SNP	cg14927745				Island	chr2	241562485	chr2:241441625:SNP	rs6755083	120860	-0.0985512	0.0139317	1.51e-12	25971	A	C	0.1151	0.0154	TRUE	33	----+--+-----+----------?-??----+--+	0	26.7551	0.7293	0	-0.0985512	0.0139317	1.51e-12	0.0139317	1.51e-12	547	FALSE	1
	cg14927745-chr2:241496567:SNP	cg14927745				Island	chr2	241562485	chr2:241496567:SNP	rs7609147	65918	-0.123239	0.0092439	1.51e-40	23525	G	A	0.4344	0.0145	TRUE	31	++++++??-?+++++--+++++++?+?+++++++++	17.4	36.3244	0.1976	0.0005679	-0.121603	0.0105165	6.34e-31	0.0111926	3.39e-28	547	FALSE	1
	cg14927745-chr2:241533559:SNP	cg14927745				Island	chr2	241562485	chr2:241533559:SNP	rs17846971	28926	-0.24372	0.0191423	3.93e-37	24634	T	C	0.0607	0.0088	TRUE	31	------??+----+-------?--?-?---------	2.4	30.7401	0.4283	0.0002847	-0.242984	0.0194866	1.1e-35	0.0196146	1.9e-35	547	FALSE	1
	cg14927745-chr2:241424879:SNP	cg14927745				Island	chr2	241562485	chr2:241424879:SNP	rs75488792	137606	-0.131879	0.0092334	2.8e-46	26646	C	T	0.3227	0.0182	TRUE	34	+++++++++++++++-++++++++?+?+++++++++	4.9	34.7148	0.3862	0.0001527	-0.131245	0.0095726	8.78e-43	0.0097132	5.46e-42	547	FALSE	1
	cg14927745-chr2:241520234:SNP	cg14927745				Island	chr2	241562485	chr2:241520234:SNP	rs142271436	42251	-0.381767	0.0504047	3.62e-14	8054	C	G	0.0346	0.0167	TRUE	11	???-?-????---????-???????-????-?+?--	0	8.15011	0.6142	0	-0.381767	0.0504047	3.62e-14	0.0504047	3.62e-14	547	FALSE	1
	cg14927745-chr2:241397331:SNP	cg14927745				Island	chr2	241562485	chr2:241397331:SNP	rs13390118	165154	0.175253	0.0135639	3.45e-38	21736	G	C	0.1484	0.0224	TRUE	29	------??+?--------------?-??-----?--	17.2	33.8327	0.2064	0.0011331	0.178665	0.0154476	6.14e-31	0.0163894	1.1e-26	547	FALSE	1
	cg14927745-chr2:241550303:SNP	cg14927745				Island	chr2	241562485	chr2:241550303:SNP	rs111296426	12182	-0.341858	0.0141837	2.37e-128	25257	A	G	0.1156	0.0322	TRUE	32	--------------------?---?-??--------	3.4	32.1016	0.4118	0.0002325	-0.34126	0.0145572	1.57e-121	0.0146877	7.92e-120	547	FALSE	1
	cg14927745-chr2:241553993:SNP	cg14927745				Island	chr2	241562485	chr2:241553993:SNP	rs2953147	8492	0.187842	0.0104979	1.33e-71	23003	T	C	0.2609	0.0232	TRUE	30	+++++++?+?++++++++++?+++?+??++++++-+	19.3	35.926	0.1757	0.0008036	0.18933	0.0121119	4.43e-55	0.0130051	2.74e-47	547	FALSE	1
	cg14927745-chr2:241557933:SNP	cg14927745				Island	chr2	241562485	chr2:241557933:SNP	rs146929875	4552	0.559308	0.0444338	2.48e-36	11779	T	C	0.0218	0.0051	TRUE	15	++++++?????+?????+???++??????+?++?++	39.6	23.1672	0.0576	0.0206926	0.583309	0.0620883	5.73e-21	0.073529	2.81e-14	547	FALSE	1
	cg14927745-chr2:241537047:SNP	cg14927745				Island	chr2	241562485	chr2:241537047:SNP	rs56960757	25438	0.142358	0.0112751	1.52e-36	27141	T	C	0.1753	0.0135	TRUE	35	+-+++++++++++++++++++++--+?++++++++-	65.3	97.923	4.162e-08	0.0084903	0.146648	0.0202333	4.23e-13	0.0324733	1.17e-05	547	FALSE	1
	cg14927745-chr2:241581307:SNP	cg14927745				Island	chr2	241562485	chr2:241581307:SNP	rs62186550	18822	0.313161	0.0124549	1.66e-139	14008	C	T	0.3353	0.038	TRUE	20	?--??--???--?--?----???-?-?-?--??---	25.8	25.6107	0.1414	0.0010973	0.313086	0.01495	2.21e-97	0.0167883	1.18e-77	547	FALSE	1
	cg14927745-chr2:241623625:SNP	cg14927745				Island	chr2	241562485	chr2:241623625:SNP	rs144381934	61140	0.355228	0.0222415	2.02e-57	23223	A	C	0.0461	0.0078	TRUE	28	+++?+??+++++++++-+?++?++?+??++++++++	15.7	32.0363	0.2307	0.0026398	0.358657	0.0251377	3.48e-46	0.0263902	2.67e-41	547	FALSE	1
	cg14927745-chr2:241437278:SNP	cg14927745				Island	chr2	241562485	chr2:241437278:SNP	rs73104100	125207	-0.130744	0.0092216	1.25e-45	26635	A	G	0.324	0.0184	TRUE	34	------------------------?-?---------	0	32.128	0.5103	0	-0.130744	0.0092216	1.25e-45	0.0092216	1.25e-45	547	FALSE	1
	cg14927745-chr2:241584954:SNP	cg14927745				Island	chr2	241562485	chr2:241584954:SNP	rs55971662	22469	-0.166016	0.0091798	4.2e-73	23724	T	C	0.4389	0.0219	TRUE	31	-------?-?-+----+-------?+??--------	69.4	97.9235	3.939e-09	0.0060128	-0.167153	0.0174981	1.26e-21	0.029964	3.02e-08	547	FALSE	1
	cg14927745-chr2:241558146:SNP	cg14927745				Island	chr2	241562485	chr2:241558146:SNP	rs2953148	4339	0.192363	0.010491	4.28e-75	22995	A	G	0.261	0.0225	TRUE	30	+++++++?+?++++++++++?+++?+??++++++++	15.3	34.2223	0.2312	0.0006051	0.193703	0.011749	4.57e-61	0.0123803	1.92e-54	547	FALSE	1
	cg14927745-chr2:241568631:SNP	cg14927745				Island	chr2	241562485	chr2:241568631:SNP	rs2953155	6146	0.2687	0.0087055	3.45e-209	25870	A	G	0.4217	0.0249	TRUE	33	+++++++?++++++++++++++++?+?+++++++++	51.9	66.5808	0.0003193	0.0027433	0.267795	0.0132703	1.47e-90	0.018113	8.75e-50	547	FALSE	1
	cg14927745-chr2:241531163:SNP	cg14927745				Island	chr2	241562485	chr2:241531163:SNP	rs2975760	31322	0.141417	0.0114587	5.42e-35	26279	C	T	0.1749	0.0134	TRUE	34	-+----?----------------++-?--------+	66	96.9637	3.293e-08	0.0087911	0.145756	0.0208029	2.44e-12	0.0336691	2.67e-05	547	FALSE	1
	cg14927745-chr2:241429712:SNP	cg14927745				Island	chr2	241562485	chr2:241429712:SNP	rs77550598	132773	-0.0968933	0.0139107	3.28e-12	25984	G	A	0.1151	0.0148	TRUE	33	++++-++-+++++-++++++++++?+??++++-++-	0	27.6563	0.6862	0	-0.0968933	0.0139107	3.28e-12	0.0139107	3.28e-12	547	FALSE	1
	cg14927745-chr2:241630341:SNP	cg14927745				Island	chr2	241562485	chr2:241630341:SNP	rs71363915	67856	0.283813	0.015173	4.5e-78	10311	T	C	0.2884	0.0214	TRUE	15	?++???????++?++?++?+???+?+???++???-+	74.3	54.4876	1.06e-06	0.010275	0.29033	0.0319281	9.61e-20	0.0590528	1.54e-06	547	FALSE	1
	cg14927745-chr2:241527282:SNP	cg14927745				Island	chr2	241562485	chr2:241527282:SNP	rs67940783	35203	0.141733	0.0114792	5.06e-35	26253	A	G	0.1743	0.0137	TRUE	34	+-++++?++++++++++++++++--+?++++++++-	66.2	97.5256	2.712e-08	0.0089004	0.145605	0.0208961	3.21e-12	0.0339248	2.94e-05	547	FALSE	1
	cg14927745-chr2:241562515:SNP	cg14927745				Island	chr2	241562485	chr2:241562515:SNP	rs2975778	30	0.396379	0.0202195	1.44e-85	6491	T	C	0.2388	0.0127	TRUE	12	????+??+++?+???++????????+??+??+??++	0	5.00826	0.9308	0	0.396379	0.0202195	1.44e-85	0.0202195	1.44e-85	547	FALSE	1
	cg14927745-chr2:241552482:SNP	cg14927745				Island	chr2	241562485	chr2:241552482:SNP	rs73005866	10003	0.300277	0.0181505	1.78e-61	26232	T	C	0.0629	0.0097	TRUE	34	++++++?+-+++++++++++++++++?+++++++++	54.6	72.7494	8.088e-05	0.0137543	0.316531	0.0288746	5.8e-28	0.0400132	6.17e-14	547	FALSE	1
	cg14927745-chr2:241600894:SNP	cg14927745				Island	chr2	241562485	chr2:241600894:SNP	rs139391769	38409	0.356611	0.0206935	1.5e-66	25959	T	C	0.0477	0.0083	TRUE	33	++++++++++++++++-+++++++?+??++++++++	26.1	43.287	0.08791	0.00508	0.362734	0.0253918	2.7e-46	0.0279925	3.57e-37	547	FALSE	1
	cg14927745-chr2:241622721:SNP	cg14927745				Island	chr2	241562485	chr2:241622721:SNP	rs1864866	60236	0.277693	0.013885	0	12045	T	C	0.2938	0.0183	TRUE	17	?++??+????++?++?++?+???+?+???++??+-+	78.3	73.6979	2.226e-09	0.0120751	0.282134	0.0314878	3.24e-19	0.0639559	1.41e-05	547	TRUE	1
	cg14927745-chr2:241594660:SNP	cg14927745				Island	chr2	241562485	chr2:241594660:SNP	rs10933629	32175	0.176913	0.0145248	3.97e-34	24303	G	C	0.1095	0.0094	TRUE	31	----+-??-------+--------?-??+---+---	69.8	99.4293	2.285e-09	0.0154172	0.168834	0.0281895	2.11e-09	0.0481396	0.0002379	547	FALSE	1
	cg14927745-chr2:241560708:SNP	cg14927745				Island	chr2	241562485	chr2:241560708:SNP	rs4234122	1777	-0.28622	0.0106234	6.98e-160	19601	G	A	0.3326	0.0148	TRUE	26	++++?+??+?++?+++++++?+++?+??+++++?++	43.4	44.163	0.0104	0.002299	-0.286808	0.0150191	2.72e-81	0.0187663	1.6e-52	547	FALSE	1
	cg14927745-chr2:241512470:SNP	cg14927745				Island	chr2	241562485	chr2:241512470:SNP	rs2001823	50015	0.127585	0.014432	9.54e-19	12363	G	T	0.2699	0.0355	TRUE	18	---?-??-?---?-?-+-???????-??-??--?--	11.6	19.2412	0.3149	0.0005069	0.126743	0.0157143	7.3e-16	0.0163347	5.69e-15	547	FALSE	1
	cg14927745-chr2:241613631:SNP	cg14927745				Island	chr2	241562485	chr2:241613631:SNP	rs114618010	51146	0.364669	0.0220646	2.33e-61	24182	A	G	0.0445	0.008	TRUE	30	+++++?++++++++++-+?+++++?+??+++?++++	28.1	40.359	0.07824	0.0058506	0.371831	0.0276331	2.84e-41	0.030707	1.58e-32	547	FALSE	1
	cg14927745-chr2:241590212:SNP	cg14927745				Island	chr2	241562485	chr2:241590212:SNP	rs115736589	27727	0.356426	0.0205648	2.7e-67	25955	A	C	0.0479	0.0079	TRUE	33	++++++++++++++++-+++++++?+??++++++++	31.4	46.65	0.04557	0.0065099	0.363629	0.0263313	2.23e-43	0.0299796	1.35e-32	547	FALSE	1
	cg14927745-chr2:241612312:SNP	cg14927745				Island	chr2	241562485	chr2:241612312:SNP	rs138665774	49827	0.349769	0.0214426	0	23963	G	C	0.0477	0.0075	TRUE	30	------??--------+----?--?-??--------	28.8	40.7126	0.07294	0.0056878	0.354758	0.0268924	9.79e-40	0.030103	3.3e-31	547	FALSE	1
	cg14927745-chr2:241583739:SNP	cg14927745				Island	chr2	241562485	chr2:241583739:SNP	rs62186556	21254	-0.236557	0.0092907	5.23e-143	23724	G	A	0.3889	0.0209	TRUE	31	+++++++?+?+++++-++++++++?+??++++++++	43.4	52.9671	0.005979	0.0020841	-0.234057	0.0130576	7.53e-72	0.0164034	3.8e-47	547	FALSE	1
	cg14927745-chr2:241571386:INDEL	cg14927745				Island	chr2	241562485	chr2:241571386:INDEL	chr2.241571386	8901	0.270112	0.0108018	5.22e-138	16769	D	I	0.4198	0.0219	TRUE	21	?++??++???++?++?++++??++?+?+?++??+++	56.3	45.8094	0.000856	0.0032502	0.265717	0.0175007	4.57e-52	0.0247411	9.51e-28	547	FALSE	1
	cg14927745-chr2:241561774:SNP	cg14927745				Island	chr2	241562485	chr2:241561774:SNP	rs11676358	711	-0.238926	0.0157858	9.45e-52	14107	T	C	0.1662	0.0086	TRUE	19	?--?-??-----???---????-??----??-??--	44.5	32.4065	0.01967	0.0039326	-0.238064	0.0227756	1.43e-25	0.0284202	4.21e-17	547	FALSE	1
	cg14927745-chr2:241585584:SNP	cg14927745				Island	chr2	241562485	chr2:241585584:SNP	rs4676401	23099	0.39088	0.0094581	0	27731	G	T	0.2543	0.0363	TRUE	36	------------------------------------	56.9	81.1754	1.565e-05	0.0043079	0.393125	0.0151877	9.99e-148	0.0219361	5.03e-71	547	FALSE	1
	cg14927745-chr2:241542801:SNP	cg14927745				Island	chr2	241562485	chr2:241542801:SNP	rs75659535	19684	-0.380821	0.0171921	1.02e-108	25849	G	C	0.0723	0.0137	TRUE	33	+++++++?++++++++++++++++?+?+++++++++	0	20.8413	0.9351	0	-0.380821	0.0171921	1.02e-108	0.0171921	1.02e-108	547	FALSE	1
	cg14927745-chr2:241648823:SNP	cg14927745				Island	chr2	241562485	chr2:241648823:SNP	rs4456706	86338	0.216472	0.0104302	1.12e-95	20105	G	A	0.3357	0.0211	TRUE	29	------??-?------------?-?-??------+-	21.7	35.7663	0.1486	0.0008853	0.216459	0.0121262	2.86e-71	0.0133232	2.32e-59	547	FALSE	1
	cg14927745-chr2:241526259:SNP	cg14927745				Island	chr2	241562485	chr2:241526259:SNP	rs55650580	36226	0.137379	0.0116364	3.64e-32	25440	A	T	0.1753	0.0133	TRUE	33	+-++-+??+++++++++-+++++--+?++++++++-	67.4	98.3064	1.156e-08	0.0094146	0.141434	0.0216231	6.12e-11	0.035748	0.0001216	547	FALSE	1
	cg14927745-chr2:241561823:SNP	cg14927745				Island	chr2	241562485	chr2:241561823:SNP	rs2975777	662	0.485787	0.0121772	0	16035	G	C	0.256	0.0263	TRUE	20	---??-????--?-?---?-??-??-??-----?--	51	38.813	0.00467	0.0032026	0.489047	0.0188225	7.91e-149	0.0248755	6.26e-85	547	FALSE	1
	cg14927745-chr2:241624695:SNP	cg14927745				Island	chr2	241562485	chr2:241624695:SNP	rs4247185	62210	0.244027	0.0193628	2.04e-36	5301	T	C	0.4291	0.0214	TRUE	9	?++???????++?+???+???????+????????++	0	7.56867	0.4767	0	0.244027	0.0193628	2.04e-36	0.0193628	2.04e-36	547	FALSE	1
	cg14927745-chr2:241631413:SNP	cg14927745				Island	chr2	241562485	chr2:241631413:SNP	rs71428454	68928	0.236292	0.0121296	1.61e-84	15152	G	T	0.3191	0.0158	TRUE	21	---?????-?--------?-???-?+??---?-?+-	70.9	68.6444	3.027e-07	0.0076584	0.231592	0.0237489	1.81e-22	0.0416315	1.38e-08	547	FALSE	1
	cg14927745-chr2:241658750:SNP	cg14927745				Island	chr2	241562485	chr2:241658750:SNP	rs115289396	96265	0.432398	0.0351897	1.06e-34	10481	T	C	0.0412	0.0064	TRUE	13	+++?+??????+?++??+???????????++++??+	31.9	17.6181	0.1278	0.0077823	0.43834	0.0448144	1.36e-22	0.0516646	5.8e-17	547	FALSE	1
	cg14927745-chr2:241598667:SNP	cg14927745				Island	chr2	241562485	chr2:241598667:SNP	rs59587670	36182	-0.226311	0.0107139	4.87e-99	24731	T	G	0.2222	0.0114	TRUE	31	-------?----------?-----?-??--------	10.1	33.3873	0.306	0.0004079	-0.226071	0.0115329	1.48e-85	0.0119236	2.49e-80	547	FALSE	1
	cg14927745-chr2:241456458:SNP	cg14927745				Island	chr2	241562485	chr2:241456458:SNP	rs4676353	106027	0.494642	0.0524017	3.75e-21	8181	T	C	0.0245	0.0059	TRUE	12	+???+????+???-?+++?+???+????????+?-+	0	10.4739	0.4883	0	0.494642	0.0524017	3.75e-21	0.0524017	3.75e-21	547	FALSE	1
	cg14927745-chr2:241467664:SNP	cg14927745				Island	chr2	241562485	chr2:241467664:SNP	rs7607949	94821	-0.16842	0.0117708	1.94e-46	26396	T	C	0.1645	0.0235	TRUE	34	------?----+----+-------?-----------	12.3	37.6376	0.2652	0.0006716	-0.16765	0.0128809	1e-38	0.013425	4.22e-36	547	FALSE	1
	cg14927745-chr2:241629845:SNP	cg14927745				Island	chr2	241562485	chr2:241629845:SNP	rs2288754	67360	-0.221401	0.010248	1.63e-103	18831	A	C	0.4703	0.0287	TRUE	26	---?--??-?-----+--?--??-?-??--------	42.3	43.355	0.01279	0.0020324	-0.214768	0.0141217	3.11e-52	0.017772	1.27e-35	547	FALSE	1
	cg14927745-chr2:241644740:SNP	cg14927745				Island	chr2	241562485	chr2:241644740:SNP	rs1583261	82255	-0.140475	0.0094982	1.71e-49	24617	T	C	0.3447	0.0221	TRUE	31	------??----------?----??-----------	13	34.4952	0.2615	0.0004254	-0.140563	0.010439	2.51e-41	0.0109215	7.33e-38	547	FALSE	1
	cg14927745-chr2:241594381:INDEL	cg14927745				Island	chr2	241562485	chr2:241594381:INDEL	chr2.241594381	31896	0.34834	0.0220706	4.07e-56	22142	D	I	0.0486	0.0077	TRUE	29	++++++??+?++++++-+++++++?+??+++?++++	35.3	43.2767	0.03272	0.0078989	0.355663	0.0294736	1.58e-33	0.0341122	1.76e-24	547	FALSE	1
	cg14927745-chr2:241623471:SNP	cg14927745				Island	chr2	241562485	chr2:241623471:SNP	rs74593757	60986	-0.242237	0.0114814	8.25e-99	22207	A	G	0.2178	0.0269	TRUE	28	-------?-?--------?--?--?-??---?----	35.1	41.5712	0.03626	0.002028	-0.240453	0.0149879	6.38e-58	0.0176775	9.73e-43	547	FALSE	1
	cg14927745-chr2:241539943:SNP	cg14927745				Island	chr2	241562485	chr2:241539943:SNP	rs74733171	22542	0.297654	0.0180847	7.24e-61	26275	T	C	0.0635	0.0096	TRUE	34	++++++?+++++++++++++++++++?+++++++++	54.7	72.8752	7.792e-05	0.0136978	0.314367	0.0287983	9.65e-28	0.0399371	9.12e-14	547	FALSE	1
	cg14927745-chr2:241546271:SNP	cg14927745				Island	chr2	241562485	chr2:241546271:SNP	rs6725511	16214	0.272788	0.0220574	3.93e-35	17901	G	T	0.062	0.01	TRUE	24	--?--??-+-----?----?---??-??-??--?--	59.3	56.4605	0.000122	0.017605	0.300208	0.0377866	1.95e-15	0.0541466	4.71e-07	547	FALSE	1
	cg14927745-chr2:241536126:SNP	cg14927745				Island	chr2	241562485	chr2:241536126:SNP	rs7607759	26359	0.142562	0.0112753	1.21e-36	27141	G	A	0.1751	0.0134	TRUE	35	-+---------------------++-?--------+	65.2	97.635	4.592e-08	0.0084523	0.146731	0.0202044	3.81e-13	0.0323782	1.07e-05	547	FALSE	1
	cg14927745-chr2:241566429:SNP	cg14927745				Island	chr2	241562485	chr2:241566429:SNP	rs2975781	3944	-0.308627	0.0083677	0.000000000000000000000000000000000000000000000000000000000000000000000000000000000000000000000000000000000000000000000000000000000000000000000000000000000000000000000000000000000000000000000000000000000000000000000000000000000000000000000000000000000000000000000000000000000000000000000000000000000856	27257	T	C	0.4679	0.0207	TRUE	35	------------------------?-----------	37.9	54.7248	0.0136	0.0015138	-0.307812	0.0111342	3.16e-168	0.0134682	3.27e-116	547	FALSE	1
	cg14927745-chr2:241606882:SNP	cg14927745				Island	chr2	241562485	chr2:241606882:SNP	rs80015647	44397	0.360924	0.0209431	1.49e-66	25100	G	A	0.0479	0.0077	TRUE	32	------?---------+-------?-??--------	27.8	42.9481	0.075	0.0055168	0.368269	0.026072	2.66e-45	0.0290151	1.6e-35	547	FALSE	1
	cg14927745-chr2:241540229:SNP	cg14927745				Island	chr2	241562485	chr2:241540229:SNP	rs60001881	22256	0.296567	0.0180397	9.95e-61	26272	T	G	0.0638	0.0096	TRUE	34	++++++?+-+++++++++++++++++?+++++++++	55.4	73.9905	5.591e-05	0.014009	0.313384	0.0289401	2.52e-27	0.0404475	2.27e-13	547	FALSE	1
	cg14927745-chr2:241570977:SNP	cg14927745				Island	chr2	241562485	chr2:241570977:SNP	rs72996949	8492	0.264025	0.0159348	1.17e-61	25957	A	G	0.0816	0.0104	TRUE	33	++-+++++++++++++++++-+++?+??++++++++	75.5	130.378	7.871e-14	0.0261664	0.261406	0.0339858	1.45e-14	0.0649234	4.77e-05	547	FALSE	1
	cg14927745-chr2:241603865:INDEL	cg14927745				Island	chr2	241562485	chr2:241603865:INDEL	chr2.241603865	41380	0.414974	0.0151333	1.53e-165	9815	I	D	0.2835	0.0254	TRUE	13	?--???????--?-??--?-??-??-???-????--	46.5	22.4164	0.03311	0.0028005	0.419795	0.0230938	7.74e-74	0.0282696	8.76e-49	547	FALSE	1
	cg14927745-chr2:241599745:SNP	cg14927745				Island	chr2	241562485	chr2:241599745:SNP	rs6715444	37260	0.380484	0.0099332	0.00000000000000000000000000000000000000000000000000000000000000000000000000000000000000000000000000000000000000000000000000000000000000000000000000000000000000000000000000000000000000000000000000000000000000000000000000000000000000000000000000000000000000000000000000000000000000000000000000000000000000000000000000000000521239256362515	25408	G	A	0.2524	0.0349	TRUE	32	-------?----------?-----?-?---------	56.5	71.335	5.098e-05	0.0041758	0.382373	0.0159599	7.55e-127	0.0228576	3.24e-62	547	FALSE	1
	cg14927745-chr2:241582043:SNP	cg14927745				Island	chr2	241562485	chr2:241582043:SNP	rs12621598	19558	0.375231	0.0093739	0	24388	C	T	0.3255	0.0355	TRUE	32	-------?-?--------------?-?---------	52.1	64.7755	0.0003559	0.0031163	0.375837	0.014368	7.99e-151	0.019587	8.43e-82	547	FALSE	1
	cg14927745-chr2:241584989:SNP	cg14927745				Island	chr2	241562485	chr2:241584989:SNP	rs75047648	22504	0.359596	0.0204937	6.31e-69	25960	T	C	0.0481	0.0078	TRUE	33	++++++++++++++++-+++++++?+??++++++++	32.3	47.2899	0.03993	0.0067475	0.367515	0.0264388	6.28e-44	0.0302857	1.63e-32	547	FALSE	1
	cg14927745-chr2:241599525:SNP	cg14927745				Island	chr2	241562485	chr2:241599525:SNP	rs111796058	37040	-0.228596	0.0110627	7.37e-95	23289	T	C	0.2214	0.0114	TRUE	30	-------?-?--------?-----?-??--------	11.9	32.9244	0.2808	0.0005051	-0.228276	0.0120723	9.6e-80	0.0125598	5.11e-74	547	FALSE	1
	cg14927745-chr2:241720990:INDEL	cg14927745				Island	chr2	241562485	chr2:241720990:INDEL	chr2.241720990	158505	0.287554	0.0325147	9.25e-19	11240	D	I	0.0481	0.0121	TRUE	17	+++?++??+??+?++-?+???????+??++??+?-+	27.8	22.1642	0.138	0.0071573	0.280926	0.0404916	3.98e-12	0.0450413	1.72e-10	547	FALSE	1
	cg14927745-chr2:241453298:SNP	cg14927745				Island	chr2	241562485	chr2:241453298:SNP	rs60904131	109187	-0.100193	0.0138281	4.3e-13	25981	A	G	0.1169	0.0147	TRUE	33	----+--+--+--+----------?-??----+--+	6.7	34.3148	0.3573	0.0004637	-0.0987204	0.0145412	1.13e-11	0.0148283	1.41e-11	547	FALSE	1
	cg14927745-chr2:241540110:SNP	cg14927745				Island	chr2	241562485	chr2:241540110:SNP	rs12616820	22375	0.14138	0.0115148	1.19e-34	25827	G	A	0.1767	0.0128	TRUE	33	-+-----?---------------+?-?--------+	65.6	92.9922	7.327e-08	0.0084745	0.148364	0.0207973	9.77e-13	0.033462	2.39e-05	547	FALSE	1
	cg14927745-chr2:241588985:SNP	cg14927745				Island	chr2	241562485	chr2:241588985:SNP	rs6749767	26500	-0.200682	0.0088059	5.82e-115	26427	G	A	0.4228	0.0377	TRUE	34	+++++++?++++++++++++++++?+++++++++++	0.3	33.087	0.463	7e-06	-0.200682	0.0088226	1.56e-114	0.0088291	2.28e-114	547	FALSE	1
	cg14927745-chr2:241446785:SNP	cg14927745				Island	chr2	241562485	chr2:241446785:SNP	rs113358855	115700	-0.247275	0.0220354	3.19e-29	24751	T	C	0.0452	0.0073	TRUE	31	---+--------------+----??-??---?----	18.8	36.9245	0.1794	0.0035299	-0.242509	0.0253149	9.73e-22	0.0271216	7.7e-20	547	FALSE	1
	cg14927745-chr2:241592761:SNP	cg14927745				Island	chr2	241562485	chr2:241592761:SNP	rs60527163	30276	-0.25098	0.0111113	5.72e-113	23286	C	A	0.218	0.0119	TRUE	30	+++++++?+?++++++++?+++++?+??++++++++	25	38.6722	0.1081	0.0012553	-0.249141	0.0133526	1.07e-77	0.0148172	2.34e-64	547	FALSE	1
	cg14927745-chr2:241538061:SNP	cg14927745				Island	chr2	241562485	chr2:241538061:SNP	rs55878652	24424	0.141822	0.0112743	2.75e-36	27136	C	T	0.1753	0.0135	TRUE	35	-+---------------------++-?--------+	65.3	98.112	3.902e-08	0.0085144	0.146497	0.0202519	4.7e-13	0.0325336	1.31e-05	547	FALSE	1
	cg14927745-chr2:241671438:SNP	cg14927745				Island	chr2	241562485	chr2:241671438:SNP	rs113611270	108953	0.132064	0.0196799	1.94e-11	6538	A	G	0.7332	0.0255	TRUE	9	+??++???+???+??-????+???????+???+???	14.8	9.38605	0.3108	0.0006276	0.128309	0.0217636	3.73e-09	0.0230896	1.07e-08	547	FALSE	1
	cg14927745-chr2:241609803:SNP	cg14927745				Island	chr2	241562485	chr2:241609803:SNP	rs4676338	47318	-0.158893	0.0087096	2.34e-74	26009	A	G	0.4929	0.0239	TRUE	33	---------------+--?-------??--------	28.4	44.6865	0.0674	0.0010073	-0.158025	0.0107533	6.89e-49	0.0121626	5.28e-39	547	FALSE	1
	cg14927745-chr2:241563643:INDEL	cg14927745				Island	chr2	241562485	chr2:241563643:INDEL	chr2.241563643	1158	0.249208	0.0117636	1.32e-99	14182	D	I	0.4329	0.0222	TRUE	18	?++??++???++?++?++?+??++?+???+???+++	51.8	35.2713	0.00573	0.0027799	0.245228	0.018296	5.78e-41	0.024407	1.78e-24	547	FALSE	1
	cg14927745-chr2:241479946:SNP	cg14927745				Island	chr2	241562485	chr2:241479946:SNP	rs13406305	82539	-0.168973	0.0115882	3.69e-48	27256	A	G	0.1643	0.023	TRUE	35	-----------+----+-------?-----------	9.4	37.5175	0.311	0.0004928	-0.168393	0.0124043	5.61e-42	0.0127871	7.25e-40	547	FALSE	1
	cg14927745-chr2:241543863:SNP	cg14927745				Island	chr2	241562485	chr2:241543863:SNP	rs66815376	18622	0.296797	0.0180742	1.35e-60	26262	T	C	0.063	0.0093	TRUE	34	++++++?+-+++++++++++++++++?+++++++++	56.3	75.5717	3.474e-05	0.0146045	0.313832	0.0293065	9.28e-27	0.0413909	7.47e-13	547	FALSE	1
	cg14927745-chr2:241526428:SNP	cg14927745				Island	chr2	241562485	chr2:241526428:SNP	rs138005500	36057	0.55501	0.0508827	1.06e-27	10230	G	C	0.0231	0.012	TRUE	14	???-?-??-?----??-?-???-??-????-???--	48.3	25.1471	0.02208	0.0367837	0.57007	0.0808147	1.74e-12	0.0984272	1.71e-08	547	FALSE	1
	cg14927745-chr2:241551402:SNP	cg14927745				Island	chr2	241562485	chr2:241551402:SNP	rs2953158	11083	-0.346334	0.0143905	5.56e-128	24404	G	A	0.1166	0.0324	TRUE	31	++++++?+++++++++++++?+++?+??++++++++	2.1	30.6393	0.4333	0.0001392	-0.345991	0.0146224	8.95e-124	0.0146971	8.87e-123	547	FALSE	1
	cg14927745-chr2:241460880:SNP	cg14927745				Island	chr2	241562485	chr2:241460880:SNP	rs13009981	101605	0.180899	0.0124186	4.57e-48	24548	C	T	0.1595	0.0165	TRUE	32	------------------?-------??--?-----	29.4	43.9013	0.06222	0.002085	0.174727	0.015471	1.41e-29	0.0175869	8.15e-25	547	FALSE	1
	cg14927745-chr2:241421980:SNP	cg14927745				Island	chr2	241562485	chr2:241421980:SNP	rs7340350	140505	-0.122172	0.0090245	9.36e-42	27137	A	C	0.3372	0.0169	TRUE	35	--------+------+----------?---------	4.5	35.6199	0.392	0.0001377	-0.121777	0.0093294	6.11e-39	0.0094545	3.38e-38	547	FALSE	1
	cg14927745-chr2:241538924:SNP	cg14927745				Island	chr2	241562485	chr2:241538924:SNP	rs67211173	23561	0.141387	0.0112848	5.18e-36	27121	G	C	0.175	0.0136	TRUE	35	-+---------------------++-?--------+	65.6	98.713	3.177e-08	0.00861	0.146272	0.0203283	6.23e-13	0.0327634	1.59e-05	547	FALSE	1
	cg14927745-chr2:241672254:SNP	cg14927745				Island	chr2	241562485	chr2:241672254:SNP	rs9917266	109769	-0.161167	0.0105566	1.27e-52	23269	A	G	0.2587	0.0441	TRUE	32	---------------+--?---?---??--------	5.5	32.8163	0.378	0.0002112	-0.161189	0.0109585	5.65e-49	0.0111752	3.77e-47	547	FALSE	1
	cg14927745-chr2:241446340:SNP	cg14927745				Island	chr2	241562485	chr2:241446340:SNP	rs4074478	116145	-0.100778	0.0138198	3.05e-13	25968	T	C	0.1172	0.0147	TRUE	33	----+--+--+--+----------?-??----+--+	0	29.2333	0.6073	0	-0.100778	0.0138198	3.05e-13	0.0138198	3.05e-13	547	FALSE	1
	cg14927745-chr2:241631267:SNP	cg14927745				Island	chr2	241562485	chr2:241631267:SNP	rs71428453	68782	0.251622	0.013591	1.6e-76	11948	G	A	0.3215	0.0131	TRUE	17	---???????--?-?---?-?????+??---?-?+-	72.6	58.3488	9.906e-07	0.0085477	0.25139	0.0277327	1.25e-19	0.0495638	3.84e-07	547	FALSE	1
	cg14927745-chr2:241530616:SNP	cg14927745				Island	chr2	241562485	chr2:241530616:SNP	rs2975757	31869	0.141372	0.0114587	5.69e-35	26280	T	A	0.1749	0.0134	TRUE	34	-+----?----------------++-?--------+	66	97.0675	3.177e-08	0.0088053	0.145682	0.0208137	2.57e-12	0.0337052	2.74e-05	547	FALSE	1
	cg14927745-chr2:241611941:SNP	cg14927745				Island	chr2	241562485	chr2:241611941:SNP	rs76999291	49456	-0.205818	0.0143772	1.75e-46	22518	T	C	0.1262	0.0186	TRUE	29	------??-?+----------?--?-??--------	30.2	40.1058	0.06471	0.0026449	-0.203978	0.0181309	2.31e-29	0.0205932	1.61e-23	547	FALSE	1
	cg14927745-chr2:241532559:SNP	cg14927745				Island	chr2	241562485	chr2:241532559:SNP	rs41266975	29926	0.141747	0.0112591	2.41e-36	27141	C	G	0.1758	0.0141	TRUE	35	+-+++++++++++++++++++++--+?++++++++-	65	97.1441	5.427e-08	0.0083626	0.145913	0.0201272	4.18e-13	0.0321692	1.05e-05	547	FALSE	1
	cg14927745-chr2:241556680:SNP	cg14927745				Island	chr2	241562485	chr2:241556680:SNP	rs17846968	5805	-0.323391	0.0199735	0	19733	G	C	0.067	0.0142	TRUE	25	++++++??+?++++++-+?+??+??+??+++++?++	26.5	32.6534	0.1116	0.0036834	-0.324022	0.0245525	9.11e-40	0.0271751	1.18e-32	547	FALSE	1
	cg14927745-chr2:241593157:SNP	cg14927745				Island	chr2	241562485	chr2:241593157:SNP	rs10804411	30672	0.391143	0.0094235	0	27748	A	G	0.2576	0.0357	TRUE	36	++++++++++++++++++++++++++++++++++++	56.8	81.1114	1.596e-05	0.0042707	0.393792	0.0151302	2.45e-149	0.0218387	9.75e-72	547	FALSE	1
	cg14927745-chr2:241527462:SNP	cg14927745				Island	chr2	241562485	chr2:241527462:SNP	rs7596933	35023	0.140917	0.0114595	9.4e-35	26265	T	G	0.1748	0.0136	TRUE	34	+-++++?++++++++++++++++--+?++++++++-	65.8	96.3566	4.058e-08	0.0087087	0.144951	0.0207356	2.74e-12	0.0334605	2.54e-05	547	FALSE	1
	cg14927745-chr2:241419842:SNP	cg14927745				Island	chr2	241562485	chr2:241419842:SNP	rs6739196	142643	-0.122702	0.0091391	4.26e-41	26468	A	G	0.3367	0.017	TRUE	34	--------+------+----------??--------	5.6	34.9532	0.3754	0.0001705	-0.122242	0.009522	1.01e-37	0.00968	8.06e-37	547	FALSE	1
	cg14927745-chr2:241578401:SNP	cg14927745				Island	chr2	241562485	chr2:241578401:SNP	rs62186545	15916	-0.459681	0.0360959	3.78e-37	12078	A	G	0.0343	0.0049	TRUE	15	---?-?????--?-??--????-??-?????--?--	44.8	25.371	0.03108	0.0165987	-0.456069	0.0525384	3.93e-18	0.0654136	2.11e-12	547	FALSE	1
	cg14927745-chr2:241470199:SNP	cg14927745				Island	chr2	241562485	chr2:241470199:SNP	rs11681349	92286	0.183502	0.0123881	1.21e-49	24562	T	C	0.1599	0.0158	TRUE	32	++++++++++++++++++?+++++++??++?+++++	32.8	46.1233	0.03947	0.0024315	0.176637	0.0158521	7.76e-29	0.0184317	2.38e-23	547	FALSE	1
	cg14927745-chr2:241680802:SNP	cg14927745				Island	chr2	241562485	chr2:241680802:SNP	rs56024577	118317	-0.168264	0.011703	7.13e-47	18194	A	G	0.274	0.0385	TRUE	26	------??-?-----+--?--??-?-??-----?--	7.7	27.0987	0.351	0.0003031	-0.168087	0.0123391	2.95e-42	0.0126854	3.73e-40	547	FALSE	1
	cg14927745-chr2:241442027:SNP	cg14927745				Island	chr2	241562485	chr2:241442027:SNP	rs112719197	120458	-0.242645	0.0217584	7.02e-29	25474	T	C	0.0448	0.0071	TRUE	32	---+--------------+----??-??---+----	21.4	39.4488	0.1419	0.0041902	-0.236509	0.0254611	1.56e-20	0.0276885	1.9e-18	547	FALSE	1
	cg14927745-chr2:241566796:SNP	cg14927745				Island	chr2	241562485	chr2:241566796:SNP	rs12477897	4311	0.264842	0.0159091	3.17e-62	25974	A	G	0.0818	0.0104	TRUE	33	++-+++++++++++++++++-+++?+??++++++++	75.3	129.502	1.104e-13	0.0258468	0.262514	0.0338168	8.31e-15	0.064383	3.9e-05	547	FALSE	1
	cg14927745-chr2:241590582:SNP	cg14927745				Island	chr2	241562485	chr2:241590582:SNP	rs78571781	28097	0.330132	0.0203104	2.08e-59	25950	T	C	0.0493	0.0078	TRUE	33	+++++++++++-++++-+++++++?+??++++++++	31.5	46.7308	0.04482	0.0063806	0.334787	0.0259895	5.71e-38	0.0296601	8.91e-29	547	FALSE	1
	cg14927745-chr2:241538074:SNP	cg14927745				Island	chr2	241562485	chr2:241538074:SNP	rs2975766	24411	0.498397	0.0321548	3.47e-54	16210	A	G	0.0316	0.0118	TRUE	19	+++?+?++++??+??+?+?+??++????+??++?-+	0	14.4211	0.7013	0	0.498397	0.0321548	3.47e-54	0.0321548	3.47e-54	547	FALSE	1
	cg14927745-chr2:241608769:SNP	cg14927745				Island	chr2	241562485	chr2:241608769:SNP	rs4676341	46284	-0.15961	0.0087102	5.27e-75	26014	A	G	0.4926	0.0243	TRUE	33	---------------+--?-------??--------	27.5	44.1223	0.07512	0.0009626	-0.158835	0.0106769	4.68e-50	0.0120098	2.65e-40	547	FALSE	1
	cg14927745-chr2:241566511:SNP	cg14927745				Island	chr2	241562485	chr2:241566511:SNP	rs2975782	4026	0.267016	0.0085696	3.91e-213	26633	C	T	0.4226	0.0248	TRUE	34	------------------------?-?---------	50	65.9543	0.0005661	0.002529	0.266126	0.0127798	2.62e-96	0.0171274	8.52e-55	547	FALSE	1
	cg14927745-chr2:241533934:SNP	cg14927745				Island	chr2	241562485	chr2:241533934:SNP	rs17846973	28551	0.29758	0.0180806	7.29e-61	26278	C	T	0.0635	0.0096	TRUE	34	------?-------------------?---------	54.3	72.1695	9.597e-05	0.0134483	0.31423	0.0286487	5.42e-28	0.0395415	5.24e-14	547	FALSE	1
	cg14927745-chr2:241614663:SNP	cg14927745				Island	chr2	241562485	chr2:241614663:SNP	rs55934968	52178	-0.239793	0.0098334	2.43e-131	20157	G	A	0.4776	0.035	TRUE	25	+++?++??+?++++++++?+??++?+??+++?++++	29.9	34.232	0.08063	0.0010535	-0.239349	0.0123679	1.94e-83	0.0140256	1.57e-65	547	FALSE	1
	cg14927745-chr2:241601747:SNP	cg14927745				Island	chr2	241562485	chr2:241601747:SNP	rs6753653	39262	-0.162422	0.0086061	1.91e-79	26659	C	A	0.5009	0.024	TRUE	34	+++++++++++++++-++?+++++++?+++++++++	28.8	46.3751	0.06119	0.0010351	-0.161519	0.0106494	5.86e-52	0.0120942	4.05e-41	547	FALSE	1
	cg14927745-chr2:241439086:SNP	cg14927745				Island	chr2	241562485	chr2:241439086:SNP	rs112035160	123399	-0.242039	0.0215901	3.62e-29	25984	G	A	0.0445	0.0068	TRUE	33	+++-++++++++++++++-+++++?+??+++-++++	16.3	38.2522	0.2067	0.0030493	-0.237047	0.0243327	2e-22	0.0258085	6.7e-21	547	FALSE	1
	cg14927745-chr2:241603380:SNP	cg14927745				Island	chr2	241562485	chr2:241603380:SNP	rs62187776	40895	-0.225121	0.0107139	5.09e-98	24751	A	G	0.2221	0.0117	TRUE	31	-------?----------?-----?-??--------	12.2	34.1747	0.2739	0.0005027	-0.225007	0.011707	2.52e-82	0.0122048	5.69e-76	547	FALSE	1
	cg14927745-chr2:241586575:SNP	cg14927745				Island	chr2	241562485	chr2:241586575:SNP	rs12475646	24090	0.360407	0.0205084	3.92e-69	25958	T	C	0.0481	0.0079	TRUE	33	++++++++++++++++-+++++++?+??++++++++	31.7	46.8746	0.04352	0.0065726	0.368	0.0263201	2.02e-44	0.0300413	3.68e-33	547	FALSE	1
	cg14927745-chr2:241623790:SNP	cg14927745				Island	chr2	241562485	chr2:241623790:SNP	rs115858523	61305	0.354152	0.0226025	2.48e-55	22710	A	C	0.0456	0.0074	TRUE	27	+++?+??+++++++++-+?++?+??+??++++++++	16.5	31.1457	0.2229	0.0027937	0.357852	0.0257452	6.35e-44	0.0270759	4.29e-39	547	FALSE	1
	cg14927745-chr2:241516241:SNP	cg14927745				Island	chr2	241562485	chr2:241516241:SNP	rs76791955	46244	0.295982	0.0181554	9.44e-60	26261	T	C	0.0628	0.0095	TRUE	34	++++++?+++++++++++++++++++?+++++++++	53.4	70.7623	0.0001448	0.0130699	0.313979	0.0284598	2.67e-28	0.0389307	2.9e-14	547	FALSE	1
	cg14927745-chr2:241607616:SNP	cg14927745				Island	chr2	241562485	chr2:241607616:SNP	rs12473981	45131	0.358785	0.0207543	0	25961	C	T	0.0475	0.0083	TRUE	33	----------------+-------?-??--------	26.9	43.7968	0.07991	0.0053414	0.365204	0.0256517	5.4e-46	0.0284054	1.43e-36	547	FALSE	1
	cg14927745-chr2:241586140:SNP	cg14927745				Island	chr2	241562485	chr2:241586140:SNP	rs62187760	23655	-0.24853	0.0111052	6.22e-111	23288	A	G	0.2187	0.0124	TRUE	30	-------?-?--------?-----?-??--------	21.1	36.7432	0.1529	0.0010038	-0.246878	0.0129538	5.61e-81	0.0140704	8.03e-70	547	FALSE	1
	cg14927745-chr2:241541915:SNP	cg14927745				Island	chr2	241562485	chr2:241541915:SNP	rs4676417	20570	-0.169549	0.0110866	8.49e-53	21517	T	G	0.2565	0.0165	TRUE	29	------??-?+-?--+--------?-?------?--	42.8	48.9735	0.0084	0.002718	-0.166382	0.0154728	5.73e-27	0.0193911	2.26e-18	547	FALSE	1
	cg14927745-chr2:241716756:SNP	cg14927745				Island	chr2	241562485	chr2:241716756:SNP	rs111913908	154271	-0.227613	0.025058	1.05e-19	14546	T	C	0.0614	0.0084	TRUE	19	---?--????--?-??--????-??-?---?--?++	0	17.1601	0.5121	0	-0.227613	0.025058	1.05e-19	0.025058	1.05e-19	547	FALSE	1
	cg14927745-chr2:241623951:SNP	cg14927745				Island	chr2	241562485	chr2:241623951:SNP	rs4676384	61466	-0.222957	0.0177776	4.43e-36	17834	T	C	0.1008	0.0111	TRUE	23	---?????-?----?---?-??-??-----?-----	10.6	24.5972	0.3167	0.0008798	-0.223559	0.019278	4.29e-31	0.0198764	3.36e-29	547	FALSE	1
	cg14927745-chr2:241584823:SNP	cg14927745				Island	chr2	241562485	chr2:241584823:SNP	rs10933626	22338	0.23081	0.0086329	1.79e-157	27255	G	A	0.3924	0.0275	TRUE	35	------------------------?+----------	63.4	92.8691	2.287e-07	0.0045811	0.232166	0.0150478	1.05e-53	0.0235803	1.27e-22	547	FALSE	1
	cg14927745-chr2:241578537:SNP	cg14927745				Island	chr2	241562485	chr2:241578537:SNP	rs4676407	16052	0.392542	0.0096899	0	26435	C	G	0.2541	0.0372	TRUE	34	+++++++?++++++++++++++++?+++++++++++	58.1	78.8192	1.282e-05	0.0045008	0.394401	0.015837	6.77e-137	0.0231438	1.6e-64	547	FALSE	1
	cg14927745-chr2:241573641:SNP	cg14927745				Island	chr2	241562485	chr2:241573641:SNP	rs2975791	11156	0.454072	0.0099886	0	25414	T	C	0.2408	0.038	TRUE	32	+++++++?++++++++++?+++++?+?+++++++++	66.4	92.3363	5.194e-08	0.0064249	0.454681	0.0182517	5.56e-137	0.0297519	1.37e-52	547	FALSE	1
	cg14927745-chr2:241445406:SNP	cg14927745				Island	chr2	241562485	chr2:241445406:SNP	rs112110239	117079	-0.260984	0.0220532	2.6e-32	26634	A	T	0.0427	0.0085	TRUE	34	---+--------------+-----?-?---------	21.6	42.0822	0.1336	0.0046156	-0.255308	0.0258419	5.1e-23	0.0281227	1.69e-20	547	FALSE	1
	cg14927745-chr2:241566012:SNP	cg14927745				Island	chr2	241562485	chr2:241566012:SNP	rs2953153	3527	0.267144	0.0085689	2.26e-213	26648	G	A	0.4224	0.0247	TRUE	34	------------------------?-?---------	50.8	67.0823	0.0004137	0.0026152	0.266467	0.01289	6.15e-95	0.0174189	4.37e-53	547	FALSE	1
	cg14927745-chr2:241603393:SNP	cg14927745				Island	chr2	241562485	chr2:241603393:SNP	rs79105947	40908	0.357698	0.0207289	1.01e-66	25962	A	G	0.0475	0.0083	TRUE	33	++++++++++++++++-+++++++?+??++++++++	27.3	43.9994	0.0769	0.0054194	0.363949	0.0256807	1.36e-45	0.0285018	3.97e-36	547	FALSE	1
	cg14927745-chr2:241625799:SNP	cg14927745				Island	chr2	241562485	chr2:241625799:SNP	rs62187799	63314	-0.237249	0.0110298	1.26e-102	23289	T	C	0.2252	0.0227	TRUE	30	-------?-?--------?-----?-??--------	32.1	42.7049	0.04847	0.0017522	-0.236266	0.0140112	8.46e-64	0.0162423	2.54e-48	547	FALSE	1
	cg14927745-chr2:241603534:SNP	cg14927745				Island	chr2	241562485	chr2:241603534:SNP	rs77808004	41049	0.359573	0.0208898	2.13e-66	25096	C	A	0.0481	0.0077	TRUE	32	------?---------+-------?-??--------	29.8	44.1525	0.05918	0.0060419	0.366273	0.0264299	1.13e-43	0.0297528	1.26e-33	547	FALSE	1
	cg14927745-chr2:241534163:SNP	cg14927745				Island	chr2	241562485	chr2:241534163:SNP	rs17846975	28322	0.141838	0.0112644	2.34e-36	27141	A	G	0.1757	0.0139	TRUE	35	+-+++++++++++++++++++++--+?++++++++-	65	97.2751	5.19e-08	0.0083879	0.146	0.0201491	4.29e-13	0.0322277	1.08e-05	547	FALSE	1
	cg14927745-chr2:241593537:INDEL	cg14927745				Island	chr2	241562485	chr2:241593537:INDEL	chr2.241593537	31052	-0.26212	0.0232848	0	15529	D	I	0.8245	0.2673	TRUE	17	?--??--???--?--??---??--?-?-??-??-??	67	48.5063	3.954e-05	0.0194465	-0.290567	0.0435402	2.5e-11	0.0705913	0.0002046	547	FALSE	1
	cg14927745-chr2:241627213:SNP	cg14927745				Island	chr2	241562485	chr2:241627213:SNP	rs115170552	64728	0.345209	0.0227558	5.58e-52	22714	A	G	0.0448	0.0074	TRUE	27	+++?+??+++++++++-+?++?+??+??++++++++	28.2	36.2221	0.08766	0.0056245	0.348727	0.0284631	1.64e-34	0.0317025	1.3e-27	547	FALSE	1
	cg14927745-chr2:241430793:SNP	cg14927745				Island	chr2	241562485	chr2:241430793:SNP	rs57155438	131692	-0.130727	0.0092342	1.7e-45	26647	A	G	0.3221	0.018	TRUE	34	--------+---------------?-?---------	5.7	35.0118	0.3728	0.0001792	-0.130053	0.0096289	1.43e-41	0.0097972	1.3e-40	547	FALSE	1
	cg14927745-chr2:241511566:SNP	cg14927745				Island	chr2	241562485	chr2:241511566:SNP	rs4676423	50919	0.171795	0.013636	0	19230	T	C	0.1714	0.0401	TRUE	25	++++++++++++?+?--+?+??+??+??++?++?++	42.6	41.816	0.01353	0.0035474	0.170727	0.0192887	8.66e-19	0.0237584	4.8e-13	547	FALSE	1
	cg14927745-chr2:241528011:SNP	cg14927745				Island	chr2	241562485	chr2:241528011:SNP	rs12619657	34474	0.141236	0.0114612	6.81e-35	26263	A	G	0.1748	0.0134	TRUE	34	+-++++?++++++++++++++++--+?++++++++-	65.8	96.5687	3.772e-08	0.0087406	0.145458	0.0207636	2.46e-12	0.0335391	2.54e-05	547	FALSE	1
	cg14927745-chr2:241592577:SNP	cg14927745				Island	chr2	241562485	chr2:241592577:SNP	rs141478094	30092	0.359063	0.0205803	3.63e-68	25952	A	C	0.0479	0.008	TRUE	33	++++++++++++++++-+++++++?+??++++++++	29.5	45.3702	0.05896	0.005952	0.367001	0.0259603	2.25e-45	0.0291791	8.46e-35	547	FALSE	1
	cg14927745-chr2:241542703:SNP	cg14927745				Island	chr2	241562485	chr2:241542703:SNP	rs5030952	19782	-0.35144	0.0164067	8.6e-102	25689	T	C	0.0826	0.0212	TRUE	32	------------------?----??-?---------	0	30.9335	0.4696	0	-0.35144	0.0164067	8.6e-102	0.0164067	8.6e-102	547	FALSE	1
	cg14927745-chr2:241603305:SNP	cg14927745				Island	chr2	241562485	chr2:241603305:SNP	rs77881215	40820	-0.224669	0.0107154	1.32e-97	24748	A	T	0.2221	0.0117	TRUE	31	-------?----------?-----?-??--------	13.3	34.6157	0.2569	0.000556	-0.224525	0.0118041	1.15e-80	0.0123641	8.73e-74	547	FALSE	1
	cg14927745-chr2:241581522:SNP	cg14927745				Island	chr2	241562485	chr2:241581522:SNP	rs62186554	19037	-0.22172	0.0093438	1.81e-124	23281	T	C	0.3996	0.0234	TRUE	30	-------?-?--------?-----?-??--------	64	80.454	9.939e-07	0.0047269	-0.219975	0.0164599	9.78e-41	0.0259223	1.2e-17	547	FALSE	1
	cg14927745-chr2:241414797:SNP	cg14927745				Island	chr2	241562485	chr2:241414797:SNP	rs149376229	147688	-0.0924928	0.0143866	1.28e-10	25200	T	G	0.1107	0.0135	TRUE	32	----+--?+-+-------------?-??----+--+	0	29.5581	0.5402	0	-0.0924928	0.0143866	1.28e-10	0.0143866	1.28e-10	547	FALSE	1
	cg14927745-chr2:241628022:SNP	cg14927745				Island	chr2	241562485	chr2:241628022:SNP	rs145746752	65537	0.347355	0.0227379	1.1e-52	22713	A	G	0.0445	0.0073	TRUE	27	+++?+??+++++++++-+?++?+??+??++++++++	26.7	35.4933	0.1014	0.0052139	0.351529	0.0280791	5.86e-36	0.0310401	4.54e-29	547	FALSE	1
	cg14927745-chr2:241422028:SNP	cg14927745				Island	chr2	241562485	chr2:241422028:SNP	rs7340397	140457	-0.125418	0.0115449	1.72e-27	25974	C	A	0.1742	0.0153	TRUE	33	++++++++++++++++++++++++?+??++++++++	0	30.7474	0.5299	0	-0.125418	0.0115449	1.72e-27	0.0115449	1.72e-27	547	FALSE	1
	cg14927745-chr2:241581298:INDEL	cg14927745				Island	chr2	241562485	chr2:241581298:INDEL	chr2.241581298	18813	0.313113	0.0125415	1.42e-137	14009	I	D	0.3249	0.0286	TRUE	20	?--??--???--?--?----???-?-?-?--??---	26.3	25.7674	0.1368	0.0011391	0.313024	0.0151055	2.17e-95	0.0170085	1.11e-75	547	FALSE	1
	cg14927745-chr2:241541129:SNP	cg14927745				Island	chr2	241562485	chr2:241541129:SNP	rs73003705	21356	0.299654	0.0185306	8.11e-59	25045	T	A	0.0634	0.0098	TRUE	32	------?-+--------------?--?--?------	57.6	73.1114	2.953e-05	0.0152472	0.31907	0.0306215	2.01e-25	0.0437032	7.05e-12	547	FALSE	1
	cg14927745-chr2:241633588:SNP	cg14927745				Island	chr2	241562485	chr2:241633588:SNP	chr2.241633588	71103	0.369343	0.0291423	8.27e-37	13695	A	G	0.044	0.0055	TRUE	16	?++???????++?++?-+?+??+??+???++??+++	45.1	27.3395	0.02609	0.0117618	0.387877	0.0436554	6.39e-19	0.0531158	3.56e-12	547	FALSE	1
	cg14927745-chr2:241539478:SNP	cg14927745				Island	chr2	241562485	chr2:241539478:SNP	rs57337179	23007	0.141283	0.0112864	5.95e-36	27117	T	C	0.175	0.0136	TRUE	35	+-+++++++++++++++++++++--+?++++++++-	65.6	98.8231	3.06e-08	0.008627	0.146192	0.0203415	6.63e-13	0.0328046	1.66e-05	547	FALSE	1
	cg14927745-chr2:241600127:INDEL	cg14927745				Island	chr2	241562485	chr2:241600127:INDEL	chr2.241600127	37642	-0.206309	0.0136028	5.88e-52	14275	D	I	0.2571	0.0283	TRUE	17	?--??-????--?--?--?-??-??-???--??---	33.4	24.0266	0.08893	0.0016283	-0.209972	0.0176573	1.31e-32	0.0204268	5.53e-24	547	FALSE	1
	cg14927745-chr2:241433871:SNP	cg14927745				Island	chr2	241562485	chr2:241433871:SNP	rs11682315	128614	-0.133389	0.0096924	4.31e-43	23347	C	A	0.3462	0.0227	TRUE	30	+++++++?-?+++++++++++?++?+??++++++++	0	27.9274	0.5218	0	-0.133389	0.0096924	4.31e-43	0.0096924	4.31e-43	547	FALSE	1
	cg14927745-chr2:241623502:SNP	cg14927745				Island	chr2	241562485	chr2:241623502:SNP	rs114006346	61017	0.352004	0.0222436	2.09e-56	23224	C	T	0.0461	0.0078	TRUE	28	---?-??----+----+-?--?--?-??--------	21.5	34.3782	0.1553	0.003869	0.355119	0.0263026	1.54e-41	0.028322	1.83e-35	547	FALSE	1
	cg14927745-chr2:241627646:INDEL	cg14927745				Island	chr2	241562485	chr2:241627646:INDEL	chr2.241627646	65161	0.336432	0.024087	2.46e-44	19794	D	I	0.0453	0.0062	TRUE	24	+++?+???+?++++++-+?++?+??+??+++?++++	30.6	33.1316	0.0788	0.0063125	0.339314	0.030953	5.8e-28	0.0346973	3.13e-22	547	FALSE	1
	cg14927745-chr2:241593747:SNP	cg14927745				Island	chr2	241562485	chr2:241593747:SNP	rs143708223	31262	0.356051	0.0205473	2.88e-67	25955	A	G	0.048	0.0079	TRUE	33	++++++++++++++++-+++++++?+??++++++++	31.1	46.4456	0.04751	0.0064087	0.363028	0.0262475	1.66e-43	0.0298229	7.43e-33	547	FALSE	1
	cg14927745-chr2:241472460:SNP	cg14927745				Island	chr2	241562485	chr2:241472460:SNP	rs4605371	90025	0.182637	0.0123932	3.74e-49	24564	C	T	0.1598	0.0159	TRUE	32	------------------?-------??--?-----	31.7	45.3678	0.04621	0.0023118	0.176251	0.0157121	3.34e-29	0.0181372	7.52e-24	547	FALSE	1
	cg14927745-chr2:241597269:SNP	cg14927745				Island	chr2	241562485	chr2:241597269:SNP	rs62187771	34784	-0.226592	0.0107165	3.13e-99	24730	G	T	0.2224	0.0115	TRUE	31	+++++++?++++++++++?+++++?+??++++++++	12.7	34.381	0.2659	0.0005278	-0.226213	0.0117548	1.57e-82	0.0122815	5.24e-76	547	FALSE	1
	cg14927745-chr2:241581438:SNP	cg14927745				Island	chr2	241562485	chr2:241581438:SNP	rs35523523	18953	-0.13986	0.010284	4.01e-42	23710	A	T	0.2774	0.0251	TRUE	31	-------?-?-----+--------?-??--------	0	22.7752	0.8244	0	-0.13986	0.010284	4.01e-42	0.010284	4.01e-42	547	FALSE	1
	cg14927745-chr2:241648293:SNP	cg14927745				Island	chr2	241562485	chr2:241648293:SNP	rs78226938	85808	-0.278565	0.0207295	3.62e-41	13278	A	G	0.1028	0.0294	TRUE	17	---?-?????--?-??--????-??-??--?--?--	0	7.93523	0.9508	0	-0.278565	0.0207295	3.62e-41	0.0207295	3.62e-41	547	FALSE	1
	cg14927745-chr2:241451855:SNP	cg14927745				Island	chr2	241562485	chr2:241451855:SNP	rs79667746	110630	-0.238867	0.0218067	6.37e-28	25473	A	G	0.0447	0.0072	TRUE	32	---+--------------+----??-??---+----	22	39.7516	0.1347	0.0043594	-0.232711	0.0256283	1.08e-19	0.027963	1.32e-17	547	FALSE	1
	cg14927745-chr2:241570249:SNP	cg14927745				Island	chr2	241562485	chr2:241570249:SNP	rs3749172	7764	0.266201	0.0085707	8.47e-212	26649	A	C	0.4236	0.0251	TRUE	34	++++++++++++++++++++++++?+?+++++++++	50.7	66.9891	0.0004246	0.0026089	0.265286	0.0128808	3.02e-94	0.0173982	7.59e-53	547	FALSE	1
	cg14927745-chr2:241674222:SNP	cg14927745				Island	chr2	241562485	chr2:241674222:SNP	rs3755533	111737	-0.16316	0.0176375	2.23e-20	8713	T	C	0.236	0.0252	TRUE	13	-??--?-?-??--??+????--??????-??--???	0	11.5859	0.4795	0	-0.16316	0.0176375	2.23e-20	0.0176375	2.23e-20	547	FALSE	1
	cg14927745-chr2:241554018:SNP	cg14927745				Island	chr2	241562485	chr2:241554018:SNP	rs56086919	8467	0.300273	0.0182886	0	25731	T	C	0.0631	0.0096	TRUE	33	++++++?+-+++++++++++++++?+?+++++++++	55.7	72.2397	6.075e-05	0.0141509	0.316821	0.0294146	4.72e-27	0.0412863	3.52e-13	547	FALSE	1
	cg14927745-chr2:241556826:SNP	cg14927745				Island	chr2	241562485	chr2:241556826:SNP	rs17846976	5659	0.287007	0.0189638	9.6e-52	23529	C	A	0.0639	0.0093	TRUE	31	------??+?--------------?-?---------	50.2	60.2724	0.0008533	0.0114997	0.300586	0.028881	2.29e-25	0.0380998	4.96e-14	547	FALSE	1
	cg14927745-chr2:241613258:SNP	cg14927745				Island	chr2	241562485	chr2:241613258:SNP	rs10209921	50773	-0.143152	0.0107512	1.9e-40	20134	G	A	0.3089	0.0235	TRUE	25	+++?-++?+?++?+++++?+??++?+??+++?++++	0.9	24.2211	0.449	2.72e-05	-0.143049	0.0108283	7.62e-40	0.0108503	9.58e-40	547	FALSE	1
	cg14927745-chr2:241627172:SNP	cg14927745				Island	chr2	241562485	chr2:241627172:SNP	rs78189951	64687	0.345813	0.0227504	3.52e-52	22714	T	C	0.0448	0.0074	TRUE	27	+++?+??+++++++++-+?++?+??+??++++++++	28.1	36.1725	0.08854	0.0055944	0.349467	0.0284311	1e-34	0.0316515	8.69e-28	547	FALSE	1
	cg14927745-chr2:241614598:SNP	cg14927745				Island	chr2	241562485	chr2:241614598:SNP	chr2.241614598	52113	0.358637	0.0270194	3.31e-40	15068	C	T	0.0476	0.008	TRUE	18	?--???-???--?--?+-?-??--?-???--??---	42.7	29.6723	0.02881	0.0102281	0.3669	0.0390832	6.13e-21	0.0471604	2.86e-14	547	FALSE	1
	cg14927745-chr2:241473653:SNP	cg14927745				Island	chr2	241562485	chr2:241473653:SNP	rs13007762	88832	0.181804	0.0123901	9.56e-49	24562	G	A	0.1599	0.016	TRUE	32	------------------?-------??--?-----	31.2	45.0874	0.04896	0.0022656	0.175352	0.0156555	4.05e-29	0.0180206	6.2e-24	547	FALSE	1
	cg14927745-chr2:241471592:INDEL	cg14927745				Island	chr2	241562485	chr2:241471592:INDEL	chr2.241471592	90893	-0.173638	0.012401	1.52e-44	23817	D	I	0.1642	0.0244	TRUE	31	---?---?-?-+----+-------?------?----	15.4	35.4691	0.226	0.0008833	-0.172922	0.0138922	1.45e-35	0.0146617	2.34e-32	547	FALSE	1
	cg14927745-chr2:241601177:SNP	cg14927745				Island	chr2	241562485	chr2:241601177:SNP	rs79012890	38692	-0.224892	0.0105615	1.3e-100	25485	T	G	0.2221	0.0116	TRUE	32	------------------?-----?-??--------	12.2	35.3105	0.2717	0.0005035	-0.224703	0.011532	1.47e-84	0.0120301	5.53e-78	547	FALSE	1
	cg14927745-chr2:241511119:SNP	cg14927745				Island	chr2	241562485	chr2:241511119:SNP	rs4676424	51366	-0.150078	0.0123902	9.06e-34	13325	T	G	0.4606	0.0447	TRUE	21	------??-?--?-?---?-?????-??--?--?--	38.6	32.5664	0.03762	0.0020638	-0.148661	0.0165513	2.66e-19	0.0201753	1.02e-13	547	FALSE	1
	cg14927745-chr2:241613372:SNP	cg14927745				Island	chr2	241562485	chr2:241613372:SNP	rs12619944	50887	0.169437	0.0097413	9.22e-68	21032	A	G	0.4621	0.0294	TRUE	26	+++?+++?+?+++++-++?+??++?+??+++?++++	39	40.9539	0.02322	0.0016074	0.166242	0.0132	2.28e-36	0.0159578	2.46e-26	547	FALSE	1
	cg14927745-chr2:241612325:SNP	cg14927745				Island	chr2	241562485	chr2:241612325:SNP	rs111845626	49840	-0.147534	0.0101417	6.08e-48	22217	G	T	0.3179	0.0168	TRUE	28	+++++++?+?++++++++?+??++?+??++++++++	0	24.0271	0.6288	0	-0.147534	0.0101417	6.08e-48	0.0101417	6.08e-48	547	FALSE	1
	cg14927745-chr2:241570127:SNP	cg14927745				Island	chr2	241562485	chr2:241570127:SNP	rs12468485	7642	0.264705	0.0159278	0	25972	T	C	0.0817	0.0104	TRUE	33	++-+++++++++++++++++-+++?+??++++++++	75.3	129.735	1.009e-13	0.0259731	0.262127	0.0338938	1.04e-14	0.064575	4.15e-05	547	FALSE	1
	cg14927745-chr2:241536819:SNP	cg14927745				Island	chr2	241562485	chr2:241536819:SNP	rs3828345	25666	0.142192	0.011275	1.83e-36	27140	A	C	0.1753	0.0134	TRUE	35	+-+++++++++++++++++++++--+?++++++++-	65.4	98.2389	3.737e-08	0.0085322	0.146426	0.0202649	4.99e-13	0.0325778	1.27e-05	547	FALSE	1
	cg14927745-chr2:241567812:SNP	cg14927745				Island	chr2	241562485	chr2:241567812:SNP	rs2975783	5327	0.455536	0.0098148	0	26209	C	T	0.2425	0.038	TRUE	33	------------------?-----?-?---------	67	97.0277	1.809e-08	0.0065637	0.45561	0.0180577	1.84e-140	0.0297597	6.85e-53	547	FALSE	1
	cg14927745-chr2:241672740:SNP	cg14927745				Island	chr2	241562485	chr2:241672740:SNP	rs3772050	110255	-0.161207	0.0105558	1.18e-52	23284	T	C	0.2586	0.0441	TRUE	32	---------------+--?---?---??--------	5.8	32.9199	0.3732	0.0002232	-0.161226	0.0109802	8.23e-49	0.0112096	6.79e-47	547	FALSE	1
	cg14927745-chr2:241593944:SNP	cg14927745				Island	chr2	241562485	chr2:241593944:SNP	rs2060188	31459	0.174258	0.0084532	2.04e-94	27749	T	G	0.4461	0.0228	TRUE	36	+++++++++++++++++++++++++-++++++++-+	55.2	78.1443	3.894e-05	0.0032138	0.175445	0.0133154	1.21e-39	0.0188735	2.63e-20	547	FALSE	1
	cg14927745-chr2:241565055:SNP	cg14927745				Island	chr2	241562485	chr2:241565055:SNP	rs12986443	2570	0.470116	0.0129718	0.0000000000000000000000000000000000000000000000000000000000000000000000000000000000000000000000000000000000000000000000000000000000000000000000000000000000000000000000000000000000000000000000000000000000000000000000000000000000000000000000000000000000000000000000000000000000000000000000136	13621	T	C	0.2766	0.0294	TRUE	19	?++??++???++?++?++?+???+?+???+++?+++	63.8	49.6969	8.387e-05	0.00573	0.465543	0.0227659	6.12e-93	0.0358143	2.32e-39	547	FALSE	1
	cg14927745-chr2:241591049:SNP	cg14927745				Island	chr2	241562485	chr2:241591049:SNP	rs62187762	28564	-0.250224	0.0111116	2.69e-112	23290	C	T	0.2177	0.0123	TRUE	30	+++++++?+?++++++++?+++++?+??++++++++	21.7	37.0217	0.1457	0.0010412	-0.248664	0.0130212	2.68e-81	0.0141852	1.22e-69	547	FALSE	1
	cg14927745-chr2:241598155:SNP	cg14927745				Island	chr2	241562485	chr2:241598155:SNP	rs62187772	35670	-0.226929	0.0107164	1.6e-99	24730	T	C	0.2222	0.0114	TRUE	31	-------?----------?-----?-??--------	10.4	33.4919	0.3016	0.0004207	-0.226663	0.0115589	1.29e-85	0.0119638	3.14e-80	547	FALSE	1
	cg14927745-chr2:241653287:SNP	cg14927745				Island	chr2	241562485	chr2:241653287:SNP	rs4613	90802	0.177735	0.0098654	1.46e-72	22007	G	A	0.3536	0.0206	TRUE	30	------?--------------??-?-??------+-	40.8	48.9483	0.01169	0.0020297	0.179107	0.013336	4.02e-41	0.0166515	1.35e-26	547	FALSE	1
	cg14927745-chr2:241591644:SNP	cg14927745				Island	chr2	241562485	chr2:241591644:SNP	rs6437356	29159	0.391427	0.0094236	0	27748	G	A	0.2576	0.0356	TRUE	36	------------------------------------	56.9	81.2787	1.517e-05	0.0042861	0.394218	0.0151442	2.21e-149	0.021884	1.5e-71	547	FALSE	1
	cg14927745-chr2:241581311:SNP	cg14927745				Island	chr2	241562485	chr2:241581311:SNP	rs62186553	18826	0.312931	0.0124555	2.73e-139	14008	A	G	0.3353	0.0381	TRUE	20	?++??++???++?++?++++???+?+?+?++??+++	26.3	25.7819	0.1364	0.0011258	0.312873	0.0150076	1.6e-96	0.0169014	1.56e-76	547	FALSE	1
	cg14927745-chr2:241577705:SNP	cg14927745				Island	chr2	241562485	chr2:241577705:SNP	rs12468223	15220	0.438736	0.0194517	1.2e-112	25188	A	G	0.055	0.0099	TRUE	32	+++++++?++++++++++++++++?+??++++++++	55.9	70.3133	6.953e-05	0.0156356	0.434097	0.0314009	1.82e-43	0.0441198	2.67e-23	547	FALSE	1
	cg14927745-chr2:241607552:INDEL	cg14927745				Island	chr2	241562485	chr2:241607552:INDEL	chr2.241607552	45067	-0.314955	0.0279379	1.78e-29	8942	D	I	0.0823	0.0133	TRUE	12	?--???????--?-??--????-??-???-????--	40.5	18.4905	0.07088	0.0069718	-0.323907	0.0402067	7.88e-16	0.0469622	1.99e-11	547	FALSE	1
	cg14927745-chr2:241463453:SNP	cg14927745				Island	chr2	241562485	chr2:241463453:SNP	rs3821348	99032	-0.18771	0.0113647	2.77e-61	27257	A	C	0.1751	0.0377	TRUE	35	----------------+-------?-----------	2.6	34.9075	0.4247	0.0001223	-0.187586	0.0115831	5.48e-59	0.011668	3.12e-58	547	FALSE	1
	cg14927745-chr2:241622816:INDEL	cg14927745				Island	chr2	241562485	chr2:241622816:INDEL	chr2.241622816	60331	0.287716	0.0121407	0	16351	D	I	0.2769	0.0248	TRUE	22	+++??+????++++++++?+???+?+??+++?++-+	75.2	84.5163	1.401e-09	0.0099871	0.28609	0.0256935	8.5e-29	0.0488613	3.9e-09	547	FALSE	1
	cg14927745-chr2:241457180:SNP	cg14927745				Island	chr2	241562485	chr2:241457180:SNP	rs4423589	105305	0.129201	0.0132857	0	20343	A	G	0.1657	0.0201	TRUE	27	+++++++?+?++++++-+?++?++?+??++?++?+-	26	35.1255	0.109	0.001714	0.12693	0.0162458	5.58e-15	0.0179488	6.1e-13	547	FALSE	1
	cg14927745-chr2:241457604:SNP	cg14927745				Island	chr2	241562485	chr2:241457604:SNP	rs79594281	104881	0.221909	0.0201078	2.56e-28	20804	A	C	0.0613	0.0106	TRUE	26	++++++??-++++-++?+?++?++?+??++?++?-+	63.2	68.0164	7.55e-06	0.0184265	0.22471	0.0350127	1.38e-10	0.0547063	4.98e-05	547	FALSE	1
	cg14927745-chr2:241518998:SNP	cg14927745				Island	chr2	241562485	chr2:241518998:SNP	rs72999942	43487	0.296738	0.0178339	3.64e-62	27129	G	A	0.0632	0.0094	TRUE	35	--------------------------?---------	52.4	71.4829	0.000178	0.012492	0.313876	0.0276235	6.42e-30	0.0374947	2.49e-15	547	FALSE	1
	cg14927745-chr2:241497591:SNP	cg14927745				Island	chr2	241562485	chr2:241497591:SNP	rs13005068	64894	0.182467	0.0132032	1.93e-43	21817	A	C	0.1598	0.017	TRUE	29	+++++++?+?++++++++?++-++?+??++?+++++	30.2	40.1293	0.06439	0.002226	0.177643	0.0165573	7.44e-27	0.0189227	5.27e-22	547	FALSE	1
	cg14927745-chr2:241567962:SNP	cg14927745				Island	chr2	241562485	chr2:241567962:SNP	rs2953154	5477	0.455245	0.0098131	0	26208	C	G	0.2426	0.038	TRUE	33	++++++++++++++++++?+++++?+?+++++++++	67.1	97.2212	1.691e-08	0.0065811	0.455372	0.0180731	4.41e-140	0.0298137	1.22e-52	547	FALSE	1
	cg14927745-chr2:241606872:SNP	cg14927745				Island	chr2	241562485	chr2:241606872:SNP	rs77549099	44387	0.358438	0.0207691	9.71e-67	25961	G	A	0.0474	0.0083	TRUE	33	----------------+-------?-??--------	26.9	43.8003	0.07985	0.0053506	0.364878	0.0256698	7.47e-46	0.0284279	1.89e-36	547	FALSE	1
	cg14927745-chr2:241524208:SNP	cg14927745				Island	chr2	241562485	chr2:241524208:SNP	rs7604368	38277	0.298129	0.0177821	4.35e-63	27131	C	T	0.0636	0.0095	TRUE	35	--------------------------?---------	52.9	72.1405	0.0001474	0.0126373	0.314133	0.0276777	7.44e-30	0.0377298	2.75e-15	547	FALSE	1
	cg14927745-chr2:241582151:SNP	cg14927745				Island	chr2	241562485	chr2:241582151:SNP	rs12622957	19666	0.359923	0.00944	0.00000000000000000000000000000000000000000000000000000000000000000000000000000000000000000000000000000000000000000000000000000000000000000000000000000000000000000000000000000000000000000000000000000000000000000000000000000000000000000000000000000000000000000000000000000000000000000000000000000000000000000000000000000448999942021483	24387	A	C	0.3215	0.0366	TRUE	32	+++++++?+?++++++++++++++?+?+++++++++	55.5	69.6455	8.505e-05	0.0036162	0.360252	0.0150085	2.57e-127	0.0212081	1.35e-64	547	FALSE	1
	cg14927745-chr2:241581312:INDEL	cg14927745				Island	chr2	241562485	chr2:241581312:INDEL	chr2.241581312	18827	0.312922	0.0124532	2.47e-139	14010	I	D	0.3354	0.0381	TRUE	20	?--??--???--?--?----???-?-?-?--??---	26.3	25.7698	0.1367	0.0011234	0.312856	0.0150007	1.34e-96	0.0168904	1.26e-76	547	FALSE	1
	cg14927745-chr2:241595898:SNP	cg14927745				Island	chr2	241562485	chr2:241595898:SNP	rs6760169	33413	0.172337	0.0084578	2.72e-92	27694	T	G	0.4465	0.0229	TRUE	36	+++++++++++++++++++++++++-++++++++-+	56.3	80.0507	2.201e-05	0.0033592	0.173687	0.01348	5.48e-38	0.0193443	5.15e-19	547	FALSE	1
	cg14927745-chr2:241434584:SNP	cg14927745				Island	chr2	241562485	chr2:241434584:SNP	rs113587121	127901	-0.238593	0.0215456	1.68e-28	25984	T	C	0.0447	0.007	TRUE	33	---+----+---------+-----?-??---+----	19.1	39.5752	0.1678	0.0036792	-0.232559	0.0247907	6.54e-21	0.026646	3.42e-19	547	FALSE	1
	cg14927745-chr2:241389219:SNP	cg14927745				Island	chr2	241562485	chr2:241389219:SNP	rs13421123	173266	0.166047	0.0148251	4.06e-29	18095	A	G	0.1515	0.0255	TRUE	27	++++++??+?++?+++++++++?+?+??+++++?++	18.2	31.7665	0.201	0.001335	0.168422	0.0168452	1.55e-23	0.0181132	4.85e-20	547	FALSE	1
	cg14927745-chr2:241596636:SNP	cg14927745				Island	chr2	241562485	chr2:241596636:SNP	rs74512877	34151	0.360204	0.0206937	7.37e-68	25963	T	G	0.0476	0.0083	TRUE	33	++++++++++++++++-+++++++?+??++++++++	28.8	44.9228	0.06437	0.0058163	0.366655	0.0259494	2.5e-45	0.0290506	2.64e-35	547	FALSE	1
	cg14927745-chr2:241569329:SNP	cg14927745				Island	chr2	241562485	chr2:241569329:SNP	rs2975785	6844	0.232416	0.0085514	1.16e-162	26649	A	G	0.4504	0.0218	TRUE	34	++++++++++++++++++++++++?+?+++++++++	47.8	63.2489	0.001182	0.0023121	0.231345	0.0124906	1.39e-76	0.0163899	1.21e-45	547	FALSE	1
	cg14927745-chr2:241579218:SNP	cg14927745				Island	chr2	241562485	chr2:241579218:SNP	rs4676404	16733	0.279013	0.009027	9.1e-210	23721	T	C	0.4894	0.0264	TRUE	31	+++++++?+?++++++++++++++?+??++++++++	66.5	89.607	7.532e-08	0.0051042	0.278725	0.0164876	4.12e-64	0.0269627	4.27e-25	547	FALSE	1
	cg14927745-chr2:241516094:SNP	cg14927745				Island	chr2	241562485	chr2:241516094:SNP	rs34344571	46391	0.295457	0.0178378	1.28e-61	27122	C	G	0.0631	0.0094	TRUE	35	++++++++++++++++++++++++++?+++++++++	51.6	70.2717	0.0002512	0.0120929	0.312383	0.0273845	3.85e-30	0.0368675	1.11e-15	547	FALSE	1
	cg14927745-chr2:241452807:SNP	cg14927745				Island	chr2	241562485	chr2:241452807:SNP	rs113970725	109678	-0.24129	0.0214632	2.54e-29	26139	T	C	0.0452	0.0078	TRUE	33	---+--------------+----??-?----+----	18.9	39.4731	0.1706	0.0035988	-0.236685	0.0246145	6.87e-22	0.0264756	7.96e-20	547	FALSE	1
	cg14927745-chr2:241443201:SNP	cg14927745				Island	chr2	241562485	chr2:241443201:SNP	rs111648864	119284	-0.242681	0.0217542	6.73e-29	25474	G	A	0.0448	0.0071	TRUE	32	+++-++++++++++++++-++++??+??+++-++++	21.2	39.3516	0.1443	0.0041403	-0.236632	0.0254182	1.28e-20	0.0276149	1.52e-18	547	FALSE	1
	cg14927745-chr2:241493998:SNP	cg14927745				Island	chr2	241562485	chr2:241493998:SNP	rs4494742	68487	0.524112	0.0294003	0	14858	T	C	0.0436	0.0102	TRUE	22	+++++??+++++++?+++?+???+?+??+??+??++	0	18.7624	0.6004	0	0.524112	0.0294003	4.38e-71	0.0294003	4.38e-71	547	FALSE	1
	cg14927745-chr2:241441141:SNP	cg14927745				Island	chr2	241562485	chr2:241441141:SNP	rs78152510	121344	-0.100212	0.0138104	3.98e-13	26452	A	G	0.115	0.0153	TRUE	34	----+--+-----+------------??----+--+	0	27.0745	0.7564	0	-0.100212	0.0138104	3.98e-13	0.0138104	3.98e-13	547	FALSE	1
	cg14927745-chr2:241561088:SNP	cg14927745				Island	chr2	241562485	chr2:241561088:SNP	rs4676411	1397	0.2938	0.0146663	2.88e-89	9590	T	G	0.3717	0.0211	TRUE	15	?++?+??+++++???+++???????+?????+??++	77.2	61.3992	6.658e-08	0.0112225	0.291213	0.0325037	3.27e-19	0.0643213	4.93e-06	547	FALSE	1
	cg14927745-chr2:241608697:SNP	cg14927745				Island	chr2	241562485	chr2:241608697:SNP	rs62187779	46212	-0.224515	0.0107346	3.9e-97	24736	G	T	0.2211	0.0123	TRUE	31	+++++++?++++++++++?+++++?+??++++++++	12.9	34.4362	0.2637	0.0005363	-0.224438	0.0117854	7.41e-81	0.012322	3.54e-74	547	FALSE	1
	cg14927745-chr2:241622126:SNP	cg14927745				Island	chr2	241562485	chr2:241622126:SNP	rs192451353	59641	0.353664	0.0229714	1.75e-53	22473	A	G	0.0448	0.008	TRUE	27	+++?+???++++++++-+?++?++?+??++++++++	13.4	30.0328	0.2663	0.0022633	0.356433	0.0255602	3.38e-44	0.0265344	1.58e-40	547	FALSE	1
	cg14927745-chr2:241454199:SNP	cg14927745				Island	chr2	241562485	chr2:241454199:SNP	rs4676434	108286	-0.10593	0.0144583	2.36e-13	23723	T	C	0.1173	0.0152	TRUE	31	----+--?-?+--+----------?-??----+--+	4.8	31.527	0.3898	0.0003358	-0.104779	0.0150038	2.88e-12	0.0151942	3.13e-12	547	FALSE	1
	cg14927745-chr2:241593998:SNP	cg14927745				Island	chr2	241562485	chr2:241593998:SNP	rs2060189	31513	0.173682	0.0084508	7.36e-94	27747	T	A	0.4463	0.0229	TRUE	36	-------------------------+--------+-	55.3	78.2609	3.762e-05	0.0032207	0.174918	0.0133221	2.22e-39	0.0188962	3.88e-20	547	FALSE	1
	cg14927745-chr2:241605386:SNP	cg14927745				Island	chr2	241562485	chr2:241605386:SNP	rs75379504	42901	0.356415	0.020767	5.06e-66	25961	T	C	0.0475	0.0083	TRUE	33	++++++++++++++++-+++++++?+??++++++++	27.2	43.9398	0.07778	0.005413	0.362218	0.0257173	4.72e-45	0.0285155	7.56e-36	547	FALSE	1
	cg14927745-chr2:241444449:SNP	cg14927745				Island	chr2	241562485	chr2:241444449:SNP	rs55769870	118036	-0.242681	0.0217542	6.73e-29	25474	A	T	0.0448	0.0071	TRUE	32	---+--------------+----??-??---+----	21.2	39.3516	0.1443	0.0041403	-0.236632	0.0254182	1.28e-20	0.0276149	1.52e-18	547	FALSE	1
	cg14927745-chr2:241586810:SNP	cg14927745				Island	chr2	241562485	chr2:241586810:SNP	rs6724516	24325	0.378962	0.009431	0	27746	G	A	0.26	0.0362	TRUE	36	------------------------------------	57.5	82.3178	1.104e-05	0.0043907	0.383821	0.0152609	1.39e-139	0.0221812	1.92e-65	547	FALSE	1
	cg14927745-chr2:241579169:SNP	cg14927745				Island	chr2	241562485	chr2:241579169:SNP	rs4676405	16684	0.391739	0.0099744	0	24998	T	C	0.2549	0.0379	TRUE	33	+++++++?+?++++++++++++++?+++++++++++	59.7	79.3622	6.695e-06	0.0049396	0.393599	0.0166112	4.08e-124	0.0247372	1.76e-56	547	FALSE	1
	cg14927745-chr2:241623468:SNP	cg14927745				Island	chr2	241562485	chr2:241623468:SNP	rs79845143	60983	-0.244219	0.0117027	1.03e-96	21346	G	C	0.2184	0.0272	TRUE	27	++++++??+?++++++++?++?++?+??+++?++++	36.6	40.9899	0.03111	0.0021736	-0.242455	0.0155085	4.3e-55	0.0184497	5.36e-40	547	FALSE	1
	cg14927745-chr2:241652703:SNP	cg14927745				Island	chr2	241562485	chr2:241652703:SNP	rs755300	90218	0.205189	0.0100665	2.35e-92	20863	C	T	0.3598	0.0219	TRUE	30	------?--?------------?-?-??------+-	13.6	33.5469	0.2562	0.0004819	0.2051	0.0110361	4.29e-77	0.0116449	1.71e-69	547	FALSE	1
	cg14927745-chr2:241647804:INDEL	cg14927745				Island	chr2	241562485	chr2:241647804:INDEL	chr2.241647804	85319	-0.166071	0.014238	1.95e-31	11467	D	I	0.3046	0.0296	TRUE	12	?--??-????-??--?--?-??-??-???????-??	29.8	15.6612	0.1542	0.0010737	-0.162861	0.0178248	6.43e-20	0.0202714	2.56e-16	547	FALSE	1
	cg14927745-chr2:241589450:INDEL	cg14927745				Island	chr2	241562485	chr2:241589450:INDEL	chr2.241589450	26965	-0.20628	0.0144621	3.7e-46	15190	I	D	0.198	0.0185	TRUE	19	?++??+????++?++?++++??++?+?+??+??+++	36.7	28.4323	0.05577	0.0023666	-0.209096	0.0192437	1.68e-27	0.022844	1.72e-19	547	FALSE	1
	cg14927745-chr2:241437708:SNP	cg14927745				Island	chr2	241562485	chr2:241437708:SNP	rs188820172	124777	-0.24704	0.0217191	5.61e-30	25245	T	G	0.0453	0.007	TRUE	32	---+----+---------+-----?-??---?----	10.3	34.5636	0.3014	0.0017613	-0.24412	0.0234206	1.94e-25	0.0242158	1.95e-24	547	FALSE	1
	cg14927745-chr2:241601712:INDEL	cg14927745				Island	chr2	241562485	chr2:241601712:INDEL	chr2.241601712	39227	-0.22004	0.0112189	1.19e-85	22109	I	D	0.2302	0.013	TRUE	28	+++?+++?+?++++++++?+++++?+??+++?++++	9.1	29.7016	0.3277	0.0003591	-0.219485	0.0120022	1.05e-74	0.0123415	4.19e-71	547	FALSE	1
	cg14927745-chr2:241621412:SNP	cg14927745				Island	chr2	241562485	chr2:241621412:SNP	rs73117918	58927	0.214858	0.0178364	2.03e-33	6258	G	A	0.4754	0.0289	TRUE	11	-??????????-?-?---???????-??-???-?+-	65.6	29.1083	0.001197	0.0072083	0.203348	0.0338443	1.87e-09	0.0519185	3.5e-05	547	FALSE	1
	cg14927745-chr2:241622103:SNP	cg14927745				Island	chr2	241562485	chr2:241622103:SNP	rs116505219	59618	0.330365	0.0236547	2.51e-44	21536	C	A	0.0448	0.0078	TRUE	25	---?-?-??-------+-?--?-??-??---?----	6.8	25.7627	0.3653	0.0010561	0.331605	0.025032	4.68e-40	0.0253921	1.07e-38	547	FALSE	1
	cg14927745-chr2:241526862:SNP	cg14927745				Island	chr2	241562485	chr2:241526862:SNP	rs67448739	35623	0.140091	0.0114557	2.18e-34	26253	T	C	0.1751	0.0133	TRUE	34	+-++++?++++++++++++++++-++?++++++++-	64.7	93.3704	1.124e-07	0.0082928	0.144603	0.0204161	1.41e-12	0.0324127	1.55e-05	547	FALSE	1
	cg14927745-chr2:241659368:SNP	cg14927745				Island	chr2	241562485	chr2:241659368:SNP	rs6437368	96883	0.227872	0.0218926	2.27e-25	5817	C	A	0.2368	0.0298	TRUE	9	?--???????--?????-???????-?????-??+-	34.9	12.2914	0.1387	0.0024018	0.223248	0.0284273	4.05e-15	0.0336365	1.25e-11	547	FALSE	1
	cg14927745-chr2:241621866:SNP	cg14927745				Island	chr2	241562485	chr2:241621866:SNP	rs62187796	59381	-0.241762	0.0111607	4.69e-104	22563	T	C	0.2275	0.0248	TRUE	29	-------?-?-----+--?-----?-??---?----	29.5	39.722	0.06999	0.0015382	-0.240456	0.0139117	6.16e-67	0.015833	1.22e-52	547	FALSE	1
	cg14927745-chr2:241425001:INDEL	cg14927745				Island	chr2	241562485	chr2:241425001:INDEL	chr2.241425001	137484	-0.111074	0.0177625	4.02e-10	14540	D	I	0.1293	0.0178	TRUE	18	?--??--???--?+-?--?-??--?-???--???-+	0	16.7237	0.4732	0	-0.111074	0.0177625	4.02e-10	0.0177625	4.02e-10	547	FALSE	1
	cg14927745-chr2:241593031:SNP	cg14927745				Island	chr2	241562485	chr2:241593031:SNP	rs1864867	30546	0.391179	0.0094232	0	27748	T	C	0.2576	0.0357	TRUE	36	++++++++++++++++++++++++++++++++++++	56.9	81.1509	1.577e-05	0.0042741	0.393849	0.0151332	2.55e-149	0.0218486	1.1e-71	547	FALSE	1
	cg14927745-chr2:241642478:SNP	cg14927745				Island	chr2	241562485	chr2:241642478:SNP	rs12695029	79993	-0.15293	0.0089262	8.47e-66	26309	G	A	0.3842	0.0241	TRUE	33	+++++++++++++++-++?++++??+++++++++++	11.4	36.1362	0.2813	0.0003446	-0.152155	0.0096947	1.64e-55	0.01008	5.45e-52	547	FALSE	1
	cg14927745-chr2:241588481:SNP	cg14927745				Island	chr2	241562485	chr2:241588481:SNP	rs12474648	25996	0.358442	0.020537	3.24e-68	25956	A	G	0.0478	0.0077	TRUE	33	++++++++++++++++-+++++++?+??++++++++	32.4	47.3406	0.03951	0.0067971	0.366239	0.0265068	2.02e-43	0.0303823	4.01e-32	547	FALSE	1
	cg14927745-chr2:241578945:SNP	cg14927745				Island	chr2	241562485	chr2:241578945:SNP	rs12474256	16460	0.388679	0.0217716	2.76e-71	25206	G	A	0.0431	0.007	TRUE	32	-------?--------+-------?-??--------	33.2	46.3972	0.03724	0.0076752	0.392204	0.0282858	1.02e-43	0.0325852	8.45e-33	547	FALSE	1
	cg14927745-chr2:241554522:SNP	cg14927745				Island	chr2	241562485	chr2:241554522:SNP	rs73005884	7963	0.28875	0.0185364	1.04e-54	24957	C	A	0.0634	0.0097	TRUE	32	------??+---------------?-?---------	49.2	61.075	0.001006	0.0108862	0.301299	0.0278721	3.09e-27	0.0365197	2.64e-15	547	FALSE	1
	cg14927745-chr2:241484523:INDEL	cg14927745				Island	chr2	241562485	chr2:241484523:INDEL	chr2.241484523	77962	0.201813	0.0162435	1.93e-35	15039	D	I	0.1577	0.0247	TRUE	19	?++??++???++?++?++?+??++?+???+??++++	29.6	25.5501	0.1105	0.0021672	0.197866	0.0204683	4.17e-22	0.0230568	2.08e-18	547	FALSE	1
	cg14927745-chr2:241563289:SNP	cg14927745				Island	chr2	241562485	chr2:241563289:SNP	rs72996930	804	0.273612	0.016759	6.42e-60	23725	T	C	0.08	0.0113	TRUE	31	++-++++?+?++++++++++++++?+??++++++++	76.1	125.54	1.188e-13	0.0282332	0.266211	0.0363089	2.27e-13	0.0701306	9.56e-05	547	FALSE	1
	cg14927745-chr2:241563169:SNP	cg14927745				Island	chr2	241562485	chr2:241563169:SNP	rs2975779	684	-0.321648	0.0109061	3.61e-191	21635	C	T	0.2546	0.0148	TRUE	27	++++++?+++++++++++?+??+??+??++?+++++	17.2	31.3984	0.2138	0.0006795	-0.319704	0.0123842	5.95e-147	0.0131706	1.01e-131	547	FALSE	1
	cg14927745-chr2:241586960:SNP	cg14927745				Island	chr2	241562485	chr2:241586960:SNP	rs6745185	24475	0.391392	0.0094601	0	27740	T	G	0.2541	0.0363	TRUE	36	++++++++++++++++++++++++++++++++++++	57.2	81.7206	1.326e-05	0.0043608	0.393797	0.0152436	3.72e-147	0.0220882	2.97e-70	547	FALSE	1
	cg14927745-chr2:241477667:SNP	cg14927745				Island	chr2	241562485	chr2:241477667:SNP	rs35933147	84818	0.180241	0.0124085	8.34e-48	24547	T	C	0.1593	0.0159	TRUE	32	++++++++++++++++++?+++++++??++?+++++	33.8	46.8545	0.03377	0.002557	0.173074	0.016008	3.03e-27	0.0187546	7.22e-22	547	FALSE	1
	cg14927745-chr2:241588915:SNP	cg14927745				Island	chr2	241562485	chr2:241588915:SNP	rs6732874	26430	0.330012	0.0092596	0.0000000000000000000000000000000000000000000000000000000000000000000000000000000000000000000000000000000000000000000000000000000000000000000000000000000000000000000000000000000000000000000000000000000000000000000000000000000000000000000000000000000000000000000000000000000000000336	27238	G	A	0.2865	0.0302	TRUE	35	------------------------?-----------	55.4	76.2962	4.358e-05	0.0037868	0.330291	0.0146401	1.06e-112	0.0207785	8.4e-57	547	FALSE	1
	cg14927745-chr2:241643000:SNP	cg14927745				Island	chr2	241562485	chr2:241643000:SNP	rs4676381	80515	-0.153498	0.00902	6.09e-65	26311	A	G	0.3676	0.0277	TRUE	33	------------------?----??-----------	14.9	37.6091	0.2278	0.0004771	-0.153082	0.0100405	1.74e-52	0.0106011	1.63e-47	547	FALSE	1
	cg14927745-chr2:241552154:SNP	cg14927745				Island	chr2	241562485	chr2:241552154:SNP	rs73005864	10331	0.300513	0.0181411	1.24e-61	26235	T	C	0.063	0.0096	TRUE	34	++++++?+-+++++++++++++++++?+++++++++	54.4	72.4209	8.912e-05	0.0136259	0.316845	0.0287902	3.6e-28	0.039812	4.41e-14	547	FALSE	1
	cg14927745-chr2:241466210:SNP	cg14927745				Island	chr2	241562485	chr2:241466210:SNP	rs7603521	96275	-0.168061	0.0117741	3.19e-46	26395	T	C	0.1644	0.0234	TRUE	34	------?----+----+-------?-----------	13.1	37.9954	0.2522	0.0007238	-0.167224	0.0129624	4.46e-38	0.0135565	2.71e-35	547	FALSE	1
	cg14927745-chr2:241425845:SNP	cg14927745				Island	chr2	241562485	chr2:241425845:SNP	rs115648258	136640	-0.243619	0.0217248	3.49e-29	25475	G	A	0.0448	0.007	TRUE	32	+++-++++-+++++++++-++++??+??+++-++++	21.4	39.4311	0.1424	0.004168	-0.236946	0.0254045	1.09e-20	0.0276333	1.19e-18	547	FALSE	1
	cg14927745-chr2:241577309:SNP	cg14927745				Island	chr2	241562485	chr2:241577309:SNP	rs78480924	14824	0.429955	0.0193829	5.11e-109	25188	A	G	0.0553	0.0098	TRUE	32	+++++++?++++++++++++++++?+??++++++++	58.2	74.1079	2.166e-05	0.0170257	0.428122	0.0321311	1.67e-40	0.0463364	1.71e-20	547	FALSE	1
	cg14927745-chr2:241609717:SNP	cg14927745				Island	chr2	241562485	chr2:241609717:SNP	rs4676391	47232	-0.158929	0.0087097	2.17e-74	26009	C	T	0.4929	0.0239	TRUE	33	+++++++++++++++-++?+++++++??++++++++	27.9	44.3714	0.07163	0.0009823	-0.158067	0.0107106	2.73e-49	0.0120769	1.5e-39	547	FALSE	1
	cg14927745-chr2:241551177:SNP	cg14927745				Island	chr2	241562485	chr2:241551177:SNP	rs2953159	11308	-0.340562	0.0141756	1.54e-127	25264	G	A	0.1158	0.0319	TRUE	32	++++++++++++++++++++?+++?+??++++++++	7.5	33.5065	0.3467	0.0005285	-0.339252	0.0149953	2.52e-113	0.0153218	1.87e-109	547	FALSE	1
	cg14927745-chr2:241529078:SNP	cg14927745				Island	chr2	241562485	chr2:241529078:SNP	rs56351903	33407	0.295659	0.0183465	1.99e-58	25549	C	G	0.0636	0.0097	TRUE	33	++++++?+++++++++++++++++++?++++?++++	55.5	71.83	6.87e-05	0.0141087	0.313057	0.0295162	2.79e-26	0.0411821	7.01e-13	547	FALSE	1
	cg14927745-chr2:241622885:SNP	cg14927745				Island	chr2	241562485	chr2:241622885:SNP	rs141899114	60400	-0.275065	0.0101411	5.16e-162	21562	G	T	0.3218	0.0226	TRUE	27	++++?+??+?++++++++?++?++?+??++++++++	42	44.7937	0.0124	0.0020454	-0.275429	0.0140736	2.75e-85	0.0174714	7.59e-56	547	FALSE	1
	cg14927745-chr2:241397326:SNP	cg14927745				Island	chr2	241562485	chr2:241397326:SNP	rs13430967	165159	0.144187	0.0132297	1.17e-27	19778	C	G	0.1915	0.0613	TRUE	26	++++++??+?++?++++++++?++?+??+++?+?++	47.9	48.0138	0.003715	0.0042949	0.157846	0.0196542	9.66e-16	0.0254084	1.39e-08	547	FALSE	1
	cg14927745-chr2:241612739:SNP	cg14927745				Island	chr2	241562485	chr2:241612739:SNP	rs142724995	50254	0.357399	0.0214737	3.37e-62	24133	A	G	0.0475	0.0083	TRUE	30	+++++??+++++++++-++++?++?+??++++++++	27.7	40.1241	0.08193	0.0054202	0.365701	0.0267395	1.4e-42	0.0297108	2.49e-33	547	FALSE	1
	cg14927745-chr2:241593471:INDEL	cg14927745				Island	chr2	241562485	chr2:241593471:INDEL	chr2.241593471	30986	-0.208426	0.0114408	3.73e-74	24276	D	I	0.1981	0.0211	TRUE	32	-------?-?--------------?------?----	25.5	41.6287	0.09625	0.0014565	-0.209519	0.0137892	3.85e-52	0.0153635	6.34e-42	547	FALSE	1
	cg14927745-chr2:241586696:SNP	cg14927745				Island	chr2	241562485	chr2:241586696:SNP	rs6735694	24211	0.389941	0.0094578	0	27724	C	T	0.2551	0.0362	TRUE	36	------------------------------------	56.3	80.1711	2.122e-05	0.0042139	0.392475	0.0150939	4.66e-149	0.021664	1.97e-72	547	FALSE	1
	cg14927745-chr2:241540645:SNP	cg14927745				Island	chr2	241562485	chr2:241540645:SNP	rs116625530	21840	-0.448046	0.0345828	2.18e-38	18552	A	G	0.0242	0.0041	TRUE	21	---??????---?--+?-?-??--?-??-----?--	6.7	21.4372	0.3718	0.0018523	-0.447913	0.0363994	8.46e-35	0.037068	1.24e-33	547	FALSE	1
	cg14927745-chr2:241647129:SNP	cg14927745				Island	chr2	241562485	chr2:241647129:SNP	rs1864868	84644	-0.180693	0.0093019	4.72e-84	22901	C	G	0.4612	0.0227	TRUE	30	------??-?-------------??------?----	8.8	31.7873	0.3293	0.0002538	-0.180685	0.0099299	5.54e-74	0.010196	2.84e-70	547	FALSE	1
	cg14927745-chr2:241608453:SNP	cg14927745				Island	chr2	241562485	chr2:241608453:SNP	rs13023028	45968	0.381062	0.0102286	0.000000000000000000000000000000000000000000000000000000000000000000000000000000000000000000000000000000000000000000000000000000000000000000000000000000000000000000000000000000000000000000000000000000000000000000000000000000000000000000000000000000000000000000000000000000000000000000000000000000000000000891	23954	A	G	0.2528	0.0375	TRUE	31	+++++++?+?++++++++?+++++?+?+++++++++	57.3	70.2644	4.474e-05	0.0044303	0.382876	0.0165876	7.01e-118	0.0239568	5.74e-57	547	FALSE	1
	cg14927745-chr2:241570391:SNP	cg14927745				Island	chr2	241562485	chr2:241570391:SNP	rs2975786	7906	0.456017	0.0098315	0	26199	A	G	0.2418	0.0381	TRUE	33	++++++++++++++++++?+++++?+?+++++++++	67.3	97.8311	1.365e-08	0.0066683	0.456192	0.0181661	3.66e-139	0.0300569	5.44e-52	547	FALSE	1
	cg14927745-chr2:241625151:SNP	cg14927745				Island	chr2	241562485	chr2:241625151:SNP	rs147462999	62666	0.353116	0.022725	1.9e-54	22709	A	G	0.045	0.0074	TRUE	27	+++?+??+++++++++-+?++?+??+??++++++++	16.8	31.2389	0.2195	0.002875	0.356098	0.0259356	6.7e-43	0.027304	2.94e-38	547	FALSE	1
	cg14927745-chr2:241607415:SNP	cg14927745				Island	chr2	241562485	chr2:241607415:SNP	rs6437364	44930	-0.159	0.0088519	3.84e-72	25222	A	C	0.4924	0.0244	TRUE	32	-------?-------+--?-------??--------	30	44.3142	0.05729	0.001094	-0.158051	0.0110872	4.16e-46	0.0126536	3.26e-36	547	FALSE	1
	cg14927745-chr2:241424702:SNP	cg14927745				Island	chr2	241562485	chr2:241424702:SNP	rs13003876	137783	0.0953243	0.0096861	0	27131	A	G	0.2719	0.0366	TRUE	35	+++--++++++-+++-++-+++++++?++++-++++	43.7	60.3622	0.003538	0.0025783	0.088218	0.01355	7.49e-11	0.0171964	2.97e-08	547	TRUE	1
	cg14927745-chr2:241644594:SNP	cg14927745				Island	chr2	241562485	chr2:241644594:SNP	rs4436953	82109	0.307283	0.0100796	4.05e-204	22857	T	A	0.2862	0.023	TRUE	30	------??-?--------------?-??------+-	53	61.6959	0.0003782	0.0035007	0.307844	0.0156016	1.16e-86	0.0214438	1.43e-46	547	FALSE	1
	cg14927745-chr2:241622009:SNP	cg14927745				Island	chr2	241562485	chr2:241622009:SNP	rs192736899	59524	0.352037	0.0234374	5.41e-51	21755	G	C	0.0443	0.0077	TRUE	26	---?-???--------+-?--?--?-??---?----	16.5	29.9526	0.2261	0.0029039	0.355044	0.0267751	3.94e-40	0.0280804	4.7e-36	547	FALSE	1
	cg14927745-chr2:241593186:SNP	cg14927745				Island	chr2	241562485	chr2:241593186:SNP	rs12986508	30701	0.17318	0.0084516	2.59e-93	27739	G	C	0.4464	0.0228	TRUE	36	-------------------------+--------+-	55.2	78.0873	3.961e-05	0.0032083	0.174353	0.0133081	3.24e-39	0.018856	4.14e-20	547	FALSE	1
	cg14927745-chr2:241571858:SNP	cg14927745				Island	chr2	241562485	chr2:241571858:SNP	rs2975788	9373	-0.308465	0.0083653	0.00000000000000000000000000000000000000000000000000000000000000000000000000000000000000000000000000000000000000000000000000000000000000000000000000000000000000000000000000000000000000000000000000000000000000000000000000000000000000000000000000000000000000000000000000000000000000000000000000000000118	27228	G	A	0.469	0.0212	TRUE	35	++++++++++++++++++++++++?+++++++++++	36.5	53.5209	0.01781	0.001425	-0.307686	0.0109989	3.34e-172	0.0131681	2.37e-121	547	FALSE	1
	cg14927745-chr2:241475910:SNP	cg14927745				Island	chr2	241562485	chr2:241475910:SNP	rs4676351	86575	0.504248	0.0254646	2.87e-87	17223	G	A	0.0456	0.0077	TRUE	23	-----???--?---?---?--?--?-??-??--?--	0	19.7556	0.5983	0	0.504248	0.0254646	2.87e-87	0.0254646	2.87e-87	547	FALSE	1
	cg14927745-chr2:241550545:INDEL	cg14927745				Island	chr2	241562485	chr2:241550545:INDEL	chr2.241550545	11940	0.294076	0.0197183	2.68e-50	21475	I	D	0.0651	0.0095	TRUE	28	------??+?--------------?-?-?--??---	51.2	55.3682	0.001031	0.0117455	0.31226	0.0305636	1.67e-24	0.0404358	3.53e-13	547	FALSE	1
	cg14927745-chr2:241531479:SNP	cg14927745				Island	chr2	241562485	chr2:241531479:SNP	rs3792269	31006	0.141794	0.0112536	2.12e-36	27141	G	A	0.1759	0.0141	TRUE	35	-+---------------------++-?--------+	64.9	96.9518	5.793e-08	0.0083288	0.145646	0.0200954	4.24e-13	0.03209	9.93e-06	547	FALSE	1
	cg14927745-chr2:241569585:SNP	cg14927745				Island	chr2	241562485	chr2:241569585:SNP	rs35155396	7100	0.306899	0.0269797	5.56e-30	23126	T	C	0.0308	0.0053	TRUE	27	++++++?++++-++++-+++??++?-???+++++??	53.3	55.7234	0.0006126	0.0229176	0.308164	0.041937	2.01e-13	0.0578232	1.11e-07	547	FALSE	1
	cg14927745-chr2:241592765:SNP	cg14927745				Island	chr2	241562485	chr2:241592765:SNP	rs35788092	30280	0.171955	0.0085242	1.71e-90	27214	A	C	0.4462	0.0222	TRUE	35	++++++++++++++++++++++++?-++++++++-+	54.9	75.3929	5.702e-05	0.003139	0.172201	0.0133877	7.3e-38	0.0189019	9.27e-20	547	FALSE	1
	cg14927745-chr2:241615756:SNP	cg14927745				Island	chr2	241562485	chr2:241615756:SNP	rs62187793	53271	-0.501874	0.0463016	2.24e-27	8227	T	C	0.0298	0.0047	TRUE	11	?--???????-+?-??+-????-??-????????--	45.2	18.2485	0.05091	0.0211071	-0.498793	0.069486	7.06e-13	0.0844932	2.85e-09	547	FALSE	1
	cg14927745-chr2:241462456:SNP	cg14927745				Island	chr2	241562485	chr2:241462456:SNP	rs6728549	100029	0.163236	0.0106692	7.67e-53	24570	A	G	0.2323	0.0128	TRUE	32	++++-+++++++++++++?+++++++??++?+++++	26.2	42.0314	0.0893	0.0013161	0.160346	0.0129572	3.57e-35	0.0144658	1.57e-29	547	FALSE	1
	cg14927745-chr2:241532620:SNP	cg14927745				Island	chr2	241562485	chr2:241532620:SNP	rs56783920	29865	0.141747	0.0112591	2.41e-36	27141	A	C	0.1758	0.0141	TRUE	35	+-+++++++++++++++++++++--+?++++++++-	65	97.1441	5.427e-08	0.0083626	0.145913	0.0201272	4.18e-13	0.0321692	1.05e-05	547	FALSE	1
	cg14927745-chr2:241542120:SNP	cg14927745				Island	chr2	241562485	chr2:241542120:SNP	chr2.241542120	20365	-0.322348	0.0385321	5.98e-17	10677	T	G	0.0371	0.0097	TRUE	15	?--??-????--?-??---+??--?-????????+-	31.2	20.3416	0.1197	0.010641	-0.307938	0.050126	8.08e-10	0.0559861	8.53e-09	547	FALSE	1
	cg14927745-chr2:241631665:SNP	cg14927745				Island	chr2	241562485	chr2:241631665:SNP	rs76463197	69180	-0.247163	0.0125	5.08e-87	17218	T	C	0.2384	0.028	TRUE	24	---?--??-?--------?--????-??-----?--	44.6	41.527	0.0103	0.003066	-0.242925	0.0175955	2.34e-43	0.022569	6.54e-28	547	FALSE	1
	cg14927745-chr2:241630032:SNP	cg14927745				Island	chr2	241562485	chr2:241630032:SNP	rs62187803	67547	-0.259076	0.0121379	4.4e-101	18060	A	G	0.2408	0.0253	TRUE	25	------??-?--------?--????-??---?----	42.3	41.5731	0.0144	0.0027364	-0.255368	0.0167231	1.21e-52	0.0210254	6.9e-35	547	FALSE	1
	cg14927745-chr2:241581306:SNP	cg14927745				Island	chr2	241562485	chr2:241581306:SNP	rs62186549	18821	0.312982	0.012456	2.53e-139	14008	C	T	0.3354	0.038	TRUE	20	?--??--???--?--?----???-?-?-?--??---	25.5	25.511	0.1444	0.0010809	0.31294	0.0149177	1.05e-97	0.0167245	3.81e-78	547	FALSE	1
	cg14927745-chr2:241523790:SNP	cg14927745				Island	chr2	241562485	chr2:241523790:SNP	rs144304188	38695	0.295297	0.017768	5.03e-62	27098	A	G	0.0639	0.0095	TRUE	35	++++++++++++++++++++++++++?+++++++++	53.1	72.5005	0.0001329	0.0127354	0.311427	0.0277193	2.74e-29	0.0378879	6.49e-15	547	FALSE	1
	cg14927745-chr2:241569055:SNP	cg14927745				Island	chr2	241562485	chr2:241569055:SNP	rs76110943	6570	-0.388127	0.0172303	2.32e-112	20476	C	G	0.0914	0.017	TRUE	26	------??-?--?-----?-??--?-??--------	0	23.8304	0.5292	0	-0.388127	0.0172303	2.32e-112	0.0172303	2.32e-112	547	FALSE	1
	cg14927745-chr2:241626661:SNP	cg14927745				Island	chr2	241562485	chr2:241626661:SNP	rs6437366	64176	-0.196701	0.0089898	3.99e-106	24668	C	G	0.4428	0.0269	TRUE	31	------?--------+--?-----?-??--------	30.4	43.1033	0.05738	0.0011125	-0.19428	0.0113034	3.28e-66	0.0129164	2.28e-52	547	FALSE	1
	cg14927745-chr2:241510903:SNP	cg14927745				Island	chr2	241562485	chr2:241510903:SNP	rs78909033	51582	-0.18508	0.0202261	5.66e-20	11855	A	G	0.1176	0.0116	TRUE	19	-----???-?--?-?---???????-??--?--?-+	4.7	18.8975	0.3982	0.0003963	-0.184818	0.0209213	1.01e-18	0.0212346	2.88e-18	547	FALSE	1
	cg14927745-chr2:241607280:SNP	cg14927745				Island	chr2	241562485	chr2:241607280:SNP	rs6708668	44795	0.345109	0.0096575	0.00000000000000000000000000000000000000000000000000000000000000000000000000000000000000000000000000000000000000000000000000000000000000000000000000000000000000000000000000000000000000000000000000000000000000000000000000000000000000000000000000000000000000000000000000000000000000114	23883	A	G	0.3078	0.0377	TRUE	30	++++++??++++++++++?+++++?+??++++++++	44	51.8287	0.005696	0.0022421	0.343782	0.0136766	1.99e-139	0.0172599	6.11e-89	547	FALSE	1
	cg14927745-chr2:241526167:SNP	cg14927745				Island	chr2	241562485	chr2:241526167:SNP	rs56244291	36318	0.141006	0.0114604	8.65e-35	26265	A	G	0.1749	0.0135	TRUE	34	+-++++?++++++++++++++++--+?++++++++-	65.6	95.9426	4.677e-08	0.0086535	0.145319	0.0207003	2.22e-12	0.0333195	2.32e-05	547	FALSE	1
	cg14927745-chr2:241614723:SNP	cg14927745				Island	chr2	241562485	chr2:241614723:SNP	rs113208844	52238	-0.209065	0.0118102	4.04e-70	14798	C	A	0.41	0.0287	TRUE	18	?++??+????++?++?++?+??++?+???++??+++	47.7	32.5205	0.01296	0.0023645	-0.206917	0.0174861	2.63e-32	0.0225926	2.17e-20	547	FALSE	1
	cg14927745-chr2:241580697:SNP	cg14927745				Island	chr2	241562485	chr2:241580697:SNP	rs138711552	18212	0.387612	0.0220873	6.04e-69	24343	C	G	0.0434	0.007	TRUE	31	++++++??++++++++-+++++++?+??++++++++	32.3	44.3382	0.04443	0.0073722	0.391271	0.0285488	9.43e-43	0.0326436	1.62e-32	547	FALSE	1
	cg14927745-chr2:241614138:SNP	cg14927745				Island	chr2	241562485	chr2:241614138:SNP	rs4676336	51653	0.170604	0.009255	7.06e-76	23284	A	G	0.4723	0.0308	TRUE	30	+++++++?+?+++++-++?+++++?+??++++++++	37.1	46.1221	0.02282	0.0015439	0.168244	0.012303	1.43e-42	0.0147194	4.61e-31	547	FALSE	1
	cg14927745-chr2:241602739:SNP	cg14927745				Island	chr2	241562485	chr2:241602739:SNP	rs145558469	40254	0.355709	0.021238	5.79e-63	24376	T	C	0.048	0.0077	TRUE	31	++++++?+++++++++-+++++++?+??+++?++++	30.8	43.3325	0.05475	0.006346	0.362769	0.0271503	1.02e-40	0.0306765	4.34e-31	547	FALSE	1
	cg14927745-chr2:241526954:SNP	cg14927745				Island	chr2	241562485	chr2:241526954:SNP	rs112052223	35531	-0.381065	0.0173044	1.8e-107	25854	T	G	0.0717	0.0146	TRUE	33	-------?----------------?-?---------	0	21.9324	0.9092	0	-0.381065	0.0173044	1.8e-107	0.0173044	1.8e-107	547	FALSE	1
	cg14927745-chr2:241555705:SNP	cg14927745				Island	chr2	241562485	chr2:241555705:SNP	rs2975776	6780	-0.345068	0.0150658	0	22105	A	G	0.1176	0.0333	TRUE	28	-------???----------??--?-??--------	5.1	28.4412	0.3885	0.0003456	-0.344299	0.0156511	2.99e-107	0.01587	7.97e-105	547	FALSE	1
	cg14927745-chr2:241593392:SNP	cg14927745				Island	chr2	241562485	chr2:241593392:SNP	rs4561657	30907	0.173295	0.0084526	2.06e-93	27741	A	G	0.4464	0.0228	TRUE	36	+++++++++++++++++++++++++-++++++++-+	55	77.7517	4.375e-05	0.0031841	0.174433	0.013281	2.1e-39	0.0187772	2.73e-20	547	FALSE	1
	cg14927745-chr2:241591057:SNP	cg14927745				Island	chr2	241562485	chr2:241591057:SNP	rs62187763	28572	-0.250331	0.0111112	2.13e-112	23290	A	G	0.2178	0.0123	TRUE	30	-------?-?--------?-----?-??--------	21.4	36.9002	0.1488	0.0010254	-0.248821	0.0129956	1.03e-81	0.0141382	3.77e-70	547	FALSE	1
	cg14927745-chr2:241539683:SNP	cg14927745				Island	chr2	241562485	chr2:241539683:SNP	rs67745756	22802	0.141689	0.0112829	3.6e-36	27110	C	T	0.1751	0.0135	TRUE	35	-+---------------------++-?--------+	65.7	99.0129	2.867e-08	0.0086476	0.146694	0.0203557	5.74e-13	0.0328574	1.62e-05	547	FALSE	1
	cg14927745-chr2:241451117:SNP	cg14927745				Island	chr2	241562485	chr2:241451117:SNP	rs74866741	111368	-0.10173	0.0136988	1.12e-13	26467	A	G	0.117	0.0145	TRUE	34	----+--+--+--+------------??----+--+	0	32.7035	0.4818	0	-0.10173	0.0136988	1.12e-13	0.0136988	1.12e-13	547	FALSE	1
	cg14927745-chr2:241434989:SNP	cg14927745				Island	chr2	241562485	chr2:241434989:SNP	rs10933608	127496	-0.131066	0.0092372	1.07e-45	26648	C	T	0.3222	0.0183	TRUE	34	++++++++++++++++++++++++?+?+++++++++	1.9	33.6226	0.4371	5.55e-05	-0.130837	0.0093638	2.29e-44	0.0094115	4.4e-44	547	FALSE	1
	cg14927745-chr2:241401673:SNP	cg14927745				Island	chr2	241562485	chr2:241401673:SNP	rs34976040	160812	-0.202381	0.0338206	2.18e-09	15675	A	G	0.0303	0.007	TRUE	23	-------?+-----?+--?????-?-???-?--?-+	5.6	23.2985	0.385	0.0015777	-0.201479	0.0351416	9.85e-09	0.0358168	1.6e-08	547	FALSE	1
	cg14927745-chr2:241469097:SNP	cg14927745				Island	chr2	241562485	chr2:241469097:SNP	rs57354161	93388	0.182318	0.0123945	0	24544	T	C	0.1598	0.016	TRUE	32	++++++++++++++++++?+++++++??++?+++++	32.4	45.8705	0.04162	0.0023933	0.175679	0.0158113	1.11e-28	0.0183401	2.76e-23	547	FALSE	1
	cg14927745-chr2:241414345:SNP	cg14927745				Island	chr2	241562485	chr2:241414345:SNP	rs114165775	148140	-0.0913066	0.0143898	2.22e-10	25200	G	A	0.1107	0.0136	TRUE	32	++++-++?-+-+++++++++++++?+??++++-++-	0	30.3538	0.4991	0	-0.0913066	0.0143898	2.22e-10	0.0143898	2.22e-10	547	FALSE	1
	cg14927745-chr2:241528371:SNP	cg14927745				Island	chr2	241562485	chr2:241528371:SNP	rs116369887	34114	0.594405	0.0464265	1.58e-37	11034	T	G	0.0295	0.0154	TRUE	14	+?++?+????+++??+?+???????+?????+++?+	48.4	25.1727	0.02191	0.0294441	0.566071	0.0686158	1.59e-16	0.0898985	3.79e-11	547	FALSE	1
	cg14927745-chr2:241427162:SNP	cg14927745				Island	chr2	241562485	chr2:241427162:SNP	rs10206928	135323	0.0938051	0.0095836	1.27e-22	27741	T	A	0.2721	0.0361	TRUE	36	---++------+---+--+------------+----	40.5	58.8064	0.007105	0.0022765	0.0873299	0.013018	1.97e-11	0.0161021	5.69e-09	547	FALSE	1
	cg14927745-chr2:241512328:SNP	cg14927745				Island	chr2	241562485	chr2:241512328:SNP	rs3762628	50157	-0.30847	0.0234961	2.26e-39	13464	T	C	0.0761	0.0098	TRUE	17	---?-?????--?-??--?-??-??-??-??--?--	15.6	18.9615	0.2707	0.0018055	-0.307429	0.0266359	8.11e-31	0.0278451	1.6e-28	547	FALSE	1
	cg14927745-chr2:241537569:SNP	cg14927745				Island	chr2	241562485	chr2:241537569:SNP	rs17846981	24916	0.14254	0.0112759	1.25e-36	27139	C	T	0.1753	0.0135	TRUE	35	-+---------------------++-?--------+	65.3	97.9144	4.175e-08	0.0084906	0.146971	0.0202351	3.78e-13	0.0324727	1.14e-05	547	FALSE	1
	cg14927745-chr2:241614730:SNP	cg14927745				Island	chr2	241562485	chr2:241614730:SNP	rs112345084	52245	-0.208965	0.0118107	4.75e-70	14798	T	G	0.4099	0.0288	TRUE	18	?--??-????--?--?--?-??--?-???--??---	47.5	32.3514	0.0136	0.002339	-0.206802	0.0174389	1.94e-32	0.0224759	1.44e-20	547	FALSE	1
	cg14927745-chr2:241628954:SNP	cg14927745				Island	chr2	241562485	chr2:241628954:SNP	rs62187802	66469	-0.274411	0.0151125	1.11e-73	11529	G	C	0.2459	0.029	TRUE	16	?++??+????++?++?++?+?????+???++??+++	21.7	19.165	0.2064	0.0010386	-0.274301	0.0176669	2.3e-54	0.0193088	7.75e-46	547	FALSE	1
	cg14927745-chr2:241622187:SNP	cg14927745				Island	chr2	241562485	chr2:241622187:SNP	rs4081909	59702	-0.219237	0.0185837	4.03e-32	15543	T	C	0.1059	0.0137	TRUE	20	---?????-?----?---????-??--?-??-----	31.6	27.7793	0.08777	0.0033083	-0.223578	0.0240074	1.24e-20	0.0271706	7.09e-16	547	FALSE	1
	cg14927745-chr2:241594509:SNP	cg14927745				Island	chr2	241562485	chr2:241594509:SNP	rs10933627	32024	-0.117786	0.0092641	4.93e-37	26444	C	T	0.3264	0.0136	TRUE	34	+++++++?++++++++++++++++?-++++++++-+	14.7	38.671	0.2288	0.0005084	-0.11772	0.0103005	3.01e-30	0.0108561	2e-27	547	FALSE	1
	cg14927745-chr2:241530059:SNP	cg14927745				Island	chr2	241562485	chr2:241530059:SNP	rs182360139	32426	0.288446	0.0254827	0	24549	T	C	0.0327	0.0063	TRUE	30	++++++?++++?++++++++++++?-??+++++++?	31.3	42.2297	0.05354	0.0090751	0.299607	0.0325013	3.02e-20	0.0371078	7.65e-15	547	FALSE	1
	cg14927745-chr2:241447428:SNP	cg14927745				Island	chr2	241562485	chr2:241447428:SNP	rs4676436	115057	-0.102101	0.0136798	8.42e-14	26476	A	C	0.1173	0.0144	TRUE	34	----+--+--+--+------------??----+--+	2.1	33.7201	0.4325	0.000141	-0.101631	0.0139028	2.67e-13	0.0139783	2.79e-13	547	FALSE	1
	cg14927745-chr2:241606446:INDEL	cg14927745				Island	chr2	241562485	chr2:241606446:INDEL	chr2.241606446	43961	-0.162054	0.0092013	1.99e-69	23231	D	I	0.4952	0.0233	TRUE	30	-------?-?-----+--?-----?-?----?----	33.4	43.5136	0.04079	0.0012937	-0.161296	0.0118545	3.68e-42	0.0138062	8.16e-32	547	FALSE	1
	cg14927745-chr2:241611236:SNP	cg14927745				Island	chr2	241562485	chr2:241611236:SNP	rs373643606	48751	0.359431	0.026939	1.31e-40	14808	G	A	0.0483	0.007	TRUE	18	?--??-????--?--?+-?-??--?-???--??---	45.4	31.1095	0.01937	0.0113163	0.366963	0.0399728	4.3e-20	0.0492976	3.08e-13	547	FALSE	1
	cg14927745-chr2:241448176:INDEL	cg14927745				Island	chr2	241562485	chr2:241448176:INDEL	chr2.241448176	114309	-0.0907698	0.0093249	2.16e-22	23215	I	D	0.5389	0.0394	TRUE	30	++++-++?-?+-+++-++?++++-?+?++++?++-+	44.9	52.5845	0.004688	0.0021582	-0.0887496	0.0132731	2.29e-11	0.0169084	7.95e-08	547	FALSE	1
	cg14927745-chr2:241630238:SNP	cg14927745				Island	chr2	241562485	chr2:241630238:SNP	rs78446676	67753	0.253011	0.0125914	8.32e-90	14271	T	C	0.3119	0.0187	TRUE	20	+++?????+?++?+++++?+???+?-??+++?+?-+	74.2	73.558	2.333e-08	0.0093027	0.250437	0.0262341	1.35e-21	0.0487471	2.1e-07	547	FALSE	1
	cg14927745-chr2:241522819:SNP	cg14927745				Island	chr2	241562485	chr2:241522819:SNP	rs115104938	39666	0.302576	0.0224452	2.03e-41	17257	T	G	0.0632	0.0103	TRUE	22	?++??++???++?++?++++??++++?+?++??+++	45.5	38.5466	0.01111	0.0096109	0.322588	0.0331308	2.1e-22	0.0411993	2.07e-13	547	FALSE	1
	cg14927745-chr2:241608974:SNP	cg14927745				Island	chr2	241562485	chr2:241608974:SNP	rs115355318	46489	0.357788	0.0207844	2.08e-66	25961	G	A	0.0474	0.0083	TRUE	33	----------------+-------?-??--------	27.4	44.0591	0.07603	0.0054765	0.364143	0.0257838	2.74e-45	0.028617	7.22e-36	547	FALSE	1
	cg14927745-chr2:241604696:SNP	cg14927745				Island	chr2	241562485	chr2:241604696:SNP	rs10203408	42211	-0.161872	0.0085857	2.74e-79	26706	T	C	0.4934	0.0235	TRUE	34	---------------+--?-------?---------	28.9	46.394	0.06096	0.0010317	-0.161215	0.0106281	5.7e-52	0.0120704	5.24e-41	547	FALSE	1
	cg14927745-chr2:241587029:SNP	cg14927745				Island	chr2	241562485	chr2:241587029:SNP	rs4676346	24544	0.385781	0.009558	0	27255	C	T	0.2537	0.0362	TRUE	35	------------------------?-----------	56.8	78.6909	2.117e-05	0.004264	0.387153	0.0153534	2.67e-140	0.0221213	4.15e-68	547	FALSE	1
	cg14927745-chr2:241595234:SNP	cg14927745				Island	chr2	241562485	chr2:241595234:SNP	rs62187770	32749	-0.249416	0.0111118	1.39e-111	23290	T	A	0.2179	0.0121	TRUE	30	+++++++?+?++++++++?+++++?+??++++++++	20.1	36.2797	0.1656	0.0009449	-0.247812	0.0128669	1.17e-82	0.0139011	5.52e-72	547	FALSE	1
	cg14927745-chr2:241518105:SNP	cg14927745				Island	chr2	241562485	chr2:241518105:SNP	rs1127207	44380	0.301488	0.0180172	7.49e-63	26610	C	G	0.0631	0.0095	TRUE	34	++++?+++++++++++++++++++++?+++++++++	52	68.7696	0.0002569	0.0121856	0.320412	0.0278158	1.06e-30	0.0375465	9.77e-16	547	FALSE	1
	cg14927745-chr2:241528389:SNP	cg14927745				Island	chr2	241562485	chr2:241528389:SNP	rs55999124	34096	0.140975	0.0114597	8.86e-35	26267	A	G	0.1748	0.0134	TRUE	34	+-++++?++++++++++++++++--+?++++++++-	65.8	96.5936	3.74e-08	0.0087417	0.145244	0.0207628	2.65e-12	0.0335435	2.64e-05	547	FALSE	1
	cg14927745-chr2:241604167:SNP	cg14927745				Island	chr2	241562485	chr2:241604167:SNP	rs75731637	41682	0.359011	0.0209199	5.19e-66	25101	C	T	0.048	0.0078	TRUE	32	------?---------+-------?-??--------	28.8	43.5681	0.06646	0.0057907	0.365855	0.0262694	4.34e-44	0.0294013	2.73e-34	547	FALSE	1
	cg14927745-chr2:241623919:SNP	cg14927745				Island	chr2	241562485	chr2:241623919:SNP	rs150969704	61434	0.350906	0.0223041	9.01e-56	23227	T	C	0.0459	0.0077	TRUE	28	+++?+??+++++++++-+?++?++?+??++++++++	23.5	35.3114	0.1312	0.0043821	0.354831	0.0268141	5.66e-40	0.02917	2.48e-33	547	FALSE	1
	cg14927745-chr2:241631476:SNP	cg14927745				Island	chr2	241562485	chr2:241631476:SNP	rs4328629	68991	-0.22855	0.0104249	1.55e-106	18106	C	G	0.4777	0.0281	TRUE	25	---?--??-?-----+--?--??-?-??---?----	46.3	44.7092	0.006304	0.0023791	-0.221564	0.0149417	9.57e-50	0.0194204	5.67e-32	547	FALSE	1
	cg07248223-chr17:38763866:SNP	cg07248223	TSS1500;TSS200;TSS200	NM_001301718.2;NM_001301716.2;NM_001301717.2	CCR7;CCR7;CCR7		chr17	38717275	chr17:38763866:SNP	rs803123	46591	-0.225951	0.0203631	1.31e-28	14573	T	A	0.0949	0.0204	TRUE	20	?+++++?+++-+???+++?+??++?-??+?????++	63	51.2953	8.429e-05	0.0145205	-0.246908	0.0357388	4.89e-12	0.0549754	3.96e-05	279	TRUE	1
	cg01101873-chr10:101282968:SNP	cg01101873					chr1	3269478	chr10:101282968:SNP	rs10883361		-0.123101	0.0086025	1.9e-46	26422	T	C	0.4742	0.0173	FALSE	34	-------?-----+-+--------?-----------	36	51.5489	0.02088	0.0014333	-0.121726	0.0112581	3.01e-27	0.0134378	5.15e-20	46	FALSE	1
	cg01101873-chr10:101277639:INDEL	cg01101873					chr1	3269478	chr10:101277639:INDEL	chr10.101277639		-0.124235	0.0089841	1.72e-43	24249	I	D	0.4675	0.0175	FALSE	32	+++++++?+?+++-+-++++++++?++++++?++++	36.9	49.104	0.02056	0.0015314	-0.122301	0.0118694	6.77e-25	0.0142308	2.55e-18	46	FALSE	1
	cg01101873-chr21:36350830:SNP	cg01101873					chr1	3269478	chr21:36350830:SNP	rs2834711		-0.12825	0.0090383	1.06e-45	25925	G	A	0.3682	0.0172	FALSE	33	++++++++++++++++++++++++?+??++++++++	8.4	34.9236	0.3308	0.0002498	-0.128669	0.0096055	6.44e-41	0.009864	1.2e-38	46	FALSE	1
	cg01101873-chr10:101274425:SNP	cg01101873					chr1	3269478	chr10:101274425:SNP	rs7095953		0.154656	0.0092099	2.78e-63	27704	C	T	0.2969	0.0354	FALSE	36	------------------------------------	15.6	41.4602	0.2096	0.0005706	0.154107	0.0102938	1.14e-50	0.0109099	1.29e-45	46	FALSE	1
	cg01101873-chr10:101283389:SNP	cg01101873					chr1	3269478	chr10:101283389:SNP	rs10748782		-0.11865	0.0088431	4.79e-41	24965	T	G	0.4612	0.0203	FALSE	33	-------?-?---+-+--------?-----------	27.8	44.3446	0.072	0.0010097	-0.117421	0.0108391	2.4e-27	0.0122545	3.59e-22	46	FALSE	1
	cg01101873-chr10:101286480:SNP	cg01101873					chr1	3269478	chr10:101286480:SNP	rs6584281		-0.119298	0.0083824	5.81e-46	27712	A	G	0.4786	0.0173	FALSE	36	-------------+----------------------	28.4	48.8727	0.05981	0.0010151	-0.117094	0.0103054	6.44e-30	0.0117049	2.15e-24	46	FALSE	1
	cg01101873-chr10:101275806:SNP	cg01101873					chr1	3269478	chr10:101275806:SNP	rs11190131		0.148659	0.0085833	3.35e-67	27684	A	G	0.3913	0.0305	FALSE	36	++++++++++++++++-+++++++++++++++++++	2.7	35.987	0.4221	7.57e-05	0.148317	0.0087549	2.24e-64	0.0088254	1.15e-63	46	FALSE	1
	cg01101873-chr3:128345179:SNP	cg01101873					chr1	3269478	chr3:128345179:SNP	rs2712417		0.111076	0.008785	1.21e-36	26856	A	G	0.3911	0.0191	FALSE	35	++-+++?+++++++++-++++++++-++++++++-+	20.6	42.8361	0.1423	0.0007119	0.109902	0.0102147	5.36e-27	0.0110681	1.06e-23	46	FALSE	1
	cg01101873-chr10:101282553:SNP	cg01101873					chr1	3269478	chr10:101282553:SNP	rs4919342		-0.125501	0.0084797	1.46e-49	27183	G	C	0.4687	0.0173	FALSE	35	+++++++++++++-+-++++++++?+++++++++++	30.7	49.096	0.04533	0.0011316	-0.123632	0.0106185	2.49e-31	0.0122447	1.19e-24	46	FALSE	1
	cg01101873-chr10:101285650:SNP	cg01101873					chr1	3269478	chr10:101285650:SNP	rs7916751		-0.11881	0.0083826	1.34e-45	27715	T	A	0.4782	0.0173	FALSE	36	+++++++++++++-++++++++++++++++++++++	27.7	48.3797	0.06565	0.000979	-0.116699	0.0102472	4.78e-30	0.011587	1.14e-24	46	FALSE	1
	cg01101873-chr10:101281014:SNP	cg01101873					chr1	3269478	chr10:101281014:SNP	rs7077040		-0.126226	0.008479	4.01e-50	27218	C	G	0.4688	0.017	FALSE	35	-------------+-+--------?-----------	33.2	50.9226	0.03118	0.0012683	-0.124352	0.0108337	1.7e-30	0.0126992	2.8e-23	46	FALSE	1
	cg01101873-chr10:101291367:SNP	cg01101873					chr1	3269478	chr10:101291367:SNP	rs10883369		0.15384	0.0093715	1.48e-60	27221	T	C	0.2879	0.0358	FALSE	35	++++++++++++++++++++++++?+++++++++++	10.1	37.8049	0.2996	0.0003483	0.153392	0.0100673	2.02e-52	0.0104203	2.52e-49	46	FALSE	1
	cg01101873-chr10:101292484:SNP	cg01101873					chr1	3269478	chr10:101292484:SNP	rs10883373		-0.120389	0.0083838	9.25e-47	27718	G	A	0.4805	0.0178	FALSE	36	+++++++++++++-+-++++++++++++++++++++	28.2	48.7442	0.06129	0.001006	-0.118341	0.010292	1.35e-30	0.011676	6.3e-25	46	FALSE	1
	cg01101873-chr10:101292390:SNP	cg01101873					chr1	3269478	chr10:101292390:SNP	rs11190141		0.144737	0.0086116	2.16e-63	27720	T	C	0.3816	0.0316	FALSE	36	++++++++++++++++-+++++++++++++++++++	0	32.8344	0.5731	0	0.144737	0.0086116	2.16e-63	0.0086116	2.16e-63	46	FALSE	1
	cg01101873-chr3:128336517:SNP	cg01101873					chr1	3269478	chr3:128336517:SNP	rs2811488		0.109865	0.008651	5.93e-37	27702	C	T	0.3913	0.0197	FALSE	36	--+-------------+--------+--------+-	18.2	42.7815	0.1717	0.0006069	0.108792	0.0098686	2.92e-28	0.0105743	2.76e-25	46	FALSE	1
	cg01101873-chr10:101289653:SNP	cg01101873					chr1	3269478	chr10:101289653:SNP	rs1548964		-0.119493	0.0083811	4.03e-46	27720	G	C	0.4789	0.0175	FALSE	36	+++++++++++++-++++++++++++++++++++++	28.4	48.8626	0.05992	0.001014	-0.117293	0.0103029	5e-30	0.0117006	1.74e-24	46	FALSE	1
	cg01101873-chr3:128355509:SNP	cg01101873					chr1	3269478	chr3:128355509:SNP	rs9880064		0.111047	0.0087875	1.32e-36	26862	A	G	0.39	0.0194	FALSE	35	++-+++?+++++++++-++++++++-++++++++-+	22.1	43.6436	0.1244	0.0007774	0.109862	0.0103302	2.05e-26	0.0112799	7.22e-23	46	FALSE	1
	cg01101873-chr3:128331870:SNP	cg01101873					chr1	3269478	chr3:128331870:SNP	rs9841161		0.11301	0.0087473	3.5e-38	27205	A	G	0.3897	0.018	FALSE	35	++-+++++++++++++-+++++++?+++++++++++	7.5	36.7691	0.3418	0.000221	0.112303	0.0092352	5.06e-34	0.0094597	6.78e-33	46	FALSE	1
	cg01101873-chr10:101285872:SNP	cg01101873					chr1	3269478	chr10:101285872:SNP	rs10748783		-0.119524	0.0083809	3.8e-46	27710	C	A	0.4774	0.0175	FALSE	36	+++++++++++++-++++++++++++++++++++++	29.7	49.8029	0.04999	0.0010828	-0.117265	0.0104131	2.04e-29	0.0119255	1.21e-23	46	FALSE	1
	cg01101873-chr10:101274465:SNP	cg01101873					chr1	3269478	chr10:101274465:SNP	rs7081330		0.148531	0.0085805	3.93e-67	27704	G	A	0.3918	0.0304	FALSE	36	----------------+-------------------	1.7	35.5984	0.4401	4.59e-05	0.148318	0.0086854	2.21e-65	0.0087272	5.9e-65	46	FALSE	1
	cg01101873-chr21:36349625:SNP	cg01101873					chr1	3269478	chr21:36349625:SNP	rs2834709		-0.12908	0.0089486	3.62e-47	26450	T	C	0.3679	0.0171	FALSE	34	--------------------------??--------	4.4	34.5033	0.3958	0.0001257	-0.129334	0.0092374	1.53e-44	0.0093562	2.69e-43	46	FALSE	1
	cg01101873-chr3:128359958:SNP	cg01101873					chr1	3269478	chr3:128359958:SNP	rs2811496		0.111684	0.0091438	2.61e-34	24735	A	T	0.3918	0.019	FALSE	33	++-++++?+?++++++-++++++++-+++++?++-+	22.7	41.3722	0.124	0.0008207	0.110136	0.0108069	2.17e-24	0.0118219	3.48e-21	46	FALSE	1
	cg01101873-chr10:101271982:SNP	cg01101873					chr1	3269478	chr10:101271982:SNP	rs11190127		0.135914	0.009091	1.55e-50	24970	A	C	0.3851	0.0324	FALSE	33	+++++++?+?++++++-+++++++?+++++++++++	8.6	35.0093	0.3271	0.0002602	0.13571	0.0096784	1.15e-44	0.0099459	1.64e-42	46	FALSE	1
	cg01101873-chr10:101283328:SNP	cg01101873					chr1	3269478	chr10:101283328:SNP	rs10786557		-0.122785	0.0084558	8.93e-48	27200	C	G	0.4743	0.0165	FALSE	35	-------------+-+--------?-----------	29.5	48.2012	0.0541	0.0010585	-0.120896	0.010482	8.92e-31	0.0119876	1.28e-24	46	FALSE	1
	cg01101873-chr3:128370510:SNP	cg01101873					chr1	3269478	chr3:128370510:SNP	rs10934859		0.108343	0.0090714	7.04e-33	25113	T	C	0.3944	0.0192	FALSE	33	++-++++?+?++++++-++++?+++-++++++++-+	30.1	45.793	0.0542	0.001188	0.105869	0.0113353	9.65e-21	0.0129814	7.06e-17	46	FALSE	1
	cg01101873-chr10:101287990:SNP	cg01101873					chr1	3269478	chr10:101287990:SNP	rs10883367		-0.119122	0.0083799	7.37e-46	27724	T	C	0.4788	0.0174	FALSE	36	-------------+----------------------	28.1	48.6793	0.06205	0.0010003	-0.116899	0.0102795	5.77e-30	0.011655	1.6e-24	46	FALSE	1
	cg01101873-chr3:128376269:SNP	cg01101873					chr1	3269478	chr3:128376269:SNP	rs62270806		0.110245	0.0092242	6.36e-33	24387	C	T	0.3886	0.0209	FALSE	32	--+----?-?------+----?---+-----?--+-	25.7	41.743	0.09424	0.0009587	0.108177	0.011159	3.19e-22	0.0124208	6.94e-19	46	FALSE	1
	cg01101873-chr10:101289735:SNP	cg01101873					chr1	3269478	chr10:101289735:SNP	rs1548962		-0.118504	0.0083833	2.29e-45	27713	G	C	0.4795	0.0175	FALSE	36	+++++++++++++-++++++++++++++++++++++	27.6	48.3111	0.0665	0.0009742	-0.116377	0.0102404	6.28e-30	0.0115716	1.3e-24	46	FALSE	1
	cg01101873-chr3:128338953:SNP	cg01101873					chr1	3269478	chr3:128338953:SNP	rs1127030		0.111407	0.0087851	7.51e-37	26848	T	C	0.3919	0.0193	FALSE	35	++-+++?+++++++++-++++++++-++++++++-+	19.5	42.2168	0.1574	0.000662	0.110285	0.0101271	1.28e-27	0.0109082	1.73e-24	46	FALSE	1
	cg01101873-chr10:101277816:SNP	cg01101873					chr1	3269478	chr10:101277816:SNP	rs7096296		-0.126206	0.0084778	4.03e-50	27224	C	T	0.4688	0.0171	FALSE	35	+++++++++++++-+-++++++++?+++++++++++	33.1	50.7885	0.03207	0.001258	-0.124323	0.010817	1.43e-30	0.012664	2.15e-23	46	FALSE	1
	cg01101873-chr10:101287944:SNP	cg01101873					chr1	3269478	chr10:101287944:SNP	rs11190137		0.153093	0.0092957	6.11e-61	27721	C	A	0.287	0.0356	FALSE	36	------------------------------------	12.6	40.0245	0.2569	0.000452	0.152522	0.0101655	6.92e-51	0.0106302	5.05e-47	46	FALSE	1
	cg01101873-chr10:101286154:SNP	cg01101873					chr1	3269478	chr10:101286154:SNP	rs12360459		0.152658	0.0092973	1.38e-60	27716	G	A	0.2869	0.0356	FALSE	36	------------------------------------	13.2	40.3415	0.2459	0.0004807	0.152038	0.010217	4.39e-50	0.0107162	4.78e-46	46	FALSE	1
	cg01101873-chr10:101284237:SNP	cg01101873					chr1	3269478	chr10:101284237:SNP	rs4409764		-0.120158	0.0083845	1.4e-46	27715	T	G	0.4791	0.0175	FALSE	36	-------------+----------------------	28.1	48.6519	0.06237	0.0009994	-0.118067	0.0102825	1.62e-30	0.0116549	6.37e-25	46	FALSE	1
	cg01101873-chr10:101284345:SNP	cg01101873					chr1	3269478	chr10:101284345:SNP	rs4129134		-0.119981	0.0083845	1.9e-46	27715	C	G	0.479	0.0175	FALSE	36	-------------+----------------------	27.1	47.9933	0.07056	0.0009512	-0.11796	0.0102041	6.57e-31	0.0114971	1.7e-25	46	FALSE	1
	cg01101873-chr3:128332082:SNP	cg01101873					chr1	3269478	chr3:128332082:SNP	rs2712405		0.112359	0.0088774	1.03e-36	26421	T	C	0.3904	0.0184	FALSE	34	++-++++?++++++++-+++++++?+++++++++++	9.9	36.6131	0.3047	0.0002975	0.111423	0.009536	1.53e-31	0.0098494	3.83e-30	46	FALSE	1
	cg01101873-chr3:128363332:SNP	cg01101873					chr1	3269478	chr3:128363332:SNP	rs2811497		0.109536	0.0086488	9.25e-37	27713	C	T	0.3906	0.0188	FALSE	36	--+-------------+--------+--------+-	19	43.1936	0.161	0.0006388	0.108365	0.0099227	9.16e-28	0.0106735	1.04e-24	46	FALSE	1
	cg01101873-chr21:36344353:SNP	cg01101873					chr1	3269478	chr21:36344353:SNP	rs2834708		-0.120851	0.0092556	5.79e-39	24960	T	C	0.3608	0.0149	FALSE	31	------------------?-?--??-?---------	11.9	34.0484	0.2789	0.0003638	-0.120774	0.0100897	5.1e-33	0.0105046	1.25e-30	46	FALSE	1
	cg01101873-chr3:128361276:SNP	cg01101873					chr1	3269478	chr3:128361276:SNP	rs3122175		0.109513	0.0086481	9.46e-37	27715	C	T	0.3905	0.0188	FALSE	36	--+-------------+--------+--------+-	18.9	43.1437	0.1623	0.0006348	0.108347	0.009915	8.51e-28	0.0106603	9.34e-25	46	FALSE	1
	cg01101873-chr3:128348735:INDEL	cg01101873					chr1	3269478	chr3:128348735:INDEL	chr3.128348735		0.11425	0.0093918	4.79e-34	23389	D	I	0.3922	0.0199	FALSE	31	++-+++??+?++++++-+++++++?-+++++?++-+	23.5	39.2375	0.1205	0.0008566	0.11276	0.0111939	7.24e-24	0.0122837	1.39e-20	46	FALSE	1
	cg01101873-chr10:101292455:SNP	cg01101873					chr1	3269478	chr10:101292455:SNP	rs10883371		-0.119106	0.0083819	7.94e-46	27718	C	A	0.48	0.0179	FALSE	36	+++++++++++++-+-++++++++++++++++++++	29.2	49.4175	0.05388	0.0010548	-0.116816	0.0103675	1.9e-29	0.0118346	7.95e-24	46	FALSE	1
	cg01101873-chr10:101308656:SNP	cg01101873					chr1	3269478	chr10:101308656:SNP	rs1468889		-0.103037	0.0084991	7.96e-34	27221	G	A	0.4668	0.0145	FALSE	35	+++++++++++++-++++++++++?+++++++++++	21.3	43.2294	0.1333	0.0006948	-0.101783	0.0099029	8.85e-25	0.0108062	1.5e-21	46	FALSE	1
	cg01101873-chr10:101280279:SNP	cg01101873					chr1	3269478	chr10:101280279:SNP	rs17094148		0.154175	0.0092131	7.38e-63	27721	G	A	0.2961	0.0354	FALSE	36	------------------------------------	15.5	41.4328	0.2104	0.0005685	0.153541	0.0102924	2.52e-50	0.0109065	2.28e-45	46	FALSE	1
	cg01101873-chr3:128330512:INDEL	cg01101873					chr1	3269478	chr3:128330512:INDEL	chr3.128330512		0.113638	0.0092573	1.23e-34	24250	D	I	0.3925	0.0193	FALSE	32	++-++++?+?++++++-+++++++?++++++?++++	8.3	33.7884	0.3342	0.0002505	0.112695	0.0098377	2.21e-30	0.01009	2.01e-29	46	FALSE	1
	cg01101873-chr3:128341718:SNP	cg01101873					chr1	3269478	chr3:128341718:SNP	rs2335236		0.109753	0.0089763	2.23e-34	25569	C	T	0.3959	0.0191	FALSE	33	--+---??--------+-------?+--------+-	28.3	44.6114	0.06839	0.0010639	0.108211	0.0110734	1.48e-22	0.0125139	1.78e-18	46	FALSE	1
	cg01101873-chr10:101298451:SNP	cg01101873					chr1	3269478	chr10:101298451:SNP	rs1332099		-0.112716	0.0086209	4.6e-39	26404	T	C	0.4599	0.0142	FALSE	34	-------?-----+----------?-----------	17.2	39.8694	0.1911	0.000533	-0.111751	0.0097565	2.25e-30	0.0104155	2.71e-27	46	FALSE	1
	cg01101873-chr3:128332925:SNP	cg01101873					chr1	3269478	chr3:128332925:SNP	rs9828893		0.112994	0.0087482	3.65e-38	27200	T	C	0.3898	0.0181	FALSE	35	++-+++++++++++++-+++++++?+++++++++++	4.5	35.591	0.3933	0.000127	0.112546	0.0090358	1.31e-35	0.0091576	5.6e-35	46	FALSE	1
	cg01101873-chr10:101283330:SNP	cg01101873					chr1	3269478	chr10:101283330:SNP	rs10748781		-0.117636	0.0090242	7.67e-39	24527	C	A	0.4225	0.0245	FALSE	32	+++++++?+?+++-++++?+++++?+++++++++++	29.5	43.9709	0.06137	0.0011059	-0.116453	0.0112018	2.59e-25	0.0128	3.92e-20	46	FALSE	1
	cg01101873-chr10:101278099:SNP	cg01101873					chr1	3269478	chr10:101278099:SNP	rs6584278		0.148945	0.0085794	1.63e-67	27710	T	C	0.3921	0.0301	FALSE	36	++++++++++++++++-+++++++++++++++++++	1.7	35.5977	0.4401	4.58e-05	0.14874	0.0086842	9.23e-66	0.0087259	2.51e-65	46	FALSE	1
	cg01101873-chr10:101278055:SNP	cg01101873					chr1	3269478	chr10:101278055:SNP	rs6584277		-0.125475	0.0084805	1.56e-49	27223	A	G	0.4678	0.0168	FALSE	35	-------------+-+--------?-----------	32.2	50.1287	0.03676	0.0012093	-0.123736	0.0107431	1.07e-30	0.0125034	1.07e-23	46	FALSE	1
	cg01101873-chr21:36342691:SNP	cg01101873					chr1	3269478	chr21:36342691:SNP	rs2834706		-0.123023	0.0096982	7.14e-37	23172	C	T	0.3492	0.0186	FALSE	29	++++++++++++++++++?+?++??+??+++++?++	0	25.9072	0.5781	0	-0.123023	0.0096982	7.14e-37	0.0096982	7.14e-37	46	FALSE	1
	cg01101873-chr3:128342393:INDEL	cg01101873					chr1	3269478	chr3:128342393:INDEL	chr3.128342393		0.109152	0.0095266	2.15e-30	22361	D	I	0.4148	0.0288	FALSE	29	++-?++??+?++++++-++++++??-+++++?++++	33.4	42.0131	0.04324	0.0013414	0.107553	0.012279	1.97e-18	0.0142943	2.24e-14	46	FALSE	1
	cg01101873-chr3:128330526:SNP	cg01101873					chr1	3269478	chr3:128330526:SNP	rs67445542		0.113512	0.0088786	1.99e-37	26343	T	C	0.3892	0.0191	FALSE	34	++-+++?+++++++++-+++++++?+++++++++++	7.6	35.7054	0.3424	0.0002228	0.112803	0.0093813	2.65e-33	0.0096065	3.22e-32	46	FALSE	1
	cg01101873-chr10:101282604:INDEL	cg01101873					chr1	3269478	chr10:101282604:INDEL	chr10.101282604		-0.12433	0.0089813	1.4e-43	24250	D	I	0.4667	0.0166	FALSE	32	-------?-?---+-+--------?------?----	37.3	49.4577	0.01898	0.0015602	-0.122173	0.0119083	1.07e-24	0.0143289	4.07e-18	46	FALSE	1
	cg01101873-chr10:101289998:SNP	cg01101873					chr1	3269478	chr10:101289998:SNP	rs10883368		0.151872	0.0092929	4.89e-60	27718	G	A	0.2874	0.0358	FALSE	36	------------------------------------	13.5	40.4812	0.2412	0.0004928	0.151311	0.0102337	1.82e-49	0.0107482	2.48e-45	46	FALSE	1
	cg01101873-chr3:128351755:SNP	cg01101873					chr1	3269478	chr3:128351755:SNP	rs2811490		0.111004	0.0087856	1.36e-36	26856	C	T	0.3908	0.0192	FALSE	35	--+---?---------+--------+--------+-	21.2	43.1342	0.1355	0.000736	0.109815	0.0102571	9.52e-27	0.0111459	2.3e-23	46	FALSE	1
	cg01101873-chr10:101286984:SNP	cg01101873					chr1	3269478	chr10:101286984:SNP	rs10883362		-0.119262	0.0083824	6.16e-46	27718	C	T	0.4787	0.0173	FALSE	36	+++++++++++++-++++++++++++++++++++++	27.9	48.5179	0.06397	0.0009891	-0.117109	0.0102637	3.73e-30	0.0116198	1.03e-24	46	FALSE	1
	cg01101873-chr10:101274251:INDEL	cg01101873					chr1	3269478	chr10:101274251:INDEL	chr10.101274251		0.147375	0.0091508	2.35e-58	24250	D	I	0.395	0.0309	FALSE	32	+++++++?+?++++++-+++++++?++++++?++++	2.9	31.9207	0.4206	8.08e-05	0.147016	0.0093475	9.75e-56	0.0094226	3.85e-55	46	FALSE	1
	cg01101873-chr10:101288238:SNP	cg01101873					chr1	3269478	chr10:101288238:SNP	rs12414770		0.153114	0.0092927	5.39e-61	27724	T	G	0.287	0.0355	FALSE	36	++++++++++++++++++++++++++++++++++++	12.3	39.9016	0.2613	0.0004407	0.15256	0.010142	3.87e-51	0.0105941	2.41e-47	46	FALSE	1
	cg01101873-chr3:128362548:SNP	cg01101873					chr1	3269478	chr3:128362548:SNP	rs9879928		0.109894	0.0086499	5.57e-37	27710	C	G	0.3905	0.0188	FALSE	36	++-+++++++++++++-++++++++-++++++++-+	18.2	42.7624	0.1722	0.0006053	0.108805	0.0098652	2.76e-28	0.0105683	2.52e-25	46	FALSE	1
	cg01101873-chr10:101287681:SNP	cg01101873					chr1	3269478	chr10:101287681:SNP	rs11190136		0.153048	0.0092956	6.6e-61	27719	G	A	0.287	0.0356	FALSE	36	------------------------------------	13.2	40.3446	0.2458	0.0004808	0.152449	0.0102155	2.33e-50	0.0107151	2.78e-46	46	FALSE	1
	cg01101873-chr10:101287785:SNP	cg01101873					chr1	3269478	chr10:101287785:SNP	rs10883366		-0.119122	0.0083799	7.37e-46	27724	G	A	0.4788	0.0174	FALSE	36	+++++++++++++-++++++++++++++++++++++	28.1	48.6793	0.06205	0.0010003	-0.116899	0.0102795	5.77e-30	0.011655	1.6e-24	46	FALSE	1
	cg01101873-chr10:101274058:SNP	cg01101873					chr1	3269478	chr10:101274058:SNP	rs7095491		-0.126269	0.008477	3.53e-50	27207	T	C	0.4693	0.0172	FALSE	35	-------------+-+--------?-----------	33.5	51.1404	0.02979	0.0012841	-0.124302	0.0108566	2.37e-30	0.0127505	4.04e-23	46	FALSE	1
	cg01101873-chr3:128372729:SNP	cg01101873					chr1	3269478	chr3:128372729:SNP	rs4494950		0.107885	0.00906	1.08e-32	25110	T	C	0.3941	0.0184	FALSE	33	++-++++?+?++++++-++++?+++-++++++++-+	30.8	46.2454	0.04949	0.0012239	0.105541	0.0113821	1.82e-20	0.0130931	1.73e-16	46	FALSE	1
	cg01101873-chr10:101291472:SNP	cg01101873					chr1	3269478	chr10:101291472:SNP	rs10883370		-0.121262	0.0084541	1.17e-46	27231	T	C	0.4787	0.0173	FALSE	35	-------------+-+--------?-----------	27.3	46.7817	0.071	0.0009523	-0.119458	0.0103085	4.72e-31	0.0116322	1.91e-25	46	FALSE	1
	cg01101873-chr10:101286207:SNP	cg01101873					chr1	3269478	chr10:101286207:SNP	rs7917446		-0.118656	0.0083835	1.78e-45	27712	T	C	0.4781	0.0171	FALSE	36	-------------+----------------------	27.9	48.5386	0.06372	0.0009909	-0.116481	0.0102671	7.84e-30	0.0116264	1.87e-24	46	FALSE	1
	cg01101873-chr10:101287610:SNP	cg01101873					chr1	3269478	chr10:101287610:SNP	rs10786558		0.111296	0.0085264	6.11e-39	27715	A	G	0.4263	0.0161	FALSE	36	+++++++++++++-+-++++++++--++++++++++	31.7	51.2341	0.03761	0.0012289	0.110863	0.0107557	6.53e-25	0.0124813	4.79e-19	46	FALSE	1
	cg01101873-chr3:128381886:SNP	cg01101873					chr1	3269478	chr3:128381886:SNP	rs7624160		0.108507	0.0089024	3.58e-34	26067	G	T	0.3901	0.0188	FALSE	33	--+----?--------+----?--?+--------+-	27.6	44.1796	0.07431	0.0010097	0.106481	0.0108972	1.49e-22	0.0122908	1.06e-18	46	FALSE	1
	cg01101873-chr3:128383097:SNP	cg01101873					chr1	3269478	chr3:128383097:SNP	rs2001703		0.110354	0.0087743	2.83e-36	26848	A	G	0.389	0.0189	FALSE	34	++-+++++++++++++-++++?++?-++++++++-+	25.6	44.328	0.09	0.0009108	0.108777	0.0105656	7.39e-25	0.0117863	7.75e-21	46	FALSE	1
	cg01101873-chr21:36350221:SNP	cg01101873					chr1	3269478	chr21:36350221:SNP	rs2834710		-0.121946	0.0091827	3.03e-40	25179	T	C	0.3672	0.0171	FALSE	32	-------?----------------?-??--------	0	24.527	0.7885	0	-0.121946	0.0091827	3.03e-40	0.0091827	3.03e-40	46	FALSE	1
	cg01101873-chr3:128365685:SNP	cg01101873					chr1	3269478	chr3:128365685:SNP	rs2811499		0.109743	0.0090208	4.74e-34	25460	A	G	0.3911	0.0191	FALSE	34	++-++++?+?++++++-++++++++-++++++++-+	24.2	43.5575	0.1034	0.0008983	0.107992	0.0107791	1.26e-23	0.0119067	3.06e-20	46	FALSE	1
	cg01101873-chr3:128337917:SNP	cg01101873					chr1	3269478	chr3:128337917:SNP	rs58977394		0.109839	0.0086496	6.02e-37	27709	C	T	0.3917	0.0191	FALSE	36	--+-------------+--------+--------+-	19.3	43.3749	0.1565	0.000653	0.1087	0.0099483	8.61e-28	0.0107194	1.22e-24	46	FALSE	1
	cg01101873-chr21:36351891:SNP	cg01101873					chr1	3269478	chr21:36351891:SNP	rs2834712		-0.130251	0.0090263	3.34e-47	25918	C	T	0.3704	0.018	FALSE	33	++++++++++++++++++++++++?+??++++++++	4.9	33.6601	0.387	0.0001415	-0.130463	0.009357	3.48e-44	0.0094945	7.87e-43	46	TRUE	1
	cg01101873-chr3:128346214:SNP	cg01101873					chr1	3269478	chr3:128346214:SNP	rs2712371		0.111041	0.0087856	1.29e-36	26856	G	A	0.3911	0.0191	FALSE	35	--+---?---------+--------+--------+-	19.9	42.4377	0.1519	0.0006799	0.109883	0.0101592	2.89e-27	0.0109659	4.24e-24	46	FALSE	1
	cg01101873-chr3:128356852:SNP	cg01101873					chr1	3269478	chr3:128356852:SNP	rs1697		0.109676	0.0086451	7.02e-37	27724	C	T	0.3907	0.0188	FALSE	36	--+-------------+--------+--------+-	19.2	43.3274	0.1577	0.0006486	0.108512	0.0099362	9.16e-28	0.010702	1.21e-24	46	FALSE	1
	cg01101873-chr10:101292483:SNP	cg01101873					chr1	3269478	chr10:101292483:SNP	rs10883372		-0.120013	0.008385	1.82e-46	27691	T	A	0.4811	0.018	FALSE	36	+++++++++++++-+-++++++++++++++++++++	29.2	49.4429	0.05361	0.0010574	-0.117807	0.010374	6.92e-30	0.011845	3.99e-24	46	FALSE	1
	cg01101873-chr10:101281158:SNP	cg01101873					chr1	3269478	chr10:101281158:SNP	rs10883360		0.148601	0.0085821	3.62e-67	27712	G	C	0.3918	0.0302	FALSE	36	----------------+-------------------	0.9	35.3292	0.4527	2.52e-05	0.148484	0.0086402	3.43e-66	0.0086628	5.88e-66	46	FALSE	1
	cg01101873-chr10:101278324:SNP	cg01101873					chr1	3269478	chr10:101278324:SNP	rs10786556		-0.126323	0.008478	3.29e-50	27221	C	T	0.4688	0.0171	FALSE	35	+++++++++++++-+-++++++++?+++++++++++	32.9	50.6487	0.03302	0.0012475	-0.124494	0.010801	9.74e-31	0.0126295	1.49e-23	46	FALSE	1
	cg01101873-chr10:101293035:SNP	cg01101873					chr1	3269478	chr10:101293035:SNP	rs41290504		-0.118541	0.0088367	4.97e-41	24972	C	A	0.4788	0.0173	FALSE	33	+++++++?+?+++-+-++++++++?+++++++++++	29.3	45.2487	0.06039	0.0010822	-0.116839	0.0109573	1.51e-26	0.0124953	2.38e-21	46	FALSE	1
	cg01101873-chr10:101274365:SNP	cg01101873					chr1	3269478	chr10:101274365:SNP	rs7078219		0.148424	0.0085814	5.03e-67	27723	A	G	0.3919	0.0303	FALSE	36	++++++++++++++++-+++++++++++++++++++	2.3	35.8382	0.429	6.43e-05	0.148131	0.0087275	1.3e-64	0.0087869	5.19e-64	46	FALSE	1
	cg01101873-chr3:128330137:SNP	cg01101873					chr1	3269478	chr3:128330137:SNP	rs2253151		0.113633	0.008767	2.02e-38	27692	T	C	0.3668	0.0171	FALSE	36	++-+++++++++++++-++++++++-++++++++++	7.6	37.8677	0.3398	0.0002297	0.113123	0.0092605	2.56e-34	0.0094853	4.53e-33	46	TRUE	1
	cg01101873-chr10:101273546:SNP	cg01101873					chr1	3269478	chr10:101273546:SNP	rs61872688		0.148541	0.0085818	4.03e-67	27699	A	G	0.3917	0.0303	FALSE	36	++++++++++++++++-+++++++++++++++++++	1.9	35.6714	0.4367	5.15e-05	0.148303	0.0086994	3.64e-65	0.0087464	1.1e-64	46	FALSE	1
	cg01101873-chr10:101288347:SNP	cg01101873					chr1	3269478	chr10:101288347:SNP	rs7085798		-0.11802	0.008382	5.02e-45	27721	C	A	0.4794	0.0174	FALSE	36	+++++++++++++-++++++++++-+++++++++++	27.8	48.4937	0.06426	0.0009872	-0.115811	0.01026	1.51e-29	0.0116135	2.92e-24	46	FALSE	1
	cg01101873-chr10:101274565:SNP	cg01101873					chr1	3269478	chr10:101274565:SNP	rs7081858		0.148597	0.0085785	3.21e-67	27701	A	G	0.392	0.0303	FALSE	36	++++++++++++++++-+++++++++++++++++++	0.7	35.2603	0.4559	1.99e-05	0.148502	0.0086245	1.92e-66	0.0086423	2.94e-66	46	FALSE	1
	cg01101873-chr10:101287586:SNP	cg01101873					chr1	3269478	chr10:101287586:SNP	rs10883364		0.152971	0.0092959	7.63e-61	27717	G	A	0.2869	0.0356	FALSE	36	------------------------------------	13.3	40.3613	0.2452	0.0004823	0.152373	0.0102184	2.77e-50	0.0107199	3.37e-46	46	FALSE	1
	cg01101873-chr10:101288935:SNP	cg01101873					chr1	3269478	chr10:101288935:SNP	rs12412391		0.153034	0.0092946	6.56e-61	27722	G	A	0.287	0.0356	FALSE	36	------------------------------------	12.7	40.0881	0.2547	0.0004576	0.152456	0.0101742	9.27e-51	0.0106458	7.42e-47	46	FALSE	1
	cg01101873-chr10:101288099:SNP	cg01101873					chr1	3269478	chr10:101288099:SNP	rs11190139		0.152986	0.0092954	7.31e-61	27723	G	C	0.287	0.0356	FALSE	36	------------------------------------	13	40.2324	0.2497	0.0004707	0.152398	0.0101979	1.71e-50	0.010685	1.69e-46	46	FALSE	1
	cg01101873-chr10:101291593:SNP	cg01101873					chr1	3269478	chr10:101291593:SNP	rs11190140		-0.118782	0.0083816	1.37e-45	27723	T	C	0.4793	0.0176	FALSE	36	-------------+-+--------------------	28.9	49.2577	0.05556	0.001043	-0.116536	0.0103484	2.04e-29	0.011796	7.52e-24	46	FALSE	1
	cg01101873-chr10:101284570:SNP	cg01101873					chr1	3269478	chr10:101284570:SNP	rs4129133		-0.120043	0.008384	1.69e-46	27715	T	C	0.4792	0.0176	FALSE	36	-------------+----------------------	27.9	48.5739	0.0633	0.0009936	-0.117902	0.0102731	1.73e-30	0.0116356	5.91e-25	46	FALSE	1
	cg01101873-chr3:128356279:SNP	cg01101873					chr1	3269478	chr3:128356279:SNP	rs2811492		0.111193	0.0087833	9.9e-37	26860	A	G	0.3909	0.0191	FALSE	35	++-+++?+++++++++-++++++++-++++++++-+	19.9	42.4514	0.1515	0.0006806	0.110023	0.010158	2.45e-27	0.0109666	3.7e-24	46	FALSE	1
	cg01101873-chr10:101277772:SNP	cg01101873					chr1	3269478	chr10:101277772:SNP	rs7080361		0.115279	0.0085835	4.02e-41	27218	C	T	0.4369	0.0164	FALSE	35	-------------+-+--------?-----------	35.9	53.0682	0.01968	0.0014645	0.115749	0.0112116	5.49e-25	0.0133973	7.66e-18	46	FALSE	1
	cg01101873-chr10:101286495:SNP	cg01101873					chr1	3269478	chr10:101286495:SNP	rs6584282		-0.118996	0.0083837	1e-45	27716	A	G	0.479	0.0173	FALSE	36	-------------+----------------------	29.3	49.4866	0.05316	0.0010603	-0.116739	0.0103787	2.37e-29	0.0118538	1.03e-23	46	FALSE	1
	cg01101873-chr10:101287580:SNP	cg01101873					chr1	3269478	chr10:101287580:SNP	rs10883363		0.152993	0.0092961	7.39e-61	27715	T	C	0.287	0.0355	FALSE	36	++++++++++++++++++++++++++++++++++++	13.2	40.3021	0.2473	0.000477	0.152383	0.0102093	2.24e-50	0.0107044	2.44e-46	46	FALSE	1
	cg01101873-chr10:101289703:SNP	cg01101873					chr1	3269478	chr10:101289703:SNP	rs1548963		-0.119493	0.0083811	4.03e-46	27720	C	G	0.4789	0.0175	FALSE	36	-------------+----------------------	28.4	48.8626	0.05992	0.001014	-0.117293	0.0103029	5e-30	0.0117006	1.74e-24	46	FALSE	1
	cg01101873-chr3:128370811:SNP	cg01101873					chr1	3269478	chr3:128370811:SNP	rs2878370		0.108937	0.0087742	2.15e-35	26910	A	G	0.3897	0.0191	FALSE	35	++-++++?++++++++-++++++++-++++++++-+	21.4	43.2745	0.1323	0.0007453	0.107604	0.0102614	9.99e-26	0.0111677	1.76e-22	46	FALSE	1
	cg01101873-chr10:101286848:SNP	cg01101873					chr1	3269478	chr10:101286848:SNP	rs11190135		-0.119218	0.0083823	6.64e-46	27718	A	G	0.4787	0.0173	FALSE	36	-------------+----------------------	27.9	48.5736	0.0633	0.0009932	-0.117044	0.0102702	4.36e-30	0.0116331	1.21e-24	46	FALSE	1
	cg01101873-chr3:128346871:SNP	cg01101873					chr1	3269478	chr3:128346871:SNP	rs7636764		0.109854	0.0095674	1.62e-30	22531	T	C	0.3976	0.02	FALSE	30	++-+++??-?++++++-+++?++++-?++++?++-+	26.2	39.3177	0.09573	0.0009955	0.107533	0.0116727	3.19e-20	0.0129712	2.47e-17	46	FALSE	1
	cg01101873-chr10:101287764:SNP	cg01101873					chr1	3269478	chr10:101287764:SNP	rs10883365		-0.119486	0.0083793	3.9e-46	27724	G	A	0.479	0.0176	FALSE	36	+++++++++++++-++++++++++++++++++++++	28.8	49.1663	0.05655	0.0010358	-0.117254	0.0103358	7.9e-30	0.0117708	3.28e-24	46	FALSE	1
	cg01101873-chr3:128381086:SNP	cg01101873					chr1	3269478	chr3:128381086:SNP	rs6787559		0.110214	0.0087704	3.23e-36	26873	T	C	0.3886	0.0188	FALSE	34	++-+++++++++++++-++++?++?-++++++++-+	27	45.2	0.07658	0.00098	0.108513	0.0106784	2.93e-24	0.0120128	4.53e-20	46	FALSE	1
	cg01101873-chr3:128332679:SNP	cg01101873					chr1	3269478	chr3:128332679:SNP	rs2712404		0.113172	0.0087467	2.72e-38	27205	A	G	0.3897	0.0181	FALSE	35	++-+++++++++++++-+++++++?+++++++++++	4.5	35.5997	0.3929	0.0001276	0.112724	0.0090358	1.02e-35	0.0091583	4.45e-35	46	FALSE	1
	cg01101873-chr3:128359957:SNP	cg01101873					chr1	3269478	chr3:128359957:SNP	rs2811495		0.111933	0.0091427	1.83e-34	24735	A	G	0.392	0.019	FALSE	33	++-++++?+?++++++-++++++++-+++++?++-+	23	41.5813	0.1196	0.0008388	0.11032	0.0108376	2.45e-24	0.0118801	4.43e-21	46	FALSE	1
	cg01101873-chr3:128354334:SNP	cg01101873					chr1	3269478	chr3:128354334:SNP	rs11717399		0.110941	0.0087853	1.48e-36	26861	G	C	0.3908	0.0192	FALSE	35	--+---?---------+--------+--------+-	19.9	42.46	0.1513	0.0006816	0.109814	0.0101615	3.19e-27	0.0109713	4.89e-24	46	FALSE	1
	cg01101873-chr3:128340896:SNP	cg01101873					chr1	3269478	chr3:128340896:SNP	rs2712419		0.111023	0.0087865	1.34e-36	26847	T	C	0.3912	0.019	FALSE	35	++-+++?+++++++++-++++++++-++++++++-+	20.3	42.6521	0.1467	0.0006973	0.109863	0.0101907	4.25e-27	0.0110224	7.31e-24	46	FALSE	1
	cg01101873-chr3:128372003:SNP	cg01101873					chr1	3269478	chr3:128372003:SNP	rs4481171		0.108104	0.0090736	1e-32	25111	C	T	0.3929	0.0188	FALSE	33	--+----?-?------+----?---+--------+-	27.5	44.116	0.07521	0.0010441	0.105852	0.011104	1.53e-21	0.0125091	5.52e-18	46	FALSE	1
	cg01101873-chr3:128381660:SNP	cg01101873					chr1	3269478	chr3:128381660:SNP	rs6801890		0.110206	0.0087727	3.4e-36	26872	A	G	0.3888	0.019	FALSE	34	++-+++++++++++++-++++?++?-++++++++-+	26.3	44.7853	0.08274	0.0009472	0.108525	0.0106266	1.74e-24	0.0119057	2.11e-20	46	FALSE	1
	cg01101873-chr3:128366256:SNP	cg01101873					chr1	3269478	chr3:128366256:SNP	rs2811500		0.109403	0.0086507	1.17e-36	27712	C	T	0.3904	0.0187	FALSE	36	--+-------------+--------+--------+-	19	43.1902	0.1611	0.0006388	0.108202	0.0099247	1.12e-27	0.010675	1.2e-24	46	FALSE	1
	cg01101873-chr10:101275149:SNP	cg01101873					chr1	3269478	chr10:101275149:SNP	rs11190128		0.154674	0.0092092	2.63e-63	27704	C	A	0.2968	0.0354	FALSE	36	------------------------------------	16	41.6615	0.2035	0.0005882	0.154113	0.0103232	2.14e-50	0.010962	3.29e-45	46	FALSE	1
	cg01101873-chr3:128361555:SNP	cg01101873					chr1	3269478	chr3:128361555:SNP	rs7650156		0.109354	0.0086518	1.28e-36	27702	T	A	0.3904	0.0187	FALSE	36	--+-------------+--------+--------+-	18.9	43.1782	0.1614	0.000638	0.108182	0.009924	1.14e-27	0.0106734	1.24e-24	46	FALSE	1
	cg01101873-chr3:128329920:SNP	cg01101873					chr1	3269478	chr3:128329920:SNP	rs2253144		0.115027	0.0090116	2.59e-37	25567	A	G	0.3917	0.0186	FALSE	33	++-+++??++++++++-+++++++?+++++++++++	6.3	34.1517	0.3646	0.0001829	0.114423	0.0094388	8.02e-34	0.0096175	5.75e-33	46	FALSE	1
	cg01101873-chr10:101284637:SNP	cg01101873					chr1	3269478	chr10:101284637:SNP	rs4129132		-0.119994	0.0083839	1.83e-46	27715	T	G	0.4791	0.0176	FALSE	36	-------------+----------------------	28	48.612	0.06284	0.0009964	-0.117848	0.0102775	1.94e-30	0.0116445	6.71e-25	46	FALSE	1
	cg01101873-chr10:101288861:SNP	cg01101873					chr1	3269478	chr10:101288861:SNP	rs60386053		0.153427	0.0092954	0	27708	A	G	0.287	0.0356	FALSE	36	++++++++++++++++++++++++++++++++++++	12.5	39.9833	0.2584	0.0004483	0.152825	0.0101582	3.75e-51	0.0106188	2.56e-47	46	TRUE	1
	cg01101873-chr3:128372657:SNP	cg01101873					chr1	3269478	chr3:128372657:SNP	rs4481172		0.110271	0.0090682	5.06e-34	25115	C	A	0.3927	0.0188	FALSE	33	--+----?-?------+----?---+--------+-	24.3	42.2812	0.1056	0.0008849	0.108377	0.0108322	1.45e-23	0.0119817	3.47e-20	46	FALSE	1
	cg01101873-chr3:128358633:SNP	cg01101873					chr1	3269478	chr3:128358633:SNP	rs6439135		0.10937	0.0086498	1.2e-36	27718	G	A	0.3904	0.0188	FALSE	36	--+-------------+--------+--------+-	18.3	42.8594	0.1697	0.0006128	0.10826	0.0098768	5.88e-28	0.0105921	5.4e-25	46	FALSE	1
	cg01101873-chr3:128364609:SNP	cg01101873					chr1	3269478	chr3:128364609:SNP	rs2002849		0.109367	0.0086497	1.21e-36	27712	G	A	0.3905	0.0188	FALSE	36	--+-------------+--------+--------+-	19	43.1995	0.1609	0.0006394	0.108182	0.0099248	1.15e-27	0.0106761	1.26e-24	46	FALSE	1
	cg01101873-chr10:101290301:SNP	cg01101873					chr1	3269478	chr10:101290301:SNP	rs6584283		-0.120268	0.0086246	3.38e-44	26408	T	C	0.4659	0.016	FALSE	34	-------?-----+----------?-----------	25.6	44.3381	0.08983	0.0008806	-0.118968	0.0103879	2.28e-30	0.0115878	3.09e-25	46	FALSE	1
	cg01101873-chr3:128361936:SNP	cg01101873					chr1	3269478	chr3:128361936:SNP	rs9841041		0.109253	0.0086506	1.45e-36	27706	A	G	0.3906	0.0188	FALSE	36	++-+++++++++++++-++++++++-++++++++-+	19.3	43.3501	0.1571	0.0006512	0.108051	0.009946	1.72e-27	0.0107144	2.05e-24	46	FALSE	1
	cg01101873-chr3:128338600:SNP	cg01101873					chr1	3269478	chr3:128338600:SNP	rs2712381		0.111375	0.0087846	7.79e-37	26848	A	C	0.3919	0.0193	FALSE	35	++-+++?+++++++++-++++++++-++++++++-+	19.4	42.1871	0.1581	0.0006596	0.11026	0.0101224	1.25e-27	0.0109	1.65e-24	46	FALSE	1
	cg01101873-chr10:101276256:SNP	cg01101873					chr1	3269478	chr10:101276256:SNP	rs12412214		0.155281	0.009212	9.42e-64	27693	A	G	0.2966	0.0355	FALSE	36	++++++++++++++++++++++++++++++++++++	17.2	42.2803	0.1855	0.0006433	0.154742	0.0104181	6.64e-50	0.0111282	2.98e-44	46	FALSE	1
	cg01101873-chr3:128364895:SNP	cg01101873					chr1	3269478	chr3:128364895:SNP	rs2712409		0.109284	0.0087896	1.72e-35	26897	G	C	0.3896	0.0189	FALSE	35	--+----?--------+--------+--------+-	23.4	44.4034	0.1092	0.0008389	0.108004	0.0104327	4.08e-25	0.011479	1.73e-21	46	FALSE	1
	cg01101873-chr10:101285116:SNP	cg01101873					chr1	3269478	chr10:101285116:SNP	rs12413565		0.153226	0.0093005	5.54e-61	27700	A	C	0.2868	0.0357	FALSE	36	++++++++++++++++++++++++++++++++++++	12.9	40.2039	0.2507	0.0004686	0.152586	0.0101987	1.31e-50	0.0106833	1.19e-46	46	FALSE	1
	cg01101873-chr3:128353079:SNP	cg01101873					chr1	3269478	chr3:128353079:SNP	rs7627549		0.110868	0.0087885	1.74e-36	26811	G	A	0.3917	0.0191	FALSE	35	--+---?---------+--------+--------+-	22.1	43.6584	0.1241	0.0007788	0.109678	0.0103319	2.52e-26	0.0112851	8.85e-23	46	FALSE	1
	cg01101873-chr10:101293318:SNP	cg01101873					chr1	3269478	chr10:101293318:SNP	rs7908704		-0.120408	0.0084532	4.88e-46	27217	G	A	0.48	0.0176	FALSE	35	+++++++++++++-+-++++++++?+++++++++++	27.4	46.8256	0.07042	0.0009554	-0.118669	0.0103128	1.22e-30	0.011642	4.52e-25	46	FALSE	1
	cg01101873-chr3:128323424:SNP	cg01101873					chr1	3269478	chr3:128323424:SNP	rs6782228		0.106917	0.0097945	9.67e-28	25801	C	G	0.2777	0.0216	FALSE	33	+++++++?++++++++++++++++?-?++++-++++	25.2	42.7746	0.0966	0.0010815	0.105948	0.011788	2.52e-19	0.0130924	3.18e-16	46	FALSE	1
	cg01101873-chr10:101293468:SNP	cg01101873					chr1	3269478	chr10:101293468:SNP	rs7911680		-0.117844	0.0083976	9.79e-45	27653	A	C	0.4822	0.018	FALSE	36	-------------+-+--------------------	29.9	49.9368	0.0487	0.0010969	-0.115449	0.0104465	2.16e-28	0.0119814	7.91e-23	46	FALSE	1
	cg01101873-chr10:101275206:SNP	cg01101873					chr1	3269478	chr10:101275206:SNP	rs11190130		0.148559	0.0085801	3.66e-67	27701	T	C	0.3917	0.0304	FALSE	36	++++++++++++++++-+++++++++++++++++++	1.2	35.4073	0.449	3.12e-05	0.148414	0.0086518	5.85e-66	0.0086799	1.14e-65	46	FALSE	1
	cg01101873-chr3:128361417:SNP	cg01101873					chr1	3269478	chr3:128361417:SNP	rs7647837		0.109338	0.0086517	1.31e-36	27695	T	C	0.3907	0.0187	FALSE	36	++-+++++++++++++-++++++++-++++++++-+	18.5	42.9665	0.1669	0.0006215	0.108166	0.0098944	8.1e-28	0.0106209	7.46e-25	46	FALSE	1
	cg01101873-chr10:101295863:SNP	cg01101873					chr1	3269478	chr10:101295863:SNP	rs888208		0.149888	0.0094347	7.81e-57	26920	G	A	0.2871	0.0366	FALSE	35	-------?----------------------------	13	39.0972	0.2515	0.0004731	0.149168	0.0103581	5.1e-47	0.0108491	2.05e-43	46	FALSE	1
	cg01101873-chr10:101288111:INDEL	cg01101873					chr1	3269478	chr10:101288111:INDEL	chr10.101288111		0.151867	0.0099232	7.16e-53	24250	D	I	0.2881	0.0378	FALSE	32	+++++++?+?++++++++++++++?++++++?++++	10.3	34.5735	0.301	0.0003686	0.151301	0.010696	1.99e-45	0.0110671	7.45e-43	46	FALSE	1
	cg01101873-chr3:128337371:SNP	cg01101873					chr1	3269478	chr3:128337371:SNP	rs2811489		0.109839	0.0086496	6.02e-37	27709	C	T	0.3917	0.0191	FALSE	36	--+-------------+--------+--------+-	19.3	43.3749	0.1565	0.000653	0.1087	0.0099483	8.61e-28	0.0107194	1.22e-24	46	FALSE	1
	cg01101873-chr3:128346861:SNP	cg01101873					chr1	3269478	chr3:128346861:SNP	rs7646974		0.112109	0.0092909	1.59e-33	23861	A	G	0.3966	0.0198	FALSE	32	++-+++??+?++++++-++++++++-+++++?++-+	26.8	42.3692	0.08378	0.0010301	0.110236	0.0113549	2.78e-22	0.0126983	1.06e-18	46	FALSE	1
	cg01101873-chr10:101277239:SNP	cg01101873					chr1	3269478	chr10:101277239:SNP	rs7092009		-0.125514	0.0084796	1.42e-49	27231	A	G	0.4679	0.0168	FALSE	35	-------------+-+--------?-----------	32.2	50.1584	0.03654	0.0012112	-0.123765	0.0107455	1.07e-30	0.0125094	1.09e-23	46	FALSE	1
	cg01101873-chr3:128350317:SNP	cg01101873					chr1	3269478	chr3:128350317:SNP	rs9844071		0.109762	0.0091615	4.48e-33	24593	G	A	0.3955	0.02	FALSE	33	--+---??+?------+--------+--------+-	30.8	46.2197	0.04974	0.0012504	0.107264	0.0115354	1.42e-20	0.0132326	1.09e-16	46	FALSE	1
	cg01101873-chr10:101273857:SNP	cg01101873					chr1	3269478	chr10:101273857:SNP	rs10883358		0.14864	0.0085802	3.13e-67	27705	T	C	0.3918	0.0303	FALSE	36	++++++++++++++++-+++++++++++++++++++	1.7	35.6156	0.4393	4.72e-05	0.148422	0.0086881	1.98e-65	0.0087312	5.45e-65	46	FALSE	1
	cg01101873-chr3:128325979:INDEL	cg01101873					chr1	3269478	chr3:128325979:INDEL	chr3.128325979		0.113942	0.0093293	2.64e-34	23387	I	D	0.4165	0.0188	FALSE	31	--+---??-?-----++-------?+-----?----	30.6	43.2544	0.05564	0.0012124	0.11155	0.0117485	2.21e-21	0.0134512	2.44e-17	46	FALSE	1
	cg01101873-chr10:101293341:SNP	cg01101873					chr1	3269478	chr10:101293341:SNP	rs7893840		-0.120408	0.0084532	4.88e-46	27217	T	C	0.48	0.0176	FALSE	35	-------------+-+--------?-----------	27.4	46.8256	0.07042	0.0009554	-0.118669	0.0103128	1.22e-30	0.011642	4.52e-25	46	FALSE	1
	cg01101873-chr10:101271789:SNP	cg01101873					chr1	3269478	chr10:101271789:SNP	rs11190126		0.149381	0.008654	9.18e-67	27188	C	A	0.3933	0.0302	FALSE	35	----------------+-------?-----------	0	32.7278	0.5299	0	0.149381	0.008654	9.18e-67	0.008654	9.18e-67	46	FALSE	1
	cg01101873-chr10:101274033:SNP	cg01101873					chr1	3269478	chr10:101274033:SNP	rs10883359		0.154757	0.0092098	2.3e-63	27708	G	A	0.2969	0.0354	FALSE	36	------------------------------------	16.2	41.7635	0.2004	0.0005973	0.154207	0.0103393	2.65e-50	0.0109895	4.89e-45	46	FALSE	1
	cg01101873-chr10:101282200:SNP	cg01101873					chr1	3269478	chr10:101282200:SNP	rs11190134		0.151032	0.0086543	3.35e-68	27228	A	G	0.3924	0.0299	FALSE	35	++++++++++++++++-+++++++?+++++++++++	0	33.0682	0.5131	0	0.151032	0.0086543	3.35e-68	0.0086543	3.35e-68	46	FALSE	1
	cg01101873-chr3:128354176:SNP	cg01101873					chr1	3269478	chr3:128354176:SNP	rs11717358		0.110927	0.0087854	1.51e-36	26860	G	C	0.3908	0.0192	FALSE	35	--+---?---------+--------+--------+-	19.9	42.4557	0.1514	0.0006813	0.109797	0.0101611	3.24e-27	0.0109703	4.91e-24	46	FALSE	1
	cg01101873-chr10:101278725:SNP	cg01101873					chr1	3269478	chr10:101278725:SNP	rs11190133		0.154584	0.0092121	3.38e-63	27720	T	C	0.2965	0.0354	FALSE	36	++++++++++++++++++++++++++++++++++++	14.9	41.1514	0.2192	0.0005435	0.153976	0.0102487	5.12e-51	0.0108311	3.26e-46	46	FALSE	1
	cg01101873-chr10:101295653:INDEL	cg01101873					chr1	3269478	chr10:101295653:INDEL	chr10.101295653		0.150443	0.0099184	5.75e-52	24250	I	D	0.2884	0.0382	FALSE	32	-------?-?--------------?------?----	9.9	34.3943	0.3084	0.0003498	0.149804	0.0106539	6.61e-45	0.0110044	1.51e-42	46	FALSE	1
	cg05457628-chr5:179086833:SNP	cg05457628	TSS200;TSS200	NM_001040452.3_2;NM_001040451.3_2	RUFY1;RUFY1	Island	chr5	178986728	chr5:179086833:SNP	rs28833246	100105	0.163319	0.0161491	4.83e-24	19097	A	G	0.1146	0.0116	TRUE	27	++++++??+++-?++-++?+++?+?+??+++++?++	32.7	38.6154	0.05303	0.0034665	0.167188	0.0205623	4.27e-16	0.0239847	9.81e-12	214	FALSE	1
	cg05457628-chr5:178893079:SNP	cg05457628	TSS200;TSS200	NM_001040452.3_2;NM_001040451.3_2	RUFY1;RUFY1	Island	chr5	178986728	chr5:178893079:SNP	rs6860498	93649	0.130869	0.0126445	4.19e-25	26603	C	A	0.1344	0.0138	TRUE	34	----+------+-+-+-------+?-?---------	10.4	36.84	0.2957	0.0006428	0.12893	0.0136716	4.08e-21	0.0141158	1.84e-20	214	FALSE	1
	cg05457628-chr5:178983987:SNP	cg05457628	TSS200;TSS200	NM_001040452.3_2;NM_001040451.3_2	RUFY1;RUFY1	Island	chr5	178986728	chr5:178983987:SNP	rs73330342	2741	0.628068	0.014387	0	27722	G	A	0.0912	0.0086	TRUE	36	------------------------------------	31.2	50.8994	0.04023	0.0034259	0.628967	0.0181095	0.00000000000000000000000000000000000000000000000000000000000000000000000000000000000000000000000000000000000000000000000000000000000000000000000000000000000000000000000000000000000000000000000000000000000000000000000000000000000000000000000000000000000000000000000265	0.0209226	5.61e-198	214	FALSE	1
	cg05457628-chr5:178893144:SNP	cg05457628	TSS200;TSS200	NM_001040452.3_2;NM_001040451.3_2	RUFY1;RUFY1	Island	chr5	178986728	chr5:178893144:SNP	rs28606973	93584	-0.261017	0.0120594	6.88e-104	23955	A	C	0.1733	0.0299	TRUE	31	-------?-?--------?-----?-?---------	19.8	37.4077	0.1656	0.0011293	-0.259808	0.0139194	9.51e-78	0.0150371	1.71e-67	214	FALSE	1
	cg05457628-chr5:178960064:SNP	cg05457628	TSS200;TSS200	NM_001040452.3_2;NM_001040451.3_2	RUFY1;RUFY1	Island	chr5	178986728	chr5:178960064:SNP	rs12654319	26664	0.711396	0.0219494	1.94e-230	22534	G	A	0.0463	0.0067	TRUE	29	-----???-------------?--?--?--?-----	32	41.1987	0.05149	0.0066946	0.711242	0.0279683	1.17e-142	0.032296	1.58e-107	214	FALSE	1
	cg05457628-chr5:179056160:SNP	cg05457628	TSS200;TSS200	NM_001040452.3_2;NM_001040451.3_2	RUFY1;RUFY1	Island	chr5	178986728	chr5:179056160:SNP	rs113817606	69432	-0.450923	0.0153339	4.48e-190	22139	C	T	0.1057	0.0125	TRUE	28	+++?+++?+?++++++++++??++?+?++++?++++	0	24.4721	0.604	0	-0.450923	0.0153339	4.48e-190	0.0153339	4.48e-190	214	FALSE	1
	cg05457628-chr5:178978012:SNP	cg05457628	TSS200;TSS200	NM_001040452.3_2;NM_001040451.3_2	RUFY1;RUFY1	Island	chr5	178986728	chr5:178978012:SNP	rs116199671	8716	-0.504842	0.0098058	0	20606	T	C	0.3434	0.0163	TRUE	26	---?--??-?----------??--?-??---?----	49	49.0053	0.002821	0.0024547	-0.503564	0.0146715	0.00000000000000000000000000000000000000000000000000000000000000000000000000000000000000000000000000000000000000000000000000000000000000000000000000000000000000000000000000000000000000000000000000000000000000000000000000000000000000000000000000000000000000000361	0.0192214	4.87e-152	214	FALSE	1
	cg05457628-chr5:178801552:SNP	cg05457628	TSS200;TSS200	NM_001040452.3_2;NM_001040451.3_2	RUFY1;RUFY1	Island	chr5	178986728	chr5:178801552:SNP	rs72494560	185176	0.203661	0.0119305	2.46e-65	17253	G	A	0.2885	0.0338	TRUE	22	---?--??-?--?-----????--?-??---?-?+-	20.1	26.2895	0.1956	0.0008126	0.202049	0.0139986	3.18e-47	0.0149356	2.45e-42	214	FALSE	1
	cg05457628-chr5:179069181:SNP	cg05457628	TSS200;TSS200	NM_001040452.3_2;NM_001040451.3_2	RUFY1;RUFY1	Island	chr5	178986728	chr5:179069181:SNP	rs373341438	82453	-0.271047	0.0177334	9.7e-53	14119	C	G	0.1381	0.0299	TRUE	18	?--??-????--?--?----??--?-???--???--	25.4	22.7761	0.1567	0.0019952	-0.268617	0.0217212	3.96e-35	0.0237586	3.8e-30	214	FALSE	1
	cg05457628-chr5:178961710:SNP	cg05457628	TSS200;TSS200	NM_001040452.3_2;NM_001040451.3_2	RUFY1;RUFY1	Island	chr5	178986728	chr5:178961710:SNP	rs6876210	25018	0.47415	0.0101921	0	27750	C	T	0.202	0.0162	TRUE	36	------------------------------------	34.3	53.2743	0.02463	0.0019767	0.47497	0.0131162	0.0000000000000000000000000000000000000000000000000000000000000000000000000000000000000000000000000000000000000000000000000000000000000000000000000000000000000000000000000000000000000000000000000000000000000000000000000000000000000000000000000000000000000000000000000000000000000000000000387	0.0155136	3.74e-205	214	FALSE	1
	cg05457628-chr5:178970654:INDEL	cg05457628	TSS200;TSS200	NM_001040452.3_2;NM_001040451.3_2	RUFY1;RUFY1	Island	chr5	178986728	chr5:178970654:INDEL	chr5.178970654	16074	0.729116	0.0599709	5.21e-34	5824	I	D	0.0217	0.0018	TRUE	7	?--??????????-???-????-???????????+-	43.5	10.616	0.101	0.0245951	0.736624	0.0959393	1.62e-14	0.106109	6.36e-12	214	FALSE	1
	cg05457628-chr5:178902028:SNP	cg05457628	TSS200;TSS200	NM_001040452.3_2;NM_001040451.3_2	RUFY1;RUFY1	Island	chr5	178986728	chr5:178902028:SNP	rs35431667	84700	-0.157398	0.0102016	0	25412	G	T	0.2477	0.0171	TRUE	32	+++++++?++++++++++?+++++?+?+++++++++	50.1	62.1627	0.0007448	0.0033987	-0.156778	0.015286	1.11e-24	0.0204567	1.42e-14	214	TRUE	1
	cg05457628-chr5:178901811:SNP	cg05457628	TSS200;TSS200	NM_001040452.3_2;NM_001040451.3_2	RUFY1;RUFY1	Island	chr5	178986728	chr5:178901811:SNP	rs34648446	84917	-0.157285	0.0102108	1.54e-53	25407	A	G	0.2471	0.0171	TRUE	32	-------?----------?-----?-?---------	50.6	62.786	0.0006257	0.0034731	-0.156421	0.0153774	2.64e-24	0.0206805	2.84e-14	214	FALSE	1
	cg05457628-chr5:179100279:SNP	cg05457628	TSS200;TSS200	NM_001040452.3_2;NM_001040451.3_2	RUFY1;RUFY1	Island	chr5	178986728	chr5:179100279:SNP	rs11746066	113551	0.288907	0.0115495	4.23e-138	15142	A	G	0.3851	0.0158	TRUE	19	+++?+?????++?+??+++???+??+??+++++?++	0	16.1481	0.5822	0	0.288907	0.0115495	4.23e-138	0.0115495	4.23e-138	214	FALSE	1
	cg05457628-chr5:179086931:SNP	cg05457628	TSS200;TSS200	NM_001040452.3_2;NM_001040451.3_2	RUFY1;RUFY1	Island	chr5	178986728	chr5:179086931:SNP	rs10479548	100203	0.162842	0.0161388	6.11e-24	19095	C	A	0.1148	0.0116	TRUE	27	------??---+?--+--?---?-?-??-----?--	33	38.813	0.0508	0.0035162	0.166557	0.0206061	6.33e-16	0.0240921	1.39e-11	214	FALSE	1
	cg05457628-chr5:179031037:SNP	cg05457628	TSS200;TSS200	NM_001040452.3_2;NM_001040451.3_2	RUFY1;RUFY1	Island	chr5	178986728	chr5:179031037:SNP	rs57785769	44309	-0.274778	0.0123158	2.89e-110	27132	G	A	0.1433	0.0223	TRUE	35	++++++++++++++++++++++++++?+++++++++	26.1	45.9888	0.08225	0.0018968	-0.271448	0.0148902	2.98e-74	0.0166584	4e-61	214	FALSE	1
	cg05457628-chr5:178909892:SNP	cg05457628	TSS200;TSS200	NM_001040452.3_2;NM_001040451.3_2	RUFY1;RUFY1	Island	chr5	178986728	chr5:178909892:SNP	rs6887834	76836	-0.158623	0.0105077	1.72e-51	23955	A	C	0.2474	0.018	TRUE	31	-------?-?--------?-----?-?---------	51.4	61.7756	0.0005583	0.0036857	-0.157215	0.0159805	7.73e-23	0.0216373	2.28e-13	214	FALSE	1
	cg05457628-chr5:178991794:SNP	cg05457628	TSS200;TSS200	NM_001040452.3_2;NM_001040451.3_2	RUFY1;RUFY1	Island	chr5	178986728	chr5:178991794:SNP	rs4700810	5066	0.51749	0.0081393	0	27749	A	G	0.3848	0.0224	TRUE	36	++++++++++++++++++++++++++++++++++++	63.4	95.5668	1.587e-07	0.0041806	0.51454	0.0141417	0.000000000000000000000000000000000000000000000000000000000000000000000000000000000000000000000000000000000000000000000000000000000000000000000000000000000000000000000000000000000000000000000000000000000000000000000000000000000000000000000000000000000000000000000000000000000000000000000000075	0.0222243	6.31e-120	214	FALSE	1
	cg05457628-chr5:178965586:SNP	cg05457628	TSS200;TSS200	NM_001040452.3_2;NM_001040451.3_2	RUFY1;RUFY1	Island	chr5	178986728	chr5:178965586:SNP	rs28865714	21142	0.3284	0.0132444	1e-135	25789	T	C	0.1254	0.0097	TRUE	33	+++++++?++++++++++++++++?++?++++++++	60	80.0399	5.395e-06	0.0088061	0.329946	0.0220931	1.97e-50	0.0331274	3.65e-23	214	FALSE	1
	cg05457628-chr5:178981841:SNP	cg05457628	TSS200;TSS200	NM_001040452.3_2;NM_001040451.3_2	RUFY1;RUFY1	Island	chr5	178986728	chr5:178981841:SNP	rs12658811	4887	0.741545	0.0084985	0	24998	T	C	0.3047	0.0202	TRUE	33	+++++++?+?++++++++++++++?+++++++++++	69	103.12	2.093e-09	0.0053735	0.737073	0.0160489	0	0.0273865	1.84e-161	214	FALSE	1
	cg05457628-chr5:178904519:SNP	cg05457628	TSS200;TSS200	NM_001040452.3_2;NM_001040451.3_2	RUFY1;RUFY1	Island	chr5	178986728	chr5:178904519:SNP	rs6897833	82209	-0.163126	0.0099672	3.33e-60	26701	C	T	0.2466	0.019	TRUE	34	++++++++++++++++++?+++++++?+++++++++	55.5	74.1608	5.313e-05	0.0042726	-0.165269	0.0157952	1.28e-25	0.0223993	3.27e-13	214	FALSE	1
	cg05457628-chr5:178878708:SNP	cg05457628	TSS200;TSS200	NM_001040452.3_2;NM_001040451.3_2	RUFY1;RUFY1	Island	chr5	178986728	chr5:178878708:SNP	rs1814610	108020	0.166508	0.0130015	1.5e-37	26526	A	G	0.1266	0.0138	TRUE	34	++++-++++++-+++-++++?++-?++++++++++-	20.6	41.5548	0.1459	0.0015152	0.163474	0.0151755	4.66e-27	0.016372	2.69e-24	214	FALSE	1
	cg05457628-chr5:179077359:SNP	cg05457628	TSS200;TSS200	NM_001040452.3_2;NM_001040451.3_2	RUFY1;RUFY1	Island	chr5	178986728	chr5:179077359:SNP	chr5.179077359	90631	0.704333	0.0256018	1.29e-166	6930	T	G	0.1016	0.0199	TRUE	9	?++????????+?+???+????+??+????????++	0	4.11214	0.8469	0	0.704333	0.0256018	1.29e-166	0.0256018	1.29e-166	214	FALSE	1
	cg05457628-chr5:178999658:SNP	cg05457628	TSS200;TSS200	NM_001040452.3_2;NM_001040451.3_2	RUFY1;RUFY1	Island	chr5	178986728	chr5:178999658:SNP	rs7447429	12930	0.517974	0.0081409	0	27731	G	A	0.3848	0.0225	TRUE	36	------------------------------------	63.7	96.3873	1.208e-07	0.0042388	0.514955	0.0142026	0.0000000000000000000000000000000000000000000000000000000000000000000000000000000000000000000000000000000000000000000000000000000000000000000000000000000000000000000000000000000000000000000000000000000000000000000000000000000000000000000000000000000000000000000000000000000000000000000000075	0.0224195	4.25e-118	214	FALSE	1
	cg05457628-chr5:178966392:INDEL	cg05457628	TSS200;TSS200	NM_001040452.3_2;NM_001040451.3_2	RUFY1;RUFY1	Island	chr5	178986728	chr5:178966392:INDEL	chr5.178966392	20336	0.732505	0.0097789	0	16104	D	I	0.4214	0.0244	TRUE	20	?++??++???++?++?++++??++?+???++??+++	62.1	50.1592	0.0001242	0.0032254	0.727595	0.017066	0	0.0258159	4.22e-177	214	FALSE	1
	cg05457628-chr5:178941092:SNP	cg05457628	TSS200;TSS200	NM_001040452.3_2;NM_001040451.3_2	RUFY1;RUFY1	Island	chr5	178986728	chr5:178941092:SNP	rs185669181	45636	-0.394024	0.02546	5.03e-54	23047	A	C	0.0361	0.0072	TRUE	28	---?-?-?-------------?--?-??---?----	0	23.3157	0.6679	0	-0.394024	0.02546	5.03e-54	0.02546	5.03e-54	214	FALSE	1
	cg05457628-chr5:179108945:INDEL	cg05457628	TSS200;TSS200	NM_001040452.3_2;NM_001040451.3_2	RUFY1;RUFY1	Island	chr5	178986728	chr5:179108945:INDEL	chr5.179108945	122217	0.230587	0.0113847	3.27e-91	15595	D	I	0.4068	0.0196	TRUE	19	?++??++???++?++?++++??+??+???++??+++	29.6	25.5775	0.1098	0.0010697	0.232548	0.0143608	5.63e-59	0.0161773	4.25e-46	214	FALSE	1
	cg05457628-chr5:179059572:SNP	cg05457628	TSS200;TSS200	NM_001040452.3_2;NM_001040451.3_2	RUFY1;RUFY1	Island	chr5	178986728	chr5:179059572:SNP	rs28571858	72844	-0.278563	0.0253892	5.23e-28	16317	G	C	0.0591	0.0278	TRUE	20	+++??+????++?++?+++???++?+??+++?+?-+	0	16.6808	0.6115	0	-0.278563	0.0253892	5.23e-28	0.0253892	5.23e-28	214	FALSE	1
	cg05457628-chr5:178887125:SNP	cg05457628	TSS200;TSS200	NM_001040452.3_2;NM_001040451.3_2	RUFY1;RUFY1	Island	chr5	178986728	chr5:178887125:SNP	rs4701157	99603	0.165565	0.0127601	1.69e-38	27737	A	G	0.1258	0.0142	TRUE	36	++++-++++++-+++-++++++++-++++++++++-	20.3	43.9421	0.1429	0.001521	0.161548	0.0148476	1.43e-27	0.0160201	4.91e-25	214	FALSE	1
	cg05457628-chr5:178988229:INDEL	cg05457628	TSS200;TSS200	NM_001040452.3_2;NM_001040451.3_2	RUFY1;RUFY1	Island	chr5	178986728	chr5:178988229:INDEL	chr5.178988229	1501	-0.499735	0.0176531	2.71e-176	8433	I	D	0.43	0.2583	TRUE	12	+++???????++?+???+???????+??+???+?++	69	35.479	0.0002065	0.0088386	-0.485411	0.0346661	1.51e-44	0.0569378	1.68e-18	214	FALSE	1
	cg05457628-chr5:179037468:INDEL	cg05457628	TSS200;TSS200	NM_001040452.3_2;NM_001040451.3_2	RUFY1;RUFY1	Island	chr5	178986728	chr5:179037468:INDEL	chr5.179037468	50740	0.609579	0.0353276	1.03e-66	7162	D	I	0.0577	0.0073	TRUE	10	+??++???+???+??+????+?????+?+???+???	59.5	22.2452	0.008134	0.0188538	0.627267	0.0572966	6.81e-28	0.0873188	2.93e-12	214	FALSE	1
	cg05457628-chr5:178968049:SNP	cg05457628	TSS200;TSS200	NM_001040452.3_2;NM_001040451.3_2	RUFY1;RUFY1	Island	chr5	178986728	chr5:178968049:SNP	rs7735050	18679	0.586235	0.0198665	2.23e-191	25167	T	C	0.0528	0.0101	TRUE	32	+++++++?++++++++++++++++?+??++++++++	15.5	36.6739	0.2223	0.0023509	0.585558	0.0223187	1.03e-151	0.0235027	2.52e-137	214	FALSE	1
	cg05457628-chr5:178986436:SNP	cg05457628	TSS200;TSS200	NM_001040452.3_2;NM_001040451.3_2	RUFY1;RUFY1	Island	chr5	178986728	chr5:178986436:SNP	rs7702303	292	0.967387	0.0066914	0	27257	A	G	0.3643	0.019	TRUE	35	++++++++++++++++++++++++?+++++++++++	83.6	207.779	7.901e-27	0.0081089	0.96083	0.0172362	0	0.040892	9.97e-124	214	FALSE	1
	cg05457628-chr5:179422047:SNP	cg05457628	TSS200;TSS200	NM_001040452.3_2;NM_001040451.3_2	RUFY1;RUFY1	Island	chr5	178986728	chr5:179422047:SNP	rs185076	435319	-0.123768	0.0087249	1.13e-45	27219	C	G	0.3946	0.0258	TRUE	35	---------------++-------?---------+-	17.4	41.1847	0.1851	0.00057	-0.123508	0.0098808	7.48e-36	0.0105686	1.12e-31	214	FALSE	1
	cg05457628-chr5:179110574:SNP	cg05457628	TSS200;TSS200	NM_001040452.3_2;NM_001040451.3_2	RUFY1;RUFY1	Island	chr5	178986728	chr5:179110574:SNP	rs67484565	123846	0.220026	0.0092543	5.99e-125	23941	T	G	0.3826	0.0142	TRUE	30	+++++++?++++++++++++?++??+??++++++++	28	40.2808	0.07945	0.0010163	0.220562	0.011421	4.26e-83	0.0128542	1.11e-65	214	FALSE	1
	cg05457628-chr5:178969685:SNP	cg05457628	TSS200;TSS200	NM_001040452.3_2;NM_001040451.3_2	RUFY1;RUFY1	Island	chr5	178986728	chr5:178969685:SNP	rs141752458	17043	0.605875	0.0198765	4.51e-204	25946	A	G	0.0507	0.0086	TRUE	33	++++++++++++++++++++++++?+??++++++++	8.6	35.0074	0.3272	0.0012455	0.605561	0.021209	2.65e-179	0.0217444	7.4e-171	214	FALSE	1
	cg05457628-chr5:178974703:SNP	cg05457628	TSS200;TSS200	NM_001040452.3_2;NM_001040451.3_2	RUFY1;RUFY1	Island	chr5	178986728	chr5:178974703:SNP	rs6875482	12025	0.753492	0.0075995	0	26423	G	A	0.4084	0.0187	TRUE	34	-------?----------------?-----------	73.1	122.874	2.799e-12	0.0054176	0.749181	0.0153872	0	0.0282964	3.17e-156	214	FALSE	1
	cg05457628-chr5:178950207:SNP	cg05457628	TSS200;TSS200	NM_001040452.3_2;NM_001040451.3_2	RUFY1;RUFY1	Island	chr5	178986728	chr5:178950207:SNP	rs11747829	36521	0.482145	0.0091549	0	21656	A	G	0.4577	0.0272	TRUE	27	+++?+++?+?+++++++++++?+??+??+++?++++	47.9	49.9124	0.003221	0.0021203	0.483574	0.0134459	0.0000000000000000000000000000000000000000000000000000000000000000000000000000000000000000000000000000000000000000000000000000000000000000000000000000000000000000000000000000000000000000000000000000000000000000000000000000000000000000000000000000000000000000000000000000000000000000003	0.0175748	1.08e-165	214	FALSE	1
	cg05457628-chr5:178908384:SNP	cg05457628	TSS200;TSS200	NM_001040452.3_2;NM_001040451.3_2	RUFY1;RUFY1	Island	chr5	178986728	chr5:178908384:SNP	rs4700831	78344	-0.157908	0.0102213	7.67e-54	25390	G	A	0.2473	0.0175	TRUE	32	+++++++?++++++++++?+++++?+?+++++++++	50.1	62.0639	0.0007656	0.0034014	-0.157656	0.0153084	7.14e-25	0.0204636	1.2e-14	214	FALSE	1
	cg05457628-chr5:179407987:SNP	cg05457628	TSS200;TSS200	NM_001040452.3_2;NM_001040451.3_2	RUFY1;RUFY1	Island	chr5	178986728	chr5:179407987:SNP	rs248258	421259	-0.126093	0.0088517	4.81e-46	26462	C	T	0.3956	0.0258	TRUE	34	+++++++?+++++++--+++++++?+++++++++-+	22	42.2961	0.1288	0.0007604	-0.125749	0.0103742	8.15e-34	0.0113452	1.07e-28	214	FALSE	1
	cg05457628-chr5:178991221:SNP	cg05457628	TSS200;TSS200	NM_001040452.3_2;NM_001040451.3_2	RUFY1;RUFY1	Island	chr5	178986728	chr5:178991221:SNP	rs28607444	4493	0.517489	0.0081387	0	27744	G	A	0.3848	0.0224	TRUE	36	------------------------------------	63.4	95.5641	1.589e-07	0.0041799	0.514553	0.0141412	0.0000000000000000000000000000000000000000000000000000000000000000000000000000000000000000000000000000000000000000000000000000000000000000000000000000000000000000000000000000000000000000000000000000000000000000000000000000000000000000000000000000000000000000000000000000000000000000000000000688	0.022222	5.97e-120	214	FALSE	1
	cg05457628-chr5:179108645:SNP	cg05457628	TSS200;TSS200	NM_001040452.3_2;NM_001040451.3_2	RUFY1;RUFY1	Island	chr5	178986728	chr5:179108645:SNP	rs60216315	121917	0.224825	0.00888	2.02e-141	25213	A	G	0.4141	0.0142	TRUE	32	++++++++++++++++++++?++?++??++++++++	12.4	35.376	0.2691	0.0003618	0.225601	0.0097267	5.24e-119	0.0101335	4.66e-109	214	FALSE	1
	cg05457628-chr5:178948557:SNP	cg05457628	TSS200;TSS200	NM_001040452.3_2;NM_001040451.3_2	RUFY1;RUFY1	Island	chr5	178986728	chr5:178948557:SNP	rs28673645	38171	0.27932	0.0095362	1.37e-188	22147	A	G	0.3838	0.0159	TRUE	28	+++++++?+?+++++++++++?+??+??+++?++++	55.1	60.1747	0.0002502	0.0031881	0.27836	0.0151207	1.11e-75	0.0212532	1.88e-39	214	FALSE	1
	cg05457628-chr5:179078068:SNP	cg05457628	TSS200;TSS200	NM_001040452.3_2;NM_001040451.3_2	RUFY1;RUFY1	Island	chr5	178986728	chr5:179078068:SNP	rs28564876	91340	-0.408565	0.0093627	0	21673	A	G	0.4191	0.0214	TRUE	28	------?-------?-----??--?-??-----?--	60.2	67.9161	2.213e-05	0.0037945	-0.407928	0.0157818	2.56e-147	0.023551	2.04e-67	214	FALSE	1
	cg05457628-chr5:179056159:SNP	cg05457628	TSS200;TSS200	NM_001040452.3_2;NM_001040451.3_2	RUFY1;RUFY1	Island	chr5	178986728	chr5:179056159:SNP	rs13164573	69431	-0.156244	0.0112554	8.18e-44	17197	G	A	0.3621	0.0491	TRUE	21	+++??+????++?++?++++??++?+??+++?+?-+	29.7	28.4667	0.0988	0.0011575	-0.157904	0.0142025	1.03e-28	0.0160202	1.79e-22	214	FALSE	1
	cg05457628-chr5:179009704:SNP	cg05457628	TSS200;TSS200	NM_001040452.3_2;NM_001040451.3_2	RUFY1;RUFY1	Island	chr5	178986728	chr5:179009704:SNP	rs10479544	22976	-0.593733	0.0084123	0	24998	T	C	0.3825	0.0171	TRUE	33	-------?-?--------------?-----------	68.2	100.567	5.201e-09	0.0050787	-0.591391	0.0157129	0.000000000000000000000000000000000000000000000000000000000000000000000000000000000000000000000000000000000000000000000000000000000000000000000000000000000000000000000000000000000000000000000000000000000000000000000000000000000000000000000000000000000000000000000000000000000000000000000000000000000000000000000528999999999998	0.0264373	1.07e-111	214	FALSE	1
	cg05457628-chr5:179430266:SNP	cg05457628	TSS200;TSS200	NM_001040452.3_2;NM_001040451.3_2	RUFY1;RUFY1	Island	chr5	178986728	chr5:179430266:SNP	rs248317	443538	-0.123708	0.008725	1.24e-45	27225	C	T	0.3945	0.0257	TRUE	35	+++++++++++++++--+++++++?+++++++++-+	16.2	40.5583	0.2036	0.0005203	-0.123467	0.0097903	1.83e-36	0.0104079	1.4e-32	214	FALSE	1
	cg05457628-chr5:179034260:SNP	cg05457628	TSS200;TSS200	NM_001040452.3_2;NM_001040451.3_2	RUFY1;RUFY1	Island	chr5	178986728	chr5:179034260:SNP	rs4701140	47532	-0.16514	0.0088413	0	25120	G	A	0.4983	0.0227	TRUE	32	++++++?++++-++++++++++++?-??++++++++	68.5	98.304	6.354e-09	0.005516	-0.165828	0.0166183	1.89e-23	0.0280367	3.86e-09	214	FALSE	1
	cg05457628-chr5:178888580:INDEL	cg05457628	TSS200;TSS200	NM_001040452.3_2;NM_001040451.3_2	RUFY1;RUFY1	Island	chr5	178986728	chr5:178888580:INDEL	chr5.178888580	98148	0.198866	0.0164006	7.74e-34	16768	I	D	0.1239	0.01	TRUE	21	?--??--???-+?--?----??--?-?-?--??---	0	18.7426	0.5386	0	0.198866	0.0164006	7.74e-34	0.0164006	7.74e-34	214	FALSE	1
	cg05457628-chr5:179001459:SNP	cg05457628	TSS200;TSS200	NM_001040452.3_2;NM_001040451.3_2	RUFY1;RUFY1	Island	chr5	178986728	chr5:179001459:SNP	rs77842641	14731	-0.275894	0.012415	2.08e-109	27092	A	G	0.1411	0.0226	TRUE	35	--------------------------?---------	28.1	47.2808	0.06461	0.0021351	-0.273573	0.0152431	5.03e-72	0.0172645	1.75e-57	214	FALSE	1
	cg05457628-chr5:179457040:INDEL	cg05457628	TSS200;TSS200	NM_001040452.3_2;NM_001040451.3_2	RUFY1;RUFY1	Island	chr5	178986728	chr5:179457040:INDEL	chr5.179457040	470312	-0.126315	0.0115748	1e-27	16769	D	I	0.3355	0.0398	TRUE	21	?--??--???--?--?+---??--?-?-?--??-+-	31.7	29.2931	0.08215	0.0013421	-0.122047	0.014778	1.47e-16	0.0169531	9.27e-14	214	FALSE	1
	cg05457628-chr5:179032187:SNP	cg05457628	TSS200;TSS200	NM_001040452.3_2;NM_001040451.3_2	RUFY1;RUFY1	Island	chr5	178986728	chr5:179032187:SNP	rs6601058	45459	0.105158	0.0101397	3.36e-25	27741	A	G	0.2322	0.0275	TRUE	36	++++++++++++-++-++++++++++++++++++++	16.3	41.8304	0.1984	0.000731	0.106826	0.011385	6.41e-21	0.0121185	4.05e-18	214	FALSE	1
	cg05457628-chr5:179091755:SNP	cg05457628	TSS200;TSS200	NM_001040452.3_2;NM_001040451.3_2	RUFY1;RUFY1	Island	chr5	178986728	chr5:179091755:SNP	rs67339291	105027	-0.291401	0.0173107	1.39e-63	16709	G	A	0.1129	0.0154	TRUE	24	++++++????++?+++?+++?+?+?+??+++++?++	0	16.6279	0.8271	0	-0.291401	0.0173107	1.39e-63	0.0173107	1.39e-63	214	FALSE	1
	cg05457628-chr5:179099688:SNP	cg05457628	TSS200;TSS200	NM_001040452.3_2;NM_001040451.3_2	RUFY1;RUFY1	Island	chr5	178986728	chr5:179099688:SNP	rs77139501	112960	-0.217592	0.0266689	3.38e-16	5416	A	G	0.1495	0.0114	TRUE	7	?--???????--?????-???????-?????-????	0	3.18819	0.7849	0	-0.217592	0.0266689	3.38e-16	0.0266689	3.38e-16	214	FALSE	1
	cg05457628-chr5:179405399:SNP	cg05457628	TSS200;TSS200	NM_001040452.3_2;NM_001040451.3_2	RUFY1;RUFY1	Island	chr5	178986728	chr5:179405399:SNP	rs27019	418671	-0.124021	0.0088484	1.24e-44	26443	G	C	0.397	0.0261	TRUE	34	+++++++?+++++++--+++++++?+++++++++-+	18.1	40.3039	0.1785	0.000597	-0.123808	0.0100797	1.12e-34	0.0108068	1.74e-30	214	FALSE	1
	cg05457628-chr5:178897465:SNP	cg05457628	TSS200;TSS200	NM_001040452.3_2;NM_001040451.3_2	RUFY1;RUFY1	Island	chr5	178986728	chr5:178897465:SNP	rs4701169	89263	-0.216381	0.0153347	3.27e-45	18913	G	A	0.1276	0.0132	TRUE	23	+++?+?++++++++?-++????+??+??+?+++?++	0	17.5483	0.7324	0	-0.216381	0.0153347	3.27e-45	0.0153347	3.27e-45	214	FALSE	1
	cg05457628-chr5:179576363:SNP	cg05457628	TSS200;TSS200	NM_001040452.3_2;NM_001040451.3_2	RUFY1;RUFY1	Island	chr5	178986728	chr5:179576363:SNP	rs62406062	589635	-0.108968	0.0131624	1.25e-16	19615	A	G	0.1845	0.0282	TRUE	24	---?---???----??--?-??--?+??-----++-	26.7	31.397	0.1133	0.001551	-0.108546	0.0160999	1.56e-11	0.0179679	1.32e-09	214	FALSE	1
	cg05457628-chr5:178891696:SNP	cg05457628	TSS200;TSS200	NM_001040452.3_2;NM_001040451.3_2	RUFY1;RUFY1	Island	chr5	178986728	chr5:178891696:SNP	rs12055176	95032	0.132029	0.0125393	6.33e-26	27212	T	C	0.1337	0.0137	TRUE	35	++++-++++++-+-+-+++++++-?+++++++++++	7.5	36.7621	0.3421	0.0004541	0.130517	0.0132687	7.85e-23	0.0135579	2.07e-22	214	FALSE	1
	cg05457628-chr5:179260213:SNP	cg05457628	TSS200;TSS200	NM_001040452.3_2;NM_001040451.3_2	RUFY1;RUFY1	Island	chr5	178986728	chr5:179260213:SNP	rs4797	273485	0.15962	0.0089238	1.49e-71	24996	G	A	0.4589	0.0356	TRUE	33	-------?-?------+-------?-----------	18.5	39.2401	0.1771	0.0006038	0.16106	0.0102182	5.67e-56	0.0109429	3.42e-48	214	FALSE	1
	cg05457628-chr5:179390003:SNP	cg05457628	TSS200;TSS200	NM_001040452.3_2;NM_001040451.3_2	RUFY1;RUFY1	Island	chr5	178986728	chr5:179390003:SNP	rs27010	403275	-0.116043	0.0089367	1.49e-38	26624	A	C	0.3672	0.0205	TRUE	34	----------------+-------?-?---------	15.4	38.9905	0.2183	0.0004996	-0.117597	0.0099851	5.11e-32	0.010559	4.27e-28	214	FALSE	1
	cg05457628-chr5:178998505:INDEL	cg05457628	TSS200;TSS200	NM_001040452.3_2;NM_001040451.3_2	RUFY1;RUFY1	Island	chr5	178986728	chr5:178998505:INDEL	chr5.178998505	11777	0.529372	0.0105694	0	16743	D	I	0.3756	0.0223	TRUE	21	?++??++???++?++?++++??++?+?+?++??+++	54.2	43.67	0.001666	0.0028568	0.52104	0.016747	1.63e-212	0.0230782	1.93e-116	214	FALSE	1
	cg05457628-chr5:178987726:INDEL	cg05457628	TSS200;TSS200	NM_001040452.3_2;NM_001040451.3_2	RUFY1;RUFY1	Island	chr5	178986728	chr5:178987726:INDEL	chr5.178987726	998	0.370672	0.011412	1.98e-231	16763	D	I	0.3171	0.0236	TRUE	21	?++??++???++?++?++++??++?+?+?++??+++	57.2	46.6999	0.0006455	0.0037556	0.362253	0.0186712	7.47e-84	0.026647	5.47e-44	214	FALSE	1
	cg05457628-chr5:178853219:SNP	cg05457628	TSS200;TSS200	NM_001040452.3_2;NM_001040451.3_2	RUFY1;RUFY1	Island	chr5	178986728	chr5:178853219:SNP	rs4700809	133509	0.145365	0.0086849	6.97e-63	26610	C	T	0.4513	0.0432	TRUE	34	------------------------?-?---------	28.6	46.2195	0.06306	0.0010423	0.14786	0.0107362	3.75e-43	0.012164	6.46e-33	214	FALSE	1
	cg05457628-chr5:179065148:SNP	cg05457628	TSS200;TSS200	NM_001040452.3_2;NM_001040451.3_2	RUFY1;RUFY1	Island	chr5	178986728	chr5:179065148:SNP	rs4700818	78420	-0.292973	0.0145565	4.31e-90	22287	T	C	0.1239	0.0184	TRUE	29	------??----?-----------?-??-----?--	0	22.1974	0.7721	0	-0.292973	0.0145565	4.31e-90	0.0145565	4.31e-90	214	FALSE	1
	cg05457628-chr5:179458527:SNP	cg05457628	TSS200;TSS200	NM_001040452.3_2;NM_001040451.3_2	RUFY1;RUFY1	Island	chr5	178986728	chr5:179458527:SNP	rs10078977	471799	-0.125071	0.0087223	1.24e-46	27244	C	T	0.3955	0.0257	TRUE	35	+++++++++++++++--+++++++?+++++++++-+	17.2	41.0713	0.1883	0.0005607	-0.124872	0.0098626	9.71e-37	0.0105363	1.69e-32	214	FALSE	1
	cg05457628-chr5:179039397:SNP	cg05457628	TSS200;TSS200	NM_001040452.3_2;NM_001040451.3_2	RUFY1;RUFY1	Island	chr5	178986728	chr5:179039397:SNP	rs34316961	52669	0.774905	0.009634	0	25117	A	G	0.2173	0.0208	TRUE	32	+++++++?++++++++++++++++?+?++++?++++	66	91.285	7.479e-08	0.0058654	0.771276	0.0174648	0	0.028369	2.8e-164	214	FALSE	1
	cg05457628-chr5:178964318:SNP	cg05457628	TSS200;TSS200	NM_001040452.3_2;NM_001040451.3_2	RUFY1;RUFY1	Island	chr5	178986728	chr5:178964318:SNP	rs28459693	22410	0.342746	0.0154696	9.11e-109	19207	T	G	0.1236	0.0092	TRUE	23	+++??++???++?++?++++??++?+??+++?++++	64.3	61.5575	1.311e-05	0.0101118	0.350895	0.0276074	5.19e-37	0.0432851	2.41e-15	214	FALSE	1
	cg05457628-chr5:178883832:SNP	cg05457628	TSS200;TSS200	NM_001040452.3_2;NM_001040451.3_2	RUFY1;RUFY1	Island	chr5	178986728	chr5:178883832:SNP	rs62394906	102896	-0.271343	0.0122013	1.44e-109	23047	A	G	0.1753	0.0298	TRUE	30	-------?-?--------??----?-?---------	25.3	38.8283	0.105	0.0015375	-0.270635	0.0147137	1.48e-75	0.0163364	5.92e-62	214	FALSE	1
	cg05457628-chr5:178957057:SNP	cg05457628	TSS200;TSS200	NM_001040452.3_2;NM_001040451.3_2	RUFY1;RUFY1	Island	chr5	178986728	chr5:178957057:SNP	rs13163745	29671	0.411361	0.0104898	0	25473	C	T	0.2164	0.0166	TRUE	32	-------?-------------?--?-?---------	10.7	34.7103	0.2954	0.0004276	0.411136	0.0113303	0.00000000000000000000000000000000000000000000000000000000000000000000000000000000000000000000000000000000000000000000000000000000000000000000000000000000000000000000000000000000000000000000000000000000000000000000000000000000000000000000000000000000000000000000000000000000000000000000000266	0.0117453	0.0000000000000000000000000000000000000000000000000000000000000000000000000000000000000000000000000000000000000000000000000000000000000000000000000000000000000000000000000000000000000000000000000000000000000000000000000000000000000000000000000000000000000000000000000000986	214	FALSE	1
	cg05457628-chr5:179029240:INDEL	cg05457628	TSS200;TSS200	NM_001040452.3_2;NM_001040451.3_2	RUFY1;RUFY1	Island	chr5	178986728	chr5:179029240:INDEL	chr5.179029240	42512	-0.464048	0.0142593	2.58e-232	24276	D	I	0.1114	0.0126	TRUE	32	-------?-?--------------?------?----	2.1	31.6494	0.4339	0.0001384	-0.464468	0.0144788	8.63e-226	0.014558	5.76e-223	214	FALSE	1
	cg05457628-chr5:178856820:SNP	cg05457628	TSS200;TSS200	NM_001040452.3_2;NM_001040451.3_2	RUFY1;RUFY1	Island	chr5	178986728	chr5:178856820:SNP	rs111369660	129908	-0.265705	0.0288016	2.83e-20	12705	T	C	0.0538	0.0109	TRUE	16	?--??-????--?--?+--???-??-???--???--	0	14.9915	0.452	0	-0.265705	0.0288016	2.83e-20	0.0288016	2.83e-20	214	FALSE	1
	cg05457628-chr5:179197403:SNP	cg05457628	TSS200;TSS200	NM_001040452.3_2;NM_001040451.3_2	RUFY1;RUFY1	Island	chr5	178986728	chr5:179197403:SNP	rs13172893	210675	0.142227	0.0086857	2.89e-60	26195	A	G	0.5061	0.0204	TRUE	34	+++++++++++++++++++?++++++?+++++++++	6.8	35.4169	0.3549	0.0001906	0.143211	0.0091348	2.16e-55	0.0093218	1.47e-52	214	FALSE	1
	cg05457628-chr5:179089804:SNP	cg05457628	TSS200;TSS200	NM_001040452.3_2;NM_001040451.3_2	RUFY1;RUFY1	Island	chr5	178986728	chr5:179089804:SNP	rs139119708	103076	0.528239	0.0410507	6.82e-38	5416	C	G	0.0588	0.0135	TRUE	10	?++?+??????+?+???+???????+?????+??++	21	11.3879	0.2501	0.0046804	0.518479	0.0480465	3.79e-27	0.0519422	2.71e-24	214	FALSE	1
	cg05457628-chr5:178996435:SNP	cg05457628	TSS200;TSS200	NM_001040452.3_2;NM_001040451.3_2	RUFY1;RUFY1	Island	chr5	178986728	chr5:178996435:SNP	rs11743261	9707	0.517619	0.0081386	0	27741	G	A	0.3849	0.0225	TRUE	36	------------------------------------	63.8	96.7553	1.068e-07	0.0042618	0.514535	0.0142259	0.000000000000000000000000000000000000000000000000000000000000000000000000000000000000000000000000000000000000000000000000000000000000000000000000000000000000000000000000000000000000000000000000000000000000000000000000000000000000000000000000000000000000000000000000000000000000000000000189	0.0224987	4e-117	214	FALSE	1
	cg05457628-chr5:179084974:SNP	cg05457628	TSS200;TSS200	NM_001040452.3_2;NM_001040451.3_2	RUFY1;RUFY1	Island	chr5	178986728	chr5:179084974:SNP	rs75469073	98246	0.271379	0.0190236	3.6e-46	11361	G	A	0.1402	0.0116	TRUE	17	?--??-????--?--?----???-?-???--???--	61.3	41.3128	0.0004992	0.0099788	0.275008	0.0325996	3.29e-17	0.0491198	3.3e-08	214	FALSE	1
	cg05457628-chr5:178973259:SNP	cg05457628	TSS200;TSS200	NM_001040452.3_2;NM_001040451.3_2	RUFY1;RUFY1	Island	chr5	178986728	chr5:178973259:SNP	rs10041685	13469	0.661255	0.008556	0	26462	T	C	0.2993	0.0192	TRUE	34	+++++++?++++++++++++++++?+++++++++++	60.4	83.2484	3.17e-06	0.0038399	0.658503	0.0143037	0	0.0215839	4e-206	214	FALSE	1
	cg05457628-chr5:179038591:INDEL	cg05457628	TSS200;TSS200	NM_001040452.3_2;NM_001040451.3_2	RUFY1;RUFY1	Island	chr5	178986728	chr5:179038591:INDEL	chr5.179038591	51863	-0.462506	0.0143089	3.32e-229	24276	I	D	0.1105	0.0125	TRUE	32	+++++++?+?++++++++++++++?++++++?++++	0	30.3681	0.4983	0	-0.462506	0.0143089	3.32e-229	0.0143089	3.32e-229	214	FALSE	1
	cg05457628-chr5:179051238:SNP	cg05457628	TSS200;TSS200	NM_001040452.3_2;NM_001040451.3_2	RUFY1;RUFY1	Island	chr5	178986728	chr5:179051238:SNP	rs4336318	64510	0.654928	0.0091455	0	26306	T	C	0.2526	0.0218	TRUE	34	+++++++?++++++++++++++++++?+++++++++	57.9	78.4285	1.447e-05	0.0039676	0.654426	0.0148434	0	0.0217354	1.85e-199	214	FALSE	1
	cg05457628-chr5:178953405:SNP	cg05457628	TSS200;TSS200	NM_001040452.3_2;NM_001040451.3_2	RUFY1;RUFY1	Island	chr5	178986728	chr5:178953405:SNP	rs62395224	33323	0.410724	0.0107065	0.000000000000000000000000000000000000000000000000000000000000000000000000000000000000000000000000000000000000000000000000000000000000000000000000000000000000000000000000000000000000000000000000000000000000000000000000000000000000000000000000000000000000000000000000000000000000000000000000000000000000000000000000000000000568175492717434	24046	G	A	0.2203	0.0168	TRUE	31	-------?-?-----------?--?-?---------	0	29.8676	0.4724	0	0.410724	0.0107065	0.000000000000000000000000000000000000000000000000000000000000000000000000000000000000000000000000000000000000000000000000000000000000000000000000000000000000000000000000000000000000000000000000000000000000000000000000000000000000000000000000000000000000000000000000000000000000000000000000000000000000000000000000000000000568175492717434	0.0107065	0.000000000000000000000000000000000000000000000000000000000000000000000000000000000000000000000000000000000000000000000000000000000000000000000000000000000000000000000000000000000000000000000000000000000000000000000000000000000000000000000000000000000000000000000000000000000000000000000000000000000000000000000000000000000568175492717434	214	FALSE	1
	cg05457628-chr5:178901583:SNP	cg05457628	TSS200;TSS200	NM_001040452.3_2;NM_001040451.3_2	RUFY1;RUFY1	Island	chr5	178986728	chr5:178901583:SNP	rs7719333	85145	-0.121381	0.00941	4.55e-38	23953	G	A	0.355	0.0241	TRUE	31	+++++++?+?++++++++?+++++?+?+-+++++-+	11.9	34.0384	0.2793	0.0003757	-0.12221	0.0102745	1.27e-32	0.0106767	5.98e-30	214	FALSE	1
	cg05457628-chr5:178847001:SNP	cg05457628	TSS200;TSS200	NM_001040452.3_2;NM_001040451.3_2	RUFY1;RUFY1	Island	chr5	178986728	chr5:178847001:SNP	rs62394880	139727	0.147026	0.0102493	1.15e-46	23171	T	G	0.2904	0.0318	TRUE	30	+++++++?++++?+++++++++++?+??+++++?-+	17.2	35.0089	0.2042	0.0006653	0.146671	0.0116686	3.1e-36	0.012373	1.45e-32	214	FALSE	1
	cg05457628-chr5:179172856:SNP	cg05457628	TSS200;TSS200	NM_001040452.3_2;NM_001040451.3_2	RUFY1;RUFY1	Island	chr5	178986728	chr5:179172856:SNP	rs34785307	186128	0.141446	0.0092085	3.02e-53	23249	A	G	0.5054	0.0215	TRUE	31	+++++++?+?+++++++++?++++++?++++?++++	0	26.3467	0.6573	0	0.141446	0.0092085	3.02e-53	0.0092085	3.02e-53	214	FALSE	1
	cg05457628-chr5:178964352:SNP	cg05457628	TSS200;TSS200	NM_001040452.3_2;NM_001040451.3_2	RUFY1;RUFY1	Island	chr5	178986728	chr5:178964352:SNP	rs10074907	22376	0.693942	0.0085585	0	21461	A	G	0.4417	0.05	TRUE	27	+++?+++?+?++++++++++??++?+??+++?++++	81.9	143.743	2.903e-18	0.0091265	0.678516	0.0211597	1.29e-225	0.0473161	1.06e-48	214	FALSE	1
	cg05457628-chr5:179016664:SNP	cg05457628	TSS200;TSS200	NM_001040452.3_2;NM_001040451.3_2	RUFY1;RUFY1	Island	chr5	178986728	chr5:179016664:SNP	rs6895677	29936	0.792302	0.0093544	0	26382	T	A	0.2173	0.0203	TRUE	34	------?-----------------?-----------	64.8	93.7339	9.94e-08	0.0055509	0.788888	0.0165972	0	0.0265705	2.23e-195	214	FALSE	1
	cg05457628-chr5:178982416:SNP	cg05457628	TSS200;TSS200	NM_001040452.3_2;NM_001040451.3_2	RUFY1;RUFY1	Island	chr5	178986728	chr5:178982416:SNP	rs4701130	4312	0.880905	0.0069089	0	27739	G	A	0.3932	0.0173	TRUE	36	------------------------------------	79.3	169.342	1.569e-19	0.0066754	0.876713	0.0158745	0	0.0334274	4.77e-153	214	FALSE	1
	cg05457628-chr5:179116247:SNP	cg05457628	TSS200;TSS200	NM_001040452.3_2;NM_001040451.3_2	RUFY1;RUFY1	Island	chr5	178986728	chr5:179116247:SNP	rs7719302	129519	0.226461	0.0094098	5.6e-128	22498	A	G	0.4132	0.0149	TRUE	29	+++++++?+?++++++++++?++??+??++++++++	10.2	31.1765	0.3093	0.0002967	0.226899	0.010159	1.7e-110	0.0104773	1.31e-103	214	FALSE	1
	cg05457628-chr5:179077130:SNP	cg05457628	TSS200;TSS200	NM_001040452.3_2;NM_001040451.3_2	RUFY1;RUFY1	Island	chr5	178986728	chr5:179077130:SNP	rs4585401	90402	-0.442153	0.0107879	0	15956	G	A	0.4421	0.0562	TRUE	20	+++??+????++?+??++++??++?+??+++?+?++	49.1	37.3162	0.007243	0.00232	-0.440114	0.0163116	2.43e-160	0.0211875	1.03e-96	214	FALSE	1
	cg05457628-chr5:179224095:INDEL	cg05457628	TSS200;TSS200	NM_001040452.3_2;NM_001040451.3_2	RUFY1;RUFY1	Island	chr5	178986728	chr5:179224095:INDEL	chr5.179224095	237367	0.19598	0.0097382	4.47e-90	21085	D	I	0.4195	0.0211	TRUE	27	+++?++??+?++++++-++?+?++?+?++++?++++	36.4	40.8774	0.03193	0.0014954	0.199842	0.0129067	4.48e-54	0.0153105	1.63e-37	214	FALSE	1
	cg05457628-chr5:179025026:SNP	cg05457628	TSS200;TSS200	NM_001040452.3_2;NM_001040451.3_2	RUFY1;RUFY1	Island	chr5	178986728	chr5:179025026:SNP	rs79834143	38298	-0.464191	0.0133218	0.0000000000000000000000000000000000000000000000000000000000000000000000000000000000000000000000000000000000000000000000000000000000000000000000000000000000000000000000000000000000000000000000000000000000000000000000000000000000000000000000000000000000000000000000000518	27744	T	C	0.1111	0.0118	TRUE	36	------------------------------------	0	32.7374	0.5778	0	-0.464191	0.0133218	0.0000000000000000000000000000000000000000000000000000000000000000000000000000000000000000000000000000000000000000000000000000000000000000000000000000000000000000000000000000000000000000000000000000000000000000000000000000000000000000000000000000000000000000000000000518	0.0133218	0.0000000000000000000000000000000000000000000000000000000000000000000000000000000000000000000000000000000000000000000000000000000000000000000000000000000000000000000000000000000000000000000000000000000000000000000000000000000000000000000000000000000000000000000000000518	214	FALSE	1
	cg05457628-chr5:179252537:SNP	cg05457628	TSS200;TSS200	NM_001040452.3_2;NM_001040451.3_2	RUFY1;RUFY1	Island	chr5	178986728	chr5:179252537:SNP	rs3734007	265809	-0.131319	0.0084642	2.76e-54	27726	G	A	0.4927	0.0308	TRUE	36	+++++++++++++++--+++++++++++++++++++	23.4	45.6637	0.1071	0.0007962	-0.133021	0.0100308	3.89e-40	0.011043	1.31e-32	214	FALSE	1
	cg05457628-chr5:179051456:SNP	cg05457628	TSS200;TSS200	NM_001040452.3_2;NM_001040451.3_2	RUFY1;RUFY1	Island	chr5	178986728	chr5:179051456:SNP	rs17052463	64728	0.625825	0.014821	0	26277	T	C	0.0918	0.0087	TRUE	34	++++++?+++++++++++++++++++?+++++++++	39.4	54.443	0.01081	0.0049192	0.627409	0.020029	2.13e-215	0.0244516	1.76e-144	214	FALSE	1
	cg05457628-chr5:179056217:SNP	cg05457628	TSS200;TSS200	NM_001040452.3_2;NM_001040451.3_2	RUFY1;RUFY1	Island	chr5	178986728	chr5:179056217:SNP	rs13182022	69489	0.620202	0.0155365	0	24099	A	G	0.0908	0.0089	TRUE	31	++++++??++++++++++++++++++??+++?++++	40	49.9871	0.01244	0.0050658	0.621194	0.0212027	1.1e-188	0.0258875	7.71e-127	214	FALSE	1
	cg05457628-chr5:179057366:INDEL	cg05457628	TSS200;TSS200	NM_001040452.3_2;NM_001040451.3_2	RUFY1;RUFY1	Island	chr5	178986728	chr5:179057366:INDEL	chr5.179057366	70638	-0.470684	0.017792	3.21e-154	15908	D	I	0.1079	0.0104	TRUE	20	?--??-????--?--?----??--?-?-?--??---	0	11.681	0.8988	0	-0.470684	0.017792	3.21e-154	0.017792	3.21e-154	214	FALSE	1
	cg05457628-chr5:179141031:SNP	cg05457628	TSS200;TSS200	NM_001040452.3_2;NM_001040451.3_2	RUFY1;RUFY1	Island	chr5	178986728	chr5:179141031:SNP	rs4526069	154303	-0.215259	0.0128192	2.8e-63	25562	T	G	0.1382	0.011	TRUE	33	-------------------?------??--------	0	30.1491	0.5605	0	-0.215259	0.0128192	2.8e-63	0.0128192	2.8e-63	214	FALSE	1
	cg05457628-chr5:179245749:SNP	cg05457628	TSS200;TSS200	NM_001040452.3_2;NM_001040451.3_2	RUFY1;RUFY1	Island	chr5	178986728	chr5:179245749:SNP	rs1872779	259021	0.120506	0.0123877	2.29e-22	12743	G	C	0.4426	0.0201	TRUE	16	---???????--?-??--????-??-??+-?--?--	43.2	26.3944	0.03408	0.0019621	0.129722	0.0179292	4.65e-13	0.0217977	3.23e-08	214	FALSE	1
	cg05457628-chr5:179133608:SNP	cg05457628	TSS200;TSS200	NM_001040452.3_2;NM_001040451.3_2	RUFY1;RUFY1	Island	chr5	178986728	chr5:179133608:SNP	rs10903245	146880	-0.156839	0.0088336	1.58e-70	25221	T	C	0.4849	0.0214	TRUE	32	-------------------?-?----??--------	24.4	40.995	0.1081	0.0008177	-0.159288	0.010576	2.91e-51	0.0116818	4.26e-41	214	FALSE	1
	cg05457628-chr5:179047143:SNP	cg05457628	TSS200;TSS200	NM_001040452.3_2;NM_001040451.3_2	RUFY1;RUFY1	Island	chr5	178986728	chr5:179047143:SNP	rs4608884	60415	0.694786	0.0194017	0.0000000000000000000000000000000000000000000000000000000000000000000000000000000000000000000000000000000000000000000000000000000000000000000000000000000000000000000000000000000000000000000000000000000000000000000000000000000000000000000000000000000000000000000000000000000000000000755	23428	A	G	0.0574	0.0079	TRUE	31	++++++?++++++++++++++?++?+++++?++?++	39.1	49.2714	0.01475	0.0076136	0.694849	0.0261658	2.21e-155	0.0318649	2.12e-105	214	FALSE	1
	cg05457628-chr5:179087716:SNP	cg05457628	TSS200;TSS200	NM_001040452.3_2;NM_001040451.3_2	RUFY1;RUFY1	Island	chr5	178986728	chr5:179087716:SNP	rs145295304	100988	-0.294671	0.0174963	1.2e-63	16388	G	A	0.1127	0.0158	TRUE	23	++++++????++?++??+++?+?+?+??+++++?++	0	15.5939	0.8355	0	-0.294671	0.0174963	1.2e-63	0.0174963	1.2e-63	214	FALSE	1
	cg05457628-chr5:179014452:SNP	cg05457628	TSS200;TSS200	NM_001040452.3_2;NM_001040451.3_2	RUFY1;RUFY1	Island	chr5	178986728	chr5:179014452:SNP	rs34360628	27724	0.630223	0.0144365	0	27745	G	T	0.0909	0.0084	TRUE	36	------------------------------------	38.6	57.0202	0.01077	0.0047776	0.631759	0.0193211	1.67e-234	0.0235192	3.59e-158	214	FALSE	1
	cg05457628-chr5:178889779:SNP	cg05457628	TSS200;TSS200	NM_001040452.3_2;NM_001040451.3_2	RUFY1;RUFY1	Island	chr5	178986728	chr5:178889779:SNP	rs4701159	96949	0.134401	0.0125645	1.05e-26	27208	C	T	0.1334	0.014	TRUE	35	----+------+-+-+-------+?-----------	5.9	36.1346	0.3691	0.0003524	0.133248	0.0131388	3.61e-24	0.0133533	7.89e-24	214	FALSE	1
	cg05457628-chr5:178890302:SNP	cg05457628	TSS200;TSS200	NM_001040452.3_2;NM_001040451.3_2	RUFY1;RUFY1	Island	chr5	178986728	chr5:178890302:SNP	rs4701162	96426	0.133645	0.0125645	2.01e-26	27208	G	A	0.1334	0.014	TRUE	35	----+------+-+-+-------+?-----------	5.6	36.0015	0.375	0.0003304	0.132603	0.0131053	4.58e-24	0.0133042	9.63e-24	214	FALSE	1
	cg05457628-chr5:179144722:INDEL	cg05457628	TSS200;TSS200	NM_001040452.3_2;NM_001040451.3_2	RUFY1;RUFY1	Island	chr5	178986728	chr5:179144722:INDEL	chr5.179144722	157994	-0.24631	0.0202479	4.79e-34	9694	D	I	0.1429	0.0124	TRUE	12	?--???????--?-??+-????-??-????-???--	27.7	15.213	0.173	0.0020398	-0.253679	0.0260402	2e-22	0.0280028	1.42e-18	214	FALSE	1
	cg05457628-chr5:179259030:SNP	cg05457628	TSS200;TSS200	NM_001040452.3_2;NM_001040451.3_2	RUFY1;RUFY1	Island	chr5	178986728	chr5:179259030:SNP	rs269445	272302	0.157708	0.0089728	3.75e-69	24998	G	A	0.4351	0.0267	TRUE	33	-------?-?-----++-------?-----------	33.1	47.8223	0.03572	0.0013335	0.159387	0.0114914	9.61e-44	0.0134093	6.2e-32	214	FALSE	1
	cg05457628-chr5:179066623:INDEL	cg05457628	TSS200;TSS200	NM_001040452.3_2;NM_001040451.3_2	RUFY1;RUFY1	Island	chr5	178986728	chr5:179066623:INDEL	chr5.179066623	79895	0.61335	0.0285941	4.54e-102	6926	I	D	0.0915	0.0042	TRUE	11	?--???????--?-??--???????-????-???--	0	9.15582	0.5174	0	0.61335	0.0285941	4.54e-102	0.0285941	4.54e-102	214	FALSE	1
	cg05457628-chr5:178885605:SNP	cg05457628	TSS200;TSS200	NM_001040452.3_2;NM_001040451.3_2	RUFY1;RUFY1	Island	chr5	178986728	chr5:178885605:SNP	rs62394907	101123	0.151088	0.0127043	1.29e-32	27236	T	A	0.13	0.0151	TRUE	35	----+------+---+--------?----------+	26	45.9502	0.08283	0.0020172	0.147112	0.0154325	1.53e-21	0.0171696	1.37e-18	214	FALSE	1
	cg05457628-chr5:178858382:SNP	cg05457628	TSS200;TSS200	NM_001040452.3_2;NM_001040451.3_2	RUFY1;RUFY1	Island	chr5	178986728	chr5:178858382:SNP	rs10903237	128346	0.182263	0.0088456	2.48e-94	26604	T	C	0.3829	0.0303	TRUE	34	++++++++++++++++++++++++?+?+++++++++	26.3	44.7698	0.08298	0.0009623	0.182966	0.0107288	3.29e-65	0.0120004	4.25e-52	214	FALSE	1
	cg05457628-chr5:179122774:SNP	cg05457628	TSS200;TSS200	NM_001040452.3_2;NM_001040451.3_2	RUFY1;RUFY1	Island	chr5	178986728	chr5:179122774:SNP	rs13164674	136046	-0.160779	0.009703	1.15e-61	20889	C	T	0.4861	0.0206	TRUE	27	++++++??+?+++++-+++?+?++?+??+++?++++	8.3	28.3659	0.3407	0.0002362	-0.161834	0.0103448	3.65e-55	0.0105859	4.25e-52	214	FALSE	1
	cg05457628-chr5:178883743:SNP	cg05457628	TSS200;TSS200	NM_001040452.3_2;NM_001040451.3_2	RUFY1;RUFY1	Island	chr5	178986728	chr5:178883743:SNP	rs6601034	102985	0.150357	0.0126931	2.27e-32	27254	C	A	0.1302	0.0146	TRUE	35	----+------+---+--------?----------+	24.4	44.9672	0.09887	0.001848	0.146769	0.01523	5.59e-22	0.0167875	3.35e-19	214	FALSE	1
	cg05457628-chr5:179047408:SNP	cg05457628	TSS200;TSS200	NM_001040452.3_2;NM_001040451.3_2	RUFY1;RUFY1	Island	chr5	178986728	chr5:179047408:SNP	rs116087223	60680	-0.289312	0.0237793	4.68e-34	20196	G	A	0.0555	0.028	TRUE	25	+++?++???++++++-+++???++?+??+++++?-+	0	22.8503	0.5286	0	-0.289312	0.0237793	4.68e-34	0.0237793	4.68e-34	214	FALSE	1
	cg05457628-chr5:178992006:INDEL	cg05457628	TSS200;TSS200	NM_001040452.3_2;NM_001040451.3_2	RUFY1;RUFY1	Island	chr5	178986728	chr5:178992006:INDEL	chr5.178992006	5278	0.744309	0.0192806	0	6550	D	I	0.2096	0.0149	TRUE	9	+??++???+???+??+????+???????+???+???	76.7	34.4053	3.43e-05	0.0114158	0.743261	0.0412863	1.86e-72	0.0829195	2.8e-19	214	FALSE	1
	cg05457628-chr5:179402275:SNP	cg05457628	TSS200;TSS200	NM_001040452.3_2;NM_001040451.3_2	RUFY1;RUFY1	Island	chr5	178986728	chr5:179402275:SNP	rs27013	415547	-0.127507	0.0091058	1.5e-44	24998	G	T	0.3999	0.0262	TRUE	33	+++++++?+?+++++--+++++++?+++++++++-+	15.7	37.9674	0.2159	0.0005174	-0.12725	0.0101947	9.37e-36	0.0108038	3.81e-32	214	FALSE	1
	cg05457628-chr5:178847762:SNP	cg05457628	TSS200;TSS200	NM_001040452.3_2;NM_001040451.3_2	RUFY1;RUFY1	Island	chr5	178986728	chr5:178847762:SNP	rs62394882	138966	0.15069	0.0099216	4.24e-52	24826	T	G	0.2891	0.0307	TRUE	32	++++++++++++++++++++++++?+??+++++?-+	13.2	35.7171	0.2563	0.0004872	0.150618	0.0109443	4.3e-43	0.0114313	1.11e-39	214	FALSE	1
	cg05457628-chr5:179262733:SNP	cg05457628	TSS200;TSS200	NM_001040452.3_2;NM_001040451.3_2	RUFY1;RUFY1	Island	chr5	178986728	chr5:179262733:SNP	rs248242	276005	-0.136108	0.008773	2.77e-54	25745	G	A	0.5185	0.0282	TRUE	33	+++++++?+++++++--+++++++?++++++?++++	14.2	37.2877	0.2388	0.0004261	-0.137428	0.0097351	2.99e-45	0.0102227	1.91e-40	214	FALSE	1
	cg05457628-chr5:178988752:SNP	cg05457628	TSS200;TSS200	NM_001040452.3_2;NM_001040451.3_2	RUFY1;RUFY1	Island	chr5	178986728	chr5:178988752:SNP	rs28599972	2024	0.588898	0.0194342	1.07e-201	24681	T	C	0.0559	0.009	TRUE	31	++++?++?++++++++++++++++?+??++++++++	0	25.7256	0.6891	0	0.588898	0.0194342	1.07e-201	0.0194342	1.07e-201	214	FALSE	1
	cg05457628-chr5:178888936:SNP	cg05457628	TSS200;TSS200	NM_001040452.3_2;NM_001040451.3_2	RUFY1;RUFY1	Island	chr5	178986728	chr5:178888936:SNP	rs12658125	97792	0.134252	0.0125637	1.19e-26	27210	T	A	0.1334	0.0139	TRUE	35	----+------+-+-+-------+?-----------	6.2	36.2331	0.3648	0.0003686	0.133062	0.013163	5.05e-24	0.0133889	1.16e-23	214	FALSE	1
	cg05457628-chr5:178974576:SNP	cg05457628	TSS200;TSS200	NM_001040452.3_2;NM_001040451.3_2	RUFY1;RUFY1	Island	chr5	178986728	chr5:178974576:SNP	rs6879664	12152	0.69994	0.0088433	0	24997	G	T	0.285	0.0177	TRUE	33	-------?-?--------------?-----------	62	84.1613	1.422e-06	0.0042668	0.695144	0.0151043	0	0.0232581	5.74e-199	214	FALSE	1
	cg05457628-chr5:179254340:SNP	cg05457628	TSS200;TSS200	NM_001040452.3_2;NM_001040451.3_2	RUFY1;RUFY1	Island	chr5	178986728	chr5:179254340:SNP	rs546161	267612	0.142276	0.008939	4.88e-57	24997	T	C	0.4576	0.0264	TRUE	33	+++++++?+?+++++--+++++++?+++++++++++	22.5	41.275	0.1261	0.000776	0.143362	0.010543	4.13e-42	0.0115299	5.53e-35	214	FALSE	1
	cg05457628-chr5:178959845:SNP	cg05457628	TSS200;TSS200	NM_001040452.3_2;NM_001040451.3_2	RUFY1;RUFY1	Island	chr5	178986728	chr5:178959845:SNP	rs184239321	26883	0.377633	0.0144136	2.67e-151	14391	A	T	0.1998	0.0214	TRUE	19	+++?+?+?+?++?+??+++???+??+??++??+?++	49.4	35.5828	0.007976	0.0039848	0.380505	0.0217784	2.35e-68	0.0284931	4.31e-40	214	FALSE	1
	cg05457628-chr5:178891595:SNP	cg05457628	TSS200;TSS200	NM_001040452.3_2;NM_001040451.3_2	RUFY1;RUFY1	Island	chr5	178986728	chr5:178891595:SNP	rs12054796	95133	0.131885	0.012552	8.01e-26	27211	C	G	0.1335	0.0137	TRUE	35	++++-++++++-+-+-+++++++-?+++++++++++	7.2	36.6432	0.3471	0.0004354	0.130442	0.0132528	7.38e-23	0.0135278	1.86e-22	214	FALSE	1
	cg05457628-chr5:179334052:SNP	cg05457628	TSS200;TSS200	NM_001040452.3_2;NM_001040451.3_2	RUFY1;RUFY1	Island	chr5	178986728	chr5:179334052:SNP	rs155797	347324	-0.0976236	0.0089661	1.31e-27	25585	C	G	0.4018	0.0385	TRUE	33	---++-??-------++-------?-----------	51.9	66.5368	0.0003234	0.0029061	-0.0953153	0.0136555	2.95e-12	0.0186429	1.64e-07	214	FALSE	1
	cg05457628-chr5:179020728:SNP	cg05457628	TSS200;TSS200	NM_001040452.3_2;NM_001040451.3_2	RUFY1;RUFY1	Island	chr5	178986728	chr5:179020728:SNP	rs67799282	34000	0.629408	0.0144422	0	27745	A	G	0.0909	0.0083	TRUE	36	++++++++++++++++++++++++++++++++++++	38.1	56.5269	0.01205	0.0046744	0.630678	0.0192407	1.2e-235	0.023325	2.26e-160	214	FALSE	1
	cg05457628-chr5:178903391:SNP	cg05457628	TSS200;TSS200	NM_001040452.3_2;NM_001040451.3_2	RUFY1;RUFY1	Island	chr5	178986728	chr5:178903391:SNP	rs7712755	83337	-0.168442	0.009796	2.9e-66	26158	A	G	0.2651	0.0194	TRUE	33	------------------?-----?-?---------	48.7	62.3343	0.001042	0.003045	-0.167811	0.014435	3.07e-31	0.0190821	1.07e-18	214	FALSE	1
	cg05457628-chr5:179094401:SNP	cg05457628	TSS200;TSS200	NM_001040452.3_2;NM_001040451.3_2	RUFY1;RUFY1	Island	chr5	178986728	chr5:179094401:SNP	rs112342922	107673	-0.294202	0.0174837	1.54e-63	16390	A	G	0.1127	0.0156	TRUE	23	------????--?--??---?-?-?-??-----?--	0	15.2638	0.8507	0	-0.294202	0.0174837	1.54e-63	0.0174837	1.54e-63	214	FALSE	1
	cg05457628-chr5:179034045:SNP	cg05457628	TSS200;TSS200	NM_001040452.3_2;NM_001040451.3_2	RUFY1;RUFY1	Island	chr5	178986728	chr5:179034045:SNP	rs13159541	47317	-0.575796	0.0228117	1.41e-140	10968	C	G	0.909	0.0083	TRUE	15	-??--?----?--??-????--??????-??--???	39.5	23.1474	0.05791	0.005234	-0.58233	0.0306304	1.37e-80	0.0377165	1.28e-52	214	FALSE	1
	cg05457628-chr5:179257135:INDEL	cg05457628	TSS200;TSS200	NM_001040452.3_2;NM_001040451.3_2	RUFY1;RUFY1	Island	chr5	178986728	chr5:179257135:INDEL	chr5.179257135	270407	-0.13492	0.0113938	2.38e-32	15190	I	D	0.5037	0.0342	TRUE	19	?++??+????++?++?-+++??++?+?+??+??+++	19.7	22.4065	0.2144	0.000624	-0.136557	0.0132901	9.12e-25	0.014183	1.86e-21	214	FALSE	1
	cg05457628-chr5:178950829:SNP	cg05457628	TSS200;TSS200	NM_001040452.3_2;NM_001040451.3_2	RUFY1;RUFY1	Island	chr5	178986728	chr5:178950829:SNP	rs1344157	35899	0.330535	0.0094352	0.0000000000000000000000000000000000000000000000000000000000000000000000000000000000000000000000000000000000000000000000000000000000000000000000000000000000000000000000000000000000000000000000000000000000000000000000000000000000000000000000000000000000000000000000000000729	23381	C	T	0.3479	0.0158	TRUE	30	-------?-?-----------?--?-??--------	57.4	68.1147	5.467e-05	0.0036636	0.328936	0.0153096	2.12e-102	0.0221612	2.63e-50	214	FALSE	1
	cg05457628-chr5:179398318:SNP	cg05457628	TSS200;TSS200	NM_001040452.3_2;NM_001040451.3_2	RUFY1;RUFY1	Island	chr5	178986728	chr5:179398318:SNP	rs190328	411590	-0.122848	0.009227	1.92e-40	24997	G	C	0.3669	0.0217	TRUE	33	+++++++?+?++++++++++++++?+++++++++++	0	31.4171	0.4959	0	-0.122848	0.009227	1.92e-40	0.009227	1.92e-40	214	FALSE	1
	cg05457628-chr5:179547692:SNP	cg05457628	TSS200;TSS200	NM_001040452.3_2;NM_001040451.3_2	RUFY1;RUFY1	Island	chr5	178986728	chr5:179547692:SNP	rs72813638	560964	0.148955	0.0118236	2.16e-36	25178	A	G	0.1749	0.013	TRUE	32	+++++++?++++++++++++++++?+??++++++++	0	25.4391	0.7477	0	0.148955	0.0118236	2.16e-36	0.0118236	2.16e-36	214	FALSE	1
	cg05457628-chr5:178964079:SNP	cg05457628	TSS200;TSS200	NM_001040452.3_2;NM_001040451.3_2	RUFY1;RUFY1	Island	chr5	178986728	chr5:178964079:SNP	rs7727647	22649	0.720026	0.0077539	0	25775	C	T	0.4257	0.0209	TRUE	33	-------?----------------?--?--------	72.5	116.335	1.652e-11	0.0053005	0.717385	0.0155389	0	0.028189	6.6e-144	214	FALSE	1
	cg05457628-chr5:179077587:SNP	cg05457628	TSS200;TSS200	NM_001040452.3_2;NM_001040451.3_2	RUFY1;RUFY1	Island	chr5	178986728	chr5:179077587:SNP	rs111867293	90859	-0.447555	0.0309272	1.84e-47	6624	T	C	0.0846	0.0086	TRUE	9	-??--???--?-???-????????????-???-???	0	6.27925	0.616	0	-0.447555	0.0309272	1.84e-47	0.0309272	1.84e-47	214	FALSE	1
	cg05457628-chr5:178884988:SNP	cg05457628	TSS200;TSS200	NM_001040452.3_2;NM_001040451.3_2	RUFY1;RUFY1	Island	chr5	178986728	chr5:178884988:SNP	rs11959130	101740	0.150236	0.0127052	2.91e-32	27240	A	G	0.1301	0.015	TRUE	35	++++-++++++-+++-++++++++?++++++++++-	24.8	45.2296	0.09436	0.001896	0.146656	0.0152977	9.08e-22	0.0169015	6.17e-19	214	FALSE	1
	cg05457628-chr5:179251475:SNP	cg05457628	TSS200;TSS200	NM_001040452.3_2;NM_001040451.3_2	RUFY1;RUFY1	Island	chr5	178986728	chr5:179251475:SNP	rs55993594	264747	-0.12786	0.0086841	4.55e-49	26430	G	T	0.4909	0.0318	TRUE	34	+++++++?+++++++--+++++++?+++++++++++	26.5	44.875	0.08137	0.000936	-0.130261	0.0105528	5.27e-35	0.011809	2.56e-27	214	FALSE	1
	cg05457628-chr5:178988608:SNP	cg05457628	TSS200;TSS200	NM_001040452.3_2;NM_001040451.3_2	RUFY1;RUFY1	Island	chr5	178986728	chr5:178988608:SNP	rs6899218	1880	-0.339672	0.0086672	0	24998	T	A	0.4769	0.0202	TRUE	33	++++-++?+?++++++++++++++?+++++++++++	87.9	264.721	1.898e-38	0.0182961	-0.327347	0.0257816	6.15e-37	0.0716994	2.16e-06	214	FALSE	1
	cg05457628-chr5:179098060:SNP	cg05457628	TSS200;TSS200	NM_001040452.3_2;NM_001040451.3_2	RUFY1;RUFY1	Island	chr5	178986728	chr5:179098060:SNP	rs4296765	111332	0.252671	0.0149035	1.81e-64	9640	C	A	0.3546	0.0183	TRUE	14	---?-?????--?-???-???????-??-??--?--	0.1	13.0163	0.4466	4e-06	0.252652	0.014917	2.39e-64	0.0149223	2.59e-64	214	FALSE	1
	cg05457628-chr5:179276916:SNP	cg05457628	TSS200;TSS200	NM_001040452.3_2;NM_001040451.3_2	RUFY1;RUFY1	Island	chr5	178986728	chr5:179276916:SNP	rs78451740	290188	-0.131723	0.0096744	3.24e-42	22099	A	T	0.4241	0.0623	TRUE	28	---?---?-?-----++---??--?-?----?--+-	23.8	35.4417	0.128	0.0008352	-0.132012	0.0115638	3.48e-30	0.0126992	3.31e-25	214	FALSE	1
	cg05457628-chr5:179473218:SNP	cg05457628	TSS200;TSS200	NM_001040452.3_2;NM_001040451.3_2	RUFY1;RUFY1	Island	chr5	178986728	chr5:179473218:SNP	rs62405021	486490	-0.125182	0.0087184	9.45e-47	27240	A	T	0.3945	0.0256	TRUE	35	---------------++-------?---------+-	16	40.4565	0.2067	0.0005115	-0.125106	0.009769	1.51e-37	0.010374	1.58e-33	214	FALSE	1
	cg05457628-chr5:178943803:SNP	cg05457628	TSS200;TSS200	NM_001040452.3_2;NM_001040451.3_2	RUFY1;RUFY1	Island	chr5	178986728	chr5:178943803:SNP	rs59042973	42925	0.236368	0.0148277	3.3e-57	10286	A	G	0.3085	0.0217	TRUE	13	?++???+???++?++?++????+??+????????++	9.9	13.3138	0.3467	0.000335	0.235081	0.0162147	1.25e-47	0.0164511	8.23e-47	214	FALSE	1
	cg05457628-chr5:178840838:INDEL	cg05457628	TSS200;TSS200	NM_001040452.3_2;NM_001040451.3_2	RUFY1;RUFY1	Island	chr5	178986728	chr5:178840838:INDEL	chr5.178840838	145890	0.14988	0.012564	8.32e-33	22538	D	I	0.1697	0.0201	TRUE	30	+++++++?+?+++++--++++-++?+?++++?+?+-	18.7	35.6701	0.1834	0.0011083	0.146928	0.0144443	2.64e-24	0.0154537	3.05e-22	214	FALSE	1
	cg05457628-chr5:178887897:SNP	cg05457628	TSS200;TSS200	NM_001040452.3_2;NM_001040451.3_2	RUFY1;RUFY1	Island	chr5	178986728	chr5:178887897:SNP	rs4700823	98831	0.166827	0.0127612	4.7e-39	27736	C	T	0.1257	0.0142	TRUE	36	----+------+---+--------+----------+	18.8	43.1064	0.1633	0.0013792	0.163315	0.0146822	9.66e-29	0.0157169	2.55e-26	214	FALSE	1
	cg05457628-chr5:178944407:SNP	cg05457628	TSS200;TSS200	NM_001040452.3_2;NM_001040451.3_2	RUFY1;RUFY1	Island	chr5	178986728	chr5:178944407:SNP	rs936817	42321	0.289148	0.008792	3.3e-237	25959	G	A	0.3858	0.0166	TRUE	33	-----------------------?--??--------	60.4	80.8299	4.189e-06	0.0039499	0.29266	0.0147527	1.41e-87	0.022208	9.42e-39	214	FALSE	1
	cg05457628-chr5:178944765:INDEL	cg05457628	TSS200;TSS200	NM_001040452.3_2;NM_001040451.3_2	RUFY1;RUFY1	Island	chr5	178986728	chr5:178944765:INDEL	chr5.178944765	41963	-0.498907	0.0112807	0	14518	I	D	0.3973	0.0134	TRUE	18	?++??+????++?++?++++??++?+????+??+++	16.5	20.3488	0.2568	0.0004684	-0.497988	0.0128858	0	0.0135028	0.0000000000000000000000000000000000000000000000000000000000000000000000000000000000000000000000000000000000000000000000000000000000000000000000000000000000000000000000000000000000000000000000000000000000000000000000000000000000000000000000000000000000000000000000000000000000000000000000000000000000773	214	FALSE	1
	cg05457628-chr5:178887633:SNP	cg05457628	TSS200;TSS200	NM_001040452.3_2;NM_001040451.3_2	RUFY1;RUFY1	Island	chr5	178986728	chr5:178887633:SNP	rs4701158	99095	0.170828	0.0134219	4.16e-37	24770	A	G	0.1273	0.0131	TRUE	33	++++-++?+?+-++++++++?+++-++++++++++-	20.4	40.1941	0.1516	0.0015509	0.166665	0.0156741	2.09e-26	0.0168587	3.95e-24	214	FALSE	1
	cg05457628-chr5:179048693:SNP	cg05457628	TSS200;TSS200	NM_001040452.3_2;NM_001040451.3_2	RUFY1;RUFY1	Island	chr5	178986728	chr5:179048693:SNP	rs75316527	61965	-0.445476	0.0360936	5.37e-35	10357	A	C	0.044	0.0201	TRUE	14	?--?-??-?-?-???-+-????-??-??-?????--	40.5	21.8327	0.05801	0.0132732	-0.466583	0.0518924	2.44e-19	0.0606169	2e-13	214	FALSE	1
	cg05457628-chr5:179131143:SNP	cg05457628	TSS200;TSS200	NM_001040452.3_2;NM_001040451.3_2	RUFY1;RUFY1	Island	chr5	178986728	chr5:179131143:SNP	rs12374446	144415	-0.157108	0.0088337	9.22e-71	25228	T	C	0.4849	0.0213	TRUE	32	-------------------?-?----??--------	25.2	41.4604	0.09929	0.0008558	-0.159545	0.0106451	8.84e-51	0.0118144	2.38e-40	214	FALSE	1
	cg05457628-chr5:179567600:SNP	cg05457628	TSS200;TSS200	NM_001040452.3_2;NM_001040451.3_2	RUFY1;RUFY1	Island	chr5	178986728	chr5:179567600:SNP	rs7731938	580872	-0.117	0.0120984	4.02e-22	22944	T	C	0.1841	0.0274	TRUE	29	-------?-?-----+--?--?--?+??-----++-	29.8	39.8804	0.06777	0.0018335	-0.117245	0.0151439	9.78e-15	0.0172317	1.12e-11	214	FALSE	1
	cg05457628-chr5:178962918:SNP	cg05457628	TSS200;TSS200	NM_001040452.3_2;NM_001040451.3_2	RUFY1;RUFY1	Island	chr5	178986728	chr5:178962918:SNP	rs9885443	23810	0.578222	0.0094348	0	26475	A	G	0.2475	0.015	TRUE	34	+++++++?++++++++++++++++?+++++++++++	48.3	63.8242	0.001012	0.0028643	0.57754	0.0137929	0	0.0182476	2.3e-220	214	FALSE	1
	cg05457628-chr5:178951420:SNP	cg05457628	TSS200;TSS200	NM_001040452.3_2;NM_001040451.3_2	RUFY1;RUFY1	Island	chr5	178986728	chr5:178951420:SNP	rs181597595	35308	-0.21909	0.0232509	4.39e-21	23659	T	A	0.0395	0.0077	TRUE	29	++-?+-+?-+++++++-++++?++?+??+++?++++	41	47.4805	0.01218	0.0110889	-0.214502	0.0319729	1.96e-11	0.0394272	2.75e-08	214	FALSE	1
	cg05457628-chr5:179060382:SNP	cg05457628	TSS200;TSS200	NM_001040452.3_2;NM_001040451.3_2	RUFY1;RUFY1	Island	chr5	178986728	chr5:179060382:SNP	rs12514650	73654	-0.418883	0.0089342	0	23320	T	C	0.4317	0.0197	TRUE	30	-------?-?-----------?--?-?----?----	51.8	60.1139	0.0005978	0.002613	-0.416864	0.0136175	8.39e-206	0.0185196	2.86e-113	214	FALSE	1
	cg05457628-chr5:178903149:SNP	cg05457628	TSS200;TSS200	NM_001040452.3_2;NM_001040451.3_2	RUFY1;RUFY1	Island	chr5	178986728	chr5:178903149:SNP	rs7726821	83579	-0.123975	0.009008	4.27e-43	26214	C	T	0.3541	0.0233	TRUE	33	++++++++++++++++++?+++++?+?+-+++++-+	8.3	34.8796	0.3327	0.0002445	-0.124632	0.0095687	8.83e-39	0.0098186	1.51e-36	214	FALSE	1
	cg05457628-chr5:179568099:SNP	cg05457628	TSS200;TSS200	NM_001040452.3_2;NM_001040451.3_2	RUFY1;RUFY1	Island	chr5	178986728	chr5:179568099:SNP	rs11741286	581371	-0.120183	0.0127813	5.3e-21	20374	C	A	0.186	0.0282	TRUE	26	+++?++??+?++++?-++?++?++?-??+++++--+	36.5	39.3745	0.03378	0.0024963	-0.120108	0.0169906	1.56e-12	0.0201303	2.37e-09	214	FALSE	1
	cg05457628-chr5:178891470:SNP	cg05457628	TSS200;TSS200	NM_001040452.3_2;NM_001040451.3_2	RUFY1;RUFY1	Island	chr5	178986728	chr5:178891470:SNP	rs11249628	95258	0.13223	0.0125492	5.84e-26	27215	T	C	0.1336	0.0137	TRUE	35	++++-++++++-+-+-+++++++-?+++++++++++	6.8	36.4849	0.3539	0.0004092	0.130872	0.0132105	3.9e-23	0.0134664	9.3e-23	214	FALSE	1
	cg05457628-chr5:178962289:SNP	cg05457628	TSS200;TSS200	NM_001040452.3_2;NM_001040451.3_2	RUFY1;RUFY1	Island	chr5	178986728	chr5:178962289:SNP	rs141413749	24439	0.537935	0.0643969	6.63e-17	6780	T	C	0.0197	0.0062	TRUE	11	?++?+?????++?????++??????+?????+??++	0	9.40336	0.4943	0	0.537935	0.0643969	6.63e-17	0.0643969	6.63e-17	214	FALSE	1
	cg05457628-chr5:178891063:SNP	cg05457628	TSS200;TSS200	NM_001040452.3_2;NM_001040451.3_2	RUFY1;RUFY1	Island	chr5	178986728	chr5:178891063:SNP	rs76926113	95665	-0.393292	0.0485985	5.84e-16	11805	A	C	0.0213	0.0063	TRUE	12	---???????-?---?--????-??-?????????+	0	10.9478	0.4476	0	-0.393292	0.0485985	5.84e-16	0.0485985	5.84e-16	214	FALSE	1
	cg05457628-chr5:179038503:SNP	cg05457628	TSS200;TSS200	NM_001040452.3_2;NM_001040451.3_2	RUFY1;RUFY1	Island	chr5	178986728	chr5:179038503:SNP	rs10076293	51775	0.83991	0.0131635	0	9152	C	G	0.3168	0.0158	TRUE	12	+??++??+++??+??+????++??????+???+???	84.2	69.5893	1.462e-10	0.0113526	0.844813	0.0340918	1.45e-135	0.083276	6.38e-24	214	FALSE	1
	cg05457628-chr5:178883318:SNP	cg05457628	TSS200;TSS200	NM_001040452.3_2;NM_001040451.3_2	RUFY1;RUFY1	Island	chr5	178986728	chr5:178883318:SNP	rs72648845	103410	0.150453	0.0127017	2.28e-32	27244	T	C	0.13	0.0147	TRUE	35	++++-++++++-+++-++++++++?++++++++++-	23.5	44.4619	0.1081	0.0017653	0.146952	0.0151415	2.87e-22	0.0166101	1.33e-19	214	FALSE	1
	cg05457628-chr5:179458665:SNP	cg05457628	TSS200;TSS200	NM_001040452.3_2;NM_001040451.3_2	RUFY1;RUFY1	Island	chr5	178986728	chr5:179458665:SNP	rs10479455	471937	-0.12479	0.0087209	1.91e-46	27238	C	T	0.3949	0.0256	TRUE	35	+++++++++++++++--+++++++?+++++++++-+	16.2	40.5669	0.2033	0.0005206	-0.12461	0.009788	3.98e-37	0.0104052	3.87e-33	214	FALSE	1
	cg05457628-chr5:179005934:SNP	cg05457628	TSS200;TSS200	NM_001040452.3_2;NM_001040451.3_2	RUFY1;RUFY1	Island	chr5	178986728	chr5:179005934:SNP	rs79539399	19206	-0.276275	0.0122547	1.52e-112	27702	T	C	0.1413	0.0224	TRUE	36	------------------------------------	23.1	45.4908	0.1103	0.0016413	-0.274068	0.0144747	5.95e-80	0.0159279	2.14e-67	214	FALSE	1
	cg05457628-chr5:179050188:SNP	cg05457628	TSS200;TSS200	NM_001040452.3_2;NM_001040451.3_2	RUFY1;RUFY1	Island	chr5	178986728	chr5:179050188:SNP	rs1136267	63460	0.786613	0.0076814	0	27142	C	A	0.3443	0.0189	TRUE	35	--------------------------?---------	72.8	125.051	2.439e-12	0.0055988	0.785483	0.0154345	0	0.0282521	1.32e-170	214	FALSE	1
	cg05457628-chr5:179576435:SNP	cg05457628	TSS200;TSS200	NM_001040452.3_2;NM_001040451.3_2	RUFY1;RUFY1	Island	chr5	178986728	chr5:179576435:SNP	rs62406063	589707	-0.110761	0.0134641	1.93e-16	18754	G	T	0.1849	0.0287	TRUE	23	+++?++????++++??++?+??++?-??+++++--+	31	31.8623	0.07977	0.0019136	-0.11071	0.0170748	8.94e-11	0.0194998	1.35e-08	214	FALSE	1
	cg05457628-chr5:179179585:SNP	cg05457628	TSS200;TSS200	NM_001040452.3_2;NM_001040451.3_2	RUFY1;RUFY1	Island	chr5	178986728	chr5:179179585:SNP	rs6867806	192857	0.171641	0.0096049	2.02e-71	21553	G	C	0.4281	0.0182	TRUE	28	------??-?------+--?-?--?-?----?----	36.9	42.7841	0.0275	0.0015411	0.174516	0.0128	2.51e-42	0.0152199	1.7e-29	214	FALSE	1
	cg05457628-chr5:178889013:SNP	cg05457628	TSS200;TSS200	NM_001040452.3_2;NM_001040451.3_2	RUFY1;RUFY1	Island	chr5	178986728	chr5:178889013:SNP	rs12658148	97715	0.133854	0.0125604	1.62e-26	27210	G	A	0.1334	0.0139	TRUE	35	----+------+-+-+-------+?-----------	6.2	36.259	0.3637	0.0003726	0.132645	0.0131658	7.13e-24	0.0133949	1.64e-23	214	FALSE	1
	cg05457628-chr5:178949561:SNP	cg05457628	TSS200;TSS200	NM_001040452.3_2;NM_001040451.3_2	RUFY1;RUFY1	Island	chr5	178986728	chr5:178949561:SNP	rs28408527	37167	0.374787	0.0166998	1.51e-111	9047	G	T	0.2645	0.0203	TRUE	12	?--???-???--?-??--????-??-????????--	79.9	54.6653	8.923e-08	0.0143313	0.388413	0.0413533	5.86e-21	0.0829909	6.3e-06	214	FALSE	1
	cg05457628-chr5:179041348:INDEL	cg05457628	TSS200;TSS200	NM_001040452.3_2;NM_001040451.3_2	RUFY1;RUFY1	Island	chr5	178986728	chr5:179041348:INDEL	chr5.179041348	54620	0.753131	0.0106034	0	15361	I	D	0.3245	0.0149	TRUE	19	?--??--???--?--?----??--?-????-??---	45.2	32.8597	0.01735	0.0018215	0.748906	0.0154055	0	0.0193569	0	214	FALSE	1
	cg05457628-chr5:178891821:SNP	cg05457628	TSS200;TSS200	NM_001040452.3_2;NM_001040451.3_2	RUFY1;RUFY1	Island	chr5	178986728	chr5:178891821:SNP	rs10440796	94907	0.356036	0.0269134	5.97e-40	10680	A	G	0.0704	0.0132	TRUE	17	+++?+???+?++?+?+++???????+??+??++?++	18.1	19.5302	0.2421	0.0027881	0.35633	0.0307072	3.93e-31	0.0328515	2.28e-27	214	FALSE	1
	cg05457628-chr5:178951413:SNP	cg05457628	TSS200;TSS200	NM_001040452.3_2;NM_001040451.3_2	RUFY1;RUFY1	Island	chr5	178986728	chr5:178951413:SNP	rs189271397	35315	-0.307472	0.0264098	2.51e-31	15589	T	C	0.0594	0.0265	TRUE	19	---?-?????----??---???-??-???----?--	0	13.2417	0.777	0	-0.307472	0.0264098	2.51e-31	0.0264098	2.51e-31	214	FALSE	1
	cg05457628-chr5:178871862:SNP	cg05457628	TSS200;TSS200	NM_001040452.3_2;NM_001040451.3_2	RUFY1;RUFY1	Island	chr5	178986728	chr5:178871862:SNP	rs58613597	114866	-0.25726	0.0127869	5.02e-90	21320	C	T	0.1734	0.035	TRUE	27	+++++++?+?++++++++????++?+??++++++++	22.7	33.6163	0.145	0.0013167	-0.257298	0.0151383	8.72e-65	0.0165326	1.34e-54	214	FALSE	1
	cg05457628-chr5:179051009:SNP	cg05457628	TSS200;TSS200	NM_001040452.3_2;NM_001040451.3_2	RUFY1;RUFY1	Island	chr5	178986728	chr5:179051009:SNP	rs78375912	64281	-0.390024	0.0349104	5.58e-29	8084	C	G	0.0588	0.0178	TRUE	12	---???????--?-??+-???????-??????-?--	51	22.4416	0.02117	0.0158377	-0.382352	0.053583	9.63e-13	0.0712224	4.35e-08	214	FALSE	1
	cg05457628-chr5:179007553:INDEL	cg05457628	TSS200;TSS200	NM_001040452.3_2;NM_001040451.3_2	RUFY1;RUFY1	Island	chr5	178986728	chr5:179007553:INDEL	chr5.179007553	20825	0.832509	0.0104571	0	16751	D	I	0.2734	0.0227	TRUE	21	?++??++???++?++?++++??++?+?+?++??+++	61.7	52.2707	0.000104	0.0038129	0.821978	0.01817	0	0.0273299	8.44e-204	214	FALSE	1
	cg05457628-chr5:179038877:SNP	cg05457628	TSS200;TSS200	NM_001040452.3_2;NM_001040451.3_2	RUFY1;RUFY1	Island	chr5	178986728	chr5:179038877:SNP	rs4128628	52149	-0.426036	0.0082595	0	27126	T	C	0.4367	0.027	TRUE	35	--------------------------?---------	57.1	79.1874	1.82e-05	0.0032154	-0.426279	0.01328	4.5e-226	0.0192368	1.12e-108	214	FALSE	1
	cg05457628-chr5:178935685:SNP	cg05457628	TSS200;TSS200	NM_001040452.3_2;NM_001040451.3_2	RUFY1;RUFY1	Island	chr5	178986728	chr5:178935685:SNP	rs6868960	51043	0.406904	0.036104	1.84e-29	6586	C	T	0.0629	0.0109	TRUE	11	?--?-?????--?-???-???????-?????-??--	45.7	18.4284	0.04815	0.0124332	0.413905	0.0514445	8.58e-16	0.066534	9.61e-10	214	FALSE	1
	cg05457628-chr5:179057454:SNP	cg05457628	TSS200;TSS200	NM_001040452.3_2;NM_001040451.3_2	RUFY1;RUFY1	Island	chr5	178986728	chr5:179057454:SNP	rs79887241	70726	-0.270988	0.0143634	2.15e-79	26088	A	T	0.1082	0.0209	TRUE	33	----?-------------------?-?---------	0	26.2913	0.7506	0	-0.270988	0.0143634	2.15e-79	0.0143634	2.15e-79	214	FALSE	1
	cg05457628-chr5:178966274:SNP	cg05457628	TSS200;TSS200	NM_001040452.3_2;NM_001040451.3_2	RUFY1;RUFY1	Island	chr5	178986728	chr5:178966274:SNP	rs4701192	20454	0.655806	0.0085681	0	26448	T	C	0.2999	0.0192	TRUE	34	+++++++?++++++++++++++++?+++++++++++	61.8	86.3129	1.177e-06	0.004086	0.652717	0.0145862	0	0.0224102	3.01e-188	214	FALSE	1
	cg05457628-chr5:179052660:INDEL	cg05457628	TSS200;TSS200	NM_001040452.3_2;NM_001040451.3_2	RUFY1;RUFY1	Island	chr5	178986728	chr5:179052660:INDEL	chr5.179052660	65932	-0.422123	0.0104669	0	16769	D	I	0.4352	0.0268	TRUE	21	?--??--???--?--?----??--?-?-?--??---	53.8	43.3356	0.001845	0.0027564	-0.419202	0.0164592	4.33e-143	0.0226795	2.54e-77	214	FALSE	1
	cg05457628-chr5:179269556:SNP	cg05457628	TSS200;TSS200	NM_001040452.3_2;NM_001040451.3_2	RUFY1;RUFY1	Island	chr5	178986728	chr5:179269556:SNP	rs1684974	282828	-0.138771	0.0089229	1.54e-54	24997	T	C	0.5163	0.0302	TRUE	33	-------?-?-----++-------?-----------	14.1	37.2416	0.2404	0.0004369	-0.140037	0.0098897	1.62e-45	0.0103845	9.91e-41	214	FALSE	1
	cg05457628-chr5:179035281:SNP	cg05457628	TSS200;TSS200	NM_001040452.3_2;NM_001040451.3_2	RUFY1;RUFY1	Island	chr5	178986728	chr5:179035281:SNP	rs34155714	48553	0.62217	0.0145558	0	27138	C	A	0.0918	0.0089	TRUE	35	--------------------------?---------	45.6	62.494	0.00206	0.0062927	0.622928	0.0207724	1.4e-197	0.0267545	1.27e-119	214	FALSE	1
	cg05457628-chr5:178996842:SNP	cg05457628	TSS200;TSS200	NM_001040452.3_2;NM_001040451.3_2	RUFY1;RUFY1	Island	chr5	178986728	chr5:178996842:SNP	rs10064557	10114	0.517764	0.0081393	0	27740	C	T	0.3849	0.0225	TRUE	36	------------------------------------	63.7	96.2899	1.248e-07	0.0042304	0.514694	0.0141937	0.00000000000000000000000000000000000000000000000000000000000000000000000000000000000000000000000000000000000000000000000000000000000000000000000000000000000000000000000000000000000000000000000000000000000000000000000000000000000000000000000000000000000000000000000000000000000000000000000638	0.0223923	2.76e-118	214	FALSE	1
	cg05457628-chr5:178893043:SNP	cg05457628	TSS200;TSS200	NM_001040452.3_2;NM_001040451.3_2	RUFY1;RUFY1	Island	chr5	178986728	chr5:178893043:SNP	rs4535440	93685	0.130908	0.0126448	4.07e-25	26603	A	G	0.1343	0.0137	TRUE	34	++++-++++++-+-+-+++++++-?+?+++++++++	10.4	36.8365	0.2958	0.0006423	0.128968	0.0136711	3.96e-21	0.0141149	1.79e-20	214	FALSE	1
	cg05457628-chr5:178969866:INDEL	cg05457628	TSS200;TSS200	NM_001040452.3_2;NM_001040451.3_2	RUFY1;RUFY1	Island	chr5	178986728	chr5:178969866:INDEL	chr5.178969866	16862	0.647796	0.0111132	0	16086	I	D	0.2965	0.0199	TRUE	20	?--??--???--?--?----??--?-???--??---	44.4	34.1778	0.01751	0.0020302	0.640418	0.0159285	0	0.0199908	2.36e-230	214	FALSE	1
	cg05457628-chr5:178997268:SNP	cg05457628	TSS200;TSS200	NM_001040452.3_2;NM_001040451.3_2	RUFY1;RUFY1	Island	chr5	178986728	chr5:178997268:SNP	rs4075891	10540	0.517761	0.0081401	0	27739	G	A	0.3849	0.0225	TRUE	36	------------------------------------	63.6	96.2252	1.275e-07	0.0042269	0.514704	0.0141912	0.00000000000000000000000000000000000000000000000000000000000000000000000000000000000000000000000000000000000000000000000000000000000000000000000000000000000000000000000000000000000000000000000000000000000000000000000000000000000000000000000000000000000000000000000000000000000000000000000495	0.0223796	2.04e-118	214	FALSE	1
	cg05457628-chr5:178890211:SNP	cg05457628	TSS200;TSS200	NM_001040452.3_2;NM_001040451.3_2	RUFY1;RUFY1	Island	chr5	178986728	chr5:178890211:SNP	rs10440794	96517	0.357736	0.0269178	2.65e-40	10681	T	C	0.0703	0.0133	TRUE	17	+++?+???+?++?+?+++???????+??+??++?++	18.6	19.6447	0.2367	0.0028794	0.358064	0.0308209	3.36e-31	0.0330496	2.64e-27	214	FALSE	1
	cg05457628-chr5:178891815:SNP	cg05457628	TSS200;TSS200	NM_001040452.3_2;NM_001040451.3_2	RUFY1;RUFY1	Island	chr5	178986728	chr5:178891815:SNP	rs28812002	94913	-0.261851	0.0120571	1.4e-104	23955	T	C	0.1733	0.0299	TRUE	31	-------?-?--------?-----?-?---------	18.9	36.9863	0.1775	0.0010646	-0.2607	0.0138222	2.39e-79	0.0148649	1.88e-69	214	FALSE	1
	cg05457628-chr5:179442524:INDEL	cg05457628	TSS200;TSS200	NM_001040452.3_2;NM_001040451.3_2	RUFY1;RUFY1	Island	chr5	178986728	chr5:179442524:INDEL	chr5.179442524	455796	-0.125863	0.0112342	3.92e-29	16759	I	D	0.3852	0.0295	TRUE	21	?++??++???++?++?-+++??++?+?+?++??+-+	30.6	28.8014	0.09174	0.0011961	-0.123123	0.0141869	4.01e-18	0.016178	7.26e-15	214	FALSE	1
	cg05457628-chr5:178907212:SNP	cg05457628	TSS200;TSS200	NM_001040452.3_2;NM_001040451.3_2	RUFY1;RUFY1	Island	chr5	178986728	chr5:178907212:SNP	rs13166033	79516	-0.168802	0.0103062	2.72e-60	23953	T	C	0.2611	0.0211	TRUE	31	-------?-?--------?-----?-?---------	47.5	57.0978	0.002038	0.0030237	-0.166721	0.0150519	1.63e-28	0.0196155	7.59e-18	214	FALSE	1
	cg05457628-chr5:178794699:SNP	cg05457628	TSS200;TSS200	NM_001040452.3_2;NM_001040451.3_2	RUFY1;RUFY1	Island	chr5	178986728	chr5:178794699:SNP	rs194249	192029	-0.172847	0.0164077	5.99e-26	10078	C	T	0.2318	0.0213	TRUE	15	?++?+???+?++?+?+++????+??+??+?????++	0	10.9585	0.6893	0	-0.172847	0.0164077	5.99e-26	0.0164077	5.99e-26	214	FALSE	1
	cg05457628-chr5:178944680:SNP	cg05457628	TSS200;TSS200	NM_001040452.3_2;NM_001040451.3_2	RUFY1;RUFY1	Island	chr5	178986728	chr5:178944680:SNP	rs73343169	42048	0.26774	0.0131517	3.96e-92	24362	C	T	0.1386	0.0118	TRUE	30	---?---?-------+-----?--?-??--------	51.8	60.1448	0.0005925	0.0056529	0.268601	0.019991	3.72e-41	0.0272761	9.61e-23	214	FALSE	1
	cg05457628-chr5:179002092:SNP	cg05457628	TSS200;TSS200	NM_001040452.3_2;NM_001040451.3_2	RUFY1;RUFY1	Island	chr5	178986728	chr5:179002092:SNP	rs56198018	15364	-0.596323	0.0080407	0	27206	A	G	0.3858	0.0181	TRUE	35	------------------------?-----------	69.9	112.852	2.18e-10	0.0053166	-0.594996	0.0153933	0	0.0266884	1.38e-110	214	FALSE	1
	cg05457628-chr5:178892121:SNP	cg05457628	TSS200;TSS200	NM_001040452.3_2;NM_001040451.3_2	RUFY1;RUFY1	Island	chr5	178986728	chr5:178892121:SNP	rs12652002	94607	0.13293	0.0125421	3.02e-26	27214	C	T	0.1337	0.0136	TRUE	35	----+------+-+-+-------+?-----------	7	36.5741	0.3501	0.0004234	0.131537	0.0132254	2.63e-23	0.0134916	6.67e-23	214	FALSE	1
	cg05457628-chr5:178879221:SNP	cg05457628	TSS200;TSS200	NM_001040452.3_2;NM_001040451.3_2	RUFY1;RUFY1	Island	chr5	178986728	chr5:178879221:SNP	rs1574358	107507	0.16524	0.0130119	5.98e-37	26526	G	C	0.1262	0.0137	TRUE	34	----+------+---+----?--+?-----------	17.2	39.8657	0.1912	0.0012183	0.16259	0.0148152	5.07e-28	0.0157191	7.6e-26	214	FALSE	1
	cg05457628-chr5:178944294:SNP	cg05457628	TSS200;TSS200	NM_001040452.3_2;NM_001040451.3_2	RUFY1;RUFY1	Island	chr5	178986728	chr5:178944294:SNP	rs62395215	42434	0.274489	0.0113435	2.34e-129	15595	A	C	0.388	0.0141	TRUE	19	?++??++???++?++?++++??+??+???++??+++	64.4	50.5235	6.288e-05	0.0045593	0.2679	0.0204638	3.69e-39	0.0318397	6.64e-18	214	FALSE	1
	cg05457628-chr5:179040704:INDEL	cg05457628	TSS200;TSS200	NM_001040452.3_2;NM_001040451.3_2	RUFY1;RUFY1	Island	chr5	178986728	chr5:179040704:INDEL	chr5.179040704	53976	0.620175	0.0161484	0.000000000000000000000000000000000000000000000000000000000000000000000000000000000000000000000000000000000000000000000000000000000000000000000000000000000000000000000000000000000000000000000000000000000000000000000000000000000000000000000000000000000000000000000000000000000000000000000000000000000000000000000000000000000108694442085074	21828	I	D	0.0931	0.0084	TRUE	28	----?--?-?--------------?-?-?--??---	44.5	48.6858	0.00643	0.0059686	0.621665	0.0229896	4.86e-161	0.0291184	1.17e-100	214	FALSE	1
	cg05457628-chr5:178942111:INDEL	cg05457628	TSS200;TSS200	NM_001040452.3_2;NM_001040451.3_2	RUFY1;RUFY1	Island	chr5	178986728	chr5:178942111:INDEL	chr5.178942111	44617	0.159629	0.0171216	1.13e-20	11296	D	I	0.1925	0.0291	TRUE	14	+++???????+-?+??++????+??+??+???+?++	20.7	16.3947	0.2285	0.0011414	0.158188	0.0205285	1.3e-14	0.0215927	1.44e-13	214	FALSE	1
	cg05457628-chr5:178855436:SNP	cg05457628	TSS200;TSS200	NM_001040452.3_2;NM_001040451.3_2	RUFY1;RUFY1	Island	chr5	178986728	chr5:178855436:SNP	rs34536507	131292	-0.253105	0.0276655	5.76e-20	22586	A	G	0.0311	0.0066	TRUE	29	----+-?+----?---+----+--?-???----?++	35.5	43.4327	0.03159	0.0124121	-0.240766	0.0360607	2.44e-11	0.0429138	3.68e-09	214	FALSE	1
	cg05457628-chr5:179072567:SNP	cg05457628	TSS200;TSS200	NM_001040452.3_2;NM_001040451.3_2	RUFY1;RUFY1	Island	chr5	178986728	chr5:179072567:SNP	rs11959704	85839	-0.436918	0.0095485	0	20661	C	T	0.4149	0.0175	TRUE	27	++++++??+?++++++++++??++?+??+++++?++	55.1	57.9077	0.0003184	0.0030875	-0.434028	0.015196	2e-179	0.0212666	8.56e-94	214	FALSE	1
	cg05457628-chr5:179056244:SNP	cg05457628	TSS200;TSS200	NM_001040452.3_2;NM_001040451.3_2	RUFY1;RUFY1	Island	chr5	178986728	chr5:179056244:SNP	rs75076831	69516	-0.416114	0.0088209	0	23879	A	G	0.437	0.0253	TRUE	31	----?--?-?--------------?-?---------	53.1	63.9243	0.0003006	0.0027719	-0.414586	0.0136187	1.51e-203	0.0187957	1.34e-108	214	FALSE	1
	cg05457628-chr5:179002206:SNP	cg05457628	TSS200;TSS200	NM_001040452.3_2;NM_001040451.3_2	RUFY1;RUFY1	Island	chr5	178986728	chr5:179002206:SNP	rs78700484	15478	0.601384	0.0187087	1.05e-226	26624	A	G	0.0557	0.0089	TRUE	34	++++++++++++++++++++++++?+?+++++++++	0	30.5081	0.5918	0	0.601384	0.0187087	1.05e-226	0.0187087	1.05e-226	214	FALSE	1
	cg05457628-chr5:179060529:SNP	cg05457628	TSS200;TSS200	NM_001040452.3_2;NM_001040451.3_2	RUFY1;RUFY1	Island	chr5	178986728	chr5:179060529:SNP	rs113179313	73801	-0.370717	0.0097769	0.0000000000000000000000000000000000000000000000000000000000000000000000000000000000000000000000000000000000000000000000000000000000000000000000000000000000000000000000000000000000000000000000000000000000000000000000000000000000000000000000000000000000000000000000000000000000000000000000000000000000000000000000000132000000016971	20660	A	G	0.3891	0.0217	TRUE	27	------??-?----------??--?-??-----?--	56.1	59.2363	0.0002122	0.0033734	-0.367872	0.0157671	2.12e-120	0.0222749	3.41e-62	214	FALSE	1
	cg05457628-chr5:179417034:SNP	cg05457628	TSS200;TSS200	NM_001040452.3_2;NM_001040451.3_2	RUFY1;RUFY1	Island	chr5	178986728	chr5:179417034:SNP	rs857182	430306	-0.124096	0.008727	6.91e-46	27219	A	G	0.3946	0.0259	TRUE	35	---------------++-------?---------+-	18	41.4579	0.1774	0.000592	-0.123838	0.0099226	9.55e-36	0.0106413	2e-31	214	FALSE	1
	cg05457628-chr5:178911940:SNP	cg05457628	TSS200;TSS200	NM_001040452.3_2;NM_001040451.3_2	RUFY1;RUFY1	Island	chr5	178986728	chr5:178911940:SNP	rs6601041	74788	-0.212216	0.0171722	4.4e-35	18247	G	A	0.1037	0.0122	TRUE	27	+++++?++++++++?-+++?++??++??+??+++++	0	23.2862	0.6167	0	-0.212216	0.0171722	4.4e-35	0.0171722	4.4e-35	214	FALSE	1
	cg05457628-chr5:179507204:SNP	cg05457628	TSS200;TSS200	NM_001040452.3_2;NM_001040451.3_2	RUFY1;RUFY1	Island	chr5	178986728	chr5:179507204:SNP	rs76993498	520476	0.319734	0.0232303	4.22e-43	24634	G	C	0.0418	0.0086	TRUE	31	------??+------------?--?+?-------+-	34.5	45.8311	0.03225	0.0090244	0.316961	0.0306358	4.36e-25	0.035489	2.07e-19	214	FALSE	1
	cg05457628-chr5:178970706:SNP	cg05457628	TSS200;TSS200	NM_001040452.3_2;NM_001040451.3_2	RUFY1;RUFY1	Island	chr5	178986728	chr5:178970706:SNP	rs13185221	16022	0.34611	0.0131666	2.71e-152	26540	T	G	0.1225	0.0094	TRUE	34	++++++++++++++++++++++++?++?++++++++	57.5	77.5631	1.891e-05	0.0080606	0.347604	0.0212677	4.79e-60	0.0309469	4.88e-29	214	FALSE	1
	cg05457628-chr5:179086624:SNP	cg05457628	TSS200;TSS200	NM_001040452.3_2;NM_001040451.3_2	RUFY1;RUFY1	Island	chr5	178986728	chr5:179086624:SNP	rs72824570	99896	-0.293711	0.0173711	3.93e-64	16707	T	C	0.1122	0.0159	TRUE	24	------????--?---?---?-?-?-??-----?--	0	15.5427	0.8741	0	-0.293711	0.0173711	3.93e-64	0.0173711	3.93e-64	214	FALSE	1
	cg05457628-chr5:179128706:SNP	cg05457628	TSS200;TSS200	NM_001040452.3_2;NM_001040451.3_2	RUFY1;RUFY1	Island	chr5	178986728	chr5:179128706:SNP	rs11744662	141978	-0.151818	0.0095402	5.11e-57	21612	G	T	0.4937	0.0216	TRUE	28	++++++??+?+++++++++?+?++?+??++++++++	3.6	27.9948	0.4112	9.58e-05	-0.152316	0.0098061	2.08e-54	0.0098917	3.65e-53	214	FALSE	1
	cg05457628-chr5:179074190:INDEL	cg05457628	TSS200;TSS200	NM_001040452.3_2;NM_001040451.3_2	RUFY1;RUFY1	Island	chr5	178986728	chr5:179074190:INDEL	chr5.179074190	87462	-0.440055	0.0099272	0	19052	I	D	0.4133	0.015	TRUE	25	++++++??+?++?+++++++??++?+??+++?+?++	59.8	59.7276	6.979e-05	0.0037632	-0.434292	0.0167888	1.53e-147	0.0247053	5.69e-71	214	FALSE	1
	cg05457628-chr5:179026192:SNP	cg05457628	TSS200;TSS200	NM_001040452.3_2;NM_001040451.3_2	RUFY1;RUFY1	Island	chr5	178986728	chr5:179026192:SNP	rs4701137	39464	0.0981199	0.0101968	6.42e-22	27257	C	A	0.2359	0.0331	TRUE	35	------+--------+--------?-----------	41.8	58.3838	0.005758	0.0026417	0.101581	0.0139937	3.9e-13	0.0175096	2.1e-08	214	FALSE	1
	cg05457628-chr5:178870815:SNP	cg05457628	TSS200;TSS200	NM_001040452.3_2;NM_001040451.3_2	RUFY1;RUFY1	Island	chr5	178986728	chr5:178870815:SNP	rs12654220	115913	0.241554	0.0351233	6.1e-12	11544	C	T	0.0387	0.0063	TRUE	14	?--????????+?--?---???-??-???---???-	0	8.43752	0.814	0	0.241554	0.0351233	6.1e-12	0.0351233	6.1e-12	214	FALSE	1
	cg05457628-chr5:179082097:SNP	cg05457628	TSS200;TSS200	NM_001040452.3_2;NM_001040451.3_2	RUFY1;RUFY1	Island	chr5	178986728	chr5:179082097:SNP	rs12517588	95369	-0.396399	0.0101482	0	18530	T	A	0.4169	0.0202	TRUE	25	++++++??+?++?+?+++++??++?+??+++++?++	58.9	58.4198	0.0001064	0.0037879	-0.396486	0.0169372	3.44e-121	0.0247024	6e-58	214	FALSE	1
	cg05457628-chr5:179052185:SNP	cg05457628	TSS200;TSS200	NM_001040452.3_2;NM_001040451.3_2	RUFY1;RUFY1	Island	chr5	178986728	chr5:179052185:SNP	rs6886107	65457	-0.416073	0.0103256	0	26741	G	C	0.2141	0.0257	TRUE	34	++++?+++++++++++++++++++?+++++++++++	24.3	43.5845	0.1029	0.0011782	-0.41682	0.0123119	3.06e-251	0.0136374	1.94e-204	214	FALSE	1
	cg05457628-chr5:178974649:SNP	cg05457628	TSS200;TSS200	NM_001040452.3_2;NM_001040451.3_2	RUFY1;RUFY1	Island	chr5	178986728	chr5:178974649:SNP	rs59757520	12079	0.338735	0.0133329	2.17e-142	25790	A	G	0.1228	0.0095	TRUE	33	+++++++?++++++++++++++++?++?++++++++	61.8	83.7719	1.615e-06	0.0096184	0.338814	0.0227551	3.85e-50	0.0349038	2.88e-22	214	FALSE	1
	cg05457628-chr5:179038799:SNP	cg05457628	TSS200;TSS200	NM_001040452.3_2;NM_001040451.3_2	RUFY1;RUFY1	Island	chr5	178986728	chr5:179038799:SNP	rs4128629	52071	-0.426087	0.0082584	0	27127	C	T	0.4368	0.0271	TRUE	35	++++++++++++++++++++++++++?+++++++++	57.2	79.4104	1.7e-05	0.0032303	-0.426337	0.0132966	1.42e-225	0.0192884	3.91e-108	214	FALSE	1
	cg05457628-chr5:179048205:SNP	cg05457628	TSS200;TSS200	NM_001040452.3_2;NM_001040451.3_2	RUFY1;RUFY1	Island	chr5	178986728	chr5:179048205:SNP	rs4701144	61477	-0.464494	0.0133336	0.0000000000000000000000000000000000000000000000000000000000000000000000000000000000000000000000000000000000000000000000000000000000000000000000000000000000000000000000000000000000000000000000000000000000000000000000000000000000000000000000000000000000000000000000000687	27736	C	T	0.111	0.0124	TRUE	36	++++++++++++++++++++++++++++++++++++	0	31.8394	0.6215	0	-0.464494	0.0133336	0.0000000000000000000000000000000000000000000000000000000000000000000000000000000000000000000000000000000000000000000000000000000000000000000000000000000000000000000000000000000000000000000000000000000000000000000000000000000000000000000000000000000000000000000000000687	0.0133336	0.0000000000000000000000000000000000000000000000000000000000000000000000000000000000000000000000000000000000000000000000000000000000000000000000000000000000000000000000000000000000000000000000000000000000000000000000000000000000000000000000000000000000000000000000000687	214	FALSE	1
	cg05457628-chr5:178950761:SNP	cg05457628	TSS200;TSS200	NM_001040452.3_2;NM_001040451.3_2	RUFY1;RUFY1	Island	chr5	178986728	chr5:178950761:SNP	rs1344158	35967	-0.531402	0.0087159	0	22872	A	G	0.4541	0.0135	TRUE	29	-------?-?-----------?-??-??--------	50.4	56.4493	0.001134	0.002277	-0.533332	0.0131035	0	0.0175717	6.66e-201	214	FALSE	1
	cg05457628-chr5:179270614:SNP	cg05457628	TSS200;TSS200	NM_001040452.3_2;NM_001040451.3_2	RUFY1;RUFY1	Island	chr5	178986728	chr5:179270614:SNP	rs183648	283886	0.143877	0.0086912	1.49e-61	26447	G	C	0.4541	0.0274	TRUE	34	-------?-------++-------?-----------	22.9	42.8248	0.1176	0.0007757	0.145057	0.0102835	3.5e-45	0.0112788	2.87e-37	214	FALSE	1
	cg05457628-chr5:179528999:SNP	cg05457628	TSS200;TSS200	NM_001040452.3_2;NM_001040451.3_2	RUFY1;RUFY1	Island	chr5	178986728	chr5:179528999:SNP	rs62405050	542271	-0.120373	0.012529	7.43e-22	23002	T	C	0.1692	0.0266	TRUE	30	-------?-?--------------?+??---?-++-	17.7	35.2209	0.1974	0.0010286	-0.120252	0.0143065	4.26e-17	0.0152166	2.56e-15	214	FALSE	1
	cg05457628-chr5:178758238:SNP	cg05457628	TSS200;TSS200	NM_001040452.3_2;NM_001040451.3_2	RUFY1;RUFY1	Island	chr5	178986728	chr5:178758238:SNP	rs2431434	228490	-0.187644	0.0149874	5.79e-36	12705	G	A	0.2131	0.0266	TRUE	17	+++?+???+?++?+?+++????+??+??+???+?++	0	11.9432	0.7479	0	-0.187644	0.0149874	5.79e-36	0.0149874	5.79e-36	214	FALSE	1
	cg05457628-chr5:178879133:SNP	cg05457628	TSS200;TSS200	NM_001040452.3_2;NM_001040451.3_2	RUFY1;RUFY1	Island	chr5	178986728	chr5:178879133:SNP	rs1574359	107595	0.149575	0.0127147	5.99e-32	27246	T	A	0.1299	0.0147	TRUE	35	----+------+---+-------+?----------+	24.7	45.1689	0.09539	0.0018886	0.145771	0.0152975	1.59e-21	0.0168914	8.36e-19	214	FALSE	1
	cg05457628-chr5:178992605:INDEL	cg05457628	TSS200;TSS200	NM_001040452.3_2;NM_001040451.3_2	RUFY1;RUFY1	Island	chr5	178986728	chr5:178992605:INDEL	chr5.178992605	5877	0.519226	0.0088194	0	23817	D	I	0.3817	0.0222	TRUE	31	+++?+++?+?++++++++++++++?++++++?++++	65.7	87.5694	1.527e-07	0.0047038	0.513923	0.0159167	1.02e-228	0.0257437	1.83e-90	214	FALSE	1
	cg05457628-chr5:178842380:SNP	cg05457628	TSS200;TSS200	NM_001040452.3_2;NM_001040451.3_2	RUFY1;RUFY1	Island	chr5	178986728	chr5:178842380:SNP	rs10903236	144348	0.162106	0.0087484	1.19e-76	26599	A	C	0.4083	0.0274	TRUE	34	++++++++++++++++++++++++?+?+++++++++	18.9	40.7019	0.1676	0.0006158	0.16227	0.0100354	8.24e-59	0.0107902	5.15e-51	214	FALSE	1
	cg05457628-chr5:178969852:SNP	cg05457628	TSS200;TSS200	NM_001040452.3_2;NM_001040451.3_2	RUFY1;RUFY1	Island	chr5	178986728	chr5:178969852:SNP	rs6601046	16876	0.644293	0.0093052	0	23315	C	T	0.2893	0.0278	TRUE	30	-------?-?-----------?--?-?----?----	58.3	69.5583	3.484e-05	0.0036957	0.634813	0.0152765	0	0.0223192	3.08e-183	214	FALSE	1
	cg05457628-chr5:179036433:SNP	cg05457628	TSS200;TSS200	NM_001040452.3_2;NM_001040451.3_2	RUFY1;RUFY1	Island	chr5	178986728	chr5:179036433:SNP	rs17355294	49705	-0.427227	0.0083307	0	26641	A	G	0.4385	0.0271	TRUE	34	------------------------?-?---------	55.7	74.4888	4.816e-05	0.0030071	-0.426802	0.0131961	1.74e-229	0.0188043	2.86e-114	214	FALSE	1
	cg05457628-chr5:179010119:SNP	cg05457628	TSS200;TSS200	NM_001040452.3_2;NM_001040451.3_2	RUFY1;RUFY1	Island	chr5	178986728	chr5:179010119:SNP	rs56071539	23391	0.794129	0.0091935	0	27241	T	C	0.2168	0.0205	TRUE	35	++++++++++++++++++++++++?+++++++++++	67	102.894	7.493e-09	0.0060712	0.791113	0.0167956	0	0.0278224	3.45e-179	214	FALSE	1
	cg05457628-chr5:178887854:SNP	cg05457628	TSS200;TSS200	NM_001040452.3_2;NM_001040451.3_2	RUFY1;RUFY1	Island	chr5	178986728	chr5:178887854:SNP	rs4700822	98874	0.165894	0.0127571	1.16e-38	27733	G	T	0.1259	0.0143	TRUE	36	----+------+---+--------+----------+	17.4	42.3542	0.1834	0.0012504	0.162561	0.0145213	4.33e-29	0.0154376	6.18e-27	214	FALSE	1
	cg05457628-chr5:179104200:SNP	cg05457628	TSS200;TSS200	NM_001040452.3_2;NM_001040451.3_2	RUFY1;RUFY1	Island	chr5	178986728	chr5:179104200:SNP	rs13357533	117472	-0.257025	0.0141196	4.85e-74	9760	G	C	0.4755	0.0254	TRUE	15	+++?+?????++?+??++???????+??+??++?++	13	16.0937	0.3077	0.000462	-0.254555	0.0155578	3.58e-60	0.0162312	1.78e-56	214	FALSE	1
	cg05457628-chr5:178941331:SNP	cg05457628	TSS200;TSS200	NM_001040452.3_2;NM_001040451.3_2	RUFY1;RUFY1	Island	chr5	178986728	chr5:178941331:SNP	rs201707943	45397	-0.401682	0.0316154	5.53e-37	15503	T	C	0.0346	0.0069	TRUE	19	?--???-???--?--?----??--?-???--??---	3.9	18.7225	0.4091	0.0007855	-0.401814	0.0325872	6.21e-35	0.0328844	2.59e-34	214	FALSE	1
	cg05457628-chr5:179093064:SNP	cg05457628	TSS200;TSS200	NM_001040452.3_2;NM_001040451.3_2	RUFY1;RUFY1	Island	chr5	178986728	chr5:179093064:SNP	rs34010121	106336	0.256665	0.0137138	3.67e-78	20326	T	C	0.1498	0.0119	TRUE	29	++++++?+++++?+++++++++?+?+??+++++?++	56.9	64.9251	9.222e-05	0.0072933	0.257172	0.022001	1.45e-31	0.0317989	6.94e-16	214	FALSE	1
	cg05457628-chr5:179034115:SNP	cg05457628	TSS200;TSS200	NM_001040452.3_2;NM_001040451.3_2	RUFY1;RUFY1	Island	chr5	178986728	chr5:179034115:SNP	rs13179241	47387	0.614542	0.01556	0	25122	G	A	0.0885	0.0127	TRUE	32	-------?----------------?-?----?----	33.4	46.5446	0.03609	0.0039422	0.612851	0.0200219	9.29e-206	0.0233624	1.69e-152	214	FALSE	1
	cg05457628-chr5:179031198:SNP	cg05457628	TSS200;TSS200	NM_001040452.3_2;NM_001040451.3_2	RUFY1;RUFY1	Island	chr5	178986728	chr5:179031198:SNP	rs6892309	44470	0.105671	0.0101363	1.91e-25	27738	T	A	0.2322	0.0274	TRUE	36	------------+--+--------------------	15.5	41.4024	0.2114	0.0006847	0.10731	0.0113105	2.36e-21	0.0119905	1.22e-18	214	FALSE	1
	cg05457628-chr5:179051274:SNP	cg05457628	TSS200;TSS200	NM_001040452.3_2;NM_001040451.3_2	RUFY1;RUFY1	Island	chr5	178986728	chr5:179051274:SNP	rs17052462	64546	0.71277	0.0117941	0	25402	A	G	0.1486	0.0115	TRUE	32	++++++?++++++++++++++?++?+?+++++++++	60	77.4992	7.42e-06	0.0067673	0.712437	0.0196677	0.0000000000000000000000000000000000000000000000000000000000000000000000000000000000000000000000000000000000000000000000000000000000000000000000000000000000000000000000000000000000000000000000000000000000000000000000000000000000000000000000000000000000000000000000000000000000000000000000258	0.0294849	4.17e-129	214	FALSE	1
	cg05457628-chr5:178994087:SNP	cg05457628	TSS200;TSS200	NM_001040452.3_2;NM_001040451.3_2	RUFY1;RUFY1	Island	chr5	178986728	chr5:178994087:SNP	rs11958537	7359	-0.593834	0.0080552	0	27187	T	G	0.3843	0.022	TRUE	35	------------------------?-----------	70.7	115.884	7.245e-11	0.0055416	-0.591719	0.0156218	0.0000000000000000000000000000000000000000000000000000000000000000000000000000000000000000000000000000000000000000000000000000000000000000000000000000000000000000000000000000000000000000000000000000000000000000000000000000000000000000000000000000000000000000000000000000000000000000000000000000000000000000000000000596999999977943	0.027455	9.51e-104	214	FALSE	1
	cg05457628-chr5:179064286:SNP	cg05457628	TSS200;TSS200	NM_001040452.3_2;NM_001040451.3_2	RUFY1;RUFY1	Island	chr5	178986728	chr5:179064286:SNP	rs144383413	77558	0.269461	0.0145893	3.62e-76	18599	A	G	0.1448	0.0111	TRUE	24	+++?++??+?++?+++++++??++?+??+++?+?++	58.7	55.6628	0.0001577	0.0074384	0.274758	0.0243811	1.86e-29	0.0353079	2.32e-14	214	FALSE	1
	cg05457628-chr5:178906966:SNP	cg05457628	TSS200;TSS200	NM_001040452.3_2;NM_001040451.3_2	RUFY1;RUFY1	Island	chr5	178986728	chr5:178906966:SNP	rs7729664	79762	-0.158063	0.0102095	4.6e-54	25391	C	A	0.2478	0.0173	TRUE	32	+++++++?++++++++++?+++++?+?+++++++++	49.5	61.3271	0.000939	0.0033128	-0.15751	0.0151939	3.52e-25	0.0201974	5.04e-15	214	FALSE	1
	cg05457628-chr5:178981060:SNP	cg05457628	TSS200;TSS200	NM_001040452.3_2;NM_001040451.3_2	RUFY1;RUFY1	Island	chr5	178986728	chr5:178981060:SNP	rs72822583	5668	-0.416023	0.0254189	3.31e-60	25798	T	C	0.0323	0.008	TRUE	32	-----------+---------?--?-?-?-------	16.1	36.9622	0.2127	0.0040389	-0.42333	0.0286157	1.61e-49	0.0303076	7.03e-43	214	FALSE	1
	cg05457628-chr5:179110429:SNP	cg05457628	TSS200;TSS200	NM_001040452.3_2;NM_001040451.3_2	RUFY1;RUFY1	Island	chr5	178986728	chr5:179110429:SNP	rs62406698	123701	0.227234	0.0098347	4.1e-118	21321	T	C	0.3812	0.0126	TRUE	27	++++++??+++++++++++??++??+??++++?+++	19.8	32.4056	0.1801	0.0006573	0.228123	0.0114483	2.41e-88	0.0122577	1.02e-76	214	FALSE	1
	cg05457628-chr5:178973063:SNP	cg05457628	TSS200;TSS200	NM_001040452.3_2;NM_001040451.3_2	RUFY1;RUFY1	Island	chr5	178986728	chr5:178973063:SNP	rs11749010	13665	0.661796	0.0085531	0	26433	G	A	0.2998	0.0193	TRUE	34	-------?----------------?-----------	59.8	82.1373	4.519e-06	0.0037525	0.658858	0.0142046	0	0.0212888	3.66e-212	214	FALSE	1
	cg05457628-chr5:179554602:SNP	cg05457628	TSS200;TSS200	NM_001040452.3_2;NM_001040451.3_2	RUFY1;RUFY1	Island	chr5	178986728	chr5:179554602:SNP	rs57288534	567874	0.149113	0.0122006	2.38e-34	23723	T	C	0.1755	0.0142	TRUE	31	+++++++?+?++++++++++++++?+??++++++++	0	19.8788	0.9197	0	0.149113	0.0122006	2.38e-34	0.0122006	2.38e-34	214	FALSE	1
	cg05457628-chr5:178992001:INDEL	cg05457628	TSS200;TSS200	NM_001040452.3_2;NM_001040451.3_2	RUFY1;RUFY1	Island	chr5	178986728	chr5:178992001:INDEL	chr5.178992001	5273	-0.467235	0.0178528	5.6e-151	15190	D	I	0.1123	0.0106	TRUE	19	?--??-????--?--?----??--?-?-??-??---	0	11.6504	0.8648	0	-0.467235	0.0178528	5.6e-151	0.0178528	5.6e-151	214	FALSE	1
	cg05457628-chr5:179458847:SNP	cg05457628	TSS200;TSS200	NM_001040452.3_2;NM_001040451.3_2	RUFY1;RUFY1	Island	chr5	178986728	chr5:179458847:SNP	rs55734821	472119	-0.124783	0.0087186	1.84e-46	27248	G	A	0.3948	0.0257	TRUE	35	+++++++++++++++--+++++++?+++++++++-+	16.1	40.5056	0.2052	0.0005155	-0.124608	0.0097767	3.31e-37	0.0103869	3.02e-33	214	FALSE	1
	cg05457628-chr5:179021717:SNP	cg05457628	TSS200;TSS200	NM_001040452.3_2;NM_001040451.3_2	RUFY1;RUFY1	Island	chr5	178986728	chr5:179021717:SNP	rs28526620	34989	0.632654	0.0148017	0	26406	C	A	0.0908	0.0085	TRUE	34	--------------------------?----?----	41	55.8926	0.007668	0.0052368	0.634412	0.0202759	6.59e-215	0.0250698	1.63e-140	214	FALSE	1
	cg05457628-chr5:178948531:SNP	cg05457628	TSS200;TSS200	NM_001040452.3_2;NM_001040451.3_2	RUFY1;RUFY1	Island	chr5	178986728	chr5:178948531:SNP	rs373852431	38197	0.274344	0.0113614	8.02e-129	15595	A	T	0.3879	0.0134	TRUE	19	?++??++???++?++?++++??+??+???++??+++	64.3	50.404	6.556e-05	0.0045577	0.268134	0.0204794	3.62e-39	0.0318144	6.51e-18	214	FALSE	1
	cg05457628-chr5:179159781:SNP	cg05457628	TSS200;TSS200	NM_001040452.3_2;NM_001040451.3_2	RUFY1;RUFY1	Island	chr5	178986728	chr5:179159781:SNP	rs7723450	173053	-0.219524	0.0128132	8.47e-66	25564	C	T	0.1367	0.0112	TRUE	33	+++++++++++++++++++?++++++??++++++++	0	28.0003	0.6693	0	-0.219524	0.0128132	8.47e-66	0.0128132	8.47e-66	214	FALSE	1
	cg05457628-chr5:179284205:SNP	cg05457628	TSS200;TSS200	NM_001040452.3_2;NM_001040451.3_2	RUFY1;RUFY1	Island	chr5	178986728	chr5:179284205:SNP	rs10434803	297477	-0.135	0.0086111	2.16e-55	27218	A	G	0.4504	0.0375	TRUE	35	---------------++-------?-----------	0	27.9972	0.756	0	-0.135	0.0086111	2.16e-55	0.0086111	2.16e-55	214	FALSE	1
	cg05457628-chr5:179563675:SNP	cg05457628	TSS200;TSS200	NM_001040452.3_2;NM_001040451.3_2	RUFY1;RUFY1	Island	chr5	178986728	chr5:179563675:SNP	rs2890347	576947	-0.116041	0.0120562	6.27e-22	22942	T	C	0.1852	0.0269	TRUE	29	-------?-?--------?--?--?+??-----++-	17.4	33.9171	0.2036	0.0009071	-0.116183	0.0137307	2.64e-17	0.014604	1.93e-15	214	FALSE	1
	cg05457628-chr5:179043556:SNP	cg05457628	TSS200;TSS200	NM_001040452.3_2;NM_001040451.3_2	RUFY1;RUFY1	Island	chr5	178986728	chr5:179043556:SNP	rs6890791	56828	-0.447511	0.0362307	4.77e-35	10357	C	T	0.044	0.0202	TRUE	14	?++?+??+?+?+???+-+????+??+??+?????++	41	22.0349	0.05482	0.0136903	-0.469218	0.0523672	3.24e-19	0.0614107	3.17e-13	214	FALSE	1
	cg05457628-chr5:178967126:SNP	cg05457628	TSS200;TSS200	NM_001040452.3_2;NM_001040451.3_2	RUFY1;RUFY1	Island	chr5	178986728	chr5:178967126:SNP	rs13185115	19602	0.65678	0.0085654	0	26448	G	A	0.2999	0.0193	TRUE	34	-------?----------------?-----------	61.7	86.0934	1.264e-06	0.0040665	0.653979	0.0145616	0	0.0223461	7.11e-190	214	FALSE	1
	cg05457628-chr5:178954098:SNP	cg05457628	TSS200;TSS200	NM_001040452.3_2;NM_001040451.3_2	RUFY1;RUFY1	Island	chr5	178986728	chr5:178954098:SNP	rs1044858	32630	0.322511	0.0115828	1.28e-170	23376	C	G	0.193	0.0145	TRUE	30	+++++++?+?+++++++++++?++?+??++++++++	0	23.0622	0.7737	0	0.322511	0.0115828	1.28e-170	0.0115828	1.28e-170	214	FALSE	1
	cg05457628-chr5:179548294:SNP	cg05457628	TSS200;TSS200	NM_001040452.3_2;NM_001040451.3_2	RUFY1;RUFY1	Island	chr5	178986728	chr5:179548294:SNP	rs55667285	561566	0.143958	0.0117649	1.99e-34	25167	T	C	0.1775	0.0135	TRUE	32	+++++++?++++++++++++++++?+??++++++++	0	26.9267	0.6759	0	0.143958	0.0117649	1.99e-34	0.0117649	1.99e-34	214	FALSE	1
	cg05457628-chr5:178949580:SNP	cg05457628	TSS200;TSS200	NM_001040452.3_2;NM_001040451.3_2	RUFY1;RUFY1	Island	chr5	178986728	chr5:178949580:SNP	rs71596435	37148	0.127581	0.0143193	5.12e-19	11519	T	C	0.3172	0.0397	TRUE	17	+++?+?+?+?++++?-?+???????+??+???+?++	36.8	25.3094	0.06455	0.0020681	0.128408	0.0187478	7.43e-12	0.0226509	1.78e-08	214	FALSE	1
	cg05457628-chr5:178988213:INDEL	cg05457628	TSS200;TSS200	NM_001040452.3_2;NM_001040451.3_2	RUFY1;RUFY1	Island	chr5	178986728	chr5:178988213:INDEL	chr5.178988213	1485	0.436061	0.0171766	3.52e-142	6376	D	I	0.4338	0.0142	TRUE	9	+??+????+???+??+????++??????+???+???	77.8	36.0064	1.751e-05	0.0097355	0.441843	0.0380315	3.35e-31	0.0773087	1.7e-08	214	FALSE	1
	cg05457628-chr5:179032054:SNP	cg05457628	TSS200;TSS200	NM_001040452.3_2;NM_001040451.3_2	RUFY1;RUFY1	Island	chr5	178986728	chr5:179032054:SNP	rs77496764	45326	-0.463857	0.0133183	0.0000000000000000000000000000000000000000000000000000000000000000000000000000000000000000000000000000000000000000000000000000000000000000000000000000000000000000000000000000000000000000000000000000000000000000000000000000000000000000000000000000000000000000000000000899	27742	A	T	0.1112	0.012	TRUE	36	------------------------------------	0	33.3967	0.5456	0	-0.463857	0.0133183	0.0000000000000000000000000000000000000000000000000000000000000000000000000000000000000000000000000000000000000000000000000000000000000000000000000000000000000000000000000000000000000000000000000000000000000000000000000000000000000000000000000000000000000000000000000899	0.0133183	0.0000000000000000000000000000000000000000000000000000000000000000000000000000000000000000000000000000000000000000000000000000000000000000000000000000000000000000000000000000000000000000000000000000000000000000000000000000000000000000000000000000000000000000000000000899	214	FALSE	1
	cg05457628-chr5:179214818:SNP	cg05457628	TSS200;TSS200	NM_001040452.3_2;NM_001040451.3_2	RUFY1;RUFY1	Island	chr5	178986728	chr5:179214818:SNP	rs12522926	228090	-0.132509	0.008776	1.64e-51	25743	G	A	0.4852	0.0209	TRUE	33	+++++++++++++++++++?++++?+?+++++++++	0	30.747	0.5299	0	-0.132509	0.008776	1.64e-51	0.008776	1.64e-51	214	FALSE	1
	cg05457628-chr5:179021300:INDEL	cg05457628	TSS200;TSS200	NM_001040452.3_2;NM_001040451.3_2	RUFY1;RUFY1	Island	chr5	178986728	chr5:179021300:INDEL	chr5.179021300	34572	0.447355	0.0265625	1.21e-63	6898	D	I	0.8837	0.0133	TRUE	10	+??++???+???+??+????++??????+???+???	40	15.0101	0.09066	0.0049034	0.459425	0.0357405	8.12e-38	0.0443007	5.63e-24	214	FALSE	1
	cg05457628-chr5:179066891:SNP	cg05457628	TSS200;TSS200	NM_001040452.3_2;NM_001040451.3_2	RUFY1;RUFY1	Island	chr5	178986728	chr5:179066891:SNP	rs12659191	80163	0.359419	0.0158831	2.25e-113	16600	T	C	0.1347	0.0105	TRUE	23	+++?++??+?+-?+?+++++??++?+??++?++?++	53.7	47.4967	0.001264	0.0069167	0.350346	0.0250262	1.58e-44	0.0342907	1.05e-25	214	FALSE	1
	cg05457628-chr5:179403258:SNP	cg05457628	TSS200;TSS200	NM_001040452.3_2;NM_001040451.3_2	RUFY1;RUFY1	Island	chr5	178986728	chr5:179403258:SNP	rs27014	416530	-0.126513	0.0088418	1.94e-46	26469	C	A	0.3968	0.0255	TRUE	34	+++++++?+++++++--+++++++?+++++++++-+	16.7	39.6109	0.1988	0.0005396	-0.126386	0.0099679	7.7e-37	0.0106131	9.26e-33	214	FALSE	1
	cg05457628-chr5:178996746:INDEL	cg05457628	TSS200;TSS200	NM_001040452.3_2;NM_001040451.3_2	RUFY1;RUFY1	Island	chr5	178986728	chr5:178996746:INDEL	chr5.178996746	10018	-0.465715	0.0142115	1.57e-235	24276	D	I	0.1121	0.0118	TRUE	32	-------?-?--------------?------?----	2.7	31.8732	0.4229	0.0001848	-0.466252	0.0145024	8.84e-227	0.0146119	6.45e-223	214	FALSE	1
	cg05457628-chr5:178914436:SNP	cg05457628	TSS200;TSS200	NM_001040452.3_2;NM_001040451.3_2	RUFY1;RUFY1	Island	chr5	178986728	chr5:178914436:SNP	rs4496697	72292	-0.312185	0.0173091	1.02e-72	14092	A	G	0.1391	0.0398	TRUE	19	---?-???-?--?-?---????-??-?--??--?--	10.8	20.188	0.3223	0.0007183	-0.308574	0.0189384	1.1e-59	0.0194132	3.46e-58	214	FALSE	1
	cg05457628-chr5:179284811:SNP	cg05457628	TSS200;TSS200	NM_001040452.3_2;NM_001040451.3_2	RUFY1;RUFY1	Island	chr5	178986728	chr5:179284811:SNP	rs6897669	298083	-0.137704	0.0091125	1.36e-51	24390	A	G	0.4507	0.0404	TRUE	32	-------?-?-----++-------?-?---------	0	28.0378	0.6192	0	-0.137704	0.0091125	1.36e-51	0.0091125	1.36e-51	214	FALSE	1
	cg05457628-chr5:179002300:SNP	cg05457628	TSS200;TSS200	NM_001040452.3_2;NM_001040451.3_2	RUFY1;RUFY1	Island	chr5	178986728	chr5:179002300:SNP	rs72824510	15572	-0.468075	0.0132769	0.000000000000000000000000000000000000000000000000000000000000000000000000000000000000000000000000000000000000000000000000000000000000000000000000000000000000000000000000000000000000000000000000000000000000000000000000000000000000000000000000000000000000000000000000000000029	27710	A	T	0.1119	0.0114	TRUE	36	------------------------------------	0	34.33	0.5003	0	-0.468075	0.0132769	0.000000000000000000000000000000000000000000000000000000000000000000000000000000000000000000000000000000000000000000000000000000000000000000000000000000000000000000000000000000000000000000000000000000000000000000000000000000000000000000000000000000000000000000000000000000029	0.0132769	0.000000000000000000000000000000000000000000000000000000000000000000000000000000000000000000000000000000000000000000000000000000000000000000000000000000000000000000000000000000000000000000000000000000000000000000000000000000000000000000000000000000000000000000000000000000029	214	FALSE	1
	cg05457628-chr5:178892736:SNP	cg05457628	TSS200;TSS200	NM_001040452.3_2;NM_001040451.3_2	RUFY1;RUFY1	Island	chr5	178986728	chr5:178892736:SNP	rs2411382	93992	0.130865	0.0127889	1.42e-24	25843	A	G	0.135	0.0133	TRUE	33	++++-++?+++-+-+-+++++++-?+?+++++++++	10.6	35.7899	0.295	0.0006501	0.128919	0.0138498	1.3e-20	0.0143036	5.74e-20	214	FALSE	1
	cg05457628-chr5:179043041:SNP	cg05457628	TSS200;TSS200	NM_001040452.3_2;NM_001040451.3_2	RUFY1;RUFY1	Island	chr5	178986728	chr5:179043041:SNP	rs4256313	56313	0.77877	0.0092245	0	27131	G	C	0.219	0.021	TRUE	35	--------------------------?---------	64.9	96.7443	6.216e-08	0.0055679	0.77523	0.0163588	0	0.0262475	1.86e-193	214	FALSE	1
	cg05457628-chr5:179014981:SNP	cg05457628	TSS200;TSS200	NM_001040452.3_2;NM_001040451.3_2	RUFY1;RUFY1	Island	chr5	178986728	chr5:179014981:SNP	rs6601054	28253	0.777531	0.0119673	0	22515	T	G	0.1555	0.0156	TRUE	29	++++++??+?+++++++++++?++?+??++++++++	60.5	70.9264	1.38e-05	0.0064695	0.771949	0.0200957	0.0000000000000000000000000000000000000000000000000000000000000000000000000000000000000000000000000000000000000000000000000000000000000000000000000000000000000000000000000000000000000000000000000000000000000000000000000000000000000000000000000000000000000000000000000000000000000000000000000000000000000000000000000000000000790505033345994	0.0303141	4.32e-145	214	FALSE	1
	cg05457628-chr5:179087983:INDEL	cg05457628	TSS200;TSS200	NM_001040452.3_2;NM_001040451.3_2	RUFY1;RUFY1	Island	chr5	178986728	chr5:179087983:INDEL	chr5.179087983	101255	0.165685	0.0169682	1.6e-22	16594	I	D	0.12	0.012	TRUE	24	------??-?-+?--+--?--??-?-??---?-?--	34.9	35.3381	0.04813	0.0037692	0.168438	0.0220365	2.11e-14	0.0260707	2.08e-10	214	FALSE	1
	cg05457628-chr5:179036457:SNP	cg05457628	TSS200;TSS200	NM_001040452.3_2;NM_001040451.3_2	RUFY1;RUFY1	Island	chr5	178986728	chr5:179036457:SNP	rs11541392	49729	0.616773	0.0154724	0	24149	C	G	0.0916	0.0088	TRUE	31	++++?+++++++++?++++++++?++?++?++++++	47.9	57.6356	0.001763	0.0069409	0.618226	0.022684	1.5e-163	0.0297253	1.25e-95	214	FALSE	1
	cg05457628-chr5:178852629:SNP	cg05457628	TSS200;TSS200	NM_001040452.3_2;NM_001040451.3_2	RUFY1;RUFY1	Island	chr5	178986728	chr5:178852629:SNP	rs12658115	134099	0.14885	0.009914	5.93e-51	24815	C	T	0.2908	0.031	TRUE	32	------------------------?-??-----?+-	15	36.4623	0.2296	0.0005633	0.148685	0.0110795	4.63e-41	0.0116608	2.57e-37	214	FALSE	1
	cg05457628-chr5:179055449:SNP	cg05457628	TSS200;TSS200	NM_001040452.3_2;NM_001040451.3_2	RUFY1;RUFY1	Island	chr5	178986728	chr5:179055449:SNP	rs72824554	68721	-0.374608	0.0091027	0	23434	C	G	0.4012	0.0228	TRUE	29	----?-??-------------?--?-??--------	52.7	59.1614	0.0005206	0.0027211	-0.372958	0.0140458	2.38e-155	0.0192331	1.71e-84	214	FALSE	1
	cg05457628-chr5:178952039:SNP	cg05457628	TSS200;TSS200	NM_001040452.3_2;NM_001040451.3_2	RUFY1;RUFY1	Island	chr5	178986728	chr5:178952039:SNP	rs35678620	34689	0.411827	0.0107017	0.00000000000000000000000000000000000000000000000000000000000000000000000000000000000000000000000000000000000000000000000000000000000000000000000000000000000000000000000000000000000000000000000000000000000000000000000000000000000000000000000000000000000000000000000000000000000000000000000000000000000000000000000000000000000494065645841247	24046	T	G	0.2202	0.0166	TRUE	31	+++++++?+?+++++++++++?++?+?+++++++++	6.9	32.2381	0.3565	0.000269	0.411975	0.0112589	0.0000000000000000000000000000000000000000000000000000000000000000000000000000000000000000000000000000000000000000000000000000000000000000000000000000000000000000000000000000000000000000000000000000000000000000000000000000000000000000000000000000000000000000000000000000000000000000000000000000398	0.0115001	0.000000000000000000000000000000000000000000000000000000000000000000000000000000000000000000000000000000000000000000000000000000000000000000000000000000000000000000000000000000000000000000000000000000000000000000000000000000000000000000000000000000000000000000000000000000000000000075	214	FALSE	1
	cg05457628-chr5:179264915:SNP	cg05457628	TSS200;TSS200	NM_001040452.3_2;NM_001040451.3_2	RUFY1;RUFY1	Island	chr5	178986728	chr5:179264915:SNP	rs1065154	278187	0.143567	0.0085588	3.77e-63	27257	G	T	0.4546	0.0262	TRUE	35	---------------++-------?-----------	25	45.323	0.09279	0.0008656	0.144756	0.0102763	4.6e-45	0.0114092	2.6e-36	214	FALSE	1
	cg05457628-chr5:179082160:INDEL	cg05457628	TSS200;TSS200	NM_001040452.3_2;NM_001040451.3_2	RUFY1;RUFY1	Island	chr5	178986728	chr5:179082160:INDEL	chr5.179082160	95432	0.323036	0.0165574	9.01e-85	7915	I	D	0.3361	0.0274	TRUE	14	?--??-????--?-??----???-?-????????--	16.4	15.5437	0.2746	0.0007708	0.322811	0.0185773	1.24e-67	0.0197972	7.44e-60	214	FALSE	1
	cg05457628-chr5:179423519:SNP	cg05457628	TSS200;TSS200	NM_001040452.3_2;NM_001040451.3_2	RUFY1;RUFY1	Island	chr5	178986728	chr5:179423519:SNP	rs248316	436791	-0.123558	0.0087273	1.68e-45	27213	T	C	0.3945	0.026	TRUE	35	---------------++-------?---------+-	17.3	41.1327	0.1866	0.0005662	-0.123325	0.009876	8.75e-36	0.0105581	1.24e-31	214	FALSE	1
	cg05457628-chr5:178884472:SNP	cg05457628	TSS200;TSS200	NM_001040452.3_2;NM_001040451.3_2	RUFY1;RUFY1	Island	chr5	178986728	chr5:178884472:SNP	rs6869058	102256	0.150869	0.0126922	1.39e-32	27254	T	C	0.1302	0.0147	TRUE	35	++++-++++++-+++-++++++++?++++++++++-	23.9	44.6838	0.1039	0.0018	0.14738	0.0151739	2.66e-22	0.0166804	1.5e-19	214	FALSE	1
	cg05457628-chr5:178851357:SNP	cg05457628	TSS200;TSS200	NM_001040452.3_2;NM_001040451.3_2	RUFY1;RUFY1	Island	chr5	178986728	chr5:178851357:SNP	rs2411391	135371	0.161102	0.0154959	2.57e-25	24842	A	G	0.0942	0.0095	TRUE	32	+++++-+++-+++++-++++++++?+??+++++?++	31.3	45.1099	0.04874	0.0035509	0.160022	0.0195559	2.77e-16	0.0225489	9.03e-13	214	FALSE	1
	cg05457628-chr5:179023783:SNP	cg05457628	TSS200;TSS200	NM_001040452.3_2;NM_001040451.3_2	RUFY1;RUFY1	Island	chr5	178986728	chr5:179023783:SNP	rs112105028	37055	-0.268595	0.0141458	2.16e-80	26630	T	G	0.1092	0.0212	TRUE	34	------------------------?-?---------	0	26.4672	0.7825	0	-0.268595	0.0141458	2.16e-80	0.0141458	2.16e-80	214	FALSE	1
	cg05457628-chr5:178961969:SNP	cg05457628	TSS200;TSS200	NM_001040452.3_2;NM_001040451.3_2	RUFY1;RUFY1	Island	chr5	178986728	chr5:178961969:SNP	rs73330320	24759	0.600998	0.0198277	8.22e-202	25950	C	T	0.0507	0.0086	TRUE	33	------------------------?-??--------	14.7	37.5304	0.2304	0.0022783	0.600688	0.0221355	3.62e-162	0.0232545	2.81e-147	214	FALSE	1
	cg05457628-chr5:178850437:SNP	cg05457628	TSS200;TSS200	NM_001040452.3_2;NM_001040451.3_2	RUFY1;RUFY1	Island	chr5	178986728	chr5:178850437:SNP	rs72820694	136291	0.149141	0.0099097	3.45e-51	24829	A	G	0.2905	0.0308	TRUE	32	++++++++++++++++++++++++?+??+++++?-+	15.1	36.4997	0.2283	0.0005667	0.148946	0.0110818	3.5e-41	0.0116678	2.06e-37	214	FALSE	1
	cg05457628-chr5:179032536:SNP	cg05457628	TSS200;TSS200	NM_001040452.3_2;NM_001040451.3_2	RUFY1;RUFY1	Island	chr5	178986728	chr5:179032536:SNP	rs72824529	45808	-0.463477	0.013317	0.000000000000000000000000000000000000000000000000000000000000000000000000000000000000000000000000000000000000000000000000000000000000000000000000000000000000000000000000000000000000000000000000000000000000000000000000000000000000000000000000000000000000000000000000216	27740	G	A	0.1112	0.0119	TRUE	36	++++++++++++++++++++++++++++++++++++	0	33.15	0.5576	0	-0.463477	0.013317	0.000000000000000000000000000000000000000000000000000000000000000000000000000000000000000000000000000000000000000000000000000000000000000000000000000000000000000000000000000000000000000000000000000000000000000000000000000000000000000000000000000000000000000000000000216	0.013317	0.000000000000000000000000000000000000000000000000000000000000000000000000000000000000000000000000000000000000000000000000000000000000000000000000000000000000000000000000000000000000000000000000000000000000000000000000000000000000000000000000000000000000000000000000216	214	FALSE	1
	cg05457628-chr5:178959238:SNP	cg05457628	TSS200;TSS200	NM_001040452.3_2;NM_001040451.3_2	RUFY1;RUFY1	Island	chr5	178986728	chr5:178959238:SNP	rs28583161	27490	0.337006	0.0137269	4.24e-133	23989	G	A	0.1261	0.0112	TRUE	31	-------?-?-----+-----?--?--?--------	59.4	73.831	1.463e-05	0.0086519	0.338649	0.0226787	2.03e-50	0.0337823	1.95e-23	214	FALSE	1
	cg05457628-chr5:178970923:SNP	cg05457628	TSS200;TSS200	NM_001040452.3_2;NM_001040451.3_2	RUFY1;RUFY1	Island	chr5	178986728	chr5:178970923:SNP	rs12520676	15805	0.718027	0.0217187	1.11e-239	22532	G	A	0.0472	0.0064	TRUE	29	-----???-------------?--?--?--?-----	35.2	43.2263	0.03309	0.007563	0.71739	0.028431	1.75e-140	0.0335293	9.7e-102	214	FALSE	1
	cg05457628-chr5:179071809:INDEL	cg05457628	TSS200;TSS200	NM_001040452.3_2;NM_001040451.3_2	RUFY1;RUFY1	Island	chr5	178986728	chr5:179071809:INDEL	chr5.179071809	85081	0.557114	0.0163234	0.00000000000000000000000000000000000000000000000000000000000000000000000000000000000000000000000000000000000000000000000000000000000000000000000000000000000000000000000000000000000000000000000000000000000000000000000000000000000000000000000000000000000000268	20670	D	I	0.0976	0.0062	TRUE	27	++++++??+?+++++++++++?++?+??+++?+?++	44.2	46.625	0.00776	0.0058169	0.558015	0.0231974	7.38e-128	0.0292723	9.25e-81	214	FALSE	1
	cg05457628-chr5:179052263:SNP	cg05457628	TSS200;TSS200	NM_001040452.3_2;NM_001040451.3_2	RUFY1;RUFY1	Island	chr5	178986728	chr5:179052263:SNP	rs6885050	65535	-0.286195	0.0240563	1.23e-32	19681	A	G	0.056	0.0281	TRUE	24	---??-???------+---???--?-??-----?+-	0	21.0422	0.5785	0	-0.286195	0.0240563	1.23e-32	0.0240563	1.23e-32	214	FALSE	1
	cg05457628-chr5:179001200:SNP	cg05457628	TSS200;TSS200	NM_001040452.3_2;NM_001040451.3_2	RUFY1;RUFY1	Island	chr5	178986728	chr5:179001200:SNP	rs9329083	14472	0.517099	0.0081428	0	27732	A	G	0.3846	0.0226	TRUE	36	++++++++++++++++++++++++++++++++++++	63.5	95.9162	1.413e-07	0.0042081	0.513981	0.0141716	0.00000000000000000000000000000000000000000000000000000000000000000000000000000000000000000000000000000000000000000000000000000000000000000000000000000000000000000000000000000000000000000000000000000000000000000000000000000000000000000000000000000000000000000000000000000000000000000000000512	0.022315	8.58e-119	214	FALSE	1
	cg05457628-chr5:179267783:SNP	cg05457628	TSS200;TSS200	NM_001040452.3_2;NM_001040451.3_2	RUFY1;RUFY1	Island	chr5	178986728	chr5:179267783:SNP	rs248247	281055	-0.136595	0.0089261	7.31e-53	26649	A	G	0.3721	0.0378	TRUE	34	---------------++-------?-?-------+-	6.1	35.147	0.3667	0.0001787	-0.137111	0.0093304	6.93e-49	0.0095068	8.2e-47	214	FALSE	1
	cg05457628-chr5:178836580:SNP	cg05457628	TSS200;TSS200	NM_001040452.3_2;NM_001040451.3_2	RUFY1;RUFY1	Island	chr5	178986728	chr5:178836580:SNP	rs12653324	150148	-0.168585	0.0111637	1.59e-51	18601	G	A	0.3032	0.0317	TRUE	24	+++?++??+?++?+++++++??++?+??+++?+?-+	15.9	27.3603	0.2409	0.000582	-0.16614	0.012646	2e-39	0.01328	6.34e-37	214	FALSE	1
	cg05457628-chr5:179043465:SNP	cg05457628	TSS200;TSS200	NM_001040452.3_2;NM_001040451.3_2	RUFY1;RUFY1	Island	chr5	178986728	chr5:179043465:SNP	rs78518762	56737	0.593371	0.0190036	5.02e-214	25408	A	G	0.0568	0.0087	TRUE	32	++++++?++++++++++++++?++?+?+++++++++	0	27.9911	0.6216	0	0.593371	0.0190036	5.02e-214	0.0190036	5.02e-214	214	FALSE	1
	cg05457628-chr5:179273820:SNP	cg05457628	TSS200;TSS200	NM_001040452.3_2;NM_001040451.3_2	RUFY1;RUFY1	Island	chr5	178986728	chr5:179273820:SNP	rs748197	287092	-0.137673	0.0085216	1.03e-58	27750	A	G	0.4481	0.0367	TRUE	36	---------------++-----------------+-	0	32.4872	0.59	0	-0.137673	0.0085216	1.03e-58	0.0085216	1.03e-58	214	FALSE	1
	cg05457628-chr5:178884964:SNP	cg05457628	TSS200;TSS200	NM_001040452.3_2;NM_001040451.3_2	RUFY1;RUFY1	Island	chr5	178986728	chr5:178884964:SNP	rs11949020	101764	0.149627	0.0128249	1.88e-31	26518	G	A	0.1309	0.015	TRUE	34	----+------+---+--------?------?---+	24.2	43.5581	0.1034	0.0018196	0.146705	0.015391	1.55e-21	0.0169281	9.66e-19	214	FALSE	1
	cg05457628-chr5:179427400:SNP	cg05457628	TSS200;TSS200	NM_001040452.3_2;NM_001040451.3_2	RUFY1;RUFY1	Island	chr5	178986728	chr5:179427400:SNP	rs449511	440672	-0.123663	0.0087272	1.41e-45	27222	G	A	0.3942	0.0258	TRUE	35	+++++++++++++++--+++++++?+++++++++-+	16.1	40.5344	0.2043	0.0005187	-0.123447	0.0097894	1.85e-36	0.0104044	1.41e-32	214	FALSE	1
	cg05457628-chr5:179262108:SNP	cg05457628	TSS200;TSS200	NM_001040452.3_2;NM_001040451.3_2	RUFY1;RUFY1	Island	chr5	178986728	chr5:179262108:SNP	rs173561	275380	-0.136841	0.0090468	1.09e-51	24274	T	C	0.5184	0.0294	TRUE	32	-------?-?-----++-------?------?----	15.7	36.7846	0.2186	0.0004966	-0.13813	0.0101561	3.97e-42	0.0107349	3.23e-37	214	FALSE	1
	cg05457628-chr5:178993660:SNP	cg05457628	TSS200;TSS200	NM_001040452.3_2;NM_001040451.3_2	RUFY1;RUFY1	Island	chr5	178986728	chr5:178993660:SNP	rs11249645	6932	0.517909	0.0081399	0	27745	C	T	0.3848	0.0224	TRUE	36	------------------------------------	63.4	95.752	1.492e-07	0.004194	0.515039	0.0141557	0.0000000000000000000000000000000000000000000000000000000000000000000000000000000000000000000000000000000000000000000000000000000000000000000000000000000000000000000000000000000000000000000000000000000000000000000000000000000000000000000000000000000000000000000000000000000000000000000000000763	0.0222689	1.21e-119	214	FALSE	1
	cg05457628-chr5:179113488:SNP	cg05457628	TSS200;TSS200	NM_001040452.3_2;NM_001040451.3_2	RUFY1;RUFY1	Island	chr5	178986728	chr5:179113488:SNP	rs12188238	126760	0.222364	0.0091222	3.06e-131	23947	G	A	0.4137	0.0144	TRUE	30	-------?------------?--??-??--------	11.6	32.7922	0.2862	0.000332	0.223021	0.0099405	1.77e-111	0.010315	4.52e-103	214	FALSE	1
	cg05457628-chr5:178912412:SNP	cg05457628	TSS200;TSS200	NM_001040452.3_2;NM_001040451.3_2	RUFY1;RUFY1	Island	chr5	178986728	chr5:178912412:SNP	rs4701177	74316	-0.212081	0.0191449	1.61e-28	15377	C	T	0.0992	0.0142	TRUE	23	+++?+?+?+?++++?-++++????++??+??+++++	0	17.6293	0.7277	0	-0.212081	0.0191449	1.61e-28	0.0191449	1.61e-28	214	FALSE	1
	cg05457628-chr5:178968318:SNP	cg05457628	TSS200;TSS200	NM_001040452.3_2;NM_001040451.3_2	RUFY1;RUFY1	Island	chr5	178986728	chr5:178968318:SNP	rs182860124	18410	-0.292477	0.024718	2.65e-32	15353	C	T	0.0688	0.0329	TRUE	19	+++?+?????++++??+++???+??+??+++?+?-+	0	16.261	0.5743	0	-0.292477	0.024718	2.65e-32	0.024718	2.65e-32	214	FALSE	1
	cg05457628-chr5:178890553:SNP	cg05457628	TSS200;TSS200	NM_001040452.3_2;NM_001040451.3_2	RUFY1;RUFY1	Island	chr5	178986728	chr5:178890553:SNP	rs4282300	96175	0.134427	0.0133498	7.53e-24	23323	T	C	0.138	0.0134	TRUE	30	++++-++?+?+-+-+-++++??+-?+?+++++++++	24	38.1777	0.1184	0.0017243	0.129209	0.0159923	6.51e-16	0.0175747	2.03e-14	214	FALSE	1
	cg05457628-chr5:179040113:SNP	cg05457628	TSS200;TSS200	NM_001040452.3_2;NM_001040451.3_2	RUFY1;RUFY1	Island	chr5	178986728	chr5:179040113:SNP	rs12518041	53385	-0.429319	0.0082394	0	27136	G	T	0.4399	0.0218	TRUE	35	++++++++++++++++++++++++++?+++++++++	51.1	69.538	0.0003088	0.0025161	-0.430334	0.0124093	0.0000000000000000000000000000000000000000000000000000000000000000000000000000000000000000000000000000000000000000000000000000000000000000000000000000000000000000000000000000000000000000000000000000000000000000000000000000000000000000000000000000000000000000000000167	0.0168514	3.57e-143	214	FALSE	1
	cg05457628-chr5:178969147:SNP	cg05457628	TSS200;TSS200	NM_001040452.3_2;NM_001040451.3_2	RUFY1;RUFY1	Island	chr5	178986728	chr5:178969147:SNP	rs9286047	17581	0.727406	0.0076355	0	26443	C	A	0.4231	0.0202	TRUE	34	-------?----------------?-----------	72.5	119.886	8.584e-12	0.0052864	0.725044	0.0152728	0	0.0277388	1.44e-151	214	FALSE	1
	cg05457628-chr5:179058175:INDEL	cg05457628	TSS200;TSS200	NM_001040452.3_2;NM_001040451.3_2	RUFY1;RUFY1	Island	chr5	178986728	chr5:179058175:INDEL	chr5.179058175	71447	0.427858	0.0298234	1.12e-46	6096	D	I	0.895	0.0179	TRUE	8	+???+???+???+??+????+???????+???+???	15	8.23163	0.3126	0.001328	0.43244	0.0332689	1.25e-38	0.0350707	3.11e-34	214	FALSE	1
	cg05457628-chr5:178850787:SNP	cg05457628	TSS200;TSS200	NM_001040452.3_2;NM_001040451.3_2	RUFY1;RUFY1	Island	chr5	178986728	chr5:178850787:SNP	rs7726663	135941	0.161102	0.0154974	2.6e-25	24841	T	C	0.0942	0.0095	TRUE	32	+++++-+++-+++++-++++++++?+??+++++?++	31.3	45.1318	0.04852	0.0035571	0.160009	0.0195627	2.86e-16	0.0225621	9.31e-13	214	FALSE	1
	cg05457628-chr5:179150349:SNP	cg05457628	TSS200;TSS200	NM_001040452.3_2;NM_001040451.3_2	RUFY1;RUFY1	Island	chr5	178986728	chr5:179150349:SNP	rs71613416	163621	-0.220253	0.0129622	9.42e-65	25079	C	T	0.1362	0.0113	TRUE	32	+++++++++++++++++++?++++?+??++++++++	0	27.9549	0.6235	0	-0.220253	0.0129622	9.42e-65	0.0129622	9.42e-65	214	FALSE	1
	cg05457628-chr5:178908265:SNP	cg05457628	TSS200;TSS200	NM_001040452.3_2;NM_001040451.3_2	RUFY1;RUFY1	Island	chr5	178986728	chr5:178908265:SNP	rs4700830	78463	-0.157814	0.0102212	8.84e-54	25390	T	C	0.2473	0.0175	TRUE	32	-------?----------?-----?-?---------	50.3	62.3195	0.000713	0.0034294	-0.157565	0.0153405	9.5e-25	0.0205478	1.59e-14	214	FALSE	1
	cg05457628-chr5:178882162:SNP	cg05457628	TSS200;TSS200	NM_001040452.3_2;NM_001040451.3_2	RUFY1;RUFY1	Island	chr5	178986728	chr5:178882162:SNP	rs12657583	104566	0.149984	0.0127154	4.12e-32	27242	C	T	0.1301	0.0151	TRUE	35	----+------+---+--------?----------+	22.9	44.1095	0.1149	0.0017097	0.146632	0.0150889	2.53e-22	0.0164962	9.72e-20	214	FALSE	1
	cg05457628-chr5:178974581:SNP	cg05457628	TSS200;TSS200	NM_001040452.3_2;NM_001040451.3_2	RUFY1;RUFY1	Island	chr5	178986728	chr5:178974581:SNP	rs6879665	12147	0.699975	0.0088457	0	24997	A	T	0.2848	0.0178	TRUE	33	+++++++?+?++++++++++++++?+++++++++++	62	84.1742	1.416e-06	0.0042702	0.695101	0.0151091	0	0.0232682	8.11e-199	214	FALSE	1
	cg05457628-chr5:178948527:SNP	cg05457628	TSS200;TSS200	NM_001040452.3_2;NM_001040451.3_2	RUFY1;RUFY1	Island	chr5	178986728	chr5:178948527:SNP	rs370007851	38201	0.272645	0.01135	1.65e-127	15592	A	T	0.3918	0.0139	TRUE	19	?++??++???++?++?++++??+??+???++??+++	63.4	49.141	0.0001017	0.0043707	0.266169	0.0202021	1.22e-39	0.0309861	1.38e-18	214	FALSE	1
	cg05457628-chr5:178935665:SNP	cg05457628	TSS200;TSS200	NM_001040452.3_2;NM_001040451.3_2	RUFY1;RUFY1	Island	chr5	178986728	chr5:178935665:SNP	rs6864599	51063	0.400314	0.0153087	9.99e-151	20353	G	A	0.1144	0.0152	TRUE	29	------?-----?---------?-?-??-----?--	0	27.1966	0.5076	0	0.400314	0.0153087	9.99e-151	0.0153087	9.99e-151	214	FALSE	1
	cg05457628-chr5:179359216:INDEL	cg05457628	TSS200;TSS200	NM_001040452.3_2;NM_001040451.3_2	RUFY1;RUFY1	Island	chr5	178986728	chr5:179359216:INDEL	chr5.179359216	372488	-0.1182	0.010073	8.5e-32	23664	D	I	0.2928	0.027	TRUE	31	-------?-?-------+------?-?----?----	25.7	40.3997	0.09735	0.001107	-0.117614	0.0121662	4.15e-22	0.0135649	2.94e-18	214	FALSE	1
	cg05457628-chr5:179258790:INDEL	cg05457628	TSS200;TSS200	NM_001040452.3_2;NM_001040451.3_2	RUFY1;RUFY1	Island	chr5	178986728	chr5:179258790:INDEL	chr5.179258790	272062	-0.13658	0.0111863	2.77e-34	15898	I	D	0.5278	0.0276	TRUE	20	?++??+????++?++?-+++??++?+?+?++??+++	18.2	23.2263	0.2275	0.000574	-0.138795	0.0128831	4.6e-27	0.0136746	1.72e-23	214	FALSE	1
	cg05457628-chr5:178949560:SNP	cg05457628	TSS200;TSS200	NM_001040452.3_2;NM_001040451.3_2	RUFY1;RUFY1	Island	chr5	178986728	chr5:178949560:SNP	rs28413987	37168	0.374787	0.0166998	1.51e-111	9047	A	G	0.2645	0.0203	TRUE	12	?++???+???++?+??++????+??+????????++	79.9	54.6653	8.923e-08	0.0143313	0.388413	0.0413533	5.86e-21	0.0829909	6.3e-06	214	FALSE	1
	cg05457628-chr5:179030448:SNP	cg05457628	TSS200;TSS200	NM_001040452.3_2;NM_001040451.3_2	RUFY1;RUFY1	Island	chr5	178986728	chr5:179030448:SNP	rs11249649	43720	0.66409	0.0097267	0	24045	C	G	0.241	0.0164	TRUE	31	+++++++?+?+++++++++++?++?+?+++++++++	71.4	104.817	3.174e-10	0.0074248	0.653339	0.0190873	0.0000000000000000000000000000000000000000000000000000000000000000000000000000000000000000000000000000000000000000000000000000000000000000000000000000000000000000000000000000000000000000000000000000000000000000000000000000000000000000000000000000000000000000896	0.0339843	4.92e-85	214	FALSE	1
	cg05457628-chr5:179092141:SNP	cg05457628	TSS200;TSS200	NM_001040452.3_2;NM_001040451.3_2	RUFY1;RUFY1	Island	chr5	178986728	chr5:179092141:SNP	rs11249652	105413	0.168067	0.0157411	1.31e-26	19919	A	G	0.1153	0.0105	TRUE	28	++++++?++++-?++-++?+++?+?+??+++++?++	35.3	41.739	0.03492	0.0038389	0.172849	0.020459	2.95e-17	0.0243339	4.96e-12	214	FALSE	1
	cg05457628-chr5:179260494:SNP	cg05457628	TSS200;TSS200	NM_001040452.3_2;NM_001040451.3_2	RUFY1;RUFY1	Island	chr5	178986728	chr5:179260494:SNP	rs155787	273766	0.127513	0.0109389	2.12e-31	16927	G	A	0.4542	0.0263	TRUE	22	-----???-?----?++-????-??-??-----?--	37.6	33.6351	0.03963	0.0016319	0.126783	0.0147979	1.06e-17	0.0175205	3.39e-13	214	FALSE	1
	cg05457628-chr5:178843040:SNP	cg05457628	TSS200;TSS200	NM_001040452.3_2;NM_001040451.3_2	RUFY1;RUFY1	Island	chr5	178986728	chr5:178843040:SNP	rs34967622	143688	-0.171698	0.0164071	1.25e-25	21601	T	G	0.0974	0.0154	TRUE	28	----+-??---+?--++-------?-??---?-?+-	33.1	40.3343	0.04766	0.0038058	-0.160198	0.0212566	4.83e-14	0.02451	2.47e-12	214	FALSE	1
	cg05457628-chr5:179042400:SNP	cg05457628	TSS200;TSS200	NM_001040452.3_2;NM_001040451.3_2	RUFY1;RUFY1	Island	chr5	178986728	chr5:179042400:SNP	rs61408162	55672	-0.547305	0.0090299	0	23525	T	C	0.345	0.0197	TRUE	29	---?--??-------------?--?-??--------	69	90.2937	1.784e-08	0.0053549	-0.54275	0.0171994	1.47e-218	0.0291193	8.26e-79	214	FALSE	1
	cg05457628-chr5:178856589:SNP	cg05457628	TSS200;TSS200	NM_001040452.3_2;NM_001040451.3_2	RUFY1;RUFY1	Island	chr5	178986728	chr5:178856589:SNP	rs2009877	130139	0.148956	0.0101069	3.68e-49	23971	A	G	0.289	0.0308	TRUE	31	++++++++++++?+++++++++++?+??+++++?-+	16.7	35.9933	0.2083	0.0006439	0.149114	0.0114521	9.33e-39	0.0121261	1.11e-34	214	FALSE	1
	cg05457628-chr5:179040725:SNP	cg05457628	TSS200;TSS200	NM_001040452.3_2;NM_001040451.3_2	RUFY1;RUFY1	Island	chr5	178986728	chr5:179040725:SNP	rs6878059	53997	0.576206	0.0337884	3.3e-65	13772	C	T	0.0333	0.0139	TRUE	17	---?--????--?-???-????-??-??--?--?--	0	13.0452	0.6695	0	0.576206	0.0337884	3.3e-65	0.0337884	3.3e-65	214	FALSE	1
	cg05457628-chr5:178935867:SNP	cg05457628	TSS200;TSS200	NM_001040452.3_2;NM_001040451.3_2	RUFY1;RUFY1	Island	chr5	178986728	chr5:178935867:SNP	rs11742479	50861	0.230962	0.0153566	4.02e-51	10497	G	A	0.2847	0.0145	TRUE	15	---???????--?--?--???????-??-??--?--	16	16.6578	0.2749	0.0006929	0.230187	0.017298	2.1e-40	0.018272	1.27e-36	214	FALSE	1
	cg05457628-chr5:179086965:SNP	cg05457628	TSS200;TSS200	NM_001040452.3_2;NM_001040451.3_2	RUFY1;RUFY1	Island	chr5	178986728	chr5:179086965:SNP	rs147251680	100237	0.538275	0.0503909	1.24e-26	10476	A	G	0.0199	0.0036	TRUE	14	+++??????????+???+?????+?+??+++++?-+	42.4	22.5623	0.04724	0.0269605	0.526488	0.0703172	7.03e-14	0.0874567	7.52e-10	214	FALSE	1
	cg05457628-chr5:179027233:SNP	cg05457628	TSS200;TSS200	NM_001040452.3_2;NM_001040451.3_2	RUFY1;RUFY1	Island	chr5	178986728	chr5:179027233:SNP	rs115390848	40505	0.487452	0.01932	1.86e-140	21316	A	G	0.0668	0.0089	TRUE	27	+++++???+++++++++++?+?++?+??+++++?++	0	23.477	0.6058	0	0.487452	0.01932	1.86e-140	0.01932	1.86e-140	214	FALSE	1
	cg05457628-chr5:179259842:SNP	cg05457628	TSS200;TSS200	NM_001040452.3_2;NM_001040451.3_2	RUFY1;RUFY1	Island	chr5	178986728	chr5:179259842:SNP	rs2450484	273114	0.14049	0.0086886	8.29e-59	26431	G	C	0.4529	0.0262	TRUE	34	-------?-------++-------?-----------	24.3	43.5945	0.1027	0.000836	0.141568	0.0103887	2.76e-42	0.011478	1.9e-34	214	FALSE	1
	cg05457628-chr5:179056736:SNP	cg05457628	TSS200;TSS200	NM_001040452.3_2;NM_001040451.3_2	RUFY1;RUFY1	Island	chr5	178986728	chr5:179056736:SNP	rs72824556	70008	-0.460397	0.0146724	3.99e-216	24821	A	G	0.1027	0.0125	TRUE	31	-------?-------------?--?-??--------	0	27.2363	0.6108	0	-0.460397	0.0146724	3.99e-216	0.0146724	3.99e-216	214	FALSE	1
	cg05457628-chr5:178957291:SNP	cg05457628	TSS200;TSS200	NM_001040452.3_2;NM_001040451.3_2	RUFY1;RUFY1	Island	chr5	178986728	chr5:178957291:SNP	rs80155794	29437	-0.425665	0.0214442	1.1e-87	17158	A	G	0.0683	0.0096	TRUE	22	---?-?-?-?--------????-??-??--?--?--	4.9	22.0868	0.3945	0.0005366	-0.427976	0.0222642	2.4e-82	0.022554	1.9e-79	214	FALSE	1
	cg05457628-chr5:179066120:SNP	cg05457628	TSS200;TSS200	NM_001040452.3_2;NM_001040451.3_2	RUFY1;RUFY1	Island	chr5	178986728	chr5:179066120:SNP	rs4623109	79392	-0.41396	0.0183522	1.16e-112	17433	A	G	0.0918	0.0083	TRUE	25	---?---?-?--?-------???-?-??-----?--	0	17.7535	0.8148	0	-0.41396	0.0183522	1.16e-112	0.0183522	1.16e-112	214	FALSE	1
	cg05457628-chr5:179107460:SNP	cg05457628	TSS200;TSS200	NM_001040452.3_2;NM_001040451.3_2	RUFY1;RUFY1	Island	chr5	178986728	chr5:179107460:SNP	rs116755034	120732	0.494354	0.0423791	1.92e-31	8487	A	G	0.0362	0.0113	TRUE	12	+++?+?????++?+???+???????+??????+?++	0	10.9665	0.4461	0	0.494354	0.0423791	1.92e-31	0.0423791	1.92e-31	214	FALSE	1
	cg05457628-chr5:178962197:INDEL	cg05457628	TSS200;TSS200	NM_001040452.3_2;NM_001040451.3_2	RUFY1;RUFY1	Island	chr5	178986728	chr5:178962197:INDEL	chr5.178962197	24531	0.584168	0.0100199	0	23413	D	I	0.247	0.0157	TRUE	31	++++++??+?++++++++++++++?++++++?++++	50.3	60.3878	0.0008261	0.0032027	0.583089	0.0150027	0	0.0201693	1.92e-184	214	FALSE	1
	cg05457628-chr5:179048449:SNP	cg05457628	TSS200;TSS200	NM_001040452.3_2;NM_001040451.3_2	RUFY1;RUFY1	Island	chr5	178986728	chr5:179048449:SNP	rs4535419	61721	-0.429504	0.0082361	0	27142	G	T	0.4412	0.0222	TRUE	35	++++++++++++++++++++++++++?+++++++++	51.2	69.7111	0.0002942	0.0025264	-0.430189	0.012419	0.0000000000000000000000000000000000000000000000000000000000000000000000000000000000000000000000000000000000000000000000000000000000000000000000000000000000000000000000000000000000000000000000000000000000000000000000000000000000000000000000000000000000000000000000643	0.0168866	1.05e-142	214	FALSE	1
	cg05457628-chr5:179270167:SNP	cg05457628	TSS200;TSS200	NM_001040452.3_2;NM_001040451.3_2	RUFY1;RUFY1	Island	chr5	178986728	chr5:179270167:SNP	rs34617509	283439	-0.11439	0.0089759	3.36e-37	24991	C	T	0.4656	0.0403	TRUE	33	+++++++?+?+++++--+++++++?+++++++++-+	0	29.6175	0.5877	0	-0.11439	0.0089759	3.36e-37	0.0089759	3.36e-37	214	FALSE	1
	cg05457628-chr5:179040000:INDEL	cg05457628	TSS200;TSS200	NM_001040452.3_2;NM_001040451.3_2	RUFY1;RUFY1	Island	chr5	178986728	chr5:179040000:INDEL	chr5.179040000	53272	-0.266478	0.0155979	1.95e-65	16769	I	D	0.1483	0.0238	TRUE	21	?++??++???++?++?++++??++?+?+?++??+++	34.9	30.7247	0.05893	0.0028149	-0.262649	0.0204708	1.11e-37	0.0239621	9.94e-29	214	FALSE	1
	cg05457628-chr5:178887086:SNP	cg05457628	TSS200;TSS200	NM_001040452.3_2;NM_001040451.3_2	RUFY1;RUFY1	Island	chr5	178986728	chr5:178887086:SNP	rs4701156	99642	0.172705	0.0128516	3.6e-41	27247	A	G	0.1266	0.0145	TRUE	35	+++++++++++-+++-++++++++?++++++++++-	9.6	37.6201	0.3069	0.0006253	0.170962	0.0138167	3.63e-35	0.0142199	6.08e-34	214	FALSE	1
	cg05457628-chr5:178841409:SNP	cg05457628	TSS200;TSS200	NM_001040452.3_2;NM_001040451.3_2	RUFY1;RUFY1	Island	chr5	178986728	chr5:178841409:SNP	rs584609	145319	0.185743	0.013968	2.39e-40	10158	C	G	0.5354	0.0149	TRUE	14	+??++?+?++?++??+????++??????+??++???	24	17.1049	0.1946	0.0008885	0.184311	0.0165962	1.18e-28	0.0183786	5.17e-24	214	FALSE	1
	cg05457628-chr5:179092991:INDEL	cg05457628	TSS200;TSS200	NM_001040452.3_2;NM_001040451.3_2	RUFY1;RUFY1	Island	chr5	178986728	chr5:179092991:INDEL	chr5.179092991	106263	0.310038	0.0259274	5.9e-33	5330	D	I	0.1672	0.0124	TRUE	9	?++???????++?+???+???????+????????++	51.2	16.3841	0.0372	0.0066807	0.30336	0.0399962	3.33e-14	0.0530996	5.26e-09	214	FALSE	1
	cg05457628-chr5:178884561:SNP	cg05457628	TSS200;TSS200	NM_001040452.3_2;NM_001040451.3_2	RUFY1;RUFY1	Island	chr5	178986728	chr5:178884561:SNP	rs6884364	102167	0.150241	0.0126775	2.13e-32	27253	C	T	0.1303	0.0147	TRUE	35	----+------+---+--------?----------+	23.3	44.3142	0.1109	0.0017343	0.147135	0.0150915	1.85e-22	0.0165234	9.67e-20	214	FALSE	1
	cg05457628-chr5:178991684:SNP	cg05457628	TSS200;TSS200	NM_001040452.3_2;NM_001040451.3_2	RUFY1;RUFY1	Island	chr5	178986728	chr5:178991684:SNP	rs371324093	4956	-0.26914	0.0155983	1.04e-66	16769	G	A	0.1476	0.0229	TRUE	21	?++??++???++?++?++++??++?+?+?++??+++	34.8	30.6975	0.05931	0.0028072	-0.266435	0.0204586	9.04e-39	0.0239415	2.55e-29	214	FALSE	1
	cg05457628-chr5:179016067:INDEL	cg05457628	TSS200;TSS200	NM_001040452.3_2;NM_001040451.3_2	RUFY1;RUFY1	Island	chr5	178986728	chr5:179016067:INDEL	chr5.179016067	29339	0.603622	0.0198156	8.32e-204	22658	I	D	0.0585	0.0092	TRUE	29	-------?-?-----------?--?-??---?----	0	23.5855	0.7032	0	0.603622	0.0198156	8.32e-204	0.0198156	8.32e-204	214	FALSE	1
	cg05457628-chr5:178991120:INDEL	cg05457628	TSS200;TSS200	NM_001040452.3_2;NM_001040451.3_2	RUFY1;RUFY1	Island	chr5	178986728	chr5:178991120:INDEL	chr5.178991120	4392	0.41228	0.0134443	1.62e-206	10831	D	I	0.3706	0.017	TRUE	14	?++???????++?+??+++???+??+???++???++	52.1	27.1133	0.012	0.0029255	0.417738	0.0215005	4.37e-84	0.0280399	6.13e-49	214	FALSE	1
	cg05457628-chr5:178885822:SNP	cg05457628	TSS200;TSS200	NM_001040452.3_2;NM_001040451.3_2	RUFY1;RUFY1	Island	chr5	178986728	chr5:178885822:SNP	rs149074195	100906	0.146119	0.0128788	7.79e-30	26454	A	G	0.1305	0.0153	TRUE	34	++++-++?+++-+++-++++++++?++++++++++-	24.4	43.6523	0.1017	0.0018507	0.142095	0.0154647	3.99e-20	0.0170361	9.74e-18	214	FALSE	1
	cg05457628-chr5:178851100:SNP	cg05457628	TSS200;TSS200	NM_001040452.3_2;NM_001040451.3_2	RUFY1;RUFY1	Island	chr5	178986728	chr5:178851100:SNP	rs7723024	135628	0.160218	0.0154875	4.41e-25	24838	A	G	0.0944	0.0095	TRUE	32	+++++-+++-+++++-++++++++?+??+++++?++	32.6	45.9853	0.04063	0.0037669	0.158975	0.0197495	8.31e-16	0.0229741	3.08e-12	214	FALSE	1
	cg05457628-chr5:178921861:SNP	cg05457628	TSS200;TSS200	NM_001040452.3_2;NM_001040451.3_2	RUFY1;RUFY1	Island	chr5	178986728	chr5:178921861:SNP	rs11249631	64867	-0.106886	0.0092038	3.53e-31	25435	T	G	0.3671	0.0214	TRUE	32	-----?---------+--?-----++??--------	36.1	48.5411	0.02334	0.0015565	-0.10543	0.012092	2.81e-18	0.0144118	1.2e-13	214	FALSE	1
	cg05457628-chr5:179052804:SNP	cg05457628	TSS200;TSS200	NM_001040452.3_2;NM_001040451.3_2	RUFY1;RUFY1	Island	chr5	178986728	chr5:179052804:SNP	rs116028267	66076	-0.47108	0.0314909	1.36e-50	14839	G	C	0.0344	0.006	TRUE	18	+++??+????++?+??++????+??+??+++++?++	11.7	19.2553	0.3141	0.002462	-0.471209	0.0346606	4.29e-42	0.0356687	7.98e-40	214	FALSE	1
	cg05457628-chr5:179043993:INDEL	cg05457628	TSS200;TSS200	NM_001040452.3_2;NM_001040451.3_2	RUFY1;RUFY1	Island	chr5	178986728	chr5:179043993:INDEL	chr5.179043993	57265	0.655852	0.0190683	0.000000000000000000000000000000000000000000000000000000000000000000000000000000000000000000000000000000000000000000000000000000000000000000000000000000000000000000000000000000000000000000000000000000000000000000000000000000000000000000000000000000000000000000301	15908	I	D	0.0923	0.0087	TRUE	20	?--??-????--?--?----??--?-?-?--??---	34.3	28.9174	0.0673	0.0038961	0.656591	0.0248933	2.57e-153	0.0290214	4.44e-113	214	FALSE	1
	cg05457628-chr5:178956605:SNP	cg05457628	TSS200;TSS200	NM_001040452.3_2;NM_001040451.3_2	RUFY1;RUFY1	Island	chr5	178986728	chr5:178956605:SNP	rs36112669	30123	0.409148	0.010755	0.000000000000000000000000000000000000000000000000000000000000000000000000000000000000000000000000000000000000000000000000000000000000000000000000000000000000000000000000000000000000000000000000000000000000000000000000000000000000000000000000000000000000000000000000000000000000000000000000000000000000000000000000000114000000607536	24045	A	G	0.2172	0.0168	TRUE	31	+++++++?+?+++++++++++?++?+?+++++++++	0	24.1302	0.7661	0	0.409148	0.010755	0.000000000000000000000000000000000000000000000000000000000000000000000000000000000000000000000000000000000000000000000000000000000000000000000000000000000000000000000000000000000000000000000000000000000000000000000000000000000000000000000000000000000000000000000000000000000000000000000000000000000000000000000000000114000000607536	0.010755	0.000000000000000000000000000000000000000000000000000000000000000000000000000000000000000000000000000000000000000000000000000000000000000000000000000000000000000000000000000000000000000000000000000000000000000000000000000000000000000000000000000000000000000000000000000000000000000000000000000000000000000000000000000114000000607536	214	FALSE	1
	cg05457628-chr5:179146993:SNP	cg05457628	TSS200;TSS200	NM_001040452.3_2;NM_001040451.3_2	RUFY1;RUFY1	Island	chr5	178986728	chr5:179146993:SNP	rs13184690	160265	-0.15424	0.0086707	8.66e-71	26231	T	C	0.4845	0.0213	TRUE	34	-------------------?------?---------	18.6	40.5389	0.172	0.0005926	-0.156329	0.0099386	9.51e-56	0.0106516	1.61e-47	214	FALSE	1
	cg05457628-chr5:179253926:SNP	cg05457628	TSS200;TSS200	NM_001040452.3_2;NM_001040451.3_2	RUFY1;RUFY1	Island	chr5	178986728	chr5:179253926:SNP	rs565280	267198	0.139145	0.0085576	1.9e-59	27240	A	G	0.4579	0.0252	TRUE	35	+++++++++++++++--+++++++?+++++++++++	21.8	43.5038	0.1273	0.0007263	0.140488	0.0100333	1.51e-44	0.0109496	5.36e-37	214	FALSE	1
	cg05457628-chr5:179008023:INDEL	cg05457628	TSS200;TSS200	NM_001040452.3_2;NM_001040451.3_2	RUFY1;RUFY1	Island	chr5	178986728	chr5:179008023:INDEL	chr5.179008023	21295	0.617206	0.0232386	2e-155	16769	I	D	0.0578	0.0084	TRUE	21	?--??--???--?--?----??--?-?-?--??---	0	12.0606	0.914	0	0.617206	0.0232386	2e-155	0.0232386	2e-155	214	FALSE	1
	cg05457628-chr5:178976393:SNP	cg05457628	TSS200;TSS200	NM_001040452.3_2;NM_001040451.3_2	RUFY1;RUFY1	Island	chr5	178986728	chr5:178976393:SNP	rs4700836	10335	0.769072	0.0075053	0	26468	G	A	0.414	0.0205	TRUE	34	-------?----------------?-----------	73.2	123.195	2.48e-12	0.0053034	0.764484	0.015227	0	0.0280186	7.21e-166	214	FALSE	1
	cg05457628-chr5:179471145:SNP	cg05457628	TSS200;TSS200	NM_001040452.3_2;NM_001040451.3_2	RUFY1;RUFY1	Island	chr5	178986728	chr5:179471145:SNP	rs10068594	484417	-0.125725	0.0087184	3.84e-47	27240	G	A	0.3948	0.0256	TRUE	35	+++++++++++++++--+++++++?+++++++++-+	14.9	39.9651	0.2222	0.0004726	-0.125643	0.0096961	2.11e-38	0.010248	1.34e-34	214	FALSE	1
	cg05457628-chr5:179576550:SNP	cg05457628	TSS200;TSS200	NM_001040452.3_2;NM_001040451.3_2	RUFY1;RUFY1	Island	chr5	178986728	chr5:179576550:SNP	rs75236707	589822	-0.108506	0.0131639	1.68e-16	19615	A	G	0.1842	0.0283	TRUE	24	---?---???----??--?-??--?+??-----++-	28.6	32.2103	0.09585	0.0017018	-0.108358	0.0163404	3.33e-11	0.0184354	3.96e-09	214	FALSE	1
	cg05457628-chr5:179454428:SNP	cg05457628	TSS200;TSS200	NM_001040452.3_2;NM_001040451.3_2	RUFY1;RUFY1	Island	chr5	178986728	chr5:179454428:SNP	rs10036834	467700	-0.127573	0.0090166	1.9e-45	27750	G	A	0.3292	0.0342	TRUE	36	+++++++++++++++--+++++++++++++++++-+	11.8	39.6719	0.2695	0.0003956	-0.126846	0.0098104	3.06e-38	0.0102201	9.29e-36	214	FALSE	1
	cg05457628-chr5:179056108:SNP	cg05457628	TSS200;TSS200	NM_001040452.3_2;NM_001040451.3_2	RUFY1;RUFY1	Island	chr5	178986728	chr5:179056108:SNP	rs13164550	69380	-0.396614	0.0156045	1.65e-142	13210	A	C	0.1856	0.0152	TRUE	17	?--??-????--?--?---???--?-???--???--	66.5	47.803	5.101e-05	0.008577	-0.389705	0.029403	4.28e-40	0.0466213	1.78e-17	214	FALSE	1
	cg05457628-chr5:178949499:SNP	cg05457628	TSS200;TSS200	NM_001040452.3_2;NM_001040451.3_2	RUFY1;RUFY1	Island	chr5	178986728	chr5:178949499:SNP	rs28689892	37229	-0.484332	0.0094349	0	20943	T	C	0.4	0.0285	TRUE	26	---?---?-?----------??-??-??---?----	51.3	51.3135	0.001463	0.0024875	-0.482755	0.0144119	5.34e-246	0.0193655	4.75e-138	214	FALSE	1
	cg05457628-chr5:178986987:SNP	cg05457628	TSS200;TSS200	NM_001040452.3_2;NM_001040451.3_2	RUFY1;RUFY1	Island	chr5	178986728	chr5:178986987:SNP	rs12658664	259	0.966234	0.0067037	0	27235	T	C	0.3643	0.0193	TRUE	35	++++++++++++++++++++++++?+++++++++++	84	212.2	1.209e-27	0.0083464	0.959059	0.0174445	0	0.0418393	5.33e-118	214	FALSE	1
	cg05457628-chr5:178970635:SNP	cg05457628	TSS200;TSS200	NM_001040452.3_2;NM_001040451.3_2	RUFY1;RUFY1	Island	chr5	178986728	chr5:178970635:SNP	rs192544953	16093	-0.43278	0.0258043	3.93e-63	25011	A	G	0.0332	0.0078	TRUE	31	-----?-----?------------?--?---?----	0	18.6766	0.9465	0	-0.43278	0.0258043	3.93e-63	0.0258043	3.93e-63	214	FALSE	1
	cg05457628-chr5:178949198:SNP	cg05457628	TSS200;TSS200	NM_001040452.3_2;NM_001040451.3_2	RUFY1;RUFY1	Island	chr5	178986728	chr5:178949198:SNP	rs28378829	37530	0.431763	0.0196269	2.98e-107	22895	G	A	0.0596	0.006	TRUE	29	---?---?-------------?--?-??--?-----	58.7	67.7278	3.842e-05	0.0161027	0.435728	0.0323341	2.17e-41	0.0474746	9.49e-20	214	FALSE	1
	cg05457628-chr5:178892503:SNP	cg05457628	TSS200;TSS200	NM_001040452.3_2;NM_001040451.3_2	RUFY1;RUFY1	Island	chr5	178986728	chr5:178892503:SNP	rs4701164	94225	0.136182	0.0132741	1.08e-24	23322	A	G	0.1397	0.0142	TRUE	30	++++-++?+?+-+-++++++??+-?+?+++++-+++	16.2	34.6063	0.2178	0.0010417	0.132717	0.0150025	9.04e-19	0.0158403	8.17e-18	214	FALSE	1
	cg05457628-chr5:178958678:SNP	cg05457628	TSS200;TSS200	NM_001040452.3_2;NM_001040451.3_2	RUFY1;RUFY1	Island	chr5	178986728	chr5:178958678:SNP	rs28495954	28050	0.451285	0.0115615	0	24814	A	G	0.1762	0.0111	TRUE	31	+++++++?+++++++++++++?++?+??++++++++	66.4	89.2346	8.575e-08	0.0082982	0.451174	0.0210145	2.99e-102	0.0343895	2.44e-39	214	FALSE	1
	cg05457628-chr5:179085461:SNP	cg05457628	TSS200;TSS200	NM_001040452.3_2;NM_001040451.3_2	RUFY1;RUFY1	Island	chr5	178986728	chr5:179085461:SNP	rs36025393	98733	0.277028	0.0153282	5.19e-73	16564	T	C	0.1473	0.0108	TRUE	24	+++?++??+?++?++++++++??+?+??+++?+?++	57.8	54.4668	0.000231	0.007854	0.283116	0.024977	8.79e-30	0.036299	2.31e-14	214	FALSE	1
	cg05457628-chr5:178985270:SNP	cg05457628	TSS200;TSS200	NM_001040452.3_2;NM_001040451.3_2	RUFY1;RUFY1	Island	chr5	178986728	chr5:178985270:SNP	rs4701132	1458	0.966954	0.0066953	0	27232	A	G	0.3641	0.0194	TRUE	35	++++++++++++++++++++++++?+++++++++++	83.5	205.949	1.715e-26	0.0080335	0.96093	0.0171716	0	0.0405554	1.2e-125	214	FALSE	1
	cg05457628-chr5:178840577:SNP	cg05457628	TSS200;TSS200	NM_001040452.3_2;NM_001040451.3_2	RUFY1;RUFY1	Island	chr5	178986728	chr5:178840577:SNP	rs79379710	146151	0.15128	0.0123323	1.36e-34	23261	A	G	0.1706	0.0201	TRUE	31	+++++++?+?+++++--++++-++?+?++++++?+-	15.3	35.4011	0.2283	0.0008627	0.149107	0.0138008	3.29e-27	0.0145526	2.6e-25	214	FALSE	1
	cg05457628-chr5:179077358:SNP	cg05457628	TSS200;TSS200	NM_001040452.3_2;NM_001040451.3_2	RUFY1;RUFY1	Island	chr5	178986728	chr5:179077358:SNP	chr5.179077358	90630	0.704333	0.0256018	1.29e-166	6930	C	T	0.1016	0.0199	TRUE	9	?--????????-?-???-????-??-????????--	0	4.11214	0.8469	0	0.704333	0.0256018	1.29e-166	0.0256018	1.29e-166	214	FALSE	1
	cg05457628-chr5:179059272:SNP	cg05457628	TSS200;TSS200	NM_001040452.3_2;NM_001040451.3_2	RUFY1;RUFY1	Island	chr5	178986728	chr5:179059272:SNP	rs11740867	72544	0.576619	0.0087407	0	22650	C	G	0.4126	0.0236	TRUE	29	+++++++?+?+++++++++++?++?+??+++?++++	65	79.9652	6.755e-07	0.0041872	0.575657	0.015639	0.0000000000000000000000000000000000000000000000000000000000000000000000000000000000000000000000000000000000000000000000000000000000000000000000000000000000000000000000000000000000000000000000000000000000000000000000000000000000000000000000000000000000000000000000000000000000000000000000000000000133	0.0249627	4.71e-118	214	FALSE	1
	cg05457628-chr5:179258523:SNP	cg05457628	TSS200;TSS200	NM_001040452.3_2;NM_001040451.3_2	RUFY1;RUFY1	Island	chr5	178986728	chr5:179258523:SNP	rs2431118	271795	-0.137276	0.008926	0	24996	A	G	0.5293	0.0264	TRUE	33	-------?-?-----++-------?-----------	19.9	39.9285	0.1584	0.0006614	-0.138579	0.0103243	4.46e-41	0.0111376	6.6e-35	214	FALSE	1
	cg05457628-chr5:178890529:SNP	cg05457628	TSS200;TSS200	NM_001040452.3_2;NM_001040451.3_2	RUFY1;RUFY1	Island	chr5	178986728	chr5:178890529:SNP	rs57714435	96199	-0.255941	0.0117289	1.45e-105	25383	C	T	0.1724	0.029	TRUE	32	+++++++?++++++++++?+++++?+?+++++++++	24.1	40.8429	0.1111	0.0014166	-0.255214	0.0139726	1.56e-74	0.0154529	1.3e-61	214	FALSE	1
	cg05457628-chr5:178941222:SNP	cg05457628	TSS200;TSS200	NM_001040452.3_2;NM_001040451.3_2	RUFY1;RUFY1	Island	chr5	178986728	chr5:178941222:SNP	rs201372517	45506	0.142576	0.0133421	1.18e-26	14129	A	G	0.2701	0.019	TRUE	17	?++???????++?++?++++??+??+???++??+++	0	14.5128	0.5606	0	0.142576	0.0133421	1.18e-26	0.0133421	1.18e-26	214	FALSE	1
	cg05457628-chr5:179114863:SNP	cg05457628	TSS200;TSS200	NM_001040452.3_2;NM_001040451.3_2	RUFY1;RUFY1	Island	chr5	178986728	chr5:179114863:SNP	rs112219346	128135	0.230991	0.0101741	4.1e-114	19889	C	T	0.3814	0.0139	TRUE	26	------??-?---------??--??-??----?---	16.4	29.9219	0.2272	0.0005426	0.231658	0.0115664	3.11e-89	0.0121771	3.06e-80	214	FALSE	1
	cg05457628-chr5:178935352:SNP	cg05457628	TSS200;TSS200	NM_001040452.3_2;NM_001040451.3_2	RUFY1;RUFY1	Island	chr5	178986728	chr5:178935352:SNP	rs12659147	51376	-0.333829	0.0152221	1.33e-106	8525	T	G	0.4026	0.0138	TRUE	13	---???????--?-??--???????-??-???-?--	78.6	55.9719	1.211e-07	0.0115201	-0.338826	0.0353336	8.87e-22	0.0710008	2.58e-06	214	FALSE	1
	cg05457628-chr5:178938107:SNP	cg05457628	TSS200;TSS200	NM_001040452.3_2;NM_001040451.3_2	RUFY1;RUFY1	Island	chr5	178986728	chr5:178938107:SNP	rs62395189	48621	-0.249183	0.0195296	2.77e-37	6668	C	T	0.2696	0.0517	TRUE	12	?++???????++?+??-+???????+??+??+??++	41.3	18.751	0.06571	0.0033903	-0.239	0.027492	3.52e-18	0.033291	7.16e-14	214	FALSE	1
	cg05457628-chr5:179092435:SNP	cg05457628	TSS200;TSS200	NM_001040452.3_2;NM_001040451.3_2	RUFY1;RUFY1	Island	chr5	178986728	chr5:179092435:SNP	rs6872891	105707	0.16419	0.0157653	2.13e-25	19905	C	A	0.1152	0.0107	TRUE	28	------?----+?--+--?---?-?-??-----?--	36.3	42.4194	0.02991	0.0040283	0.168563	0.0206674	3.46e-16	0.0247687	3.38e-11	214	FALSE	1
	cg05457628-chr5:178851394:SNP	cg05457628	TSS200;TSS200	NM_001040452.3_2;NM_001040451.3_2	RUFY1;RUFY1	Island	chr5	178986728	chr5:178851394:SNP	rs2411390	135334	0.146102	0.0086824	1.54e-63	26649	C	T	0.4504	0.0425	TRUE	34	------------------------?-?---------	26.4	44.8567	0.08165	0.0009343	0.148522	0.0105526	5.45e-45	0.0118019	3.37e-35	214	FALSE	1
	cg05457628-chr5:179071866:SNP	cg05457628	TSS200;TSS200	NM_001040452.3_2;NM_001040451.3_2	RUFY1;RUFY1	Island	chr5	178986728	chr5:179071866:SNP	rs4990390	85138	0.533225	0.0154473	0.00000000000000000000000000000000000000000000000000000000000000000000000000000000000000000000000000000000000000000000000000000000000000000000000000000000000000000000000000000000000000000000000000000000000000000000000000000000000000000000000000000000000000000000418	10344	G	A	0.2467	0.0224	TRUE	16	---?--????--?-?-?-?????-?-??-???-?--	66.8	45.1643	7.213e-05	0.0078884	0.52472	0.0283414	1.58e-76	0.0465112	1.99e-30	214	FALSE	1
	cg05457628-chr5:178855640:SNP	cg05457628	TSS200;TSS200	NM_001040452.3_2;NM_001040451.3_2	RUFY1;RUFY1	Island	chr5	178986728	chr5:178855640:SNP	rs4701117	131088	0.155626	0.0154361	6.64e-24	24831	A	G	0.0953	0.0094	TRUE	32	+++++-+++-+++++-++++++++?+??+++++?++	29.4	43.9095	0.06212	0.0032237	0.154105	0.0191938	9.84e-16	0.0218642	1.1e-12	214	FALSE	1
	cg05457628-chr5:178981003:SNP	cg05457628	TSS200;TSS200	NM_001040452.3_2;NM_001040451.3_2	RUFY1;RUFY1	Island	chr5	178986728	chr5:178981003:SNP	rs10479541	5725	0.722741	0.008414	0	26465	C	G	0.2946	0.019	TRUE	34	+++++++?++++++++++++++++?+++++++++++	66	97.1993	3.036e-08	0.004747	0.717363	0.0152125	0	0.0247828	5.71e-187	214	FALSE	1
	cg05457628-chr5:179066180:SNP	cg05457628	TSS200;TSS200	NM_001040452.3_2;NM_001040451.3_2	RUFY1;RUFY1	Island	chr5	178986728	chr5:179066180:SNP	rs4568328	79452	-0.401111	0.0167245	4.14e-127	9659	G	C	0.2303	0.0191	TRUE	14	+++?+?????++?+???+???????+??+??++?++	59.1	31.7588	0.002608	0.0058244	-0.404135	0.0277467	4.68e-48	0.0408576	9.49e-23	214	FALSE	1
	cg05457628-chr5:179277901:INDEL	cg05457628	TSS200;TSS200	NM_001040452.3_2;NM_001040451.3_2	RUFY1;RUFY1	Island	chr5	178986728	chr5:179277901:INDEL	chr5.179277901	291173	0.137906	0.0092088	1.06e-50	23662	I	D	0.4519	0.0343	TRUE	31	-------?-?-----++-------?-?----?----	28.5	41.9427	0.07239	0.0010645	0.13843	0.0114019	6.4e-34	0.0128747	9e-27	214	FALSE	1
	cg05457628-chr5:179057314:SNP	cg05457628	TSS200;TSS200	NM_001040452.3_2;NM_001040451.3_2	RUFY1;RUFY1	Island	chr5	178986728	chr5:179057314:SNP	rs13188643	70586	0.621985	0.0151248	0	25248	T	C	0.0914	0.0085	TRUE	32	++++++?++++++++++++++?++++??++++++++	42.4	53.8394	0.006688	0.0054707	0.623881	0.0210097	8.95e-194	0.0262681	6.03e-124	214	FALSE	1
	cg05457628-chr5:179039621:INDEL	cg05457628	TSS200;TSS200	NM_001040452.3_2;NM_001040451.3_2	RUFY1;RUFY1	Island	chr5	178986728	chr5:179039621:INDEL	chr5.179039621	52893	0.863213	0.0082611	0	23667	I	D	0.3071	0.0196	TRUE	31	-------?-?--------------?-?----?----	78.7	140.73	2.871e-16	0.0079308	0.859521	0.018776	0	0.0387529	6.49e-110	214	FALSE	1
	cg05457628-chr5:179087081:SNP	cg05457628	TSS200;TSS200	NM_001040452.3_2;NM_001040451.3_2	RUFY1;RUFY1	Island	chr5	178986728	chr5:179087081:SNP	rs142984490	100353	0.538275	0.0503909	1.24e-26	10476	T	A	0.0199	0.0036	TRUE	14	---??????????-???-?????-?-??-----?+-	42.4	22.5623	0.04724	0.0269605	0.526488	0.0703172	7.03e-14	0.0874567	7.52e-10	214	FALSE	1
	cg05457628-chr5:179111485:SNP	cg05457628	TSS200;TSS200	NM_001040452.3_2;NM_001040451.3_2	RUFY1;RUFY1	Island	chr5	178986728	chr5:179111485:SNP	rs11249656	124757	0.220128	0.0091242	1.34e-128	23932	C	T	0.4141	0.0146	TRUE	30	-------?------------?--??-??--------	15.8	34.4437	0.2234	0.0004768	0.220849	0.0102588	8.54e-103	0.0108369	9.9e-92	214	FALSE	1
	cg05457628-chr5:179027685:INDEL	cg05457628	TSS200;TSS200	NM_001040452.3_2;NM_001040451.3_2	RUFY1;RUFY1	Island	chr5	178986728	chr5:179027685:INDEL	chr5.179027685	40957	-0.528065	0.0126068	0	10848	D	I	0.4786	0.011	TRUE	14	?--???????--?-??---???-??-???--???--	75.1	52.1434	1.273e-06	0.0071609	-0.512296	0.0279927	8.12e-75	0.0505661	1.58e-25	214	FALSE	1
	cg05457628-chr5:179114384:SNP	cg05457628	TSS200;TSS200	NM_001040452.3_2;NM_001040451.3_2	RUFY1;RUFY1	Island	chr5	178986728	chr5:179114384:SNP	rs11749559	127656	0.22533	0.0097372	1.78e-118	21654	A	G	0.3841	0.0148	TRUE	28	+++++++?+?++++++++++?++??+??++++?+++	29.2	38.1616	0.07534	0.0011195	0.22565	0.0121815	1.32e-76	0.0137625	2.99e-60	214	FALSE	1
	cg05457628-chr5:178991768:INDEL	cg05457628	TSS200;TSS200	NM_001040452.3_2;NM_001040451.3_2	RUFY1;RUFY1	Island	chr5	178986728	chr5:178991768:INDEL	chr5.178991768	5040	-0.317154	0.0266007	9.01e-33	5616	I	D	0.1583	0.0199	TRUE	7	???????????+?+???+????+??+????????++	43.8	10.6789	0.09882	0.0047158	-0.331904	0.0417541	1.88e-15	0.0473442	2.1e-11	214	FALSE	1
	cg05457628-chr5:179074122:SNP	cg05457628	TSS200;TSS200	NM_001040452.3_2;NM_001040451.3_2	RUFY1;RUFY1	Island	chr5	178986728	chr5:179074122:SNP	rs56191557	87394	0.641198	0.0146367	0	17728	A	G	0.1361	0.0225	TRUE	25	++++++??+?++?+?+++++??++?+?+++?++?++	29.3	33.9231	0.08605	0.0022722	0.637134	0.0183275	0.000000000000000000000000000000000000000000000000000000000000000000000000000000000000000000000000000000000000000000000000000000000000000000000000000000000000000000000000000000000000000000000000000000000000000000000000000000000000000000000000000000000000000000000000858	0.0206884	6.68e-211	214	FALSE	1
	cg05457628-chr5:179537838:SNP	cg05457628	TSS200;TSS200	NM_001040452.3_2;NM_001040451.3_2	RUFY1;RUFY1	Island	chr5	178986728	chr5:179537838:SNP	rs6601083	551110	0.0957316	0.0086566	1.99e-28	26628	T	C	0.4821	0.0197	TRUE	34	+++++++++-++++++++++++++?+?+++++++-+	0	31.8025	0.5266	0	0.0957316	0.0086566	1.99e-28	0.0086566	1.99e-28	214	FALSE	1
	cg05457628-chr5:178861889:SNP	cg05457628	TSS200;TSS200	NM_001040452.3_2;NM_001040451.3_2	RUFY1;RUFY1	Island	chr5	178986728	chr5:178861889:SNP	rs7732728	124839	0.177606	0.0159855	1.12e-28	22243	G	A	0.0992	0.0086	TRUE	29	-----+-?----?--+--+?----?-??-----?--	18	34.1532	0.1959	0.0016586	0.175455	0.0182882	8.49e-22	0.0194984	8.34e-20	214	FALSE	1
	cg05457628-chr5:178912074:SNP	cg05457628	TSS200;TSS200	NM_001040452.3_2;NM_001040451.3_2	RUFY1;RUFY1	Island	chr5	178986728	chr5:178912074:SNP	rs6601042	74654	-0.213936	0.0167864	3.34e-37	19158	G	A	0.1034	0.0128	TRUE	28	+++++?++++++++?-++++++??++??+??+++++	0	23.3916	0.6638	0	-0.213936	0.0167864	3.34e-37	0.0167864	3.34e-37	214	FALSE	1
	cg05457628-chr5:179091953:SNP	cg05457628	TSS200;TSS200	NM_001040452.3_2;NM_001040451.3_2	RUFY1;RUFY1	Island	chr5	178986728	chr5:179091953:SNP	rs4701148	105225	-0.303907	0.0138973	5.23e-106	19252	T	C	0.1569	0.0158	TRUE	27	------??----?---------?-?-??-----?-?	21.1	32.9708	0.1629	0.0014184	-0.303999	0.01615	4.85e-79	0.0176233	1.23e-66	214	FALSE	1
	cg05457628-chr5:179014900:SNP	cg05457628	TSS200;TSS200	NM_001040452.3_2;NM_001040451.3_2	RUFY1;RUFY1	Island	chr5	178986728	chr5:179014900:SNP	rs6874476	28172	-0.595236	0.0080406	0	27198	T	A	0.3852	0.0187	TRUE	35	++++++++++++++++++++++++?+++++++++++	69.4	111.198	3.957e-10	0.0052049	-0.593937	0.0152817	0	0.026297	1.95e-113	214	FALSE	1
	cg05457628-chr5:179109625:SNP	cg05457628	TSS200;TSS200	NM_001040452.3_2;NM_001040451.3_2	RUFY1;RUFY1	Island	chr5	178986728	chr5:179109625:SNP	rs28674071	122897	0.223166	0.0090302	7.69e-135	24427	T	C	0.4143	0.0147	TRUE	31	+++++++?++++++++++++?++?++??++++++++	14.8	35.2156	0.2349	0.0004468	0.22405	0.0100779	1.69e-109	0.0106001	2.14e-98	214	FALSE	1
	cg05457628-chr5:179172098:SNP	cg05457628	TSS200;TSS200	NM_001040452.3_2;NM_001040451.3_2	RUFY1;RUFY1	Island	chr5	178986728	chr5:179172098:SNP	rs10447304	185370	0.141919	0.0086691	3.1e-60	26222	A	G	0.5077	0.0205	TRUE	34	+++++++++++++++++++?++++++?+++++++++	5.6	34.9438	0.3758	0.0001527	0.142738	0.0090339	3.1e-56	0.0091798	6.46e-54	214	FALSE	1
	cg05457628-chr5:179094611:SNP	cg05457628	TSS200;TSS200	NM_001040452.3_2;NM_001040451.3_2	RUFY1;RUFY1	Island	chr5	178986728	chr5:179094611:SNP	rs17616992	107883	-0.191032	0.0106879	1.9e-71	19221	G	C	0.3371	0.0198	TRUE	25	++++++????++?+++++++??++?+??+++++?++	7.4	25.9189	0.3573	0.0002338	-0.191825	0.0113258	2.4e-64	0.0115425	1.59e-61	214	FALSE	1
	cg05457628-chr5:178943120:SNP	cg05457628	TSS200;TSS200	NM_001040452.3_2;NM_001040451.3_2	RUFY1;RUFY1	Island	chr5	178986728	chr5:178943120:SNP	rs10068263	43608	0.277994	0.0099985	3.92e-170	20952	T	C	0.3592	0.0454	TRUE	26	+++?+++?+?++++++++++??+??+??+++?++++	62.7	67.0027	1.062e-05	0.0044631	0.276967	0.0174648	1.23e-56	0.026797	3.25e-25	214	FALSE	1
	cg05457628-chr5:178850268:SNP	cg05457628	TSS200;TSS200	NM_001040452.3_2;NM_001040451.3_2	RUFY1;RUFY1	Island	chr5	178986728	chr5:178850268:SNP	rs72820692	136460	-0.174528	0.0123987	5.31e-45	25730	A	G	0.1505	0.0284	TRUE	33	-------------------?----?-?------+--	20.5	40.272	0.1496	0.0013295	-0.176574	0.0143937	1.36e-34	0.0156038	4.83e-29	214	FALSE	1
	cg05457628-chr5:179034025:SNP	cg05457628	TSS200;TSS200	NM_001040452.3_2;NM_001040451.3_2	RUFY1;RUFY1	Island	chr5	178986728	chr5:179034025:SNP	rs13179100	47297	0.622164	0.0146119	0	27138	G	A	0.0911	0.0086	TRUE	35	--------------------------?---------	45	61.8019	0.00246	0.0061872	0.623567	0.0207352	1.1e-198	0.0265601	2.39e-121	214	FALSE	1
	cg05457628-chr5:178981366:SNP	cg05457628	TSS200;TSS200	NM_001040452.3_2;NM_001040451.3_2	RUFY1;RUFY1	Island	chr5	178986728	chr5:178981366:SNP	rs62395249	5362	-0.527722	0.0090814	0	23184	T	C	0.3594	0.0199	TRUE	30	------??-?-----------?--?-?---------	57.5	68.2602	5.226e-05	0.0034104	-0.525202	0.0148124	0.0000000000000000000000000000000000000000000000000000000000000000000000000000000000000000000000000000000000000000000000000000000000000000000000000000000000000000000000000000000000000000000000000000000000000000000000000000000000000000000000000000000000000000000000000000000000227	0.0213759	1.45e-134	214	FALSE	1
	cg05457628-chr5:178969701:SNP	cg05457628	TSS200;TSS200	NM_001040452.3_2;NM_001040451.3_2	RUFY1;RUFY1	Island	chr5	178986728	chr5:178969701:SNP	rs10069354	17027	0.604663	0.0197443	5.75e-206	25948	T	A	0.0513	0.0086	TRUE	33	------------------------?-??--------	8.3	34.8947	0.332	0.0011826	0.604312	0.0210153	7.67e-182	0.0215304	1.53e-173	214	FALSE	1
	cg05457628-chr5:179136402:SNP	cg05457628	TSS200;TSS200	NM_001040452.3_2;NM_001040451.3_2	RUFY1;RUFY1	Island	chr5	178986728	chr5:179136402:SNP	rs7732112	149674	0.173729	0.009415	5e-76	22475	A	G	0.426	0.0192	TRUE	29	+++++++?+?++++++-++?+?++?+??++++++++	30.1	40.0696	0.06519	0.0011291	0.176243	0.0118327	3.58e-50	0.0134735	4.86e-38	214	FALSE	1
	cg05457628-chr5:179002951:SNP	cg05457628	TSS200;TSS200	NM_001040452.3_2;NM_001040451.3_2	RUFY1;RUFY1	Island	chr5	178986728	chr5:179002951:SNP	rs6422331	16223	0.105078	0.0101458	3.9e-25	27706	G	T	0.2316	0.0272	TRUE	36	---------------+--------------------	17.9	42.6534	0.1752	0.00082	0.106601	0.0115238	2.23e-20	0.0123644	1.92e-17	214	FALSE	1
	cg05457628-chr5:179037466:SNP	cg05457628	TSS200;TSS200	NM_001040452.3_2;NM_001040451.3_2	RUFY1;RUFY1	Island	chr5	178986728	chr5:179037466:SNP	rs61013175	50738	-0.426165	0.0104651	0	16768	T	C	0.4353	0.0268	TRUE	21	?--??--???--?--?----??--?-?-?--??---	52.4	42.0302	0.002741	0.0026016	-0.423408	0.016207	1.9e-150	0.0219924	1.19e-83	214	FALSE	1
	cg05457628-chr5:178885202:SNP	cg05457628	TSS200;TSS200	NM_001040452.3_2;NM_001040451.3_2	RUFY1;RUFY1	Island	chr5	178986728	chr5:178885202:SNP	rs13159851	101526	0.150136	0.0127084	3.31e-32	27240	G	A	0.13	0.015	TRUE	35	----+------+---+--------?----------+	24.3	44.8981	0.1001	0.0018409	0.146631	0.0152362	6.34e-22	0.0167819	3.68e-19	214	FALSE	1
	cg05457628-chr5:179001207:SNP	cg05457628	TSS200;TSS200	NM_001040452.3_2;NM_001040451.3_2	RUFY1;RUFY1	Island	chr5	178986728	chr5:179001207:SNP	rs9329084	14479	0.517059	0.0081453	0	27720	A	C	0.3847	0.0226	TRUE	36	++++++++++++++++++++++++++++++++++++	63.6	96.0995	1.329e-07	0.0042233	0.513951	0.0141888	0.0000000000000000000000000000000000000000000000000000000000000000000000000000000000000000000000000000000000000000000000000000000000000000000000000000000000000000000000000000000000000000000000000000000000000000000000000000000000000000000000000000000000000000000000000000000000000000000000272	0.0223644	2.94e-118	214	FALSE	1
	cg05457628-chr5:179115566:SNP	cg05457628	TSS200;TSS200	NM_001040452.3_2;NM_001040451.3_2	RUFY1;RUFY1	Island	chr5	178986728	chr5:179115566:SNP	rs56159807	128838	0.232056	0.010175	3.96e-115	19889	A	G	0.3812	0.0137	TRUE	26	++++++??+?+++++++++??++??+??++++?+++	22.3	32.1851	0.1527	0.0007922	0.232832	0.0121059	1.96e-82	0.0130994	3.21e-70	214	FALSE	1
	cg05457628-chr5:179216890:SNP	cg05457628	TSS200;TSS200	NM_001040452.3_2;NM_001040451.3_2	RUFY1;RUFY1	Island	chr5	178986728	chr5:179216890:SNP	rs56365546	230162	0.169121	0.0101672	3.95e-62	19584	C	G	0.4132	0.0308	TRUE	25	+++?+++?+?++++++-++???+??+?++++?+?++	23.7	31.4576	0.141	0.0008221	0.170746	0.0122	1.66e-44	0.0133265	6.67e-37	214	FALSE	1
	cg05457628-chr5:178912416:SNP	cg05457628	TSS200;TSS200	NM_001040452.3_2;NM_001040451.3_2	RUFY1;RUFY1	Island	chr5	178986728	chr5:178912416:SNP	rs4701178	74312	-0.212081	0.0191449	1.61e-28	15377	C	G	0.0992	0.0142	TRUE	23	---?-?-?-?----?+----????--??-??-----	0	17.6293	0.7277	0	-0.212081	0.0191449	1.61e-28	0.0191449	1.61e-28	214	FALSE	1
	cg05457628-chr5:179090013:SNP	cg05457628	TSS200;TSS200	NM_001040452.3_2;NM_001040451.3_2	RUFY1;RUFY1	Island	chr5	178986728	chr5:179090013:SNP	rs112637075	103285	-0.294061	0.0174909	1.99e-63	16388	A	G	0.1127	0.0156	TRUE	23	------????--?--??---?-?-?-??-----?--	0	15.2661	0.8506	0	-0.294061	0.0174909	1.99e-63	0.0174909	1.99e-63	214	FALSE	1
	cg05457628-chr5:179175959:INDEL	cg05457628	TSS200;TSS200	NM_001040452.3_2;NM_001040451.3_2	RUFY1;RUFY1	Island	chr5	178986728	chr5:179175959:INDEL	chr5.179175959	189231	-0.141383	0.0096979	3.83e-48	21417	D	I	0.45	0.0328	TRUE	28	-------?-?---------?----?-?-?--??---	0	24.8855	0.5809	0	-0.141383	0.0096979	3.83e-48	0.0096979	3.83e-48	214	FALSE	1
	cg05457628-chr5:178980474:SNP	cg05457628	TSS200;TSS200	NM_001040452.3_2;NM_001040451.3_2	RUFY1;RUFY1	Island	chr5	178986728	chr5:178980474:SNP	rs7723230	6254	0.859401	0.0071181	0	27222	C	T	0.3849	0.016	TRUE	35	------------------------?-----------	78.2	156.165	1.404e-17	0.0064518	0.855421	0.0159637	0	0.0326939	2.75e-152	214	FALSE	1
	cg05457628-chr5:178975899:SNP	cg05457628	TSS200;TSS200	NM_001040452.3_2;NM_001040451.3_2	RUFY1;RUFY1	Island	chr5	178986728	chr5:178975899:SNP	rs6896112	10829	0.759156	0.0077843	0	24997	C	T	0.4103	0.0204	TRUE	33	-------?-?--------------?-----------	72.2	114.96	2.76e-11	0.0052563	0.754324	0.0154958	0	0.0279651	2.78e-162	214	FALSE	1
	cg05457628-chr5:179554522:SNP	cg05457628	TSS200;TSS200	NM_001040452.3_2;NM_001040451.3_2	RUFY1;RUFY1	Island	chr5	178986728	chr5:179554522:SNP	rs7728345	567794	-0.130771	0.0120185	1.42e-27	23366	T	C	0.1846	0.0275	TRUE	30	-------?-?-----+-----?--?-??-----++-	0	23.3865	0.7586	0	-0.130771	0.0120185	1.42e-27	0.0120185	1.42e-27	214	FALSE	1
	cg05457628-chr5:179070894:SNP	cg05457628	TSS200;TSS200	NM_001040452.3_2;NM_001040451.3_2	RUFY1;RUFY1	Island	chr5	178986728	chr5:179070894:SNP	rs78109239	84166	-0.479561	0.0184604	8.81e-149	20065	G	A	0.0774	0.0084	TRUE	28	+++++++?++++?++++++++??+?+??+++++?++	0	21.4096	0.7667	0	-0.479561	0.0184604	8.81e-149	0.0184604	8.81e-149	214	FALSE	1
	cg05457628-chr5:178972705:SNP	cg05457628	TSS200;TSS200	NM_001040452.3_2;NM_001040451.3_2	RUFY1;RUFY1	Island	chr5	178986728	chr5:178972705:SNP	rs10464056	14023	0.586157	0.0094055	0	26451	T	G	0.2482	0.0151	TRUE	34	+++++++?++++++++++++++++?+++++++++++	44.3	59.2294	0.003367	0.0024223	0.585456	0.0132315	0	0.0168813	0.00000000000000000000000000000000000000000000000000000000000000000000000000000000000000000000000000000000000000000000000000000000000000000000000000000000000000000000000000000000000000000000000000000000000000000000000000000000000000000000000000000000000000000000000364	214	FALSE	1
	cg05457628-chr5:178879144:SNP	cg05457628	TSS200;TSS200	NM_001040452.3_2;NM_001040451.3_2	RUFY1;RUFY1	Island	chr5	178986728	chr5:178879144:SNP	rs62394903	107584	-0.249126	0.0194954	2.16e-37	9081	A	G	0.1701	0.0192	TRUE	13	-??--?-?-??--??-?-???-??????-??--???	17.1	14.477	0.2713	0.0010495	-0.24911	0.0219697	8.43e-30	0.0235195	3.24e-26	214	FALSE	1
	cg05457628-chr5:178910952:SNP	cg05457628	TSS200;TSS200	NM_001040452.3_2;NM_001040451.3_2	RUFY1;RUFY1	Island	chr5	178986728	chr5:178910952:SNP	rs11747273	75776	0.104015	0.0095341	1.04e-27	23266	A	T	0.3782	0.0182	TRUE	28	+++++?+?++++++++-+?++?+??+??++++++++	21.9	34.5504	0.1506	0.0007236	0.103586	0.0111876	2.06e-20	0.0122003	1.52e-17	214	FALSE	1
	cg05457628-chr5:179064277:SNP	cg05457628	TSS200;TSS200	NM_001040452.3_2;NM_001040451.3_2	RUFY1;RUFY1	Island	chr5	178986728	chr5:179064277:SNP	rs55692357	77549	0.26334	0.0186997	4.86e-45	13573	T	C	0.115	0.014	TRUE	16	?++??+????+-?++??+?+??++?+???++???++	36.9	23.7777	0.06897	0.0034019	0.26258	0.0251601	1.69e-25	0.0296424	6.46e-19	214	FALSE	1
	cg05457628-chr5:179139918:SNP	cg05457628	TSS200;TSS200	NM_001040452.3_2;NM_001040451.3_2	RUFY1;RUFY1	Island	chr5	178986728	chr5:179139918:SNP	rs7444571	153190	0.150163	0.0102144	6.34e-49	18922	A	T	0.4918	0.0264	TRUE	24	+++++?+?+?++++?-++??+?+??+??+++?++++	42.6	40.0637	0.01512	0.0019028	0.150609	0.0143592	9.74e-26	0.0177924	3.18e-17	214	FALSE	1
	cg05457628-chr5:179066140:SNP	cg05457628	TSS200;TSS200	NM_001040452.3_2;NM_001040451.3_2	RUFY1;RUFY1	Island	chr5	178986728	chr5:179066140:SNP	rs6601060	79412	-0.465754	0.0169162	7.08e-167	7367	C	A	0.324	0.0165	TRUE	13	?++?+?????++?+?+?+???????+??+??+??++	68.4	38.0046	0.0001533	0.0083028	-0.446914	0.0317965	7.13e-45	0.0535746	3.51e-18	214	FALSE	1
	cg05457628-chr5:179056115:SNP	cg05457628	TSS200;TSS200	NM_001040452.3_2;NM_001040451.3_2	RUFY1;RUFY1	Island	chr5	178986728	chr5:179056115:SNP	rs77887014	69387	-0.375194	0.0127503	2.54e-190	11741	G	A	0.428	0.0324	TRUE	15	+++???????++?+??+++???+??+??+???+?++	0	12.5727	0.5604	0	-0.375194	0.0127503	2.54e-190	0.0127503	2.54e-190	214	FALSE	1
	cg05457628-chr5:179035080:SNP	cg05457628	TSS200;TSS200	NM_001040452.3_2;NM_001040451.3_2	RUFY1;RUFY1	Island	chr5	178986728	chr5:179035080:SNP	rs72824534	48352	-0.462715	0.0133052	0.000000000000000000000000000000000000000000000000000000000000000000000000000000000000000000000000000000000000000000000000000000000000000000000000000000000000000000000000000000000000000000000000000000000000000000000000000000000000000000000000000000000000000000000000541	27723	A	G	0.1114	0.0119	TRUE	36	------------------------------------	0	33.1093	0.5596	0	-0.462715	0.0133052	0.000000000000000000000000000000000000000000000000000000000000000000000000000000000000000000000000000000000000000000000000000000000000000000000000000000000000000000000000000000000000000000000000000000000000000000000000000000000000000000000000000000000000000000000000541	0.0133052	0.000000000000000000000000000000000000000000000000000000000000000000000000000000000000000000000000000000000000000000000000000000000000000000000000000000000000000000000000000000000000000000000000000000000000000000000000000000000000000000000000000000000000000000000000541	214	FALSE	1
	cg05457628-chr5:178890164:SNP	cg05457628	TSS200;TSS200	NM_001040452.3_2;NM_001040451.3_2	RUFY1;RUFY1	Island	chr5	178986728	chr5:178890164:SNP	rs77053195	96564	-0.272412	0.0190558	2.34e-46	14299	T	C	0.1086	0.0139	TRUE	19	---?-?-?-?--?-?+--????-??-??-??--?-+	27	24.655	0.1347	0.0026595	-0.267551	0.0237923	2.44e-29	0.0261012	1.68e-25	214	FALSE	1
	cg05457628-chr5:179043647:SNP	cg05457628	TSS200;TSS200	NM_001040452.3_2;NM_001040451.3_2	RUFY1;RUFY1	Island	chr5	178986728	chr5:179043647:SNP	rs12188476	56919	-0.431413	0.0082324	0	27137	G	T	0.4406	0.0224	TRUE	35	++++++++++++++++++++++++++?+++++++++	50.8	69.0712	0.0003519	0.0024789	-0.432268	0.0123562	0.000000000000000000000000000000000000000000000000000000000000000000000000000000000000000000000000000000000000000000000000000000000000000000000000000000000000000000000000000000000000000000000000000000000000000000000000000000000000000000000000000000000000000000000000000398	0.0167243	9.93e-147	214	FALSE	1
	cg05457628-chr5:178938973:SNP	cg05457628	TSS200;TSS200	NM_001040452.3_2;NM_001040451.3_2	RUFY1;RUFY1	Island	chr5	178986728	chr5:178938973:SNP	rs184899434	47755	0.431336	0.0269924	1.76e-57	18037	A	G	0.0407	0.0064	TRUE	21	+++???+????+?++??+++??++?+??++++++-+	47.5	38.059	0.00871	0.0142124	0.439392	0.0400701	5.59e-28	0.0513652	4.56e-17	214	FALSE	1
	cg05457628-chr5:179039486:SNP	cg05457628	TSS200;TSS200	NM_001040452.3_2;NM_001040451.3_2	RUFY1;RUFY1	Island	chr5	178986728	chr5:179039486:SNP	rs13182282	52758	0.849165	0.0089904	0	21617	C	T	0.2904	0.0385	TRUE	27	---??--?-?----------??--?-?----?----	86.5	193.139	1.799e-27	0.01433	0.820464	0.0256821	5.97e-224	0.0667845	4.88e-37	214	FALSE	1
	cg05457628-chr5:178978838:INDEL	cg05457628	TSS200;TSS200	NM_001040452.3_2;NM_001040451.3_2	RUFY1;RUFY1	Island	chr5	178986728	chr5:178978838:INDEL	chr5.178978838	7890	0.856976	0.0075517	0	24275	I	D	0.3848	0.0173	TRUE	32	-------?-?--------------?------?----	76.9	134.452	7.62e-15	0.006181	0.85136	0.016527	0	0.0327527	6.65e-151	214	FALSE	1
	cg05457628-chr5:178974598:SNP	cg05457628	TSS200;TSS200	NM_001040452.3_2;NM_001040451.3_2	RUFY1;RUFY1	Island	chr5	178986728	chr5:178974598:SNP	rs58858932	12130	0.34186	0.0132689	2.25e-146	25767	A	G	0.1244	0.0103	TRUE	33	+++++++?++++++++++++++++?++?++++++++	62.2	84.6728	1.202e-06	0.0096909	0.341786	0.0227583	5.59e-51	0.0351099	2.1e-22	214	FALSE	1
	cg05457628-chr5:179056094:SNP	cg05457628	TSS200;TSS200	NM_001040452.3_2;NM_001040451.3_2	RUFY1;RUFY1	Island	chr5	178986728	chr5:179056094:SNP	rs191493392	69366	-0.25889	0.0161667	1.02e-57	20051	G	C	0.1116	0.0195	TRUE	25	+++??+??+?++++++++++??++?+?++?+?++++	0	22.3948	0.5557	0	-0.25889	0.0161667	1.02e-57	0.0161667	1.02e-57	214	FALSE	1
	cg05457628-chr5:178912516:SNP	cg05457628	TSS200;TSS200	NM_001040452.3_2;NM_001040451.3_2	RUFY1;RUFY1	Island	chr5	178986728	chr5:178912516:SNP	rs13157984	74212	0.105222	0.0093811	3.39e-29	24065	T	G	0.3769	0.0186	TRUE	29	+++++?++++++++++-+?++?+??+??++++++++	15.9	33.2765	0.2257	0.0004885	0.10491	0.0105192	2e-23	0.0111489	3.81e-21	214	FALSE	1
	cg05457628-chr5:178981241:SNP	cg05457628	TSS200;TSS200	NM_001040452.3_2;NM_001040451.3_2	RUFY1;RUFY1	Island	chr5	178986728	chr5:178981241:SNP	rs10479542	5487	0.859892	0.0071172	0	27219	A	T	0.3849	0.016	TRUE	35	++++++++++++++++++++++++?+++++++++++	78.4	157.718	7.546e-18	0.0065323	0.855907	0.0160376	0	0.0330153	1.52e-149	214	FALSE	1
	cg05457628-chr5:178991685:INDEL	cg05457628	TSS200;TSS200	NM_001040452.3_2;NM_001040451.3_2	RUFY1;RUFY1	Island	chr5	178986728	chr5:178991685:INDEL	chr5.178991685	4957	-0.280807	0.0239942	1.23e-31	6956	D	I	0.1411	0.014	TRUE	9	-???-?-?-???-??-????-???????-???-???	11.1	9.00341	0.342	0.000669	-0.279193	0.0257764	2.45e-27	0.0270037	2.51e-25	214	FALSE	1
	cg05457628-chr5:179023990:SNP	cg05457628	TSS200;TSS200	NM_001040452.3_2;NM_001040451.3_2	RUFY1;RUFY1	Island	chr5	178986728	chr5:179023990:SNP	rs62397281	37262	-0.371627	0.0400051	1.55e-20	5179	A	G	0.0676	0.0124	TRUE	10	?--?-??????-?-???-???????-??-?????+-	17.8	10.9534	0.2789	0.0036446	-0.366039	0.0457877	1.3e-15	0.0486881	2.3e-14	214	FALSE	1
	cg05457628-chr5:178990171:SNP	cg05457628	TSS200;TSS200	NM_001040452.3_2;NM_001040451.3_2	RUFY1;RUFY1	Island	chr5	178986728	chr5:178990171:SNP	rs73330351	3443	0.633252	0.0144342	0	27743	G	C	0.0905	0.0087	TRUE	36	------------------------------------	39.4	57.7525	0.009095	0.0049349	0.634718	0.0194526	1.6e-233	0.0238174	9.39e-156	214	FALSE	1
	cg05457628-chr5:178950263:INDEL	cg05457628	TSS200;TSS200	NM_001040452.3_2;NM_001040451.3_2	RUFY1;RUFY1	Island	chr5	178986728	chr5:178950263:INDEL	chr5.178950263	36465	0.495372	0.0106248	0	16090	I	D	0.4358	0.0218	TRUE	20	?--??--???--?--?----??--?-???--??---	35	29.2527	0.06211	0.0012529	0.495055	0.0139827	0.000000000000000000000000000000000000000000000000000000000000000000000000000000000000000000000000000000000000000000000000000000000000000000000000000000000000000000000000000000000000000000000000000000000000000000000000000000000000000000000000000000000000000000000000000000000144	0.0163581	1.93e-201	214	FALSE	1
	cg05457628-chr5:178988234:SNP	cg05457628	TSS200;TSS200	NM_001040452.3_2;NM_001040451.3_2	RUFY1;RUFY1	Island	chr5	178986728	chr5:178988234:SNP	rs55640631	1506	-0.556273	0.0114828	0	15239	A	T	0.3167	0.0234	TRUE	19	?--??-????--?--?----??--?-???--??---	63.9	49.9277	7.741e-05	0.0045918	-0.55	0.0206479	2.53e-156	0.0318505	2.64e-68	214	FALSE	1
	cg05457628-chr5:178917641:SNP	cg05457628	TSS200;TSS200	NM_001040452.3_2;NM_001040451.3_2	RUFY1;RUFY1	Island	chr5	178986728	chr5:178917641:SNP	rs78707533	69087	-0.137198	0.018407	9.09e-14	17859	C	T	0.0919	0.0122	TRUE	26	+++++?+?++++++?-++++++???+??+??+++++	28.3	34.8476	0.091	0.0035202	-0.138864	0.0225482	7.34e-10	0.0256576	8.93e-08	214	FALSE	1
	cg05457628-chr5:179171217:SNP	cg05457628	TSS200;TSS200	NM_001040452.3_2;NM_001040451.3_2	RUFY1;RUFY1	Island	chr5	178986728	chr5:179171217:SNP	rs62406180	184489	0.142093	0.0086758	2.74e-60	26213	T	G	0.5071	0.0205	TRUE	34	+++++++++++++++++++?++++++?+++++++++	2.2	33.73	0.432	5.74e-05	0.142419	0.0088172	1.09e-58	0.0088677	8.73e-58	214	FALSE	1
	cg05457628-chr5:179060593:SNP	cg05457628	TSS200;TSS200	NM_001040452.3_2;NM_001040451.3_2	RUFY1;RUFY1	Island	chr5	178986728	chr5:179060593:SNP	rs79193801	73865	-0.475597	0.0170645	6.07e-171	23613	T	G	0.0774	0.0096	TRUE	30	------?--------------?--?-??-----?--	0	20.9545	0.8608	0	-0.475597	0.0170645	6.07e-171	0.0170645	6.07e-171	214	FALSE	1
	cg05457628-chr5:178888144:SNP	cg05457628	TSS200;TSS200	NM_001040452.3_2;NM_001040451.3_2	RUFY1;RUFY1	Island	chr5	178986728	chr5:178888144:SNP	rs4700824	98584	0.166656	0.0127611	5.6e-39	27735	A	G	0.1258	0.0143	TRUE	36	++++-++++++-+++-++++++++-++++++++++-	19	43.2177	0.1604	0.0013981	0.163078	0.0147049	1.4e-28	0.0157573	3.84e-26	214	FALSE	1
	cg05457628-chr5:179250392:SNP	cg05457628	TSS200;TSS200	NM_001040452.3_2;NM_001040451.3_2	RUFY1;RUFY1	Island	chr5	178986728	chr5:179250392:SNP	rs10464093	263664	-0.138894	0.0086973	2.07e-57	26454	A	G	0.476	0.0375	TRUE	34	-------?-------++-------?-----------	16	39.2914	0.2087	0.0004973	-0.140635	0.0097724	5.89e-47	0.0103554	5.09e-41	214	FALSE	1
	cg05457628-chr5:179069912:SNP	cg05457628	TSS200;TSS200	NM_001040452.3_2;NM_001040451.3_2	RUFY1;RUFY1	Island	chr5	178986728	chr5:179069912:SNP	rs75942553	83184	-0.473949	0.0173066	4.1e-165	22822	T	C	0.0773	0.0085	TRUE	29	-------?----?--------?--?-??-----?--	0	22.073	0.7779	0	-0.473949	0.0173066	4.1e-165	0.0173066	4.1e-165	214	FALSE	1
	cg05457628-chr5:179056111:SNP	cg05457628	TSS200;TSS200	NM_001040452.3_2;NM_001040451.3_2	RUFY1;RUFY1	Island	chr5	178986728	chr5:179056111:SNP	rs61078164	69383	-0.372414	0.0180079	5.18e-95	13075	G	A	0.1423	0.0365	TRUE	20	+++?+???+?++?+?++++????+?+??+++?+?++	46.9	35.7948	0.01118	0.0059189	-0.381438	0.0265976	1.21e-46	0.0339257	4.91e-28	214	FALSE	1
	cg05457628-chr5:179335022:SNP	cg05457628	TSS200;TSS200	NM_001040452.3_2;NM_001040451.3_2	RUFY1;RUFY1	Island	chr5	178986728	chr5:179335022:SNP	rs185708704	348294	0.345804	0.028838	3.95e-33	13667	C	G	0.0524	0.0133	TRUE	18	?++?++?????+?+++++++??++?+???++????+	32.7	25.2782	0.08865	0.007602	0.33637	0.0378284	6e-19	0.0428807	7.36e-16	214	FALSE	1
	cg05457628-chr5:179148335:SNP	cg05457628	TSS200;TSS200	NM_001040452.3_2;NM_001040451.3_2	RUFY1;RUFY1	Island	chr5	178986728	chr5:179148335:SNP	rs10794700	161607	-0.15421	0.0086702	9.04e-71	26232	C	G	0.4846	0.0213	TRUE	34	-------------------?------?---------	18.7	40.5784	0.171	0.0005956	-0.156311	0.009944	1.12e-55	0.0106613	2.03e-47	214	FALSE	1
	cg05457628-chr5:178908931:SNP	cg05457628	TSS200;TSS200	NM_001040452.3_2;NM_001040451.3_2	RUFY1;RUFY1	Island	chr5	178986728	chr5:178908931:SNP	rs10043910	77797	-0.124778	0.0094119	4.08e-40	23955	G	A	0.3548	0.0242	TRUE	31	+++++++?+?++++++++?+++++?+?+-+++++-+	13.6	34.7291	0.2526	0.0004402	-0.125818	0.0104106	1.26e-33	0.0108955	2.29e-30	214	FALSE	1
	cg05457628-chr5:178971837:SNP	cg05457628	TSS200;TSS200	NM_001040452.3_2;NM_001040451.3_2	RUFY1;RUFY1	Island	chr5	178986728	chr5:178971837:SNP	rs6601048	14891	0.660369	0.0085548	0	26452	A	T	0.2998	0.0189	TRUE	34	+++++++?++++++++++++++++?+++++++++++	60.6	83.7924	2.662e-06	0.0038805	0.657603	0.0143503	0	0.021722	5.33e-203	214	FALSE	1
	cg05457628-chr5:179416059:SNP	cg05457628	TSS200;TSS200	NM_001040452.3_2;NM_001040451.3_2	RUFY1;RUFY1	Island	chr5	178986728	chr5:179416059:SNP	rs1102190	429331	-0.124201	0.0087264	5.74e-46	27216	T	C	0.3946	0.0259	TRUE	35	---------------++-------?---------+-	18.3	41.61	0.1733	0.000604	-0.123932	0.0099433	1.18e-35	0.0106796	2.91e-31	214	FALSE	1
	cg05457628-chr5:178987556:INDEL	cg05457628	TSS200;TSS200	NM_001040452.3_2;NM_001040451.3_2	RUFY1;RUFY1	Island	chr5	178986728	chr5:178987556:INDEL	chr5.178987556	828	-0.621025	0.0104267	0	15237	I	D	0.451	0.0144	TRUE	19	?++??+????++?++?++++??++?+???++??+++	57	41.8844	0.001148	0.002835	-0.61921	0.0172045	0.000000000000000000000000000000000000000000000000000000000000000000000000000000000000000000000000000000000000000000000000000000000000000000000000000000000000000000000000000000000000000000000000000000000000000000000000000000000000000000000000000000000000000000000000000000000000000000115	0.0242619	1.66e-144	214	FALSE	1
	cg05457628-chr5:178950607:SNP	cg05457628	TSS200;TSS200	NM_001040452.3_2;NM_001040451.3_2	RUFY1;RUFY1	Island	chr5	178986728	chr5:178950607:SNP	rs114835164	36121	-0.440132	0.0511893	8.1e-18	6458	A	G	0.0326	0.0084	TRUE	12	?--?-?-????-???---???????-?????-??--	19.6	13.6794	0.2512	0.0078374	-0.437382	0.0584109	6.99e-14	0.0636581	4.71e-12	214	FALSE	1
	cg05457628-chr5:178971930:INDEL	cg05457628	TSS200;TSS200	NM_001040452.3_2;NM_001040451.3_2	RUFY1;RUFY1	Island	chr5	178986728	chr5:178971930:INDEL	chr5.178971930	14798	0.678114	0.0099252	0	16064	D	I	0.4623	0.022	TRUE	20	?++??++???++?++?++++??++?+???++??+++	49.7	37.8024	0.006288	0.0020051	0.677559	0.0149971	0	0.0197473	0.00000000000000000000000000000000000000000000000000000000000000000000000000000000000000000000000000000000000000000000000000000000000000000000000000000000000000000000000000000000000000000000000000000000000000000000000000000000000000000000000000000000000000000201	214	FALSE	1
	cg05457628-chr5:178983748:SNP	cg05457628	TSS200;TSS200	NM_001040452.3_2;NM_001040451.3_2	RUFY1;RUFY1	Island	chr5	178986728	chr5:178983748:SNP	rs10064596	2980	0.961272	0.0070531	0	24998	A	G	0.3643	0.0201	TRUE	33	+++++++?+?++++++++++++++?+++++++++++	83.2	190.961	1.544e-24	0.0082703	0.953997	0.017982	0	0.0420899	1.9e-115	214	FALSE	1
	cg05457628-chr5:179051227:SNP	cg05457628	TSS200;TSS200	NM_001040452.3_2;NM_001040451.3_2	RUFY1;RUFY1	Island	chr5	178986728	chr5:179051227:SNP	rs74452694	64499	-0.269174	0.0140325	5.21e-82	27250	T	G	0.1084	0.021	TRUE	35	------------------------?-----------	0	27.7154	0.7681	0	-0.269174	0.0140325	5.21e-82	0.0140325	5.21e-82	214	FALSE	1
	cg05457628-chr5:179257171:SNP	cg05457628	TSS200;TSS200	NM_001040452.3_2;NM_001040451.3_2	RUFY1;RUFY1	Island	chr5	178986728	chr5:179257171:SNP	rs695191	270443	0.139476	0.0085609	1.12e-59	27206	C	A	0.458	0.025	TRUE	35	---------------++-------?-----------	22.9	44.0824	0.1154	0.0007711	0.14088	0.010115	4.29e-44	0.0110996	3.25e-36	214	FALSE	1
	cg05457628-chr5:178941556:SNP	cg05457628	TSS200;TSS200	NM_001040452.3_2;NM_001040451.3_2	RUFY1;RUFY1	Island	chr5	178986728	chr5:178941556:SNP	rs11747991	45172	-0.279262	0.0270148	4.78e-25	12398	A	G	0.0547	0.0087	TRUE	16	?--???-???--?--?----??-??-???-????--	35	23.0757	0.08255	0.0065873	-0.277204	0.0361739	1.82e-14	0.0415591	1.82e-11	214	FALSE	1
	cg05457628-chr5:179008986:SNP	cg05457628	TSS200;TSS200	NM_001040452.3_2;NM_001040451.3_2	RUFY1;RUFY1	Island	chr5	178986728	chr5:179008986:SNP	rs72824515	22258	-0.466104	0.0133007	0.0000000000000000000000000000000000000000000000000000000000000000000000000000000000000000000000000000000000000000000000000000000000000000000000000000000000000000000000000000000000000000000000000000000000000000000000000000000000000000000000000000000000000000000000000000489	27737	G	T	0.1115	0.0117	TRUE	36	++++++++++++++++++++++++++++++++++++	0	32.3281	0.5978	0	-0.466104	0.0133007	0.0000000000000000000000000000000000000000000000000000000000000000000000000000000000000000000000000000000000000000000000000000000000000000000000000000000000000000000000000000000000000000000000000000000000000000000000000000000000000000000000000000000000000000000000000000489	0.0133007	0.0000000000000000000000000000000000000000000000000000000000000000000000000000000000000000000000000000000000000000000000000000000000000000000000000000000000000000000000000000000000000000000000000000000000000000000000000000000000000000000000000000000000000000000000000000489	214	FALSE	1
	cg05457628-chr5:179069094:SNP	cg05457628	TSS200;TSS200	NM_001040452.3_2;NM_001040451.3_2	RUFY1;RUFY1	Island	chr5	178986728	chr5:179069094:SNP	rs7724999	82366	0.199355	0.0198389	9.31e-24	5322	T	G	0.3874	0.0174	TRUE	9	?++???????++?+???+???????+????????++	45.8	14.7695	0.06378	0.0031517	0.199551	0.0288018	4.26e-12	0.0366263	5.24e-08	214	FALSE	1
	cg05457628-chr5:179066006:SNP	cg05457628	TSS200;TSS200	NM_001040452.3_2;NM_001040451.3_2	RUFY1;RUFY1	Island	chr5	178986728	chr5:179066006:SNP	rs6875168	79278	-0.289226	0.0136393	8.53e-100	23111	A	G	0.1396	0.0242	TRUE	30	------?-----?-----------?-??-----?--	0	22.4067	0.803	0	-0.289226	0.0136393	8.53e-100	0.0136393	8.53e-100	214	FALSE	1
	cg05457628-chr5:178881133:SNP	cg05457628	TSS200;TSS200	NM_001040452.3_2;NM_001040451.3_2	RUFY1;RUFY1	Island	chr5	178986728	chr5:178881133:SNP	rs60996654	105595	0.150384	0.0127061	2.56e-32	27246	G	A	0.1302	0.0149	TRUE	35	----+------+---+--------?----------+	23	44.156	0.1139	0.001715	0.146935	0.0150874	2.06e-22	0.0165015	7.99e-20	214	FALSE	1
[truncated: 101,581 more rows]

## Sheet: S7
	Supplementary Table 7 A total of 549 blood mQTLs overlapped with the genetic variants reaching P<10-5 in the ADRD GWAS described in Bellenguez et al. (2022)(PMID: 35379992). The mQTLs in blood were obtained from the GoDMC database (PMID:34493871). Annotations for CpGs include location of the CpG based on hg38/GRCh38 genomic annotation (Chr, Position), and Illumina gene annotation (UCSC_RefGene_Na…
[truncated: 1,103 more rows]

[truncated: 9 more sheets: S8, S9, S10, S11, S12, S13, S14, S15, S16]
